# Supplementary material for: Thiamin addition to soil increases potato tuber thiamin content under greenhouse conditions
Source: PeerJ. 2026 Jan 29;14:e20684. doi: 10.7717/peerj.20684 (PMC12861137; doi:10.7717/peerj.20684)
Supplement: Supplemental Information 7 — Two and three sensors were used to determine soil temperature and water content in pots with Clearwater Russet (Ports 1 and 2) and Snowden (Ports 1, 2 and 5), respectively. Soil water content calibration was performed according to the manufacturer’s recommendations. [file peerj-14-20684-s007.xlsx]

## Sheet: Clearwater Russet
z6-16679	Port 1	Port 1	Port 1	Port 2	Port 2	Port 2
Timestamp	raw Raw VWC	°C Soil Temperature	mS/cm Bulk EC	raw Raw VWC	°C Soil Temperature	mS/cm Bulk EC
2024-04-19	2168.5	18.03	0.0457088	2002.1	17.83	0.0269774
2024-04-19 00:30:00	2167.1	17.86	0.044978	2001.5	17.67	0.0269774
2024-04-19 01:00:00	2165.6	17.72	0.044978	2001.3	17.48	0.0269774
2024-04-19 01:30:00	2164.3	17.58	0.044978	2000.6	17.43	0.0269774
2024-04-19 02:00:00	2162.8	17.48	0.0448745	2000	17.47	0.0268534
2024-04-19 02:30:00	2161.4	17.4	0.0448745	1999.4	17.38	0.0263633
2024-04-19 03:00:00	2160.1	17.32	0.044978	1998.7	17.31	0.0260615
2024-04-19 03:30:00	2158.8	17.18	0.0444631	1997.9	17.36	0.0261216
2024-04-19 04:00:00	2157.3	17.1	0.0442588	1997.2	17.36	0.0260615
2024-04-19 04:30:00	2155.9	17.01	0.0446684	1996.7	17.32	0.0260016
2024-04-19 05:00:00	2154.5	16.96	0.0443609	1995.9	17.41	0.0259418
2024-04-19 05:30:00	2153.2	16.9	0.0439542	1995.1	17.33	0.0259418
2024-04-19 06:00:00	2151.9	16.9	0.044157	1994.5	17.35	0.0259418
2024-04-19 06:30:00	2150.4	16.9	0.0440555	1993.8	17.49	0.0258226
2024-04-19 07:00:00	2149	16.9	0.0439542	1992.7	17.3	0.025293
2024-04-19 07:30:00	2147	16.9	0.0439542	1990.6	17.17	0.0251189
2024-04-19 08:00:00	2144.5	17.1	0.0439542	1985.8	18.11	0.0249459
2024-04-19 08:30:00	2140.2	17.31	0.043451	1979.7	20.49	0.0243781
2024-04-19 09:00:00	2135.6	17.29	0.0430527	1974.8	22.31	0.0241546
2024-04-19 09:30:00	2129.3	17.5	0.0429536	1969.2	23.94	0.0233884
2024-04-19 10:00:00	2121.5	17.85	0.0425598	1964.2	24.54	0.0229615
2024-04-19 10:30:00	2113.2	18.34	0.041783	1960.7	24.16	0.0221309
2024-04-19 11:00:00	2104.1	18.92	0.0410204	1956.9	24.61	0.0213796
2024-04-19 11:30:00	2095.6	19.46	0.040738	1953.2	24.71	0.0206538
2024-04-19 12:00:00	2087.6	20.09	0.0399945	1949.2	24.81	0.0200447
2024-04-19 12:30:00	2079.4	20.79	0.0394457	1944.9	25.3	0.0190546
2024-04-19 13:00:00	2072	21.5	0.0389942	1940.4	25.94	0.0184077
2024-04-19 13:30:00	2064	22.17	0.0383707	1936.2	26.62	0.0177011
2024-04-19 14:00:00	2055.8	22.8	0.0379315	1932.1	27.21	0.0169434
2024-04-19 14:30:00	2047.7	23.42	0.0374973	1928.8	27.71	0.0162181
2024-04-19 15:00:00	2039.7	23.97	0.0368978	1925	28.12	0.0157036
2024-04-19 15:30:00	2032.1	24.46	0.036141	1921.9	28.48	0.0150314
2024-04-19 16:00:00	2025.1	24.75	0.0358096	1918.9	28.69	0.0145881
2024-04-19 16:30:00	2019	24.92	0.0349945	1915.9	28.67	0.0138995
2024-04-19 17:00:00	2013.4	25	0.034914	1913.3	28.51	0.013366
2024-04-19 17:30:00	2008.5	24.96	0.0342768	1910.9	28.12	0.0129718
2024-04-19 18:00:00	2003.9	24.79	0.0339625	1908.7	27.7	0.0126765
2024-04-19 18:30:00	1999.6	24.58	0.0337287	1906.9	27.29	0.012106
2024-04-19 19:00:00	1996.8	24.24	0.0334195	1905.5	26.67	0.011995
2024-04-19 19:30:00	1995.1	23.79	0.033266	1904.2	25.83	0.011995
2024-04-19 20:00:00	1994.1	23.22	0.033037	1903.2	24.76	0.0119674
2024-04-19 20:30:00	1993.3	22.58	0.033037	1902.3	23.66	0.0119399
2024-04-19 21:00:00	1993.4	21.88	0.0325837	1901.9	22.4	0.0117761
2024-04-19 21:30:00	1993	21.36	0.0322107	1901.3	21.5	0.0119124
2024-04-19 22:00:00	1993.3	20.82	0.0322849	1900.6	20.65	0.0116413
2024-04-19 22:30:00	1993.2	20.27	0.0320627	1900.6	20	0.0118032
2024-04-19 23:00:00	1993.1	19.82	0.031989	1900.3	19.5	0.0118577
2024-04-19 23:30:00	1993.7	19.42	0.031989	1900.2	19.05	0.011272
2024-04-20	1993.5	19.08	0.031989	1899.9	18.64	0.011722
2024-04-20 00:30:00	1993	18.75	0.0317687	1899.6	18.27	0.011324
2024-04-20 01:00:00	1993	18.5	0.0316957	1899.6	18.01	0.0116413
2024-04-20 01:30:00	1993	18.34	0.0310456	1899.2	17.86	0.0111944
2024-04-20 02:00:00	1993.2	18.18	0.0311889	1899.4	17.72	0.0110917
2024-04-20 02:30:00	1993.1	18.05	0.0310456	1899.1	17.6	0.0111429
2024-04-20 03:00:00	1992.7	17.9	0.0310456	1898.8	17.44	0.0110408
2024-04-20 03:30:00	1992.8	17.77	0.0309742	1898.7	17.33	0.0110408
2024-04-20 04:00:00	1992.7	17.65	0.0309742	1898.5	17.22	0.0111429
2024-04-20 04:30:00	1992.2	17.6	0.0309742	1898.3	17.61	0.0109648
2024-04-20 05:00:00	1991.7	17.55	0.030903	1897.8	17.61	0.0109396
2024-04-20 05:30:00	1991.6	17.49	0.0309742	1897.4	17.77	0.0109648
2024-04-20 06:00:00	1991.5	17.4	0.0309742	1897.1	17.72	0.0108393
2024-04-20 06:30:00	1990.8	17.35	0.030761	1896.7	17.86	0.0106905
2024-04-20 07:00:00	1990.3	17.3	0.0306902	1896.4	17.87	0.0107399
2024-04-20 07:30:00	1989.1	17.36	0.0302691	1895.9	18.21	0.0103992
2024-04-20 08:00:00	1988	17.6	0.0299916	1895	19.32	0.0105682
2024-04-20 08:30:00	1985.2	17.6	0.0299916	1894.1	21.5	0.0106905
2024-04-20 09:00:00	1982.4	17.54	0.0299916	1893.8	23.24	0.0105925
2024-04-20 09:30:00	1979.3	17.86	0.0291072	1893.2	24.72	0.0102565
2024-04-20 10:00:00	1975.9	18.3	0.0289734	1892.3	24.11	0.0100231
2024-04-20 10:30:00	1972	18.93	0.0282488	1891.8	24.06	0.009977
2024-04-20 11:00:00	1967.8	19.77	0.0279898	1891.2	25.19	0.00946237
2024-04-20 11:30:00	1963.8	20.69	0.0274157	1890.3	25.97	0.00899498
2024-04-20 12:00:00	1960.3	21.59	0.0269774	1889	26.51	0.00866962
2024-04-20 12:30:00	1957.2	21.78	0.0267301	1887.7	26.05	0.00826038
2024-04-20 13:00:00	1954.2	21.83	0.0263027	1886.2	25.63	0.00843335
2024-04-20 13:30:00	1951.9	21.58	0.0260016	1884.8	24.69	0.00807235
2024-04-20 14:00:00	1950	21.27	0.0259418	1883.9	23.97	0.00799834
2024-04-20 14:30:00	1948.2	21.02	0.0254683	1882.8	23.47	0.00807235
2024-04-20 15:00:00	1946.8	20.83	0.0250611	1882.1	22.84	0.00787046
2024-04-20 15:30:00	1945.5	20.71	0.0250035	1881.2	22.4	0.00772681
2024-04-20 16:00:00	1944.1	20.7	0.0249459	1880.8	22.43	0.0076913
2024-04-20 16:30:00	1942.6	20.84	0.0247172	1880.7	23.05	0.00729458
2024-04-20 17:00:00	1941	20.9	0.0242661	1879.6	22.91	0.00712853
2024-04-20 17:30:00	1940.1	20.8	0.0240436	1878.7	22.21	0.00726106
2024-04-20 18:00:00	1939.4	20.41	0.0239883	1878.1	21.74	0.00703072
2024-04-20 18:30:00	1937.9	20.08	0.0239332	1877.7	21.65	0.00699842
2024-04-20 19:00:00	1936.9	19.69	0.0238232	1877.5	21.14	0.00696627
2024-04-20 19:30:00	1936.4	19.34	0.0237137	1876.8	20.45	0.00699842
2024-04-20 20:00:00	1936.2	19.13	0.0230144	1876.5	20	0.00699842
2024-04-20 20:30:00	1935.7	19.05	0.0230144	1876.2	19.61	0.00693426
2024-04-20 21:00:00	1935.5	18.82	0.0230144	1875.8	19.05	0.00696627
2024-04-20 21:30:00	1935.6	18.54	0.0230144	1875.7	18.53	0.00699842
2024-04-20 22:00:00	1935.9	18.31	0.0230144	1875.4	18.19	0.00693426
2024-04-20 22:30:00	1935.9	18.14	0.0230144	1875.3	17.96	0.00683912
2024-04-20 23:00:00	1935.6	17.98	0.0230144	1875.2	17.76	0.00663743
2024-04-20 23:30:00	1935.9	17.82	0.0226464	1874.9	17.53	0.00669885
2024-04-21	1935.5	17.65	0.0229615	1874.9	17.4	0.00676083
2024-04-21 00:30:00	1935.5	17.6	0.022856	1874.6	17.4	0.00669885
2024-04-21 01:00:00	1935.3	17.55	0.0224905	1874.2	17.35	0.00683912
2024-04-21 01:30:00	1935	17.42	0.0222331	1874.2	17.27	0.00693426
2024-04-21 02:00:00	1934.8	17.4	0.0221309	1874.1	17.61	0.00693426
2024-04-21 02:30:00	1934.8	17.3	0.0224905	1873.8	17.77	0.00687068
2024-04-21 03:00:00	1934.7	17.18	0.02208	1873.6	17.75	0.00663743
2024-04-21 03:30:00	1934.4	17.1	0.0220293	1873.6	17.95	0.00666807
2024-04-21 04:00:00	1934.8	17.01	0.0219786	1873.4	17.85	0.00656145
2024-04-21 04:30:00	1934.2	16.97	0.0220293	1872.5	17.95	0.00636796
2024-04-21 05:00:00	1934.3	16.9	0.0219786	1872.7	17.96	0.00626614
2024-04-21 05:30:00	1934.4	16.85	0.0219786	1872.6	17.85	0.00609537
2024-04-21 06:00:00	1934.1	16.8	0.0218776	1872.6	17.92	0.00616595
2024-04-21 06:30:00	1933.7	16.75	0.0219786	1872.2	17.97	0.00603949
2024-04-21 07:00:00	1933.6	16.8	0.0218776	1872.1	18.1	0.00616595
2024-04-21 07:30:00	1933.2	16.86	0.0215774	1871.8	18.33	0.00599791
2024-04-21 08:00:00	1932	17.12	0.0211349	1871.5	19.06	0.00606736
2024-04-21 08:30:00	1931	17.3	0.0209894	1871.4	20.47	0.00639735
2024-04-21 09:00:00	1930.1	17.47	0.0209894	1871.2	21.46	0.00669885
2024-04-21 09:30:00	1929.1	17.79	0.0208449	1871.6	23.69	0.00647143
2024-04-21 10:00:00	1927.3	18.12	0.0201372	1871.8	24.45	0.00629506
2024-04-21 10:30:00	1925.9	18.43	0.0200447	1871.3	23.71	0.00636796
2024-04-21 11:00:00	1924.2	18.86	0.0199526	1871.2	23.84	0.00623735
2024-04-21 11:30:00	1922.9	19.35	0.0197697	1871.4	23.98	0.00603949
2024-04-21 12:00:00	1921.2	19.94	0.0191426	1871.3	24.38	0.00592925
2024-04-21 12:30:00	1919.8	20.6	0.0190108	1871	24.91	0.00572796
2024-04-21 13:00:00	1918.3	21.28	0.0188799	1870.4	25.48	0.00557186
2024-04-21 13:30:00	1917	21.94	0.0184077	1870.5	26.13	0.00516416
2024-04-21 14:00:00	1915.8	22.55	0.0179887	1870.5	26.69	0.00510505
2024-04-21 14:30:00	1914.4	23.15	0.0179887	1870	27.13	0.00500035
2024-04-21 15:00:00	1912.9	23.64	0.0177828	1869.5	27.46	0.00496592
2024-04-21 15:30:00	1911.8	24	0.0174181	1869.1	27.65	0.00479733
2024-04-21 16:00:00	1910.8	24.19	0.0169824	1868.7	27.88	0.00476431
2024-04-21 16:30:00	1909.6	24.2	0.0169824	1868	27.65	0.00466659
2024-04-21 17:00:00	1908.6	24.02	0.0169824	1867.5	27.06	0.00460257
2024-04-21 17:30:00	1908	23.76	0.0169044	1866.8	26.52	0.00416869
2024-04-21 18:00:00	1907.4	23.38	0.0164816	1866.3	25.86	0.00429536
2024-04-21 18:30:00	1906.5	22.89	0.0162555	1865.5	25.14	0.00436516
2024-04-21 19:00:00	1906.2	22.35	0.0163682	1865.1	24.33	0.00436516
2024-04-21 19:30:00	1905.6	21.75	0.0161808	1864.2	23.34	0.00436516
2024-04-21 20:00:00	1905.8	21.03	0.0160694	1863.7	22.19	0.00403645
2024-04-21 20:30:00	1905.3	20.39	0.0159956	1863.3	21.22	0.00419759
2024-04-21 21:00:00	1905.4	19.99	0.0159956	1863.4	20.45	0.00473151
2024-04-21 21:30:00	1905.2	19.58	0.0159956	1863.2	19.78	0.00473151
2024-04-21 22:00:00	1905.4	19.19	0.0159956	1863.2	19.28	0.00452898
2024-04-21 22:30:00	1905	18.84	0.0159588	1863	18.81	0.00446684
2024-04-21 23:00:00	1905.3	18.54	0.0159221	1862.8	18.45	0.00423643
2024-04-21 23:30:00	1905.4	18.24	0.0152757	1862.6	18.09	0.00429536
2024-04-22	1905.2	17.98	0.0157036	1862.4	17.78	0.00429536
2024-04-22 00:30:00	1905.1	17.82	0.0155239	1862.4	17.67	0.00413048
2024-04-22 01:00:00	1905.1	17.76	0.0150314	1862.7	17.86	0.00413048
2024-04-22 01:30:00	1904.8	17.61	0.0150314	1862.3	17.72	0.00423643
2024-04-22 02:00:00	1904.6	17.59	0.0149968	1862.4	17.84	0.00406443
2024-04-22 02:30:00	1904.4	17.5	0.0151008	1862.3	17.67	0.00406443
2024-04-22 03:00:00	1904	17.5	0.0150314	1862	17.85	0.00403645
2024-04-22 03:30:00	1904.2	17.39	0.0149624	1861.8	17.61	0.00399945
2024-04-22 04:00:00	1903.9	17.3	0.0149968	1861.6	17.52	0.00399945
2024-04-22 04:30:00	1903.7	17.3	0.0148936	1861.7	17.75	0.00410204
2024-04-22 05:00:00	1903.5	17.23	0.0147911	1861.6	17.57	0.00399945
2024-04-22 05:30:00	1903.5	17.2	0.0148594	1861.6	17.86	0.00399945
2024-04-22 06:00:00	1903.1	17.2	0.0144212	1861.5	17.75	0.00399945
2024-04-22 06:30:00	1903.1	17.2	0.0141906	1861.6	17.9	0.00399945
2024-04-22 07:00:00	1902.9	17.2	0.0142233	1861.3	18.09	0.00399945
2024-04-22 07:30:00	1902.5	17.32	0.0142889	1861.6	18.48	0.00399945
2024-04-22 08:00:00	1902.6	17.59	0.0142561	1862	19.7	0.00410204
2024-04-22 08:30:00	1901.9	17.63	0.0140929	1862.1	21.95	0.00433511
2024-04-22 09:00:00	1901.4	17.55	0.0138676	1862.4	23.29	0.00486407
2024-04-22 09:30:00	1901.1	17.9	0.0138676	1863.1	25.31	0.00479733
2024-04-22 10:00:00	1900.3	18.46	0.0135519	1863	25.71	0.00483059
2024-04-22 10:30:00	1884.3	18.81	0.010666	1850.6	24.97	0.00366438
2024-04-26 17:00:00	2109.8	25	0.32961	2086.4	24.83	0.306196
2024-04-26 17:30:00	2139.7	24.64	0.363078	2241.9	24.39	0.503501
2024-04-26 18:00:00	2159.7	24.57	0.395367	2265.2	23.99	0.486407
2024-04-26 18:30:00	2160.6	24.32	0.401791	2264.3	23.59	0.437522
2024-04-26 19:00:00	2159.4	23.78	0.399945	2262.4	23.11	0.402717
2024-04-26 19:30:00	2158.1	23.24	0.396278	2261.9	22.67	0.376704
2024-04-26 20:00:00	2156.7	22.86	0.391742	2261.4	22.32	0.356451
2024-04-26 20:30:00	2155.5	22.49	0.389045	2260.5	22.06	0.340408
2024-04-26 21:00:00	2154.4	21.61	0.38815	2260.3	21.59	0.328095
2024-04-26 21:30:00	2153.7	20.65	0.385478	2259.8	20.93	0.31842
2024-04-26 22:00:00	2153.4	19.95	0.382825	2259.5	20.31	0.309742
2024-04-26 22:30:00	2153.3	19.4	0.380189	2258.6	19.77	0.302691
2024-04-26 23:00:00	2153	18.91	0.377572	2258.1	19.31	0.295801
2024-04-26 23:30:00	2152.9	18.51	0.376704	2257.4	18.89	0.289734
2024-04-27	2152.3	18.2	0.37325	2257	18.53	0.285759
2024-04-27 00:30:00	2151.6	17.97	0.371535	2255.9	18.26	0.282488
2024-04-27 01:00:00	2151.8	17.76	0.368978	2254.8	18.01	0.279898
2024-04-27 01:30:00	2151.1	17.6	0.369828	2253.8	17.81	0.276694
2024-04-27 02:00:00	2150.9	17.45	0.369828	2252.9	17.64	0.275423
2024-04-27 02:30:00	2150.5	17.29	0.367282	2251.3	17.46	0.272898
2024-04-27 03:00:00	2150.3	17.14	0.366438	2250.4	17.31	0.271644
2024-04-27 03:30:00	2149.8	17.1	0.366438	2249.1	17.2	0.271644
2024-04-27 04:00:00	2149.3	17.06	0.366438	2247.8	17.2	0.270396
2024-04-27 04:30:00	2149	16.95	0.365595	2246.3	17.11	0.267917
2024-04-27 05:00:00	2148.7	16.9	0.363915	2244.8	17.1	0.265461
2024-04-27 05:30:00	2148.4	16.96	0.362243	2243.7	17.1	0.265461
2024-04-27 06:00:00	2148	16.9	0.36141	2242.2	17.1	0.266073
2024-04-27 06:30:00	2147.7	16.94	0.362243	2240.8	17.05	0.266686
2024-04-27 07:00:00	2147.2	17.46	0.360579	2239.5	17.23	0.264241
2024-04-27 07:30:00	2146	18.16	0.358096	2237.2	17.67	0.266073
2024-04-27 08:00:00	2144.8	18.84	0.358096	2234.8	18.13	0.266073
2024-04-27 08:30:00	2143.8	19.37	0.355631	2232.1	18.54	0.266686
2024-04-27 09:00:00	2142.4	19.84	0.356451	2229.4	18.95	0.266686
2024-04-27 09:30:00	2141.4	20.38	0.356451	2226.8	19.45	0.267917
2024-04-27 10:00:00	2140.2	21.01	0.355631	2223.7	20.11	0.267301
2024-04-27 10:30:00	2138.8	21.46	0.355631	2220.2	20.6	0.267917
2024-04-27 11:00:00	2137.4	21.72	0.355631	2217.6	20.94	0.269153
2024-04-27 11:30:00	2136.2	21.88	0.356451	2214.7	21.2	0.269153
2024-04-27 12:00:00	2135.2	22.2	0.354813	2211.8	21.48	0.271019
2024-04-27 12:30:00	2133.8	22.56	0.354813	2208.8	21.8	0.268534
2024-04-27 13:00:00	2132.7	22.61	0.354813	2205.9	21.92	0.269774
2024-04-27 13:30:00	2131.8	22.7	0.353997	2203.4	22.02	0.270396
2024-04-27 14:00:00	2131	22.76	0.352371	2200.8	22.1	0.269774
2024-04-27 14:30:00	2129.8	22.83	0.35156	2198.5	22.1	0.270396
2024-04-27 15:00:00	2128.9	22.9	0.350752	2196.4	22.19	0.270396
2024-04-27 15:30:00	2127.9	22.9	0.34914	2194.1	22.2	0.271019
2024-04-27 16:00:00	2126.9	22.9	0.348337	2191.7	22.2	0.271019
2024-04-27 16:30:00	2126.2	22.99	0.347536	2189.5	22.2	0.271644
2024-04-27 17:00:00	2126.5	23	0.345939	2189.6	22.26	0.272898
2024-04-27 17:30:00	2319.3	23.63	0.654636	2499.1	22.44	0.522396
2024-04-27 18:00:00	2318.4	23.52	0.606736	2513.1	22.57	0.397192
2024-04-27 18:30:00	2316.9	23.24	0.550808	2512.6	22.4	0.334195
2024-04-27 19:00:00	2316	22.92	0.514044	2507.8	22.14	0.304089
2024-04-27 19:30:00	2314	22.73	0.488652	2503.3	21.93	0.289068
2024-04-27 20:00:00	2312.4	22.52	0.469894	2499.3	21.75	0.279898
2024-04-27 20:30:00	2310.4	22.26	0.456037	2495.9	21.61	0.274157
2024-04-27 21:00:00	2309.3	21.48	0.447713	2493.3	21.25	0.270396
2024-04-27 21:30:00	2308.7	20.61	0.44157	2490.9	20.7	0.268534
2024-04-27 22:00:00	2308.4	19.93	0.435512	2489.8	20.18	0.267917
2024-04-27 22:30:00	2308	19.39	0.428549	2488.6	19.71	0.266686
2024-04-27 23:00:00	2307.6	18.98	0.425598	2487.4	19.32	0.267301
2024-04-27 23:30:00	2307	18.64	0.422669	2486.3	18.97	0.266686
2024-04-28	2306.3	18.3	0.419759	2485.3	18.66	0.266686
2024-04-28 00:30:00	2305.6	18.03	0.418794	2484.2	18.36	0.267917
2024-04-28 01:00:00	2304.5	17.86	0.415911	2483.1	18.16	0.268534
2024-04-28 01:30:00	2303.7	17.63	0.414	2481.9	17.95	0.268534
2024-04-28 02:00:00	2302.8	17.48	0.413048	2480.4	17.77	0.269153
2024-04-28 02:30:00	2301.6	17.37	0.413048	2479	17.65	0.269774
2024-04-28 03:00:00	2300.6	17.21	0.41115	2477.3	17.49	0.271019
2024-04-28 03:30:00	2299.6	17.1	0.409261	2476.2	17.34	0.271019
2024-04-28 04:00:00	2298.2	17.09	0.408319	2474.2	17.3	0.27227
2024-04-28 04:30:00	2297	17	0.409261	2472.6	17.22	0.273527
2024-04-28 05:00:00	2295.6	16.94	0.408319	2471.1	17.17	0.274789
2024-04-28 05:30:00	2294.5	16.85	0.405509	2469.8	17.07	0.274789
2024-04-28 06:00:00	2293.5	16.8	0.405509	2468	17	0.275423
2024-04-28 06:30:00	2292	16.83	0.403645	2466.2	17	0.276694
2024-04-28 07:00:00	2290	17.34	0.402717	2464.3	17.2	0.276058
2024-04-28 07:30:00	2286.7	18.02	0.400867	2461.7	17.61	0.277332
2024-04-28 08:00:00	2283.2	18.66	0.399945	2458.6	18.05	0.277332
2024-04-28 08:30:00	2279.7	19.21	0.397192	2455.7	18.48	0.278612
2024-04-28 09:00:00	2276.2	19.6	0.399025	2452.8	18.85	0.277332
2024-04-28 09:30:00	2272.8	19.94	0.399025	2448.9	19.21	0.280543
2024-04-28 10:00:00	2268.9	20.45	0.399025	2444.7	19.64	0.280543
2024-04-28 10:30:00	2265.1	20.94	0.398107	2440.1	20.12	0.283139
2024-04-28 11:00:00	2261.4	21.43	0.396278	2435.4	20.54	0.283139
2024-04-28 11:30:00	2257.1	22.04	0.396278	2430.1	21.04	0.284446
2024-04-28 12:00:00	2252.7	22.64	0.392645	2423.7	21.65	0.285759
2024-04-28 12:30:00	2248.1	23.14	0.394457	2418.1	22.14	0.285759
2024-04-28 13:00:00	2243.9	23.54	0.391742	2411.9	22.63	0.285759
2024-04-28 13:30:00	2240.2	23.67	0.390841	2405.9	23.02	0.286418
2024-04-28 14:00:00	2236.9	23.68	0.390841	2400.6	23.29	0.288403
2024-04-28 14:30:00	2234	23.8	0.389942	2396	23.36	0.289068
2024-04-28 15:00:00	2230.5	24.13	0.389942	2390.9	23.57	0.288403
2024-04-28 15:30:00	2227	24.27	0.389942	2386.2	23.7	0.28774
2024-04-28 16:00:00	2223.2	24.55	0.389942	2381.2	23.83	0.285759
2024-04-28 16:30:00	2219.4	24.78	0.38815	2375.5	23.99	0.289068
2024-04-28 17:00:00	2216.2	24.7	0.387258	2370	24	0.289734
2024-04-28 17:30:00	2213.2	24.6	0.383707	2364.8	23.94	0.289734
2024-04-28 18:00:00	2211	24.27	0.384592	2360.5	23.77	0.287078
2024-04-28 18:30:00	2209.2	23.88	0.381944	2356.8	23.4	0.289068
2024-04-28 19:00:00	2207.7	23.4	0.381944	2353.1	22.96	0.289068
2024-04-28 19:30:00	2206.4	23.02	0.380189	2350	22.54	0.287078
2024-04-28 20:00:00	2204.9	22.71	0.378443	2346.6	22.22	0.289068
2024-04-28 20:30:00	2203.2	22.39	0.376704	2343.7	21.94	0.287078
2024-04-28 21:00:00	2202	21.58	0.376704	2341.2	21.46	0.28774
2024-04-28 21:30:00	2202	20.68	0.375837	2339.6	20.85	0.285759
2024-04-28 22:00:00	2201.9	19.98	0.374111	2338.3	20.28	0.287078
2024-04-28 22:30:00	2201.4	19.43	0.372392	2336.9	19.77	0.286418
2024-04-28 23:00:00	2201.2	18.95	0.372392	2336.2	19.33	0.286418
2024-04-28 23:30:00	2200.7	18.57	0.370681	2334.9	18.94	0.285759
2024-04-29	2199.9	18.27	0.368978	2333.8	18.59	0.285759
2024-04-29 00:30:00	2199.1	18.01	0.366438	2332.5	18.3	0.284446
2024-04-29 01:00:00	2198.4	17.8	0.367282	2331.5	18.04	0.285102
2024-04-29 01:30:00	2197.9	17.64	0.367282	2329.6	17.85	0.282488
2024-04-29 02:00:00	2197.1	17.49	0.365595	2328.4	17.66	0.283792
2024-04-29 02:30:00	2196.4	17.33	0.363915	2327.7	17.5	0.287078
2024-04-29 03:00:00	2195.6	17.18	0.365595	2326.2	17.37	0.28774
2024-04-29 03:30:00	2195	17.09	0.364754	2325	17.29	0.28774
2024-04-29 04:00:00	2194.2	17	0.364754	2323.1	17.17	0.287078
2024-04-29 04:30:00	2193.6	16.95	0.363078	2322.3	17.08	0.28774
2024-04-29 05:00:00	2192.9	16.9	0.36141	2320.3	17	0.28774
2024-04-29 05:30:00	2192	16.87	0.36141	2319.8	16.9	0.288403
2024-04-29 06:00:00	2191.4	16.77	0.362243	2318.1	16.84	0.288403
2024-04-29 06:30:00	2190.8	16.73	0.360579	2316.7	16.75	0.289068
2024-04-29 07:00:00	2189.2	17.23	0.358922	2315	16.99	0.289068
2024-04-29 07:30:00	2186.7	17.86	0.358096	2312.6	17.42	0.285759
2024-04-29 08:00:00	2184.8	18.21	0.355631	2310.1	17.75	0.28774
2024-04-29 08:30:00	2182.8	18.67	0.357273	2307.5	18.11	0.287078
2024-04-29 09:00:00	2180.6	19.2	0.354813	2304.1	18.59	0.287078
2024-04-29 09:30:00	2177.8	19.6	0.354813	2300.4	19.01	0.287078
2024-04-29 10:00:00	2175.6	19.97	0.354813	2296.7	19.36	0.288403
2024-04-29 10:30:00	2173.1	20.49	0.354813	2292.8	19.79	0.288403
2024-04-29 11:00:00	2170.8	21.08	0.353183	2287.5	20.75	0.289068
2024-04-29 11:30:00	2168.4	21.4	0.352371	2281.1	21.82	0.289734
2024-04-29 12:00:00	2166.2	21.57	0.353183	2277.5	21.9	0.289068
2024-04-29 12:30:00	2163.9	22.03	0.35156	2274.2	22.12	0.289068
2024-04-29 13:00:00	2161.4	22.47	0.35156	2270.1	22.69	0.286418
2024-04-29 13:30:00	2159.8	22.88	0.349945	2265.6	23.23	0.286418
2024-04-29 14:00:00	2157.5	23.49	0.346737	2260.8	23.69	0.286418
2024-04-29 14:30:00	2155.1	23.82	0.346737	2256.7	23.8	0.285759
2024-04-29 15:00:00	2153.1	23.92	0.347536	2252.5	23.82	0.286418
2024-04-29 15:30:00	2151	23.98	0.347536	2249	23.9	0.285759
2024-04-29 16:00:00	2151.2	24.3	0.346737	2247.9	24.01	0.285759
2024-04-29 16:30:00	2167.4	24.88	0.363078	2266.2	24.27	0.300608
2024-04-29 17:00:00	2173.4	24.61	0.375837	2272.8	24.19	0.306902
2024-04-29 17:30:00	2174.5	24.56	0.376704	2273.4	24.1	0.306902
2024-04-29 18:00:00	2174.1	24.34	0.378443	2272.3	23.97	0.306196
2024-04-29 18:30:00	2173.5	23.92	0.375837	2270.7	23.62	0.302691
2024-04-29 19:00:00	2172.6	23.42	0.374111	2269.9	23.24	0.302691
2024-04-29 19:30:00	2171.9	23	0.370681	2267.9	22.88	0.299916
2024-04-29 20:00:00	2171.2	22.66	0.367282	2266.2	22.57	0.298538
2024-04-29 20:30:00	2170.6	22.24	0.367282	2265.8	22.25	0.297167
2024-04-29 21:00:00	2170.4	21.41	0.365595	2264.5	21.65	0.297852
2024-04-29 21:30:00	2170.6	20.54	0.363915	2264.5	20.85	0.296483
2024-04-29 22:00:00	2171.2	19.79	0.363078	2265.2	20.13	0.296483
2024-04-29 22:30:00	2171	19.21	0.36141	2265	19.5	0.295801
2024-04-29 23:00:00	2171.5	18.77	0.359749	2264.8	19.03	0.294442
2024-04-29 23:30:00	2171.6	18.41	0.359749	2265.4	18.65	0.294442
2024-04-30	2171.2	18.12	0.358096	2264.5	18.35	0.294442
2024-04-30 00:30:00	2171.2	17.9	0.358096	2263.7	18.12	0.293089
2024-04-30 01:00:00	2171	17.73	0.357273	2263.5	17.9	0.293089
2024-04-30 01:30:00	2170.9	17.58	0.356451	2262	17.78	0.293089
2024-04-30 02:00:00	2170.5	17.45	0.356451	2261.2	17.67	0.292415
2024-04-30 02:30:00	2170.4	17.3	0.354813	2260.3	17.54	0.293089
2024-04-30 03:00:00	2169.7	17.2	0.354813	2259.3	17.43	0.294442
2024-04-30 03:30:00	2169.8	17.15	0.355631	2258.6	17.4	0.294442
2024-04-30 04:00:00	2169.3	17.09	0.355631	2257.3	17.3	0.293765
2024-04-30 04:30:00	2168.8	17	0.355631	2256.3	17.29	0.293089
2024-04-30 05:00:00	2168.6	16.91	0.354813	2255.2	17.2	0.292415
2024-04-30 05:30:00	2168.4	16.89	0.354813	2254.1	17.12	0.293089
2024-04-30 06:00:00	2167.7	16.8	0.353183	2252.8	17.1	0.292415
2024-04-30 06:30:00	2167.5	16.83	0.353183	2251.7	17.1	0.293089
2024-04-30 07:00:00	2166.7	17.32	0.352371	2249.7	17.34	0.292415
2024-04-30 07:30:00	2165.1	17.82	0.35156	2247.7	17.69	0.292415
2024-04-30 08:00:00	2163.8	18.12	0.35156	2245.6	17.93	0.292415
2024-04-30 08:30:00	2163	18.43	0.35156	2243.6	18.13	0.291743
2024-04-30 09:00:00	2161.1	19.01	0.349945	2241	18.5	0.290402
2024-04-30 09:30:00	2159.2	19.76	0.34914	2238	19.16	0.291072
2024-04-30 10:00:00	2156.7	20.63	0.347536	2234.9	20.02	0.291072
2024-04-30 10:30:00	2154.3	21.41	0.34914	2230.6	20.99	0.291743
2024-04-30 11:00:00	2152.4	21.69	0.349945	2226.7	21.44	0.292415
2024-04-30 11:30:00	2150.7	21.93	0.349945	2223.5	21.69	0.291743
2024-04-30 12:00:00	2149.4	22.28	0.34914	2220.8	22.03	0.289734
2024-04-30 12:30:00	2147.6	22.5	0.349945	2217.3	22.48	0.291743
2024-04-30 13:00:00	2145.9	22.64	0.350752	2214.3	22.9	0.291743
2024-04-30 13:30:00	2146.2	22.99	0.34914	2216.1	23.15	0.290402
2024-04-30 14:00:00	2156.4	23.72	0.352371	2284.8	23.64	0.35156
2024-04-30 14:30:00	2172	23.9	0.376704	2310.3	23.8	0.376704
2024-04-30 15:00:00	2177.5	24.1	0.390841	2312.9	23.9	0.368129
2024-04-30 15:30:00	2177.2	24.2	0.39355	2310.7	24.06	0.363078
2024-04-30 16:00:00	2175.9	24.14	0.390841	2307.5	24.02	0.356451
2024-04-30 16:30:00	2174.1	24.45	0.386367	2304.9	24.02	0.352371
2024-04-30 17:00:00	2172.1	24.52	0.385478	2302.5	24	0.348337
2024-04-30 17:30:00	2170.1	24.48	0.385478	2300.3	24	0.346737
2024-04-30 18:00:00	2168.4	24.26	0.381944	2297.6	23.85	0.343558
2024-04-30 18:30:00	2166.9	23.94	0.381944	2296	23.53	0.342768
2024-04-30 19:00:00	2165.6	23.42	0.379315	2293.9	23.14	0.338844
2024-04-30 19:30:00	2164.8	23.04	0.377572	2292.6	22.82	0.338844
2024-04-30 20:00:00	2163.8	22.72	0.375837	2291.1	22.52	0.336512
2024-04-30 20:30:00	2163.4	22.35	0.372392	2289.7	22.25	0.334965
2024-04-30 21:00:00	2163.1	21.56	0.37325	2288.6	21.76	0.334195
2024-04-30 21:30:00	2162.9	20.69	0.371535	2288.5	21.03	0.334195
2024-04-30 22:00:00	2163.5	19.97	0.370681	2288.1	20.29	0.333426
2024-04-30 22:30:00	2163.8	19.44	0.368978	2288.8	19.68	0.331894
2024-04-30 23:00:00	2163.5	18.99	0.368129	2289	19.24	0.33266
2024-04-30 23:30:00	2163.7	18.65	0.367282	2288.8	18.86	0.32961
2024-05-01	2164.2	18.38	0.363915	2288.4	18.54	0.32961
2024-05-01 00:30:00	2163.6	18.12	0.366438	2287.7	18.28	0.328852
2024-05-01 01:00:00	2163.2	17.9	0.365595	2287.5	18.05	0.328852
2024-05-01 01:30:00	2163.3	17.74	0.364754	2286.7	17.88	0.328095
2024-05-01 02:00:00	2162.9	17.57	0.363078	2285.9	17.74	0.32961
2024-05-01 02:30:00	2162.6	17.45	0.364754	2285.2	17.61	0.331131
2024-05-01 03:00:00	2162.8	17.35	0.363915	2284.4	17.51	0.32961
2024-05-01 03:30:00	2162.4	17.24	0.363915	2283.3	17.41	0.32961
2024-05-01 04:00:00	2162.1	17.16	0.363915	2282.1	17.4	0.32961
2024-05-01 04:30:00	2161.8	17.1	0.363078	2281.3	17.3	0.32961
2024-05-01 05:00:00	2161.3	17.01	0.362243	2279.7	17.3	0.328852
2024-05-01 05:30:00	2161	16.94	0.362243	2278.8	17.2	0.328095
2024-05-01 06:00:00	2160.5	16.9	0.363078	2277.9	17.2	0.326588
2024-05-01 06:30:00	2160	16.92	0.362243	2276.4	17.16	0.325087
2024-05-01 07:00:00	2159.5	17.35	0.360579	2274.9	17.39	0.326588
2024-05-01 07:30:00	2158	17.96	0.359749	2272.8	17.8	0.327341
2024-05-01 08:00:00	2156.3	18.57	0.358096	2270.2	18.26	0.325087
2024-05-01 08:30:00	2155.2	19.09	0.357273	2267.6	18.75	0.323594
2024-05-01 09:00:00	2153.5	19.68	0.357273	2264.4	19.3	0.32434
2024-05-01 09:30:00	2151.4	20.32	0.356451	2260.8	19.87	0.323594
2024-05-01 10:00:00	2149	21.1	0.356451	2257.6	20.58	0.323594
2024-05-01 10:30:00	2146.7	21.71	0.356451	2253.8	21.3	0.325087
2024-05-01 11:00:00	2144.2	22.24	0.356451	2249.4	22	0.32434
2024-05-01 11:30:00	2142.3	22.66	0.355631	2244.6	22.5	0.322849
2024-05-01 12:00:00	2140.3	22.86	0.357273	2240.4	22.97	0.323594
2024-05-01 12:30:00	2138.4	23.02	0.356451	2236.5	23.3	0.323594
2024-05-01 13:00:00	2136.7	23.26	0.354813	2232.7	23.53	0.323594
2024-05-01 13:30:00	2135.4	23.45	0.353997	2229.4	23.7	0.322107
2024-05-01 14:00:00	2133.8	23.69	0.352371	2226.5	23.86	0.321366
2024-05-01 14:30:00	2131.9	23.89	0.35156	2222.8	23.98	0.31989
2024-05-01 15:00:00	2130.3	23.93	0.35156	2219.7	24.01	0.31842
2024-05-01 15:30:00	2128.6	24.07	0.350752	2216.2	24.1	0.316957
2024-05-01 16:00:00	2127.1	24.1	0.34914	2213.2	24.1	0.3155
2024-05-01 16:30:00	2125.5	24.21	0.34914	2210.6	24.1	0.312608
2024-05-01 17:00:00	2124	24.33	0.347536	2207.8	24.08	0.311889
2024-05-01 17:30:00	2123.1	24.18	0.346737	2204.9	24	0.311172
2024-05-01 18:00:00	2121.7	23.87	0.346737	2202.5	23.85	0.30903
2024-05-01 18:30:00	2121.1	23.33	0.347536	2200.6	23.44	0.30761
2024-05-01 19:00:00	2120.6	22.77	0.345144	2198.5	22.92	0.306196
2024-05-01 19:30:00	2120.5	22.4	0.34435	2197.1	22.48	0.302691
2024-05-01 20:00:00	2120.1	22.18	0.342768	2195.8	22.17	0.299226
2024-05-01 20:30:00	2119.7	21.95	0.340408	2194.6	21.9	0.299226
2024-05-01 21:00:00	2119.7	21.23	0.340408	2193.8	21.36	0.298538
2024-05-01 21:30:00	2120.1	20.39	0.339625	2193.1	20.6	0.297167
2024-05-01 22:00:00	2120.4	19.7	0.338065	2192.7	19.88	0.295801
2024-05-01 22:30:00	2120.2	19.27	0.337287	2192.2	19.37	0.295121
2024-05-01 23:00:00	2120.4	18.85	0.335738	2191.7	18.97	0.292415
2024-05-01 23:30:00	2120.5	18.54	0.335738	2191.2	18.64	0.293089
2024-05-02	2120.1	18.31	0.334965	2190.6	18.38	0.289734
2024-05-02 00:30:00	2120	18.1	0.333426	2189.9	18.14	0.291072
2024-05-02 01:00:00	2119.9	17.93	0.334195	2189.1	17.98	0.289734
2024-05-02 01:30:00	2119.8	17.77	0.33266	2188.4	17.85	0.290402
2024-05-02 02:00:00	2119.7	17.67	0.333426	2187.6	17.74	0.289068
2024-05-02 02:30:00	2119.7	17.6	0.33266	2187	17.64	0.289068
2024-05-02 03:00:00	2119.5	17.51	0.331894	2186.2	17.6	0.289068
2024-05-02 03:30:00	2119.4	17.44	0.331894	2185.3	17.6	0.289068
2024-05-02 04:00:00	2119.2	17.4	0.331131	2184.4	17.59	0.28774
2024-05-02 04:30:00	2119	17.38	0.331894	2183.8	17.55	0.28774
2024-05-02 05:00:00	2118.8	17.3	0.333426	2182.9	17.53	0.286418
2024-05-02 05:30:00	2118.5	17.27	0.33266	2182.1	17.5	0.285102
2024-05-02 06:00:00	2118.4	17.25	0.331894	2181.3	17.5	0.285102
2024-05-02 06:30:00	2118.2	17.23	0.331894	2180.4	17.52	0.284446
2024-05-02 07:00:00	2117.6	17.65	0.32961	2179.4	17.74	0.286418
2024-05-02 07:30:00	2116.9	18.17	0.32961	2177.7	18.13	0.285102
2024-05-02 08:00:00	2116	18.63	0.328852	2176.2	18.51	0.286418
2024-05-02 08:30:00	2115.2	19.06	0.33037	2174.5	18.9	0.286418
2024-05-02 09:00:00	2114.1	19.47	0.32961	2172.7	19.24	0.285759
2024-05-02 09:30:00	2113	20.01	0.32961	2170.9	19.72	0.286418
2024-05-02 10:00:00	2111.6	20.5	0.328852	2168.9	20.22	0.285759
2024-05-02 10:30:00	2110.3	21.07	0.328852	2166.7	20.81	0.286418
2024-05-02 11:00:00	2115.9	21.53	0.345144	2169.5	21.4	0.291072
1969-12-31 17:30:00	2193	21.49	0.412098	2242.6	21.66	0.341193
1969-12-31 18:00:00	2303.4	21.64	0.346737	2323.7	21.93	0.460257
1969-12-31 18:30:00	2305.5	22.29	0.28119	2315.8	22.34	0.457088
1969-12-31 19:00:00	2302.2	22.88	0.252348	2308.8	22.83	0.446684
1969-12-31 19:30:00	2297.9	23.31	0.235505	2302.7	23.23	0.439542
1969-12-31 20:00:00	2292.6	23.64	0.223357	2297.1	23.53	0.432514
1969-12-31 20:30:00	2287.5	23.79	0.215278	2291.6	23.72	0.427563
1969-12-31 21:00:00	2281.9	23.9	0.209411	2286.2	23.86	0.421697
1969-12-31 21:30:00	2276.9	23.94	0.204174	2281.4	23.92	0.418794
1969-12-31 22:00:00	2271.6	24	0.200447	2276.7	24	0.416869
1969-12-31 22:30:00	2266.5	24.11	0.197242	2272.5	24.04	0.41115
1969-12-31 23:00:00	2261.4	24.23	0.195884	2268.5	24.1	0.410204
1969-12-31 23:30:00	2257.1	24.2	0.194536	2264.5	24.1	0.40738
1970-01-01	2253.3	23.99	0.194536	2260.5	23.95	0.404576
1970-01-01 00:30:00	2249.5	23.66	0.193642	2256.4	23.63	0.401791
1970-01-01 01:00:00	2247	23.23	0.193642	2253	23.27	0.399025
1970-01-01 01:30:00	2244.7	22.85	0.192752	2250.5	22.9	0.394457
1970-01-01 02:00:00	2242.8	22.5	0.192752	2248.2	22.59	0.389942
1970-01-01 02:30:00	2241	22.17	0.192752	2246.8	22.31	0.389942
1970-01-01 03:00:00	2240.3	21.59	0.191867	2245.1	21.9	0.387258
1970-01-01 03:30:00	2239.8	20.91	0.192752	2244.2	21.35	0.386367
1970-01-01 04:00:00	2239.4	20.32	0.191867	2243.8	20.82	0.383707
1970-01-01 04:30:00	2239.1	19.82	0.191867	2243	20.29	0.382825
1970-01-01 05:00:00	2238.8	19.39	0.192309	2242.8	19.79	0.381066
1970-01-01 05:30:00	2238.4	19.04	0.193197	2242.4	19.38	0.380189
1970-01-01 06:00:00	2237.9	18.75	0.194089	2242.3	19.05	0.379315
1970-01-01 06:30:00	2237.6	18.46	0.194536	2241.5	18.73	0.375837
1970-01-01 07:00:00	2237	18.26	0.195434	2240.9	18.5	0.377572
1970-01-01 07:30:00	2236.3	18.06	0.195434	2240.4	18.29	0.375837
1970-01-01 08:00:00	2235.7	17.87	0.195884	2239.6	18.11	0.376704
1970-01-01 08:30:00	2234.9	17.75	0.196336	2238.7	17.95	0.374111
1970-01-01 09:00:00	2234.4	17.61	0.197697	2238.1	17.81	0.374973
1970-01-01 09:30:00	2233.5	17.53	0.198153	2237.3	17.76	0.372392
1970-01-01 10:00:00	2232.9	17.43	0.199526	2236.3	17.7	0.371535
1970-01-01 10:30:00	2232	17.37	0.199986	2235	17.63	0.372392
1970-01-01 11:00:00	2231.3	17.3	0.200909	2234.6	17.6	0.371535
1970-01-01 11:30:00	2230.3	17.26	0.201372	2232.9	17.6	0.370681
1970-01-01 12:00:00	2229.5	17.22	0.201837	2232.1	17.58	0.370681
1970-01-01 12:30:00	2228.5	17.22	0.202302	2231.1	17.57	0.369828
1970-01-01 13:00:00	2226.4	17.53	0.202302	2229.8	17.77	0.368978
1970-01-01 13:30:00	2224	18.04	0.202768	2227.8	18.15	0.366438
1970-01-01 14:00:00	2221.1	18.59	0.203704	2225.4	18.63	0.363915
1970-01-01 14:30:00	2218.2	19.08	0.203236	2222.9	19.09	0.363078
1970-01-01 15:00:00	2214.8	19.77	0.204644	2219.8	19.62	0.363915
1970-01-01 15:30:00	2210.5	20.39	0.206063	2306.4	20.3	0.44157
1970-01-01 16:00:00	2206.4	20.96	0.207014	2348.2	20.97	0.503501
1970-01-01 16:30:00	2202.3	21.55	0.206538	2344.5	21.51	0.490908
1970-01-01 17:00:00	2197.9	22.03	0.20797	2340.2	22.02	0.483059
1970-01-01 17:30:00	2194.6	22.34	0.209411	2335.4	22.52	0.475335
1970-01-01 18:00:00	2197.1	22.56	0.218776	2349.7	22.81	0.486407
1970-01-01 18:30:00	2268.3	22.38	0.282488	2407.8	22.92	0.54325
1970-01-01 19:00:00	2274.2	23.03	0.258821	2408.3	23.3	0.511682
1970-01-01 19:30:00	2272.4	23.16	0.254683	2405.5	23.43	0.503501
1970-01-01 20:00:00	2269.5	23.21	0.247172	2401.9	23.5	0.49204
1970-01-01 20:30:00	2266.9	23.34	0.242661	2398.4	23.54	0.486407
1970-01-01 21:00:00	2264.2	23.4	0.238232	2394.5	23.6	0.481948
1970-01-01 21:30:00	2262	23.36	0.236048	2390.3	23.56	0.47863
1970-01-01 22:00:00	2259.9	23.19	0.234423	2386.9	23.34	0.475335
1970-01-01 22:30:00	2258.1	23.1	0.232274	2383.6	23.16	0.473151
2024-05-03 17:00:00	2256.3	23.1	0.231739	2380.9	23.06	0.470977
2024-05-03 17:30:00	2255.3	23.02	0.229615	2378.1	23	0.472063
2024-05-03 18:00:00	2253.7	22.93	0.22856	2374.9	22.93	0.469894
2024-05-03 18:30:00	2252.3	22.72	0.229087	2371.8	22.78	0.468813
2024-05-03 19:00:00	2251.2	22.42	0.22856	2369.5	22.5	0.466659
2024-05-03 19:30:00	2250.3	22.24	0.22856	2366.5	22.27	0.466659
2024-05-03 20:00:00	2249.4	22.06	0.22856	2364	22.1	0.465586
2024-05-03 20:30:00	2248.7	21.89	0.229615	2362	21.92	0.463447
2024-05-03 21:00:00	2248.4	21.41	0.228034	2360.5	21.55	0.462381
2024-05-03 21:30:00	2248.8	20.77	0.229615	2360.3	21	0.461318
2024-05-03 22:00:00	2249.2	20.2	0.22856	2359.8	20.47	0.461318
2024-05-03 22:30:00	2249.5	19.69	0.229087	2360	19.98	0.459198
2024-05-03 23:00:00	2249.8	19.3	0.228034	2360	19.53	0.460257
2024-05-03 23:30:00	2249.9	18.93	0.228034	2359.8	19.15	0.459198
2024-05-04	2249.7	18.7	0.22856	2359.4	18.89	0.459198
2024-05-04 00:30:00	2249.7	18.44	0.22751	2358.9	18.65	0.459198
2024-05-04 01:00:00	2249.5	18.25	0.226986	2358	18.45	0.457088
2024-05-04 01:30:00	2249.4	18.09	0.22856	2357.1	18.29	0.459198
2024-05-04 02:00:00	2249.1	17.93	0.229615	2356	18.14	0.458142
2024-05-04 02:30:00	2248.7	17.83	0.229615	2355.1	18.06	0.457088
2024-05-04 03:00:00	2248.4	17.75	0.230144	2354.2	17.99	0.458142
2024-05-04 03:30:00	2248.1	17.66	0.231206	2353.1	17.9	0.458142
2024-05-04 04:00:00	2247.8	17.6	0.230675	2351.9	17.84	0.458142
2024-05-04 04:30:00	2247.5	17.46	0.230675	2350.8	17.8	0.457088
2024-05-04 05:00:00	2246.9	17.4	0.230675	2349.5	17.77	0.456037
2024-05-06 14:00:00	2234.1	22.27	0.293765	2228.4	22.89	0.422669
2024-05-06 14:30:00	2231.6	22.51	0.292415	2224.6	23.05	0.422669
2024-05-06 15:00:00	2228.5	22.66	0.294442	2220.2	23.13	0.419759
2024-05-07 07:30:00	2190.3	18	0.292415	2167	18.2	0.365595
2024-05-07 08:00:00	2188.6	18.34	0.291072	2165.6	18.48	0.363915
2024-05-07 08:30:00	2185.2	18.84	0.289068	2163.2	19.03	0.363078
2024-05-07 09:00:00	2181.4	19.31	0.290402	2160.4	19.57	0.362243
2024-05-07 09:30:00	2177.9	19.78	0.289068	2157.6	20.1	0.36141
2024-05-07 10:00:00	2173.8	20.42	0.288403	2153.7	20.76	0.359749
2024-05-07 10:30:00	2169.7	20.91	0.288403	2150.3	21.37	0.358096
2024-05-07 11:00:00	2166.3	21.31	0.288403	2147.1	21.96	0.358922
2024-05-07 11:30:00	2341.3	21.06	0.506991	2375.8	21.54	0.566239
2024-05-07 12:00:00	2365.7	21.15	0.488652	2420.8	21.9	0.465586
2024-05-07 12:30:00	2358.8	21.53	0.456037	2424	22.58	0.398107
2024-05-07 13:00:00	2353.5	21.87	0.439542	2422.2	23.04	0.368978
2024-05-07 13:30:00	2349.5	22.14	0.429536	2419.1	23.29	0.356451
2024-05-07 14:00:00	2346.2	22.27	0.423643	2415.7	23.32	0.350752
2024-05-07 14:30:00	2342.2	22.75	0.41783	2410.2	23.51	0.348337
2024-05-07 15:00:00	2337.7	23.07	0.414	2403.1	23.69	0.347536
2024-05-07 15:30:00	2334.4	23.15	0.412098	2397.1	23.82	0.346737
2024-05-07 16:00:00	2332.5	23.27	0.410204	2391.5	23.95	0.345939
2024-05-07 16:30:00	2330.2	23.3	0.408319	2386.7	24.03	0.345939
2024-05-07 17:00:00	2327.6	23.3	0.408319	2381.2	24.1	0.345939
2024-05-07 17:30:00	2326.7	23.19	0.406443	2377.3	24.02	0.345939
2024-05-07 18:00:00	2324.4	23.01	0.403645	2373.7	23.82	0.347536
2024-05-07 18:30:00	2322.5	22.78	0.403645	2369.6	23.49	0.348337
2024-05-07 19:00:00	2321.1	22.38	0.402717	2366.3	23.07	0.348337
2024-05-07 19:30:00	2319	22.06	0.398107	2362.9	22.71	0.346737
2024-05-07 20:00:00	2318.3	21.75	0.400867	2360.1	22.41	0.347536
2024-05-07 20:30:00	2317.5	21.43	0.397192	2357.4	22.17	0.346737
2024-05-07 21:00:00	2317.3	20.84	0.397192	2356.1	21.72	0.347536
2024-05-07 21:30:00	2317.6	20.16	0.396278	2356.2	21.06	0.346737
2024-05-07 22:00:00	2317.9	19.59	0.394457	2355.8	20.42	0.347536
2024-05-07 22:30:00	2318.4	19.15	0.395367	2355.9	19.86	0.347536
2024-05-07 23:00:00	2318.5	18.83	0.392645	2355.8	19.45	0.347536
2024-05-07 23:30:00	2318.8	18.53	0.391742	2355.6	19.08	0.347536
2024-05-08	2318.8	18.3	0.391742	2354.6	18.82	0.348337
2024-05-08 00:30:00	2318.7	18.14	0.390841	2354.1	18.62	0.348337
2024-05-08 01:00:00	2318.5	17.96	0.390841	2352.8	18.43	0.346737
2024-05-08 01:30:00	2318.5	17.84	0.38815	2352.2	18.26	0.34435
2024-05-08 02:00:00	2318.3	17.7	0.38815	2351.1	18.15	0.345144
2024-05-08 02:30:00	2318.1	17.57	0.387258	2349.6	18.02	0.348337
2024-05-08 03:00:00	2318	17.47	0.38815	2348.1	17.9	0.34914
2024-05-08 03:30:00	2317.6	17.39	0.389045	2346.9	17.82	0.350752
2024-05-08 04:00:00	2317.3	17.3	0.38815	2345.2	17.77	0.349945
2024-05-08 04:30:00	2316.8	17.21	0.386367	2343.5	17.7	0.35156
2024-05-08 05:00:00	2316.4	17.19	0.387258	2341.5	17.64	0.35156
2024-05-08 05:30:00	2315.8	17.1	0.387258	2339.3	17.6	0.35156
2024-05-08 06:00:00	2315.2	17.08	0.387258	2338	17.59	0.35156
2024-05-08 06:30:00	2314.6	17.01	0.385478	2335.7	17.5	0.352371
2024-05-08 07:00:00	2313	17.17	0.384592	2333.2	17.65	0.35156
2024-05-08 07:30:00	2310.8	17.47	0.383707	2329.6	17.93	0.349945
2024-05-08 08:00:00	2308.1	17.92	0.381944	2325.1	18.32	0.352371
2024-05-08 08:30:00	2305.1	18.41	0.381066	2319.3	18.81	0.35156
2024-05-08 09:00:00	2301.5	18.97	0.380189	2313	19.38	0.352371
2024-05-08 09:30:00	2297.6	19.5	0.379315	2306.5	19.98	0.353997
2024-05-08 10:00:00	2292.8	20.03	0.379315	2298.7	20.69	0.354813
2024-05-08 10:30:00	2288.4	20.44	0.378443	2288.9	21.37	0.356451
2024-05-08 11:00:00	2284.6	20.85	0.380189	2280.4	21.94	0.358922
2024-05-08 11:30:00	2280.8	21.24	0.379315	2272.7	22.34	0.358922
2024-05-08 12:00:00	2276.6	21.43	0.379315	2264.3	22.83	0.358922
2024-05-08 12:30:00	2272.8	21.51	0.377572	2255.1	23.22	0.360579
2024-05-08 13:00:00	2269.6	21.72	0.375837	2247.4	23.64	0.360579
2024-05-08 13:30:00	2265.4	21.9	0.375837	2238.4	23.88	0.360579
2024-05-08 14:00:00	2261.3	22.2	0.374973	2229.7	24.01	0.36141
2024-05-08 14:30:00	2256.7	22.51	0.374111	2222.2	24.17	0.36141
2024-05-08 15:00:00	2251.9	22.75	0.371535	2213.8	24.27	0.362243
2024-05-08 15:30:00	2247.2	23.14	0.370681	2206.4	24.44	0.362243
2024-05-08 16:00:00	2242.6	23.66	0.367282	2199.2	24.69	0.36141
2024-05-08 16:30:00	2238.2	23.8	0.366438	2193.1	24.9	0.360579
2024-05-08 17:00:00	2234.4	23.76	0.367282	2187	25.01	0.36141
2024-05-08 17:30:00	2231.1	23.7	0.366438	2183.2	25.05	0.360579
2024-05-08 18:00:00	2228.2	23.71	0.364754	2177.9	24.94	0.359749
2024-05-08 18:30:00	2224.8	23.8	0.362243	2173.5	24.9	0.358096
2024-05-08 19:00:00	2221.6	23.73	0.359749	2170.2	24.88	0.357273
2024-05-08 19:30:00	2219	23.48	0.360579	2167.1	24.72	0.354813
2024-05-08 20:00:00	2217.1	23.11	0.359749	2164.9	24.43	0.353183
2024-05-08 20:30:00	2215.5	22.64	0.358922	2162.7	23.97	0.35156
2024-05-08 21:00:00	2214.9	22.02	0.358096	2161.8	23.38	0.34914
2024-05-08 21:30:00	2214.6	21.38	0.356451	2161.4	22.77	0.345939
2024-05-08 22:00:00	2214.6	20.78	0.356451	2161.5	22.16	0.34435
2024-05-08 22:30:00	2214.5	20.27	0.355631	2161.4	21.58	0.341979
2024-05-08 23:00:00	2214.6	19.86	0.353997	2161.5	21.06	0.341193
2024-05-08 23:30:00	2214.7	19.51	0.353997	2161.7	20.59	0.339625
2024-05-09	2214.6	19.18	0.353183	2161.7	20.15	0.338065
2024-05-09 00:30:00	2214.4	18.87	0.353183	2161.9	19.73	0.338065
2024-05-09 01:00:00	2214.4	18.56	0.353183	2161.9	19.36	0.334965
2024-05-09 01:30:00	2214.4	18.32	0.352371	2161.9	18.99	0.336512
2024-05-09 02:00:00	2214.1	18.19	0.352371	2161.8	18.75	0.333426
2024-05-09 02:30:00	2213.7	17.99	0.35156	2161.5	18.52	0.334965
2024-05-09 03:00:00	2213.4	17.87	0.350752	2161.3	18.36	0.334195
2024-05-09 03:30:00	2213.2	17.72	0.35156	2160.9	18.19	0.334965
2024-05-09 04:00:00	2212.5	17.63	0.350752	2160.4	18.06	0.33266
2024-05-09 04:30:00	2212.3	17.56	0.34914	2159.6	17.97	0.331894
2024-05-09 05:00:00	2211.6	17.42	0.34914	2159	17.84	0.331894
2024-05-09 05:30:00	2211.1	17.36	0.34914	2158.1	17.77	0.331131
2024-05-09 06:00:00	2210.3	17.3	0.348337	2157.2	17.7	0.331894
2024-05-09 06:30:00	2209.6	17.3	0.347536	2156.2	17.7	0.331894
2024-05-09 07:00:00	2208.2	17.53	0.346737	2154.3	17.86	0.328852
2024-05-09 07:30:00	2205.6	18	0.345144	2151.5	18.26	0.328852
2024-05-09 08:00:00	2202.4	18.53	0.34435	2148.3	18.72	0.328095
2024-05-09 08:30:00	2198.3	18.85	0.342768	2144.7	19.12	0.328852
2024-05-09 09:00:00	2194.2	19.24	0.342768	2141.2	19.59	0.328095
2024-05-09 09:30:00	2190.2	19.73	0.341193	2137.3	20.17	0.327341
2024-05-09 10:00:00	2185.1	20.23	0.340408	2132.3	20.87	0.328095
2024-05-09 10:30:00	2186.7	20.84	0.346737	2129	21.79	0.328852
2024-05-09 11:00:00	2348.8	20.99	0.590201	2181.3	22.64	0.379315
2024-05-09 11:30:00	2345.3	21.27	0.552077	2205.4	23.22	0.409261
2024-05-09 12:00:00	2337.1	21.69	0.522396	2204.6	23.76	0.412098
2024-05-09 12:30:00	2330.6	22.09	0.508159	2199.6	24.21	0.409261
2024-05-09 13:00:00	2325.1	22.53	0.497737	2193.3	24.73	0.404576
2024-05-09 13:30:00	2320.5	23.05	0.49204	2187	25.17	0.399945
2024-05-09 14:00:00	2315.3	23.7	0.486407	2180	25.66	0.395367
2024-05-09 14:30:00	2310.8	24.41	0.483059	2172.9	26.36	0.389942
2024-05-09 15:00:00	2305.8	25.08	0.47863	2166.7	27.13	0.385478
2024-05-09 15:30:00	2300.6	25.8	0.475335	2160.2	27.78	0.381944
2024-05-09 16:00:00	2295.3	26.59	0.472063	2153.7	28.16	0.381944
2024-05-09 16:30:00	2290.8	27	0.468813	2148.3	28.41	0.380189
2024-05-09 17:00:00	2286.1	27.19	0.465586	2143.8	28.57	0.378443
2024-05-09 17:30:00	2281.2	27.2	0.465586	2140.8	28.67	0.375837
2024-05-09 18:00:00	2277.7	27.21	0.462381	2136.7	28.6	0.374111
2024-05-09 18:30:00	2273.9	27.37	0.456037	2133	28.61	0.372392
2024-05-09 19:00:00	2268.7	27.39	0.453942	2130.8	28.66	0.368978
2024-05-09 19:30:00	2265.2	27.22	0.450817	2128.3	28.55	0.368129
2024-05-09 20:00:00	2261.9	26.95	0.448745	2126.4	28.31	0.367282
2024-05-09 20:30:00	2258.7	26.56	0.444631	2125.5	27.93	0.364754
2024-05-09 21:00:00	2256.9	25.87	0.443609	2124.3	27.25	0.360579
2024-05-09 21:30:00	2255.5	25.08	0.440555	2124	26.37	0.358096
2024-05-09 22:00:00	2254.5	24.33	0.437522	2123.6	25.5	0.355631
2024-05-09 22:30:00	2252.9	23.65	0.435512	2123	24.7	0.352371
2024-05-09 23:00:00	2251.7	23.01	0.432514	2122.7	23.96	0.350752
2024-05-09 23:30:00	2250.8	22.43	0.430527	2122.3	23.29	0.348337
2024-05-10	2250.1	21.91	0.427563	2122.1	22.78	0.34435
2024-05-10 00:30:00	2249.4	21.48	0.42658	2121.9	22.37	0.342768
2024-05-10 01:00:00	2248.6	21.08	0.42462	2121.8	21.97	0.341193
2024-05-10 01:30:00	2247.9	20.66	0.421697	2121.9	21.53	0.339625
2024-05-10 02:00:00	2247.3	20.26	0.420727	2121.8	21.07	0.338065
2024-05-10 02:30:00	2246.9	19.88	0.418794	2121.8	20.64	0.337287
2024-05-10 03:00:00	2246.4	19.52	0.419759	2121.8	20.2	0.336512
2024-05-10 03:30:00	2245.7	19.19	0.41783	2121.6	19.77	0.334195
2024-05-10 04:00:00	2245.4	18.87	0.415911	2121.6	19.4	0.334195
2024-05-10 04:30:00	2245.3	18.54	0.415911	2121.4	19.04	0.331894
2024-05-10 05:00:00	2245	18.38	0.415911	2121.3	18.74	0.33266
2024-05-10 05:30:00	2244.3	18.2	0.413048	2120.8	18.53	0.33037
2024-05-10 06:00:00	2243.7	18.1	0.41115	2120.8	18.35	0.328095
2024-05-10 06:30:00	2243.3	18.02	0.41115	2120.5	18.25	0.32961
2024-05-10 07:00:00	2242.3	18.12	0.408319	2119.6	18.32	0.328095
2024-05-10 07:30:00	2240.1	18.51	0.40738	2118	18.71	0.325087
2024-05-10 08:00:00	2236.8	18.99	0.405509	2116	19.19	0.327341
2024-05-10 08:30:00	2233	19.39	0.404576	2113.7	19.62	0.326588
2024-05-10 09:00:00	2228.9	19.95	0.401791	2111	20.25	0.327341
2024-05-10 09:30:00	2224.2	20.63	0.399025	2107.7	21.12	0.326588
2024-05-10 10:00:00	2371.2	20.75	0.628058	2246.7	21.39	0.479733
2024-05-10 10:30:00	2460.9	20.79	0.653131	2378.2	21.9	0.57544
2024-05-10 11:00:00	2446.1	21.31	0.574116	2385.2	22.72	0.47863
2024-05-10 11:30:00	2438.4	21.73	0.544503	2383.5	23.31	0.421697
2024-05-10 12:00:00	2432.5	22.09	0.529663	2377.7	23.87	0.38815
2024-05-10 12:30:00	2428	22.44	0.5236	2369.7	24.4	0.368129
2024-05-10 13:00:00	2423.8	22.77	0.519996	2360.5	24.98	0.356451
2024-05-10 13:30:00	2420.2	23.18	0.5188	2351.3	25.34	0.349945
2024-05-10 14:00:00	2416.6	23.65	0.5188	2341.8	25.72	0.346737
2024-05-10 14:30:00	2412.8	24.15	0.517607	2332	26.24	0.345144
2024-05-10 15:00:00	2408.8	24.64	0.5188	2321.6	26.78	0.34435
2024-05-10 15:30:00	2405	25.15	0.516416	2311.1	27.27	0.341979
2024-05-10 16:00:00	2401.8	25.72	0.516416	2300.9	27.56	0.345144
2024-05-10 16:30:00	2398.1	25.9	0.516416	2292.5	27.68	0.345144
2024-05-10 17:00:00	2394.5	25.9	0.516416	2283.4	27.7	0.343558
2024-05-10 17:30:00	2391.1	25.83	0.517607	2275.4	27.62	0.345144
2024-05-10 18:00:00	2388.7	25.7	0.5188	2268.5	27.41	0.34435
2024-05-10 18:30:00	2385.8	25.7	0.517607	2261.4	27.3	0.341979
2024-05-10 19:00:00	2383	25.7	0.517607	2254.9	27.23	0.341979
2024-05-10 19:30:00	2380.4	25.56	0.517607	2249.6	27.06	0.340408
2024-05-10 20:00:00	2378.8	25.4	0.514044	2245	26.81	0.338844
2024-05-10 20:30:00	2377.2	25.2	0.515229	2241	26.53	0.337287
2024-05-10 21:00:00	2375.9	24.72	0.516416	2238.7	25.98	0.335738
2024-05-10 21:30:00	2374.7	23.99	0.516416	2237.4	25.19	0.334965
2024-05-10 22:00:00	2374.3	23.36	0.514044	2235.8	24.5	0.33266
2024-05-10 22:30:00	2373.3	22.86	0.512861	2234.8	23.9	0.331894
2024-05-10 23:00:00	2373.2	22.42	0.514044	2234.2	23.36	0.331131
2024-05-10 23:30:00	2372.4	22	0.511682	2233.9	22.82	0.331131
2024-05-11	2371.9	21.58	0.511682	2233.9	22.31	0.331894
2024-05-11 00:30:00	2371.5	21.16	0.511682	2233.4	21.83	0.33037
2024-05-11 01:00:00	2371.1	20.79	0.511682	2233	21.38	0.33037
2024-05-11 01:30:00	2370.7	20.44	0.508159	2232.7	20.97	0.33037
2024-05-11 02:00:00	2371	20.1	0.510505	2232.2	20.57	0.32961
2024-05-11 02:30:00	2370.6	19.75	0.509331	2232.1	20.16	0.32961
2024-05-11 03:00:00	2370.4	19.42	0.509331	2231.8	19.76	0.32961
2024-05-11 03:30:00	2370.2	19.09	0.504661	2231.7	19.4	0.327341
2024-05-11 04:00:00	2370.7	18.82	0.508159	2231.2	19.05	0.328852
2024-05-11 04:30:00	2370	18.68	0.508159	2230.3	18.82	0.328095
2024-05-11 05:00:00	2369.8	18.52	0.506991	2229.8	18.64	0.325837
2024-05-11 05:30:00	2369.1	18.35	0.505825	2229.2	18.44	0.328095
2024-05-11 06:00:00	2369	18.26	0.506991	2228.5	18.33	0.327341
2024-05-11 06:30:00	2368.5	18.11	0.508159	2227.2	18.21	0.328095
2024-05-11 07:00:00	2367.8	18.32	0.506991	2225.5	18.38	0.326588
2024-05-11 07:30:00	2366.4	18.71	0.505825	2222.2	18.82	0.325837
2024-05-11 08:00:00	2364	19.14	0.503501	2218.4	19.26	0.328095
2024-05-11 08:30:00	2361	19.47	0.505825	2213.6	19.67	0.326588
2024-05-11 09:00:00	2358.6	19.87	0.508159	2208.6	20.2	0.328852
2024-05-11 09:30:00	2355.3	20.32	0.508159	2202.4	20.83	0.327341
2024-05-11 10:00:00	2351.8	20.87	0.510505	2195.2	21.57	0.327341
2024-05-11 10:30:00	2348.9	21.35	0.511682	2187.8	22.32	0.327341
2024-05-11 11:00:00	2346.3	21.73	0.514044	2181.2	23.02	0.328095
2024-05-11 11:30:00	2342.7	22.15	0.514044	2175.4	23.73	0.326588
2024-05-11 12:00:00	2339.5	22.58	0.514044	2169.3	24.54	0.328095
2024-05-11 12:30:00	2336.4	22.97	0.516416	2163.2	25.12	0.327341
2024-05-11 13:00:00	2333.3	23.38	0.515229	2156	25.58	0.32961
2024-05-11 13:30:00	2329.7	23.8	0.516416	2150.8	25.85	0.33037
2024-05-11 14:00:00	2326	24.32	0.517607	2145	26.27	0.33037
2024-05-11 14:30:00	2321.7	24.91	0.517607	2140.2	26.79	0.331131
2024-05-11 15:00:00	2317.8	25.46	0.516416	2134.7	27.24	0.331894
2024-05-11 15:30:00	2312.9	26	0.516416	2130.1	27.73	0.33266
2024-05-11 16:00:00	2308.1	26.41	0.517607	2126	28.03	0.334195
2024-05-11 16:30:00	2304.4	26.5	0.517607	2122.9	28.16	0.335738
2024-05-11 17:00:00	2299.8	26.45	0.516416	2120.4	28.2	0.335738
2024-05-11 17:30:00	2296.2	26.37	0.512861	2118.1	28.14	0.334965
2024-05-11 18:00:00	2292.9	26.22	0.515229	2116.9	27.96	0.336512
2024-05-11 18:30:00	2289.7	26.25	0.512861	2115.3	27.9	0.338065
2024-05-11 19:00:00	2285.8	26.11	0.508159	2113.6	27.79	0.338844
2024-05-11 19:30:00	2320	25.77	0.562341	2113.1	27.59	0.338844
2024-05-11 20:00:00	2378.9	25.04	0.619441	2311.2	26.26	0.571479
2024-05-11 20:30:00	2370.4	24.65	0.58479	2356.6	25.14	0.582103
2024-05-11 21:00:00	2366.3	24	0.568853	2350.9	24.64	0.517607
2024-05-11 21:30:00	2364.5	23.4	0.562341	2349	24.1	0.47863
2024-05-11 22:00:00	2363.7	22.88	0.561048	2348.1	23.6	0.457088
2024-05-11 22:30:00	2363.4	22.4	0.557186	2347.9	23.09	0.442588
2024-05-11 23:00:00	2362.5	21.91	0.554626	2347.6	22.56	0.435512
2024-05-11 23:30:00	2361.5	21.43	0.552077	2347.6	22.05	0.429536
2024-05-12	2361.3	20.99	0.550808	2348.1	21.56	0.42658
2024-05-12 00:30:00	2360.5	20.62	0.548277	2348.4	21.11	0.423643
2024-05-12 01:00:00	2360.2	20.26	0.548277	2348.6	20.71	0.421697
2024-05-12 01:30:00	2360	19.92	0.548277	2348.7	20.32	0.419759
2024-05-12 02:00:00	2359.6	19.58	0.544503	2349	19.95	0.41783
2024-05-12 02:30:00	2359.4	19.25	0.545758	2349.1	19.57	0.419759
2024-05-12 03:00:00	2359.4	18.92	0.54325	2349.2	19.22	0.416869
2024-05-12 03:30:00	2359.3	18.75	0.54325	2349.5	18.93	0.41783
2024-05-12 04:00:00	2359.2	18.57	0.54325	2349.4	18.71	0.418794
2024-05-12 04:30:00	2358.9	18.4	0.542001	2349.2	18.48	0.41783
2024-05-12 05:00:00	2358.8	18.28	0.542001	2348.5	18.35	0.418794
2024-05-12 05:30:00	2358.3	18.18	0.54325	2348.3	18.22	0.419759
2024-05-12 06:00:00	2358	18.05	0.53827	2347.7	18.11	0.419759
2024-05-12 06:30:00	2357.5	18	0.53827	2347	18.01	0.419759
2024-05-12 07:00:00	2356.7	18.1	0.537032	2346.2	18.14	0.419759
2024-05-12 07:30:00	2355	18.41	0.53827	2344.3	18.48	0.418794
2024-05-12 08:00:00	2352.5	18.82	0.535797	2340.5	18.94	0.41783
2024-05-12 08:30:00	2350.1	19.15	0.535797	2336.1	19.38	0.419759
2024-05-12 09:00:00	2347.5	19.46	0.534564	2331.5	19.84	0.419759
2024-05-12 09:30:00	2344	19.92	0.535797	2326.2	20.4	0.423643
2024-05-12 10:00:00	2340	20.4	0.533335	2319.2	21.07	0.425598
2024-05-12 10:30:00	2380.9	20.71	0.595662	2338.4	21.64	0.447713
2024-05-12 11:00:00	2396.3	20.96	0.590201	2358.2	22.14	0.451856
2024-05-12 11:30:00	2389.7	21.31	0.572796	2354.1	22.61	0.44157
2024-05-12 12:00:00	2385.8	21.6	0.568853	2348.6	23.08	0.436516
2024-05-12 12:30:00	2382.2	21.74	0.567545	2342.2	23.43	0.438531
2024-05-12 13:00:00	2378.6	21.97	0.564937	2336.2	23.72	0.439542
2024-05-12 13:30:00	2375.1	22.28	0.562341	2329.1	24	0.442588
2024-05-12 14:00:00	2371.4	22.67	0.562341	2321.7	24.41	0.443609
2024-05-12 14:30:00	2367.6	23.09	0.561048	2314.8	24.84	0.446684
2024-05-12 15:00:00	2364	23.55	0.55847	2307.3	25.22	0.447713
2024-05-12 15:30:00	2360.5	24.08	0.559758	2299.6	25.71	0.446684
2024-05-12 16:00:00	2356.9	24.58	0.557186	2292.3	26.05	0.448745
2024-05-12 16:30:00	2352.5	24.7	0.561048	2284.3	26.24	0.44978
2024-05-12 17:00:00	2348.9	24.79	0.559758	2276.8	26.37	0.448745
2024-05-12 17:30:00	2346.3	24.8	0.559758	2270	26.4	0.447713
2024-05-12 18:00:00	2344.1	24.7	0.559758	2264.3	26.29	0.448745
2024-05-12 18:30:00	2340.8	24.76	0.55847	2258.7	26.18	0.445656
2024-05-12 19:00:00	2337	24.62	0.555904	2253	26.01	0.443609
2024-05-12 19:30:00	2335.2	24.28	0.557186	2248.8	25.67	0.442588
2024-05-12 20:00:00	2332.4	23.84	0.554626	2244.5	25.19	0.440555
2024-05-12 20:30:00	2330.1	23.33	0.554626	2240.8	24.63	0.437522
2024-05-12 21:00:00	2329	22.81	0.554626	2239.1	24.02	0.433511
2024-05-12 21:30:00	2328.7	22.34	0.552077	2237.9	23.45	0.433511
2024-05-12 22:00:00	2328.3	21.88	0.55335	2236.6	22.88	0.431519
2024-05-12 22:30:00	2327.6	21.42	0.550808	2236.4	22.34	0.430527
2024-05-12 23:00:00	2327	20.98	0.550808	2235.4	21.8	0.429536
2024-05-12 23:30:00	2326.4	20.59	0.549541	2235.5	21.31	0.429536
2024-05-13	2326.1	20.24	0.548277	2234.6	20.86	0.428549
2024-05-13 00:30:00	2325.7	19.89	0.548277	2234.3	20.42	0.42658
2024-05-13 01:00:00	2324.9	19.55	0.545758	2234	20.01	0.42658
2024-05-13 01:30:00	2324.7	19.25	0.547016	2233.9	19.63	0.423643
2024-05-13 02:00:00	2324.4	18.99	0.544503	2233.2	19.32	0.423643
2024-05-13 02:30:00	2323.8	18.75	0.544503	2232.7	19.03	0.423643
2024-05-13 03:00:00	2323.7	18.55	0.544503	2232.4	18.76	0.421697
2024-05-13 03:30:00	2323.4	18.45	0.544503	2231.6	18.59	0.423643
2024-05-13 04:00:00	2323	18.26	0.54325	2231.1	18.42	0.422669
2024-05-13 04:30:00	2322.5	18.2	0.54325	2230.4	18.3	0.422669
2024-05-13 05:00:00	2322.1	18.1	0.539511	2229.5	18.17	0.421697
2024-05-13 05:30:00	2321.4	18	0.53827	2228.8	18.1	0.422669
2024-05-13 06:00:00	2321	17.9	0.539511	2227.9	18.01	0.420727
2024-05-13 06:30:00	2320.2	17.85	0.540754	2226.6	17.94	0.420727
2024-05-13 07:00:00	2318.9	18.05	0.537032	2224.9	18.12	0.419759
2024-05-13 07:30:00	2316.3	18.43	0.533335	2222.1	18.54	0.41783
2024-05-13 08:00:00	2312.8	18.85	0.529663	2218	19.01	0.415911
2024-05-13 08:30:00	2308.8	19.17	0.529663	2213.7	19.47	0.413048
2024-05-13 09:00:00	2305.2	19.52	0.52723	2208.8	19.97	0.413048
2024-05-13 09:30:00	2300.7	19.98	0.526017	2202.9	20.54	0.41115
2024-05-13 10:00:00	2295.4	20.42	0.5236	2196.7	21.18	0.406443
2024-05-13 10:30:00	2294.5	20.75	0.524807	2191.2	21.76	0.408319
2024-05-13 11:00:00	2415.4	20.51	0.701455	2212.5	22.14	0.427563
2024-05-13 11:30:00	2402.7	20.72	0.632412	2224.8	22.5	0.446684
2024-05-13 12:00:00	2396	21.13	0.61235	2223.7	22.86	0.44978
2024-05-13 12:30:00	2391.8	21.4	0.603949	2219.9	23.19	0.448745
2024-05-13 13:00:00	2388.1	21.61	0.601174	2215	23.47	0.445656
2024-05-13 13:30:00	2384.9	21.81	0.597035	2209.5	23.67	0.442588
2024-05-13 14:00:00	2380.6	22.08	0.594292	2203.9	23.95	0.436516
2024-05-13 14:30:00	2377.6	22.35	0.594292	2198.8	24.24	0.43451
2024-05-13 15:00:00	2373.7	22.68	0.591562	2193.1	24.6	0.431519
2024-05-13 15:30:00	2370.4	23.05	0.587489	2187.9	24.94	0.427563
2024-05-13 16:00:00	2366.9	23.48	0.590201	2182.5	25.09	0.42462
2024-05-13 16:30:00	2363.5	23.72	0.590201	2177.7	25.21	0.423643
2024-05-13 17:00:00	2360.6	23.85	0.588844	2172.3	25.38	0.420727
2024-05-13 17:30:00	2357	23.71	0.588844	2168.8	25.37	0.41783
2024-05-13 18:00:00	2354.5	23.54	0.587489	2165.2	25.18	0.414
2024-05-13 18:30:00	2352.1	23.53	0.58479	2161.4	25.01	0.410204
2024-05-13 19:00:00	2349.1	23.46	0.582103	2158.3	24.9	0.408319
2024-05-13 19:30:00	2346.9	23.22	0.583445	2156.2	24.64	0.405509
2024-05-13 20:00:00	2344.4	22.88	0.580764	2154.6	24.25	0.402717
2024-05-13 20:30:00	2343.1	22.49	0.580764	2153.3	23.77	0.399945
2024-05-13 21:00:00	2342.2	22.04	0.579429	2152.3	23.25	0.396278
2024-05-13 21:30:00	2341.6	21.58	0.582103	2151	22.67	0.391742
2024-05-13 22:00:00	2341.4	21.1	0.579429	2149.8	22.11	0.389942
2024-05-13 22:30:00	2340.6	20.68	0.578096	2149.2	21.56	0.38815
2024-05-13 23:00:00	2340.2	20.28	0.578096	2148.7	21.05	0.384592
2024-05-13 23:30:00	2339.8	19.9	0.57544	2148.2	20.56	0.382825
2024-05-14	2339.6	19.53	0.57544	2148	20.09	0.381066
2024-05-14 00:30:00	2339.1	19.16	0.571479	2147.6	19.62	0.379315
2024-05-14 01:00:00	2338.6	18.85	0.574116	2147.3	19.24	0.377572
2024-05-14 01:30:00	2338.2	18.6	0.571479	2147	18.91	0.376704
2024-05-14 02:00:00	2338.3	18.41	0.570164	2146.7	18.64	0.374111
2024-05-14 02:30:00	2337.9	18.37	0.571479	2146.2	18.48	0.374973
2024-05-14 03:00:00	2337.2	18.24	0.571479	2145.8	18.34	0.374973
2024-05-14 03:30:00	2337.1	18.14	0.570164	2145.4	18.24	0.372392
2024-05-14 04:00:00	2336.3	18.03	0.566239	2144.8	18.12	0.372392
2024-05-14 04:30:00	2335.9	17.96	0.566239	2144.2	18.08	0.372392
2024-05-14 05:00:00	2335.4	17.9	0.567545	2143.6	18	0.370681
2024-05-14 05:30:00	2334.8	17.8	0.568853	2143.1	17.91	0.370681
2024-05-14 06:00:00	2334.3	17.77	0.568853	2142.5	17.89	0.369828
2024-05-14 06:30:00	2333.7	17.73	0.567545	2141.6	17.83	0.369828
2024-05-14 07:00:00	2332.4	17.94	0.564937	2140.5	18.03	0.368129
2024-05-14 07:30:00	2330.1	18.27	0.562341	2138.7	18.43	0.365595
2024-05-14 08:00:00	2326.7	18.67	0.557186	2136.4	18.91	0.364754
2024-05-14 08:30:00	2323	19	0.55335	2133.4	19.38	0.364754
2024-05-14 09:00:00	2319.3	19.32	0.554626	2130.2	19.87	0.363915
2024-05-14 09:30:00	2315.2	19.74	0.550808	2126.5	20.44	0.363078
2024-05-14 10:00:00	2310.2	20.2	0.550808	2122.2	21.08	0.359749
2024-05-14 10:30:00	2304.8	20.51	0.550808	2118.5	21.64	0.36141
2024-05-14 11:00:00	2301.3	20.78	0.548277	2115.8	22.26	0.360579
2024-05-14 11:30:00	2297.6	21.06	0.545758	2113	22.67	0.359749
2024-05-14 12:00:00	2294	21.41	0.544503	2109.9	22.93	0.360579
2024-05-14 12:30:00	2289.7	21.6	0.54325	2106.8	23.17	0.358922
2024-05-14 13:00:00	2285.7	21.69	0.539511	2103.3	23.41	0.357273
2024-05-14 13:30:00	2288.8	21.8	0.549541	2100.8	23.64	0.356451
2024-05-14 14:00:00	2352.5	21.91	0.636796	2104	23.8	0.358922
2024-05-14 14:30:00	2344.7	22.09	0.601174	2110.7	23.96	0.365595
2024-05-14 15:00:00	2338.7	22.36	0.586138	2116.6	24.28	0.37325
2024-05-14 15:30:00	2334.9	22.72	0.579429	2119.9	24.7	0.378443
2024-05-14 16:00:00	2330	23.21	0.574116	2120.8	24.96	0.385478
2024-05-14 16:30:00	2326	23.4	0.571479	2120.4	25.12	0.38815
2024-05-14 17:00:00	2322.3	23.4	0.571479	2119.3	25.28	0.389045
2024-05-14 17:30:00	2318.7	23.4	0.570164	2118.5	25.3	0.389045
2024-05-14 18:00:00	2316	23.3	0.570164	2116.9	25.16	0.389942
2024-05-14 18:30:00	2313.3	23.42	0.568853	2115.3	25.1	0.38815
2024-05-14 19:00:00	2309.3	23.41	0.563638	2114.4	25.08	0.387258
2024-05-14 19:30:00	2306.8	23.24	0.562341	2113.1	24.92	0.384592
2024-05-14 20:00:00	2303.9	23.01	0.563638	2111.9	24.64	0.382825
2024-05-14 20:30:00	2302	22.69	0.559758	2110.9	24.26	0.379315
2024-05-14 21:00:00	2301.1	22.3	0.561048	2110.1	23.76	0.379315
2024-05-14 21:30:00	2300.3	21.95	0.55847	2109.6	23.27	0.376704
2024-05-14 22:00:00	2300	21.63	0.561048	2109.3	22.81	0.375837
2024-05-14 22:30:00	2299	21.33	0.559758	2109.1	22.37	0.374111
2024-05-14 23:00:00	2298.1	21.04	0.557186	2108.7	21.98	0.372392
2024-05-14 23:30:00	2297.2	20.77	0.557186	2108.6	21.59	0.370681
2024-05-15	2296.5	20.49	0.555904	2108.5	21.2	0.369828
2024-05-15 00:30:00	2295.9	20.23	0.555904	2108.2	20.84	0.369828
2024-05-15 01:00:00	2295.3	20.02	0.554626	2108	20.52	0.368129
2024-05-15 01:30:00	2294.9	19.84	0.552077	2107.8	20.25	0.364754
2024-05-15 02:00:00	2294.3	19.66	0.55335	2107.8	20	0.365595
2024-05-15 02:30:00	2293.9	19.47	0.548277	2107.4	19.75	0.364754
2024-05-15 03:00:00	2293.3	19.22	0.549541	2107.3	19.49	0.364754
2024-05-15 03:30:00	2292.8	18.96	0.550808	2107.2	19.19	0.362243
2024-05-15 04:00:00	2292.4	18.69	0.548277	2107.1	18.89	0.362243
2024-05-15 04:30:00	2292	18.57	0.548277	2107.2	18.67	0.362243
2024-05-15 05:00:00	2291.5	18.4	0.547016	2107.1	18.5	0.362243
2024-05-15 05:30:00	2291	18.23	0.545758	2107	18.32	0.360579
2024-05-15 06:00:00	2290.5	18.12	0.545758	2106.8	18.2	0.358922
2024-05-15 06:30:00	2289.9	18	0.54325	2106.7	18.1	0.360579
2024-05-15 07:00:00	2288.6	18.16	0.540754	2106.3	18.2	0.358922
2024-05-15 07:30:00	2285.9	18.49	0.537032	2105.4	18.56	0.357273
2024-05-15 08:00:00	2282.4	18.89	0.533335	2104.3	19.04	0.358096
2024-05-15 08:30:00	2278.3	19.18	0.532108	2102.7	19.5	0.357273
2024-05-15 09:00:00	2274.1	19.5	0.52723	2100.9	19.99	0.355631
2024-05-15 09:30:00	2269.1	19.98	0.521195	2098.6	20.59	0.355631
2024-05-15 10:00:00	2263.3	20.41	0.517607	2095.7	21.25	0.354813
2024-05-15 10:30:00	2257.8	20.68	0.514044	2093.1	21.84	0.353997
2024-05-15 11:00:00	2253.4	20.91	0.510505	2091	22.46	0.353997
2024-05-15 11:30:00	2249.2	21.18	0.508159	2088.7	22.97	0.353183
2024-05-15 12:00:00	2258	21.49	0.521195	2126.8	23.27	0.392645
2024-05-15 12:30:00	2552.2	20.81	0.758578	2309.2	22.85	0.676083
2024-05-15 13:00:00	2531.1	21.02	0.576766	2305.9	23.08	0.677642
2024-05-15 13:30:00	2524	21.45	0.567545	2298.8	23.42	0.642688
2024-05-15 14:00:00	2518.3	21.84	0.564937	2293.3	23.77	0.619441
2024-05-15 14:30:00	2512.9	22.17	0.566239	2289	24.15	0.606736
2024-05-15 15:00:00	2507.2	22.53	0.568853	2285.1	24.53	0.598412
2024-05-15 15:30:00	2501.3	23.03	0.572796	2280.8	24.99	0.595662
2024-05-15 16:00:00	2496	23.48	0.576766	2276.1	25.37	0.594292
2024-05-15 16:30:00	2490.9	23.73	0.582103	2271.5	25.67	0.592925
2024-05-15 17:00:00	2486.4	23.89	0.588844	2266.6	25.95	0.590201
2024-05-15 17:30:00	2482.5	24.07	0.595662	2261.9	26.15	0.588844
2024-05-15 18:00:00	2478.1	24.35	0.601174	2257.4	26.39	0.590201
2024-05-15 18:30:00	2473.9	24.65	0.609537	2253	26.57	0.588844
2024-05-15 19:00:00	2470.1	24.66	0.61235	2248.3	26.55	0.586138
2024-05-15 19:30:00	2467.5	24.43	0.619441	2244.8	26.32	0.58479
2024-05-15 20:00:00	2465.4	24.15	0.6223	2242	25.95	0.583445
2024-05-15 20:30:00	2463.2	23.79	0.625173	2239.1	25.47	0.580764
2024-05-15 21:00:00	2462.3	23.28	0.629506	2236.1	24.84	0.578096
2024-05-15 21:30:00	2462.1	22.83	0.626614	2235	24.22	0.576766
2024-05-15 22:00:00	2462	22.42	0.629506	2234.3	23.63	0.574116
2024-05-15 22:30:00	2461.7	22.04	0.629506	2233.5	23.06	0.572796
2024-05-15 23:00:00	2461.4	21.65	0.628058	2233.1	22.53	0.570164
2024-05-15 23:30:00	2461.2	21.27	0.630957	2232.5	22.03	0.570164
2024-05-16	2461.6	20.92	0.629506	2231.9	21.55	0.570164
2024-05-16 00:30:00	2461.5	20.59	0.630957	2231.8	21.11	0.567545
2024-05-16 01:00:00	2461.5	20.27	0.625173	2231	20.69	0.566239
2024-05-16 01:30:00	2461.3	19.96	0.629506	2230.9	20.28	0.566239
2024-05-16 02:00:00	2461.5	19.64	0.628058	2230.4	19.88	0.564937
2024-05-16 02:30:00	2461.9	19.34	0.629506	2229.7	19.5	0.564937
2024-05-16 03:00:00	2461.9	19.05	0.629506	2229.6	19.15	0.562341
2024-05-16 03:30:00	2461.7	18.89	0.628058	2229.3	18.95	0.561048
2024-05-16 04:00:00	2461.5	18.69	0.629506	2228.6	18.73	0.561048
2024-05-16 04:30:00	2461.7	18.52	0.625173	2228.2	18.54	0.555904
2024-05-16 05:00:00	2461.6	18.35	0.629506	2227.7	18.36	0.55847
2024-05-16 05:30:00	2461.6	18.21	0.629506	2227	18.22	0.559758
2024-05-16 06:00:00	2460.9	18.1	0.629506	2226.1	18.12	0.557186
2024-05-16 06:30:00	2460.8	18	0.629506	2225.1	18.03	0.554626
2024-05-16 07:00:00	2459.5	18.05	0.629506	2224	18.06	0.55335
2024-05-16 07:30:00	2457.3	18.32	0.629506	2222.1	18.33	0.549541
2024-05-16 08:00:00	2455	18.67	0.630957	2218.8	18.78	0.552077
2024-05-16 08:30:00	2451.5	18.91	0.63387	2215.1	19.26	0.545758
2024-05-16 09:00:00	2448.8	19.26	0.639735	2210.5	19.75	0.54325
2024-05-16 09:30:00	2444.3	19.68	0.644169	2205.7	20.31	0.54325
2024-05-16 10:00:00	2457.6	20.11	0.659174	2232.2	20.87	0.55847
2024-05-16 10:30:00	2570	20.04	0.508159	2382.7	21.04	0.78886
2024-05-16 11:00:00	2562.7	20.25	0.472063	2374.2	21.54	0.76913
2024-05-16 11:30:00	2557.7	20.56	0.473151	2367.9	22.08	0.756833
2024-05-16 12:00:00	2553.2	20.91	0.475335	2363.6	22.45	0.751623
2024-05-16 12:30:00	2549.2	21.13	0.477529	2359.6	22.73	0.746449
2024-05-16 13:00:00	2545.1	21.34	0.480839	2356	23.02	0.74817
2024-05-16 13:30:00	2539.8	21.55	0.487528	2351.7	23.3	0.74817
2024-05-16 14:00:00	2534.7	21.77	0.490908	2347.2	23.61	0.746449
2024-05-16 14:30:00	2529.7	22	0.496592	2343.1	23.94	0.743019
2024-05-16 15:00:00	2524.6	22.27	0.501187	2338.8	24.24	0.743019
2024-05-16 15:30:00	2519.6	22.57	0.506991	2334.7	24.62	0.743019
2024-05-16 16:00:00	2514.4	22.84	0.511682	2330.7	24.99	0.74131
2024-05-16 16:30:00	2509.6	22.99	0.519996	2325.7	25.25	0.737904
2024-05-16 17:00:00	2505.8	23	0.526017	2320.9	25.4	0.734514
2024-05-16 17:30:00	2501.6	23	0.533335	2317	25.4	0.734514
2024-05-16 18:00:00	2497.3	23.11	0.539511	2311.8	25.4	0.729458
2024-05-16 18:30:00	2493.7	23.26	0.544503	2307.2	25.36	0.724436
2024-05-16 19:00:00	2490.6	23.06	0.552077	2302.5	25.15	0.721107
2024-05-16 19:30:00	2488.3	22.68	0.557186	2298.6	24.76	0.716143
2024-05-16 20:00:00	2486.6	22.29	0.559758	2295.6	24.25	0.712853
2024-05-16 20:30:00	2485.5	21.96	0.559758	2292.1	23.77	0.709578
2024-05-16 21:00:00	2485.1	21.61	0.562341	2289.8	23.26	0.707946
2024-05-16 21:30:00	2484.9	21.19	0.564937	2287.7	22.66	0.703072
2024-05-16 22:00:00	2485.2	20.82	0.564937	2285.4	22.08	0.699842
2024-05-16 22:30:00	2485.2	20.51	0.564937	2284.4	21.6	0.699842
2024-05-16 23:00:00	2485.1	20.27	0.564937	2283.3	21.19	0.696627
2024-05-16 23:30:00	2485	20.04	0.563638	2282.1	20.84	0.695024
2024-05-17	2485.3	19.82	0.562341	2281.2	20.52	0.691831
2024-05-17 00:30:00	2485.4	19.59	0.563638	2280.2	20.19	0.691831
2024-05-17 01:00:00	2485.8	19.35	0.561048	2279.2	19.86	0.69024
2024-05-17 01:30:00	2485.6	19.09	0.562341	2278.1	19.51	0.687068
2024-05-17 02:00:00	2485.8	18.84	0.564937	2276.7	19.18	0.687068
2024-05-17 02:30:00	2485.7	18.68	0.563638	2275.7	18.92	0.685488
2024-05-17 03:00:00	2485.6	18.46	0.561048	2275	18.68	0.685488
2024-05-17 03:30:00	2485.9	18.35	0.564937	2274.1	18.5	0.682339
2024-05-17 04:00:00	2485.5	18.21	0.563638	2273.5	18.33	0.680769
2024-05-17 04:30:00	2485	18.11	0.563638	2272	18.22	0.680769
2024-05-17 05:00:00	2485	17.99	0.564937	2270.8	18.1	0.680769
2024-05-17 05:30:00	2484.4	17.9	0.564937	2269.9	18.01	0.677642
2024-05-17 06:00:00	2484.1	17.8	0.566239	2268.6	17.94	0.672977
2024-05-17 06:30:00	2483.6	17.74	0.566239	2267.3	17.9	0.674528
2024-05-17 07:00:00	2482	17.88	0.566239	2266.2	18.02	0.672977
2024-05-17 07:30:00	2479.5	18.12	0.568853	2263.7	18.25	0.668344
2024-05-17 08:00:00	2476.6	18.43	0.572796	2260.1	18.6	0.662217
2024-05-17 08:30:00	2474	18.69	0.576766	2256.2	18.92	0.656145
2024-05-17 09:00:00	2469.8	19.07	0.582103	2251.4	19.36	0.65013
2024-05-17 09:30:00	2465	19.49	0.588844	2245.5	19.88	0.644169
2024-05-17 10:00:00	2459.6	19.9	0.598412	2239	20.39	0.636796
2024-05-17 10:30:00	2454.5	20.22	0.609537	2232.3	20.88	0.628058
2024-05-17 11:00:00	2449.6	20.49	0.616595	2225.7	21.48	0.618016
2024-05-17 11:30:00	2445.1	20.75	0.626614	2218.5	21.97	0.610942
2024-05-17 12:00:00	2441.5	20.96	0.63387	2212.3	22.31	0.605341
2024-05-17 12:30:00	2471.5	21.15	0.628058	2213.6	22.59	0.601174
2024-05-17 13:00:00	2509.1	21.29	0.552077	2238.9	22.82	0.629506
2024-05-17 13:30:00	2505	21.44	0.547016	2240.2	23.03	0.639735
2024-05-17 14:00:00	2500.5	21.63	0.548277	2234.9	23.3	0.635331
2024-05-17 14:30:00	2495.9	21.83	0.552077	2228.5	23.57	0.629506
2024-05-17 15:00:00	2491.1	22	0.554626	2221.4	23.8	0.619441
2024-05-17 15:30:00	2486.8	22.16	0.561048	2215.3	24.08	0.61235
2024-05-17 16:00:00	2482.6	22.3	0.567545	2209.2	24.3	0.603949
2024-05-17 16:30:00	2478.7	22.4	0.574116	2203	24.44	0.595662
2024-05-17 17:00:00	2475.2	22.43	0.579429	2195.6	24.55	0.58479
2024-05-17 17:30:00	2470.7	22.56	0.58479	2190.4	24.6	0.57544
2024-05-17 18:00:00	2466.2	22.6	0.590201	2184.7	24.56	0.567545
2024-05-17 18:30:00	2463.2	22.43	0.598412	2179.6	24.35	0.559758
2024-05-17 19:00:00	2461.3	22.08	0.601174	2175.4	23.91	0.552077
2024-05-17 19:30:00	2459.5	21.74	0.60256	2171.5	23.49	0.54325
2024-05-17 20:00:00	2457.8	21.46	0.606736	2167.6	23.13	0.537032
2024-05-17 20:30:00	2456.6	21.22	0.610942	2165	22.76	0.530884
2024-05-17 21:00:00	2456	20.9	0.613762	2162.2	22.32	0.524807
2024-05-17 21:30:00	2456	20.52	0.61235	2160.9	21.8	0.517607
2024-05-17 22:00:00	2456.1	20.13	0.61235	2159	21.24	0.514044
2024-05-17 22:30:00	2456.3	19.73	0.61235	2158	20.67	0.509331
2024-05-17 23:00:00	2456.8	19.36	0.610942	2157	20.14	0.505825
2024-05-17 23:30:00	2456.7	19.07	0.609537	2155.9	19.67	0.502343
2024-05-18	2456.5	18.84	0.608135	2155.1	19.34	0.500035
2024-05-18 00:30:00	2456.4	18.65	0.610942	2154.4	19.07	0.497737
2024-05-18 01:00:00	2456.5	18.45	0.608135	2153.6	18.82	0.493174
2024-05-18 01:30:00	2456.4	18.29	0.603949	2152.8	18.6	0.49204
2024-05-18 02:00:00	2456	18.13	0.608135	2152.2	18.41	0.489779
2024-05-18 02:30:00	2455.5	17.99	0.609537	2151.4	18.26	0.488652
2024-05-18 03:00:00	2455.8	17.9	0.608135	2150.7	18.12	0.484172
2024-05-18 03:30:00	2455.2	17.8	0.609537	2149.9	18.05	0.484172
2024-05-18 04:00:00	2455.3	17.71	0.608135	2149.1	17.96	0.484172
2024-05-18 04:30:00	2454.9	17.6	0.606736	2148.4	17.9	0.483059
2024-05-18 05:00:00	2454.6	17.55	0.606736	2147.5	17.82	0.479733
2024-05-18 05:30:00	2453.5	17.49	0.608135	2146.6	17.76	0.480839
2024-05-18 06:00:00	2453.7	17.4	0.609537	2146	17.7	0.47863
2024-05-18 06:30:00	2452.2	17.4	0.608135	2144.9	17.7	0.476431
2024-05-18 07:00:00	2450.7	17.55	0.609537	2144.1	17.88	0.475335
2024-05-18 07:30:00	2447.7	17.81	0.61235	2143	18.18	0.473151
2024-05-18 08:00:00	2445.4	18.05	0.613762	2141.7	18.48	0.470977
2024-05-18 08:30:00	2442.9	18.3	0.616595	2140.2	18.78	0.468813
2024-05-18 09:00:00	2438.5	18.57	0.623735	2138.4	19.13	0.464515
2024-05-18 09:30:00	2434.9	19.02	0.626614	2136.4	19.6	0.464515
2024-05-18 10:00:00	2429	19.48	0.632412	2133.8	20.18	0.458142
2024-05-18 10:30:00	2424.5	19.9	0.638263	2130.8	20.74	0.459198
2024-05-18 11:00:00	2420.2	20.25	0.647143	2127.9	21.19	0.457088
2024-05-18 11:30:00	2415.6	20.57	0.653131	2125	21.6	0.453942
2024-05-18 12:00:00	2410.8	20.89	0.657658	2121.8	22	0.448745
2024-05-18 12:30:00	2406.1	21.13	0.663743	2119	22.34	0.447713
2024-05-18 13:00:00	2401.4	21.34	0.671429	2116.2	22.63	0.443609
2024-05-18 13:30:00	2397.1	21.54	0.676083	2112.9	22.94	0.439542
2024-05-18 14:00:00	2392.6	21.73	0.679204	2110.3	23.21	0.436516
2024-05-18 14:30:00	2388.8	21.89	0.685488	2108.4	23.37	0.43451
2024-05-18 15:00:00	2385.8	22.05	0.685488	2106.7	23.48	0.433511
2024-05-18 15:30:00	2382.1	22.15	0.687068	2104.7	23.64	0.431519
2024-05-18 16:00:00	2378.6	22.23	0.691831	2102.7	23.7	0.430527
2024-05-18 16:30:00	2375.1	22.3	0.693426	2100.7	23.83	0.428549
2024-05-18 17:00:00	2371.2	22.4	0.695024	2098.6	24.04	0.42462
2024-05-18 17:30:00	2441.3	22.31	0.758578	2409.1	23.75	0.97051
2024-05-18 18:00:00	2618.2	21.32	0.477529	2517.6	23.02	1.25603
2024-05-18 18:30:00	2615.2	21.2	0.375837	2499.2	22.94	1.20504
2024-05-18 19:00:00	2611.8	21.07	0.366438	2490.2	22.76	1.18304
2024-05-18 19:30:00	2610.2	20.93	0.365595	2484.5	22.53	1.1695
2024-05-18 20:00:00	2609.3	20.84	0.363915	2479.3	22.31	1.15878
2024-05-18 20:30:00	2608.7	20.7	0.363915	2474.9	22.08	1.1508
2024-05-18 21:00:00	2608.7	20.39	0.36141	2470.8	21.71	1.14288
2024-05-18 21:30:00	2609.4	19.99	0.36141	2467.1	21.2	1.13501
2024-05-18 22:00:00	2610.3	19.6	0.358096	2464	20.66	1.1324
2024-05-18 22:30:00	2610.9	19.3	0.358096	2460.8	20.19	1.1272
2024-05-18 23:00:00	2611.6	19.01	0.353997	2458.5	19.77	1.12202
2024-05-18 23:30:00	2611.6	18.78	0.353997	2456.6	19.43	1.11686
2024-05-19	2612.6	18.56	0.35156	2454.9	19.15	1.11173
2024-05-19 00:30:00	2612.4	18.36	0.349945	2453.3	18.9	1.10917
2024-05-19 01:00:00	2612.5	18.22	0.349945	2451.6	18.68	1.10662
2024-05-19 01:30:00	2612.7	18.06	0.34914	2450.1	18.46	1.10154
2024-05-19 02:00:00	2612.7	17.94	0.345144	2447.8	18.34	1.09901
2024-05-19 02:30:00	2612.5	17.87	0.346737	2446.5	18.21	1.09648
2024-05-19 03:00:00	2612.2	17.8	0.345144	2444.7	18.11	1.09144
2024-05-19 03:30:00	2612	17.72	0.343558	2444.1	18.1	1.08893
2024-05-19 04:00:00	2611.5	17.68	0.339625	2442.6	18.07	1.08643
2024-05-19 04:30:00	2611.5	17.6	0.340408	2441.2	18	1.08643
2024-05-19 05:00:00	2610.7	17.57	0.341193	2439.8	18	1.08143
2024-05-19 05:30:00	2610.3	17.5	0.339625	2438.4	17.98	1.07647
2024-05-19 06:00:00	2609.9	17.44	0.337287	2437	17.9	1.07399
2024-05-19 06:30:00	2609.2	17.4	0.337287	2435.8	17.9	1.07152
2024-05-19 07:00:00	2607.2	17.5	0.336512	2434.6	17.96	1.06905
2024-05-19 07:30:00	2604.2	17.65	0.335738	2433.1	18.08	1.06414
2024-05-19 08:00:00	2600.9	17.83	0.338065	2430.9	18.26	1.05682
2024-05-19 08:30:00	2596.9	18.07	0.336512	2428.6	18.56	1.05196
2024-05-19 09:00:00	2591.4	18.43	0.339625	2424.9	19.03	1.03992
2024-05-19 09:30:00	2585.9	18.77	0.341193	2421.7	19.44	1.03039
2024-05-19 10:00:00	2580.4	19.1	0.343558	2418	19.78	1.02329
2024-05-19 10:30:00	2574.7	19.4	0.346737	2414.2	20.11	1.01625
2024-05-19 11:00:00	2568.8	19.69	0.346737	2410.7	20.47	1.00462
2024-05-19 11:30:00	2563.3	19.99	0.347536	2405.8	20.92	0.995405
2024-05-19 12:00:00	2557.2	20.27	0.35156	2400.3	21.32	0.984011
2024-05-19 12:30:00	2552.1	20.51	0.352371	2395.2	21.69	0.972747
2024-05-19 13:00:00	2548	20.69	0.352371	2390.8	21.93	0.963829
2024-05-19 13:30:00	2542.5	20.92	0.358096	2384.9	22.18	0.952796
2024-05-19 14:00:00	2537.4	21.23	0.358096	2378.9	22.53	0.939723
2024-05-19 14:30:00	2532.6	21.4	0.36141	2373.5	22.83	0.928966
2024-05-19 15:00:00	2528	21.4	0.360579	2368.3	22.88	0.922571
2024-05-19 15:30:00	2523.7	21.48	0.364754	2364.3	22.87	0.914113
2024-05-19 16:00:00	2519.7	21.67	0.368129	2358.5	23.06	0.901571
2024-05-19 16:30:00	2515.7	21.7	0.367282	2354	23.1	0.893305
2024-05-19 17:00:00	2512	21.74	0.37325	2349.1	23.12	0.887156
2024-05-19 17:30:00	2507.3	21.89	0.376704	2343.3	23.26	0.874984
2024-05-19 18:00:00	2501.9	21.9	0.381066	2336.1	23.37	0.862979
2024-05-19 18:30:00	2498.3	21.72	0.381066	2329.4	23.24	0.8531
2024-05-19 19:00:00	2495.9	21.39	0.384592	2324.1	22.94	0.845279
2024-05-19 19:30:00	2494	21.12	0.38815	2319.8	22.63	0.837529
2024-05-19 20:00:00	2491.6	20.92	0.38815	2315.9	22.4	0.829851
2024-05-19 20:30:00	2490.1	20.79	0.390841	2312.4	22.19	0.822243
2024-05-19 21:00:00	2489.4	20.56	0.392645	2309.7	21.89	0.814704
2024-05-19 21:30:00	2488.9	20.18	0.395367	2307.6	21.4	0.810961
2024-05-19 22:00:00	2489.5	19.78	0.390841	2305.6	20.85	0.807235
2024-05-19 22:30:00	2489.9	19.42	0.394457	2303.4	20.29	0.803526
2024-05-19 23:00:00	2490.1	19.14	0.395367	2302	19.8	0.801678
2024-05-19 23:30:00	2490.3	18.89	0.394457	2300.5	19.44	0.796159
2024-05-20	2490.2	18.66	0.394457	2298.5	19.11	0.792501
2024-05-20 00:30:00	2490.3	18.46	0.39355	2297	18.84	0.790679
2024-05-20 01:00:00	2490.4	18.28	0.395367	2295.8	18.59	0.787046
2024-05-20 01:30:00	2490.2	18.14	0.395367	2294.5	18.4	0.787046
2024-05-20 02:00:00	2489.9	18.01	0.396278	2293.1	18.25	0.78343
2024-05-20 02:30:00	2489.7	17.87	0.392645	2291.4	18.1	0.77983
2024-05-20 03:00:00	2489.3	17.78	0.391742	2290.1	17.97	0.776247
2024-05-20 03:30:00	2489.1	17.68	0.390841	2288.1	17.87	0.774462
2024-05-20 04:00:00	2488.7	17.6	0.39355	2287	17.8	0.770903
2024-05-20 04:30:00	2488.1	17.54	0.395367	2285.6	17.71	0.76913
2024-05-20 05:00:00	2487.7	17.5	0.395367	2284.1	17.67	0.765597
2024-05-20 05:30:00	2487.5	17.41	0.396278	2282.3	17.6	0.760326
2024-05-20 06:00:00	2486.2	17.4	0.396278	2280.9	17.6	0.758578
2024-05-20 06:30:00	2485.3	17.4	0.394457	2279.1	17.6	0.755092
2024-05-20 07:00:00	2483.3	17.4	0.397192	2277	17.62	0.746449
2024-05-20 07:30:00	2480.4	17.52	0.401791	2274.7	17.78	0.743019
2024-05-20 08:00:00	2476.8	17.72	0.40738	2271	18.09	0.734514
2024-05-20 08:30:00	2472.7	17.98	0.41115	2267.1	18.48	0.72778
2024-05-20 09:00:00	2467.6	18.32	0.414	2261.4	18.92	0.717794
2024-05-20 09:30:00	2462	18.73	0.419759	2255.8	19.4	0.707946
2024-05-20 10:00:00	2490.5	19.24	0.43451	2366.5	19.85	0.895365
2024-05-20 10:30:00	2548.3	19.67	0.416869	2390.8	20.31	0.97949
2024-05-20 11:00:00	2544	20.01	0.415911	2382.3	20.81	0.961612
2024-05-20 11:30:00	2540.5	20.33	0.415911	2377	21.23	0.952796
2024-05-20 12:00:00	2536.8	20.62	0.414954	2372.2	21.64	0.939723
2024-05-20 12:30:00	2533.5	20.84	0.416869	2367	22	0.928966
2024-05-20 13:00:00	2529.4	21.03	0.418794	2360.8	22.33	0.91622
2024-05-20 13:30:00	2524.6	21.24	0.415911	2353.5	22.67	0.901571
2024-05-20 14:00:00	2519.8	21.44	0.419759	2345.5	22.99	0.887156
2024-05-20 14:30:00	2514.7	21.66	0.420727	2337.5	23.32	0.870964
2024-05-20 15:00:00	2510.1	21.85	0.420727	2330	23.59	0.857038
2024-05-20 15:30:00	2504.7	21.94	0.422669	2322.2	23.73	0.843335
2024-05-20 16:00:00	2499.2	22.05	0.423643	2313.7	23.91	0.826038
2024-05-20 16:30:00	2494.7	22.14	0.42462	2304.6	24.09	0.807235
2024-05-20 17:00:00	2489	22.2	0.42658	2296.5	24.26	0.792501
2024-05-20 17:30:00	2484	22.23	0.427563	2287.7	24.3	0.774462
2024-05-20 18:00:00	2480.3	22.22	0.429536	2280.1	24.3	0.760326
2024-05-20 18:30:00	2476.5	22.08	0.430527	2272.7	24.15	0.746449
2024-05-20 19:00:00	2473.3	21.84	0.433511	2265.6	23.88	0.732825
2024-05-20 19:30:00	2470.6	21.5	0.435512	2259	23.5	0.721107
2024-05-20 20:00:00	2468.5	21.21	0.435512	2254	23.11	0.711214
2024-05-20 20:30:00	2466.4	21.05	0.435512	2249.9	22.75	0.701455
2024-05-20 21:00:00	2465.5	20.77	0.438531	2246.1	22.33	0.693426
2024-05-20 21:30:00	2465.4	20.39	0.438531	2243.2	21.8	0.687068
2024-05-20 22:00:00	2466	20.01	0.437522	2241.1	21.23	0.679204
2024-05-20 22:30:00	2466.1	19.64	0.437522	2239.2	20.66	0.674528
2024-05-20 23:00:00	2466.3	19.31	0.437522	2237.3	20.14	0.671429
2024-05-20 23:30:00	2466.8	19.06	0.438531	2236.1	19.7	0.666807
2024-05-21	2466.9	18.82	0.435512	2235	19.38	0.662217
2024-05-21 00:30:00	2466.9	18.62	0.436516	2233.6	19.08	0.659174
2024-05-21 01:00:00	2466.9	18.43	0.43451	2232.1	18.82	0.656145
2024-05-21 01:30:00	2466.9	18.29	0.43451	2231	18.63	0.653131
2024-05-21 02:00:00	2466.7	18.16	0.43451	2229.8	18.44	0.651628
2024-05-21 02:30:00	2466.1	18.04	0.436516	2228.5	18.28	0.648634
2024-05-21 03:00:00	2466.1	17.93	0.435512	2227.2	18.15	0.642688
2024-05-21 03:30:00	2465.4	17.81	0.435512	2226	18.06	0.642688
2024-05-21 04:00:00	2465	17.71	0.43451	2224.8	17.94	0.64121
2024-05-21 04:30:00	2464.4	17.67	0.435512	2223.5	17.9	0.635331
2024-05-21 05:00:00	2463.7	17.6	0.435512	2222.3	17.85	0.635331
2024-05-21 05:30:00	2463.6	17.57	0.435512	2220.6	17.8	0.632412
2024-05-21 06:00:00	2462.9	17.5	0.436516	2219.4	17.8	0.623735
2024-05-21 06:30:00	2461.9	17.48	0.436516	2217.8	17.75	0.626614
2024-05-21 07:00:00	2459.7	17.57	0.437522	2216.3	17.88	0.623735
2024-05-21 07:30:00	2456.4	17.78	0.438531	2213.7	18.15	0.619441
2024-05-21 08:00:00	2453.2	18.01	0.440555	2210.7	18.48	0.615177
2024-05-21 08:30:00	2448.8	18.21	0.443609	2206.8	18.8	0.608135
2024-05-21 09:00:00	2456.5	18.52	0.456037	2221.9	19.17	0.606736
2024-05-21 09:30:00	2549.2	18.54	0.43451	2347.6	19.27	0.837529
2024-05-21 10:00:00	2549	18.87	0.422669	2343.9	19.55	0.885116
2024-05-21 10:30:00	2547.4	19.35	0.423643	2338.2	20.05	0.874984
2024-05-21 11:00:00	2542.2	19.78	0.423643	2332.9	20.56	0.862979
2024-05-21 11:30:00	2536.8	20.16	0.42462	2326.5	21.04	0.851138
2024-05-21 12:00:00	2531.3	20.51	0.427563	2320.4	21.49	0.837529
2024-05-21 12:30:00	2526.2	20.81	0.428549	2313.5	21.87	0.824138
2024-05-21 13:00:00	2521.6	21.06	0.431519	2307	22.15	0.810961
2024-05-21 13:30:00	2517.8	21.26	0.430527	2301.7	22.35	0.797995
2024-05-21 14:00:00	2513.3	21.45	0.433511	2295.7	22.54	0.785236
2024-05-21 14:30:00	2509.4	21.57	0.43451	2289.8	22.64	0.774462
2024-05-21 15:00:00	2505.7	21.64	0.43451	2284.2	22.71	0.763836
2024-05-21 15:30:00	2502.3	21.75	0.436516	2278	22.82	0.753356
2024-05-21 16:00:00	2499	21.91	0.435512	2272.1	22.95	0.743019
2024-05-21 16:30:00	2495.7	22.07	0.439542	2265.6	23.13	0.731139
2024-05-21 17:00:00	2492.2	22.2	0.438531	2258.6	23.25	0.721107
2024-05-21 17:30:00	2489.4	22.29	0.440555	2253.9	23.3	0.712853
2024-05-21 18:00:00	2486.9	22.19	0.44157	2248.7	23.23	0.703072
2024-05-21 18:30:00	2485.1	21.91	0.440555	2244.4	22.93	0.693426
2024-05-21 19:00:00	2483.8	21.65	0.443609	2240.3	22.58	0.687068
2024-05-21 19:30:00	2482.4	21.45	0.442588	2236.9	22.29	0.679204
2024-05-21 20:00:00	2481	21.27	0.443609	2233.7	22.06	0.669885
2024-05-21 20:30:00	2479.5	21.14	0.443609	2231.1	21.86	0.665273
2024-05-21 21:00:00	2478.6	20.91	0.444631	2228.1	21.61	0.659174
2024-05-21 21:30:00	2478.5	20.56	0.445656	2226.4	21.22	0.653131
2024-05-21 22:00:00	2478.4	20.21	0.440555	2225.2	20.77	0.648634
2024-05-21 22:30:00	2478.9	19.86	0.444631	2223.4	20.33	0.644169
2024-05-21 23:00:00	2478.9	19.54	0.442588	2222.6	19.94	0.639735
2024-05-21 23:30:00	2479.1	19.25	0.442588	2221.1	19.57	0.638263
2024-05-22	2479.2	19.03	0.442588	2220	19.28	0.635331
2024-05-22 00:30:00	2479	18.83	0.440555	2219.1	19.07	0.630957
2024-05-22 01:00:00	2479.2	18.64	0.437522	2217.8	18.84	0.629506
2024-05-22 01:30:00	2479.1	18.51	0.437522	2217	18.67	0.626614
2024-05-22 02:00:00	2478.8	18.4	0.438531	2216.2	18.51	0.625173
2024-05-22 02:30:00	2478.5	18.3	0.439542	2215.1	18.44	0.623735
2024-05-22 03:00:00	2478.3	18.19	0.440555	2214	18.33	0.616595
2024-05-22 03:30:00	2477.8	18.08	0.439542	2213.1	18.24	0.619441
2024-05-22 04:00:00	2477.4	17.99	0.440555	2211.9	18.14	0.618016
2024-05-22 04:30:00	2477.1	17.9	0.440555	2210.8	18.04	0.609537
2024-05-22 05:00:00	2476.6	17.84	0.438531	2209.7	18	0.610942
2024-05-22 05:30:00	2475.9	17.8	0.438531	2208.5	18	0.609537
2024-05-22 06:00:00	2475.2	17.77	0.438531	2207.5	17.91	0.605341
2024-05-22 06:30:00	2474.7	17.7	0.439542	2206.1	17.9	0.60256
2024-05-22 07:00:00	2472.9	17.79	0.44157	2204.5	18.03	0.599791
2024-05-22 07:30:00	2470.2	18	0.440555	2201.9	18.32	0.595662
2024-05-22 08:00:00	2466.4	18.19	0.442588	2198.8	18.65	0.590201
2024-05-22 08:30:00	2463.3	18.35	0.446684	2195.1	18.9	0.586138
2024-05-22 09:00:00	2459.9	18.5	0.447713	2191.6	19.13	0.579429
2024-05-22 09:30:00	2455.5	18.85	0.450817	2187.5	19.52	0.572796
2024-05-22 10:00:00	2450.3	19.2	0.454988	2182.1	19.96	0.563638
2024-05-22 10:30:00	2445.3	19.48	0.460257	2177.2	20.31	0.557186
2024-05-22 11:00:00	2440.1	19.77	0.462381	2171.9	20.67	0.549541
2024-05-22 11:30:00	2435.8	19.96	0.468813	2167	20.92	0.540754
2024-05-22 12:00:00	2431.9	20.19	0.473151	2162.2	21.19	0.532108
2024-05-22 12:30:00	2480.7	20.5	0.484172	2169	21.53	0.528445
2024-05-22 13:00:00	2578.5	20.99	0.421697	2207.6	21.83	0.562341
2024-05-22 13:30:00	2574.9	21.06	0.414954	2213.1	22.07	0.599791
2024-05-22 14:00:00	2572.1	21.15	0.414954	2209.4	22.26	0.606736
2024-05-22 14:30:00	2568.8	21.26	0.412098	2204.2	22.43	0.60256
2024-05-22 15:00:00	2565.3	21.37	0.414	2198.5	22.6	0.599791
2024-05-22 15:30:00	2562	21.47	0.415911	2192.2	22.78	0.591562
2024-05-22 16:00:00	2557.9	21.5	0.418794	2186	22.9	0.583445
2024-05-22 16:30:00	2554.5	21.5	0.419759	2181.1	22.9	0.572796
2024-05-22 17:00:00	2551.8	21.5	0.420727	2176.4	22.9	0.564937
2024-05-22 17:30:00	2548.9	21.5	0.420727	2173	22.88	0.555904
2024-05-22 18:00:00	2546.7	21.46	0.419759	2169.8	22.77	0.549541
2024-05-22 18:30:00	2544.4	21.32	0.420727	2166.1	22.58	0.54325
2024-05-22 19:00:00	2542	21.14	0.418794	2163.5	22.31	0.537032
2024-05-22 19:30:00	2540.3	21.02	0.419759	2161.2	22.09	0.530884
2024-05-22 20:00:00	2538.8	20.87	0.420727	2159.4	21.85	0.526017
2024-05-22 20:30:00	2537.3	20.72	0.418794	2157.8	21.61	0.5188
2024-05-22 21:00:00	2536.2	20.43	0.420727	2156.1	21.26	0.514044
2024-05-22 21:30:00	2536.1	20.07	0.41783	2155.2	20.82	0.509331
2024-05-22 22:00:00	2535.9	19.74	0.41783	2154.1	20.38	0.504661
2024-05-22 22:30:00	2535.7	19.46	0.414	2153.1	19.98	0.502343
2024-05-22 23:00:00	2535.9	19.18	0.415911	2152.2	19.58	0.498884
2024-05-22 23:30:00	2536.3	18.98	0.412098	2151.5	19.28	0.49545
2024-05-23	2535.7	18.79	0.41115	2150.8	19.05	0.489779
2024-05-23 00:30:00	2535.7	18.63	0.41115	2150.1	18.84	0.488652
2024-05-23 01:00:00	2535.5	18.46	0.412098	2149.3	18.67	0.486407
2024-05-23 01:30:00	2535.3	18.35	0.410204	2148.5	18.51	0.485289
2024-05-23 02:00:00	2535	18.22	0.408319	2147.7	18.35	0.480839
2024-05-23 02:30:00	2534.6	18.1	0.408319	2146.9	18.25	0.480839
2024-05-23 03:00:00	2534.3	18.02	0.409261	2146.1	18.18	0.479733
2024-05-23 03:30:00	2534	17.97	0.409261	2145.4	18.1	0.477529
2024-05-23 04:00:00	2533.4	17.9	0.408319	2144.6	18.1	0.476431
2024-05-23 04:30:00	2532.7	17.86	0.406443	2143.8	18.1	0.475335
2024-05-23 05:00:00	2532.5	17.8	0.405509	2143.2	18.03	0.474242
2024-05-23 05:30:00	2531.6	17.75	0.404576	2142.3	18	0.470977
2024-05-23 06:00:00	2531	17.7	0.403645	2141.6	17.92	0.469894
2024-05-23 06:30:00	2530.5	17.64	0.405509	2140.7	17.9	0.466659
2024-05-23 07:00:00	2529.3	17.71	0.404576	2139.7	18.02	0.464515
2024-05-23 07:30:00	2526.4	17.94	0.406443	2137.7	18.35	0.463447
2024-05-23 08:00:00	2523.1	18.18	0.406443	2135.8	18.7	0.461318
2024-05-23 08:30:00	2519.4	18.43	0.410204	2133.1	19.12	0.460257
2024-05-23 09:00:00	2514.8	18.75	0.41115	2130.2	19.55	0.457088
2024-05-23 09:30:00	2509.6	19.18	0.414954	2126.7	20.09	0.452898
2024-05-23 10:00:00	2503.4	19.55	0.418794	2122.8	20.59	0.448745
2024-05-23 10:30:00	2498	19.8	0.422669	2119.1	20.91	0.443609
2024-05-23 11:00:00	2524.5	19.99	0.427563	2143.3	21.17	0.444631
2024-05-23 11:30:00	2581.5	20.04	0.392645	2237	21.13	0.5236
2024-05-23 12:00:00	2577.6	20.33	0.391742	2240	21.43	0.594292
2024-05-23 12:30:00	2573.8	20.65	0.394457	2232.6	21.87	0.61235
2024-05-23 13:00:00	2568.8	20.94	0.395367	2224.9	22.25	0.61235
2024-05-23 13:30:00	2564.4	21.16	0.397192	2216.1	22.55	0.60256
2024-05-23 14:00:00	2560.1	21.37	0.399945	2207.7	22.81	0.592925
2024-05-23 14:30:00	2555.1	21.58	0.401791	2199.1	23.11	0.583445
2024-05-23 15:00:00	2550.7	21.75	0.404576	2191.1	23.39	0.570164
2024-05-23 15:30:00	2545.6	21.89	0.408319	2183.5	23.63	0.561048
2024-05-23 16:00:00	2541.1	22.01	0.409261	2175.7	23.88	0.550808
2024-05-23 16:30:00	2535.5	22.1	0.413048	2168.8	24.07	0.539511
2024-05-23 17:00:00	2531	22.19	0.415911	2161.5	24.21	0.532108
2024-05-23 17:30:00	2525.5	22.2	0.418794	2155.3	24.3	0.522396
2024-05-23 18:00:00	2520.4	22.15	0.420727	2150	24.3	0.514044
2024-05-23 18:30:00	2516.5	21.94	0.421697	2144.7	24.2	0.505825
2024-05-23 19:00:00	2513.6	21.64	0.423643	2139.8	23.86	0.496592
2024-05-23 19:30:00	2511.4	21.33	0.422669	2135.6	23.47	0.489779
2024-05-23 20:00:00	2509.5	21.09	0.422669	2132.4	23.11	0.480839
2024-05-23 20:30:00	2507.6	20.91	0.421697	2129.6	22.76	0.475335
2024-05-23 21:00:00	2507	20.68	0.422669	2127.5	22.4	0.470977
2024-05-23 21:30:00	2506.6	20.39	0.422669	2126.1	21.95	0.462381
2024-05-23 22:00:00	2506.7	20.06	0.420727	2125	21.44	0.457088
2024-05-23 22:30:00	2506.7	19.71	0.420727	2124.1	20.88	0.453942
2024-05-23 23:00:00	2507	19.38	0.420727	2123.3	20.36	0.450817
2024-05-23 23:30:00	2507.1	19.13	0.41783	2122.6	19.89	0.445656
2024-05-24	2507.1	18.96	0.419759	2122	19.54	0.444631
2024-05-24 00:30:00	2507.2	18.75	0.418794	2121.1	19.25	0.440555
2024-05-24 01:00:00	2506.9	18.62	0.414954	2120.4	19.05	0.438531
2024-05-24 01:30:00	2506.8	18.46	0.416869	2119.7	18.82	0.435512
2024-05-24 02:00:00	2506.5	18.37	0.416869	2118.7	18.65	0.431519
2024-05-24 02:30:00	2506.2	18.23	0.416869	2118	18.51	0.430527
2024-05-24 03:00:00	2506	18.14	0.414954	2117.4	18.4	0.428549
2024-05-24 03:30:00	2505.6	18.02	0.414954	2116.7	18.3	0.425598
2024-05-24 04:00:00	2505.3	17.96	0.414954	2115.9	18.25	0.42462
2024-05-24 04:30:00	2504.7	17.9	0.416869	2115.3	18.2	0.422669
2024-05-24 05:00:00	2504.2	17.86	0.415911	2114.5	18.13	0.420727
2024-05-24 05:30:00	2503.8	17.8	0.415911	2113.7	18.1	0.419759
2024-05-24 06:00:00	2503.4	17.74	0.416869	2113	18.1	0.41783
2024-05-24 06:30:00	2502.9	17.7	0.415911	2112.2	18.07	0.415911
2024-05-24 07:00:00	2501.8	17.74	0.415911	2111.3	18.08	0.414
2024-05-24 07:30:00	2499.6	17.88	0.416869	2110.2	18.22	0.412098
2024-05-24 08:00:00	2496.9	18.06	0.41783	2108.5	18.44	0.410204
2024-05-24 08:30:00	2494.2	18.24	0.418794	2106.9	18.7	0.408319
2024-05-24 09:00:00	2490.9	18.49	0.420727	2104.7	19.03	0.404576
2024-05-24 09:30:00	2487	18.81	0.423643	2102	19.42	0.403645
2024-05-24 10:00:00	2483.3	19.18	0.427563	2099.2	19.86	0.401791
2024-05-24 10:30:00	2478.4	19.6	0.430527	2096.1	20.37	0.397192
2024-05-24 11:00:00	2473.1	20	0.43451	2092.3	20.91	0.39355
2024-05-24 11:30:00	2466.9	20.37	0.440555	2088.1	21.41	0.390841
2024-05-24 12:00:00	2461.3	20.69	0.446684	2084.6	21.89	0.387258
2024-05-24 12:30:00	2455.8	20.98	0.44978	2081.1	22.27	0.384592
2024-05-24 13:00:00	2514.1	21.25	0.450817	2273.8	22.63	0.653131
2024-05-24 13:30:00	2569.8	21.45	0.410204	2370.6	22.99	0.895365
2024-05-24 14:00:00	2567.2	21.61	0.409261	2347.4	23.17	0.847227
2024-05-24 14:30:00	2562.4	21.75	0.41115	2329.8	23.35	0.809096
2024-05-24 15:00:00	2557.8	21.89	0.41115	2314.9	23.57	0.776247
2024-05-24 15:30:00	2553.5	22	0.414	2302.4	23.76	0.751623
2024-05-24 16:00:00	2549	22.1	0.415911	2291.1	23.95	0.732825
2024-05-24 16:30:00	2544.9	22.2	0.41783	2280.4	24.07	0.716143
2024-05-24 17:00:00	2540.5	22.26	0.415911	2269.9	24.1	0.701455
2024-05-24 17:30:00	2537.2	22.3	0.419759	2260.5	24.1	0.687068
2024-05-24 18:00:00	2533.9	22.23	0.420727	2252.9	24.01	0.674528
2024-05-24 18:30:00	2531.9	21.94	0.422669	2246.7	23.67	0.663743
2024-05-24 19:00:00	2530.3	21.65	0.420727	2241.4	23.29	0.654636
2024-05-24 19:30:00	2528.7	21.42	0.420727	2236.3	22.94	0.644169
2024-05-24 20:00:00	2527.3	21.24	0.420727	2232.1	22.62	0.638263
2024-05-24 20:30:00	2525.6	21.12	0.41783	2229	22.37	0.630957
2024-05-24 21:00:00	2524.9	20.89	0.415911	2225.5	22.06	0.623735
2024-05-24 21:30:00	2524.2	20.55	0.418794	2223.1	21.62	0.618016
2024-05-24 22:00:00	2524.1	20.21	0.415911	2221.8	21.17	0.613762
2024-05-24 22:30:00	2524.2	19.89	0.415911	2220.4	20.7	0.609537
2024-05-24 23:00:00	2524.3	19.6	0.415911	2219	20.27	0.605341
2024-05-24 23:30:00	2524.3	19.33	0.414	2217.6	19.88	0.60256
2024-05-25	2524.6	19.09	0.413048	2216.8	19.53	0.599791
2024-05-25 00:30:00	2524.6	18.92	0.410204	2215.3	19.21	0.595662
2024-05-25 01:00:00	2524.4	18.76	0.410204	2214.3	18.97	0.595662
2024-05-25 01:30:00	2524.4	18.59	0.41115	2212.9	18.74	0.590201
2024-05-25 02:00:00	2524.3	18.44	0.409261	2211.7	18.54	0.590201
2024-05-25 02:30:00	2524	18.33	0.405509	2210.2	18.41	0.586138
2024-05-25 03:00:00	2523.7	18.2	0.406443	2209.2	18.3	0.583445
2024-05-25 03:30:00	2523.3	18.11	0.408319	2207.9	18.21	0.582103
2024-05-25 04:00:00	2522.9	18.06	0.408319	2206.6	18.18	0.579429
2024-05-25 04:30:00	2522.4	18	0.40738	2205.6	18.1	0.574116
2024-05-25 05:00:00	2521.7	17.9	0.406443	2204.2	18.09	0.574116
2024-05-25 05:30:00	2521.4	17.87	0.404576	2202.7	18	0.571479
2024-05-25 06:00:00	2520.9	17.8	0.404576	2201.4	18	0.564937
2024-05-25 06:30:00	2520.2	17.8	0.406443	2199.9	17.98	0.564937
2024-05-25 07:00:00	2518.5	17.84	0.404576	2197.8	18.05	0.563638
2024-05-25 07:30:00	2516	17.96	0.40738	2194.7	18.28	0.559758
2024-05-25 08:00:00	2513.3	18.13	0.405509	2191.4	18.5	0.55335
2024-05-25 08:30:00	2510.3	18.31	0.406443	2187.7	18.77	0.545758
2024-05-25 09:00:00	2506.1	18.56	0.412098	2182.8	19.13	0.53827
2024-05-25 09:30:00	2501.9	18.78	0.413048	2178	19.44	0.534564
2024-05-25 10:00:00	2498.2	18.98	0.416869	2173.2	19.68	0.526017
2024-05-25 10:30:00	2494.5	19.26	0.420727	2168.4	20.02	0.519996
2024-05-25 11:00:00	2490	19.59	0.420727	2163.5	20.44	0.512861
2024-05-25 11:30:00	2485.2	19.93	0.425598	2158.1	20.86	0.506991
2024-05-25 12:00:00	2480.7	20.24	0.429536	2152	21.29	0.496592
2024-05-25 12:30:00	2475.8	20.5	0.43451	2145.7	21.64	0.490908
2024-05-25 13:00:00	2472	20.74	0.439542	2139.7	21.97	0.481948
2024-05-25 13:30:00	2467.1	20.94	0.444631	2133.7	22.2	0.474242
2024-05-25 14:00:00	2462.2	21.08	0.447713	2127.6	22.37	0.466659
2024-05-25 14:30:00	2457.3	21.25	0.451856	2121.7	22.56	0.457088
2024-05-25 15:00:00	2451.6	21.45	0.456037	2115.6	22.79	0.44978
2024-05-25 15:30:00	2446.4	21.65	0.459198	2109.6	23.06	0.44157
2024-05-25 16:00:00	2440.6	21.81	0.463447	2104	23.31	0.435512
2024-05-25 16:30:00	2435.4	21.9	0.468813	2098.9	23.53	0.42658
2024-05-25 17:00:00	2430.5	21.99	0.473151	2094.7	23.68	0.422669
2024-05-25 17:30:00	2426.1	22.01	0.47863	2091.1	23.7	0.415911
2024-05-25 18:00:00	2422.1	21.93	0.484172	2087.9	23.7	0.410204
2024-05-25 18:30:00	2421.5	21.63	0.490908	2084.5	23.58	0.404576
2024-05-25 19:00:00	2635.2	20.53	0.508159	2224.2	23.1	0.550808
2024-05-25 19:30:00	2695.2	20	0.39355	2340.5	22.15	0.797995
2024-05-25 20:00:00	2689.3	20.04	0.372392	2327.1	21.86	0.774462
2024-05-25 20:30:00	2688.3	20.1	0.368129	2319.4	21.69	0.753356
2024-05-25 21:00:00	2687.7	20.02	0.363078	2314.8	21.46	0.743019
2024-05-25 21:30:00	2688.2	19.81	0.363915	2312	21.1	0.736207
2024-05-25 22:00:00	2688.6	19.54	0.359749	2310.3	20.66	0.729458
2024-05-25 22:30:00	2688.7	19.28	0.358096	2308.1	20.19	0.726106
2024-05-25 23:00:00	2689.2	19.1	0.355631	2308.1	19.84	0.72277
2024-05-25 23:30:00	2689.7	18.91	0.35156	2307.1	19.5	0.719449
2024-05-26	2689.3	18.76	0.350752	2306.5	19.28	0.714496
2024-05-26 00:30:00	2689	18.62	0.348337	2305.8	19.04	0.714496
2024-05-26 01:00:00	2688.8	18.48	0.345144	2305.8	18.87	0.711214
2024-05-26 01:30:00	2688.6	18.38	0.345144	2305.1	18.69	0.711214
2024-05-26 02:00:00	2688.4	18.27	0.342768	2304.3	18.53	0.707946
2024-05-26 02:30:00	2686.8	18.16	0.338844	2303.5	18.43	0.704693
2024-05-26 03:00:00	2686.2	18.08	0.338844	2302.4	18.33	0.704693
2024-05-26 03:30:00	2685.3	18	0.338065	2301.2	18.3	0.703072
2024-05-26 04:00:00	2684.8	17.9	0.336512	2300.5	18.21	0.699842
2024-05-26 04:30:00	2683.7	17.86	0.334965	2299.6	18.18	0.698232
2024-05-26 05:00:00	2681	17.8	0.328852	2298.9	18.1	0.696627
2024-05-26 05:30:00	2679	17.73	0.326588	2297.6	18.05	0.696627
2024-05-26 06:00:00	2678.5	17.7	0.326588	2296.6	18	0.695024
2024-05-26 06:30:00	2677.2	17.7	0.325087	2295.2	18	0.69024
2024-05-26 07:00:00	2674.5	17.7	0.323594	2293.6	18.07	0.687068
2024-05-26 07:30:00	2670.8	17.78	0.320627	2290	18.25	0.680769
2024-05-26 08:00:00	2666.3	17.93	0.31842	2286.1	18.48	0.677642
2024-05-26 08:30:00	2659.8	18.09	0.316228	2281.4	18.76	0.671429
2024-05-26 09:00:00	2649.9	18.31	0.3155	2275.4	19.09	0.665273
2024-05-26 09:30:00	2644	18.62	0.316957	2269.5	19.48	0.656145
2024-05-26 10:00:00	2638.6	19.01	0.316957	2262.1	19.93	0.645654
2024-05-26 10:30:00	2632.9	19.35	0.31842	2253.9	20.36	0.63387
2024-05-26 11:00:00	2625.7	19.63	0.31842	2244.5	20.76	0.625173
2024-05-26 11:30:00	2617.5	19.91	0.319154	2234.5	21.1	0.613762
2024-05-26 12:00:00	2612.7	20.17	0.321366	2225.6	21.47	0.601174
2024-05-26 12:30:00	2609	20.4	0.320627	2217.8	21.85	0.588844
2024-05-26 13:00:00	2605.2	20.67	0.320627	2208.7	22.25	0.578096
2024-05-26 13:30:00	2600.3	20.94	0.320627	2200.3	22.62	0.567545
2024-05-26 14:00:00	2595.6	21.21	0.322107	2191	22.98	0.555904
2024-05-26 14:30:00	2590.4	21.46	0.322107	2183	23.32	0.544503
2024-05-26 15:00:00	2586.1	21.66	0.325837	2174.1	23.61	0.532108
2024-05-26 15:30:00	2581.8	21.83	0.326588	2166.2	23.89	0.521195
2024-05-26 16:00:00	2578	21.95	0.331131	2171.9	23.94	0.521195
2024-05-26 16:30:00	2575	22.07	0.33266	2185	24.08	0.53827
2024-05-26 17:00:00	2571.9	22.17	0.333426	2184.9	24.34	0.54325
2024-05-26 17:30:00	2568.4	22.25	0.334965	2180.7	24.51	0.53827
2024-05-26 18:00:00	2563.9	22.22	0.337287	2174.3	24.6	0.530884
2024-05-26 18:30:00	2560.9	22.08	0.338844	2169.2	24.58	0.521195
2024-05-26 19:00:00	2558.6	21.87	0.340408	2164.6	24.37	0.514044
2024-05-26 19:30:00	2557.4	21.6	0.340408	2161.3	24.01	0.505825
2024-05-26 20:00:00	2555.5	21.37	0.341979	2158.8	23.62	0.498884
2024-05-26 20:30:00	2554.3	21.2	0.340408	2156.6	23.24	0.49204
2024-05-26 21:00:00	2553.3	21.01	0.341193	2154.4	22.81	0.484172
2024-05-26 21:30:00	2553.3	20.73	0.341193	2152.9	22.29	0.479733
2024-05-26 22:00:00	2553.3	20.44	0.337287	2151.4	21.77	0.475335
2024-05-26 22:30:00	2553.7	20.14	0.338844	2150.5	21.25	0.469894
2024-05-26 23:00:00	2554.2	19.84	0.336512	2149.8	20.73	0.464515
2024-05-26 23:30:00	2554.4	19.55	0.337287	2149.1	20.23	0.462381
2024-05-27	2554.3	19.36	0.334965	2148.4	19.89	0.461318
2024-05-27 00:30:00	2554.4	19.17	0.334195	2147.6	19.55	0.458142
2024-05-27 01:00:00	2554	19.02	0.334195	2146.7	19.28	0.456037
2024-05-27 01:30:00	2553.9	18.85	0.333426	2146.1	19.06	0.453942
2024-05-27 02:00:00	2554.1	18.72	0.333426	2145.4	18.89	0.451856
2024-05-27 02:30:00	2553.7	18.6	0.334965	2144.4	18.74	0.44978
2024-05-27 03:00:00	2553.3	18.48	0.33266	2143.5	18.63	0.446684
2024-05-27 03:30:00	2553.2	18.4	0.333426	2142.9	18.51	0.446684
2024-05-27 04:00:00	2553.2	18.3	0.33266	2142.1	18.42	0.443609
2024-05-27 04:30:00	2552.4	18.24	0.328852	2141.2	18.37	0.44157
2024-05-27 05:00:00	2551.9	18.14	0.328852	2140.3	18.3	0.438531
2024-05-27 05:30:00	2551.7	18.1	0.328095	2139.3	18.23	0.435512
2024-05-27 06:00:00	2550.9	18.06	0.33037	2138.3	18.2	0.436516
2024-05-27 06:30:00	2550.3	18	0.331894	2137.4	18.2	0.43451
2024-05-27 07:00:00	2548.8	18.04	0.331894	2136.1	18.27	0.433511
2024-05-27 07:30:00	2546.4	18.14	0.328852	2134.6	18.46	0.430527
2024-05-27 08:00:00	2543.9	18.29	0.328852	2132.6	18.73	0.428549
2024-05-27 08:30:00	2540.4	18.48	0.331131	2130.1	19.07	0.42658
2024-05-27 09:00:00	2537.1	18.7	0.333426	2127.5	19.43	0.423643
2024-05-27 09:30:00	2532.9	19.06	0.33266	2124.3	19.89	0.416869
2024-05-27 10:00:00	2528.1	19.45	0.334965	2120.6	20.42	0.415911
2024-05-27 10:30:00	2523.1	19.79	0.338065	2116	20.9	0.412098
2024-05-27 11:00:00	2518.1	20.09	0.339625	2111	21.32	0.408319
2024-05-27 11:30:00	2514.3	20.35	0.343558	2105.8	21.73	0.403645
2024-05-27 12:00:00	2511.3	20.61	0.342768	2101	22.11	0.397192
2024-05-27 12:30:00	2520.8	20.87	0.353183	2102	22.47	0.394457
2024-05-27 13:00:00	2639.4	21	0.416869	2157.5	22.52	0.420727
2024-05-27 13:30:00	2634.2	21.13	0.401791	2181.9	22.76	0.461318
2024-05-27 14:00:00	2628.9	21.35	0.398107	2179.8	23.12	0.483059
2024-05-27 14:30:00	2620.8	21.57	0.396278	2173.6	23.45	0.486407
2024-05-27 15:00:00	2614.9	21.75	0.390841	2166.2	23.73	0.483059
2024-05-27 15:30:00	2608.8	21.9	0.386367	2158.6	23.99	0.477529
2024-05-27 16:00:00	2603	22.02	0.377572	2151.9	24.22	0.469894
2024-05-27 16:30:00	2597.3	22.11	0.374111	2145.9	24.46	0.461318
2024-05-27 17:00:00	2592.1	22.22	0.368978	2139.7	24.68	0.456037
2024-05-27 17:30:00	2585.5	22.31	0.363915	2132.9	24.89	0.448745
2024-05-27 18:00:00	2580.1	22.4	0.363078	2127.3	25.06	0.44157
2024-05-27 18:30:00	2575.1	22.4	0.36141	2121.5	25.16	0.43451
2024-05-27 19:00:00	2570.9	22.27	0.358096	2116.7	25.06	0.427563
2024-05-27 19:30:00	2568.2	22.03	0.356451	2112.1	24.77	0.418794
2024-05-27 20:00:00	2565.6	21.73	0.355631	2108.4	24.36	0.414954
2024-05-27 20:30:00	2564.6	21.48	0.352371	2105.5	23.91	0.409261
2024-05-27 21:00:00	2563.6	21.29	0.352371	2103.1	23.44	0.403645
2024-05-27 21:30:00	2563	21.02	0.349945	2101.5	22.89	0.398107
2024-05-27 22:00:00	2562.7	20.72	0.34914	2100.4	22.34	0.39355
2024-05-27 22:30:00	2562.8	20.44	0.346737	2099.1	21.84	0.389045
2024-05-27 23:00:00	2562.4	20.17	0.347536	2098.4	21.35	0.386367
2024-05-27 23:30:00	2562.3	19.89	0.347536	2097.6	20.89	0.381066
2024-05-28	2562.3	19.6	0.345939	2096.9	20.43	0.378443
2024-05-28 00:30:00	2562.3	19.35	0.345939	2096.1	20.02	0.376704
2024-05-28 01:00:00	2562.1	19.13	0.345144	2095.7	19.66	0.372392
2024-05-28 01:30:00	2561.7	19.04	0.341979	2095.3	19.46	0.370681
2024-05-28 02:00:00	2561.3	18.89	0.341193	2094.7	19.25	0.368978
2024-05-28 02:30:00	2561.3	18.79	0.342768	2094.4	19.04	0.367282
2024-05-28 03:00:00	2560.9	18.67	0.341979	2093.8	18.98	0.364754
2024-05-28 03:30:00	2560.2	18.53	0.341193	2093.2	18.83	0.363078
2024-05-28 04:00:00	2559.9	18.47	0.338844	2092.9	18.76	0.362243
2024-05-28 04:30:00	2559.6	18.36	0.335738	2092.2	18.64	0.360579
2024-05-28 05:00:00	2559	18.3	0.336512	2091.5	18.6	0.358096
2024-05-28 05:30:00	2558.8	18.21	0.338844	2090.9	18.52	0.358096
2024-05-28 06:00:00	2558.1	18.19	0.336512	2090.3	18.5	0.356451
2024-05-28 06:30:00	2557.4	18.1	0.337287	2089.8	18.43	0.354813
2024-05-28 07:00:00	2556.2	18.16	0.336512	2088.6	18.53	0.352371
2024-05-28 07:30:00	2553.3	18.31	0.335738	2087.5	18.71	0.349945
2024-05-28 08:00:00	2549.7	18.44	0.335738	2085.3	18.94	0.34914
2024-05-28 08:30:00	2546.1	18.61	0.335738	2082.9	19.18	0.346737
2024-05-28 09:00:00	2542.8	18.77	0.331894	2080.3	19.41	0.34435
2024-05-28 09:30:00	2539.4	18.96	0.335738	2077.5	19.66	0.342768
2024-05-28 10:00:00	2535.6	19.25	0.337287	2074.2	20.07	0.339625
2024-05-28 10:30:00	2530.7	19.57	0.334965	2070.3	20.51	0.337287
2024-05-28 11:00:00	2538.7	19.87	0.345939	2069.3	20.92	0.334965
2024-05-28 11:30:00	2573.1	20.06	0.363078	2072	21.26	0.333426
2024-05-28 12:00:00	2568.9	20.27	0.363078	2071.9	21.54	0.334195
2024-05-28 12:30:00	2564.9	20.44	0.363078	2072.8	21.71	0.338065
2024-05-28 13:00:00	2560.9	20.57	0.36141	2073.9	21.85	0.338065
2024-05-28 13:30:00	2557.5	20.7	0.357273	2074.7	21.93	0.341193
2024-05-28 14:00:00	2554.5	20.78	0.357273	2075.3	22.02	0.343558
2024-05-28 14:30:00	2551.9	20.89	0.358096	2075.8	22.12	0.345144
2024-05-28 15:00:00	2550.6	20.9	0.358096	2076.2	22.2	0.345144
2024-05-28 15:30:00	2549	20.98	0.356451	2076.6	22.2	0.345144
2024-05-28 16:00:00	2547.8	21.06	0.355631	2076.4	22.29	0.343558
2024-05-28 16:30:00	2545.9	21.16	0.354813	2076.3	22.38	0.34435
2024-05-28 17:00:00	2544.2	21.26	0.353997	2075.9	22.53	0.34435
2024-05-28 17:30:00	2541.7	21.38	0.353183	2075.2	22.65	0.345144
2024-05-28 18:00:00	2539.5	21.4	0.352371	2074.5	22.7	0.34435
2024-05-28 18:30:00	2537.7	21.33	0.35156	2074.1	22.59	0.341979
2024-05-28 19:00:00	2536.6	21.2	0.34914	2073.5	22.4	0.342768
2024-05-28 19:30:00	2536	21.1	0.34914	2073	22.21	0.341979
2024-05-28 20:00:00	2534.8	20.96	0.349945	2072.3	21.99	0.338065
2024-05-28 20:30:00	2534.2	20.79	0.348337	2071.9	21.71	0.338844
2024-05-28 21:00:00	2533.9	20.54	0.347536	2071.7	21.37	0.337287
2024-05-28 21:30:00	2533.6	20.25	0.345939	2071.9	20.99	0.335738
2024-05-28 22:00:00	2533.5	19.93	0.348337	2071.7	20.53	0.334965
2024-05-28 22:30:00	2533.8	19.64	0.345939	2071.6	20.04	0.33266
2024-05-28 23:00:00	2533.8	19.46	0.345144	2071.4	19.77	0.331894
2024-05-28 23:30:00	2533.4	19.26	0.345144	2071.3	19.48	0.33037
2024-05-29	2533.4	19.07	0.34435	2071.3	19.22	0.32961
2024-05-29 00:30:00	2533.3	18.91	0.341193	2071.4	19.01	0.328852
2024-05-29 01:00:00	2532.8	18.78	0.343558	2071.2	18.88	0.323594
2024-05-29 01:30:00	2532.7	18.63	0.342768	2070.7	18.72	0.325837
2024-05-29 02:00:00	2532.5	18.55	0.342768	2070.6	18.6	0.32434
2024-05-29 02:30:00	2532.2	18.43	0.340408	2070.4	18.55	0.325837
2024-05-29 03:00:00	2531.9	18.36	0.337287	2070.3	18.48	0.32434
2024-05-29 03:30:00	2531.5	18.27	0.338065	2069.8	18.4	0.325087
2024-05-29 04:00:00	2531.2	18.16	0.339625	2069.4	18.32	0.322849
2024-05-29 04:30:00	2530.5	18.1	0.338844	2069.3	18.3	0.321366
2024-05-29 05:00:00	2529.9	18.08	0.337287	2069	18.21	0.31989
2024-05-29 05:30:00	2529.4	18	0.338844	2068.7	18.2	0.322107
2024-05-29 06:00:00	2528.9	17.92	0.339625	2068.5	18.2	0.31989
2024-05-29 06:30:00	2528.2	17.9	0.340408	2068	18.15	0.31989
2024-05-29 07:00:00	2527.4	17.9	0.338844	2067.7	18.15	0.319154
2024-05-29 07:30:00	2526.5	17.89	0.338065	2067.3	18.2	0.317687
2024-05-29 08:00:00	2525.6	17.8	0.335738	2066.8	18.2	0.3155
2024-05-29 08:30:00	2524.7	17.8	0.336512	2066.1	18.22	0.314051
2024-05-29 09:00:00	2523.9	17.92	0.334965	2065.4	18.35	0.312608
2024-05-29 09:30:00	2522	18.15	0.336512	2064.1	18.72	0.313329
2024-05-29 10:00:00	2519.7	18.42	0.335738	2062.3	19.18	0.312608
2024-05-29 10:30:00	2517.5	18.64	0.335738	2060.9	19.53	0.311889
2024-05-29 11:00:00	2515.7	18.88	0.334965	2065.6	19.87	0.30903
2024-05-29 11:30:00	2513.3	19.21	0.338065	2098.8	20.05	0.314775
2024-05-29 12:00:00	2510.9	19.43	0.338844	2123.3	20.32	0.325087
2024-05-29 12:30:00	2507.8	19.69	0.338065	2139.2	20.7	0.340408
2024-05-29 13:00:00	2519.5	19.92	0.349945	2170	21.06	0.372392
2024-05-29 13:30:00	2518.3	20.14	0.349945	2175.5	21.39	0.406443
2024-05-29 14:00:00	2515.2	20.38	0.34435	2171.5	21.73	0.425598
2024-05-29 14:30:00	2511.5	20.66	0.347536	2165.2	22.11	0.43451
2024-05-29 15:00:00	2507.3	20.91	0.346737	2158.5	22.43	0.436516
2024-05-29 15:30:00	2504.5	21.05	0.347536	2153.5	22.65	0.433511
2024-05-29 16:00:00	2502.1	21.17	0.346737	2148.1	22.78	0.432514
2024-05-29 16:30:00	2499.5	21.33	0.345939	2142.7	22.99	0.427563
2024-05-29 17:00:00	2497.1	21.48	0.345939	2137.3	23.19	0.421697
2024-05-29 17:30:00	2495.1	21.57	0.345144	2132.7	23.25	0.419759
2024-05-29 18:00:00	2491.7	21.6	0.345144	2127.6	23.37	0.413048
2024-05-29 18:30:00	2489.3	21.55	0.345939	2122.4	23.37	0.409261
2024-05-29 19:00:00	2487.8	21.35	0.347536	2117.9	23.15	0.405509
2024-05-29 19:30:00	2487.4	21.17	0.34914	2114.3	22.88	0.400867
2024-05-29 20:00:00	2486.6	21.04	0.349945	2111.1	22.61	0.39355
2024-05-29 20:30:00	2486.4	20.88	0.350752	2108.6	22.34	0.389942
2024-05-29 21:00:00	2486.3	20.65	0.350752	2106.1	22	0.386367
2024-05-29 21:30:00	2486.4	20.35	0.35156	2104.3	21.58	0.382825
2024-05-29 22:00:00	2486.6	20.04	0.35156	2102.9	21.14	0.378443
2024-05-29 22:30:00	2487.1	19.75	0.350752	2101.7	20.71	0.374973
2024-05-29 23:00:00	2487.3	19.47	0.352371	2100.4	20.28	0.372392
2024-05-29 23:30:00	2487.6	19.3	0.35156	2099.4	19.94	0.368129
2024-05-30	2487.6	19.11	0.35156	2098.5	19.66	0.366438
2024-05-30 00:30:00	2488.1	18.95	0.349945	2097.6	19.4	0.363915
2024-05-30 01:00:00	2488.3	18.76	0.352371	2096.8	19.19	0.36141
2024-05-30 01:30:00	2488.4	18.62	0.35156	2096	19.01	0.359749
2024-05-30 02:00:00	2488.3	18.48	0.35156	2095.3	18.84	0.358096
2024-05-30 02:30:00	2488.1	18.37	0.35156	2094.6	18.72	0.355631
2024-05-30 03:00:00	2488.1	18.28	0.352371	2093.6	18.59	0.354813
2024-05-30 03:30:00	2487.8	18.17	0.349945	2092.8	18.5	0.352371
2024-05-30 04:00:00	2487.8	18.09	0.347536	2092	18.42	0.35156
2024-05-30 04:30:00	2487.7	17.99	0.347536	2091.3	18.35	0.35156
2024-05-30 05:00:00	2487.1	17.9	0.349945	2090.5	18.3	0.34914
2024-05-30 05:30:00	2487.1	17.88	0.34914	2089.4	18.23	0.345144
2024-05-30 06:00:00	2486.5	17.8	0.350752	2088.9	18.2	0.345939
2024-05-30 06:30:00	2486.1	17.8	0.350752	2087.8	18.2	0.345939
2024-05-30 07:00:00	2485.8	17.73	0.350752	2087.2	18.2	0.343558
2024-05-30 07:30:00	2484.5	17.82	0.350752	2085.9	18.27	0.340408
2024-05-30 08:00:00	2483.3	17.94	0.34914	2084.8	18.47	0.338065
2024-05-30 08:30:00	2481.8	18.1	0.346737	2083.4	18.72	0.338065
2024-05-30 09:00:00	2479.6	18.29	0.349945	2081.3	19.05	0.338065
2024-05-30 09:30:00	2476.9	18.59	0.35156	2079.1	19.47	0.335738
2024-05-30 10:00:00	2473.6	18.96	0.349945	2076	19.88	0.331131
2024-05-30 10:30:00	2469.3	19.3	0.35156	2072.1	20.32	0.32961
2024-05-30 11:00:00	2465.2	19.62	0.35156	2068.4	20.73	0.326588
2024-05-30 11:30:00	2485.2	19.9	0.372392	2070	20.99	0.32434
2024-05-30 12:00:00	2485.5	20.13	0.374973	2068.8	21.28	0.32434
2024-05-30 12:30:00	2482.1	20.37	0.372392	2067.7	21.61	0.32434
2024-05-30 13:00:00	2477	20.61	0.372392	2066.7	21.95	0.32434
2024-05-30 13:30:00	2472	20.87	0.372392	2066	22.27	0.323594
2024-05-30 14:00:00	2466.6	21.1	0.37325	2064.4	22.56	0.322849
2024-05-30 14:30:00	2461.3	21.31	0.372392	2062.7	22.84	0.322849
2024-05-30 15:00:00	2455.9	21.49	0.370681	2060.7	23.12	0.320627
2024-05-30 15:30:00	2451.1	21.63	0.369828	2058	23.4	0.31989
2024-05-30 16:00:00	2446.2	21.7	0.369828	2054.2	23.64	0.316228
2024-05-30 16:30:00	2441.6	21.8	0.371535	2050.4	23.96	0.311889
2024-05-30 17:00:00	2437.7	21.9	0.37325	2046.6	24.3	0.308319
2024-05-30 17:30:00	2433.9	21.9	0.374111	2043.3	24.45	0.306196
2024-05-30 18:00:00	2456.5	21.84	0.389942	2050.3	24.31	0.304089
2024-05-30 18:30:00	2460.6	21.59	0.389045	2057.9	23.81	0.304089
2024-05-30 19:00:00	2459.4	21.37	0.38815	2065.7	23.53	0.306196
2024-05-30 19:30:00	2458.2	21.17	0.387258	2072.8	23.23	0.308319
2024-05-30 20:00:00	2457.4	21.03	0.385478	2078.2	22.92	0.310456
2024-05-30 20:30:00	2456.8	20.91	0.382825	2082.2	22.63	0.313329
2024-05-30 21:00:00	2456.2	20.76	0.384592	2084.8	22.33	0.317687
2024-05-30 21:30:00	2456.2	20.58	0.383707	2086.5	21.97	0.320627
2024-05-30 22:00:00	2456	20.3	0.383707	2087.8	21.57	0.320627
2024-05-30 22:30:00	2456.2	20.03	0.381066	2088.7	21.16	0.322107
2024-05-30 23:00:00	2456.5	19.73	0.382825	2089.5	20.73	0.326588
2024-05-30 23:30:00	2456.8	19.45	0.380189	2090.1	20.29	0.327341
2024-05-31	2457	19.2	0.380189	2090.4	19.87	0.326588
2024-05-31 00:30:00	2456.9	19.07	0.381066	2090.6	19.6	0.328095
2024-05-31 01:00:00	2457.4	18.92	0.379315	2090.6	19.38	0.33037
2024-05-31 01:30:00	2457	18.74	0.377572	2091	19.14	0.33037
2024-05-31 02:00:00	2456.9	18.68	0.375837	2091	19.01	0.33037
2024-05-31 02:30:00	2456.8	18.55	0.377572	2090.8	18.87	0.331131
2024-05-31 03:00:00	2456.4	18.47	0.377572	2090.8	18.77	0.331131
2024-05-31 03:30:00	2456.3	18.34	0.377572	2090.6	18.63	0.32961
2024-05-31 04:00:00	2455.9	18.29	0.376704	2090.3	18.56	0.328852
2024-05-31 04:30:00	2455.7	18.2	0.374973	2090	18.43	0.328852
2024-05-31 05:00:00	2455.3	18.12	0.375837	2089.7	18.39	0.33037
2024-05-31 05:30:00	2454.8	18.08	0.375837	2089.4	18.3	0.33037
2024-05-31 06:00:00	2454.3	18	0.374973	2089.1	18.24	0.32961
2024-05-31 06:30:00	2453.9	17.95	0.374111	2088.6	18.2	0.32961
2024-05-31 07:00:00	2453.1	17.93	0.37325	2088.3	18.25	0.328852
2024-05-31 07:30:00	2452.1	18.04	0.372392	2087.3	18.39	0.328095
2024-05-31 08:00:00	2450.5	18.17	0.372392	2086.5	18.61	0.328852
2024-05-31 08:30:00	2447.9	18.35	0.372392	2085.3	18.9	0.326588
2024-05-31 09:00:00	2444.9	18.58	0.371535	2083.9	19.26	0.328095
2024-05-31 09:30:00	2441.2	18.87	0.368129	2083.1	19.66	0.327341
2024-05-31 10:00:00	2469.8	19.2	0.390841	2088.5	19.98	0.328095
2024-05-31 10:30:00	2477.5	19.52	0.390841	2091.7	20.35	0.331131
2024-05-31 11:00:00	2474.4	19.85	0.389045	2097.6	20.76	0.334965
2024-05-31 11:30:00	2496.6	20.13	0.399025	2142.8	21	0.357273
2024-05-31 12:00:00	2495.4	20.38	0.39355	2167.4	21.33	0.389045
2024-05-31 12:30:00	2491.6	20.63	0.394457	2168.3	21.69	0.405509
2024-05-31 13:00:00	2487.3	20.89	0.39355	2163	22.05	0.414
2024-05-31 13:30:00	2482.5	21.12	0.394457	2156.9	22.37	0.415911
2024-05-31 14:00:00	2477	21.38	0.392645	2149.2	22.69	0.412098
2024-05-31 14:30:00	2471.2	21.59	0.39355	2140.7	22.99	0.406443
2024-05-31 15:00:00	2465.4	21.75	0.392645	2132.1	23.27	0.399945
2024-05-31 15:30:00	2460	21.86	0.390841	2124.4	23.55	0.392645
2024-05-31 16:00:00	2454.5	21.97	0.391742	2116.8	23.81	0.384592
2024-05-31 16:30:00	2449.3	22.08	0.390841	2108.7	24.14	0.379315
2024-05-31 17:00:00	2444.2	22.18	0.390841	2101.1	24.43	0.372392
2024-05-31 17:30:00	2439.6	22.2	0.390841	2093.4	24.56	0.366438
2024-05-31 18:00:00	2435.2	22.16	0.389045	2086	24.6	0.360579
2024-05-31 18:30:00	2432.1	21.98	0.389045	2079.1	24.54	0.352371
2024-05-31 19:00:00	2430.4	21.76	0.387258	2073.2	24.27	0.345144
2024-05-31 19:30:00	2429.2	21.55	0.386367	2068.8	23.95	0.339625
2024-05-31 20:00:00	2428.1	21.41	0.384592	2065.4	23.61	0.334195
2024-05-31 20:30:00	2427.2	21.3	0.387258	2062.7	23.29	0.328095
2024-05-31 21:00:00	2426.1	21.16	0.386367	2060.6	22.95	0.32434
2024-05-31 21:30:00	2425.8	20.93	0.385478	2058.7	22.52	0.320627
2024-05-31 22:00:00	2425.6	20.63	0.385478	2057.2	22.09	0.316957
2024-05-31 22:30:00	2426	20.35	0.384592	2056	21.69	0.311889
2024-05-31 23:00:00	2426.1	20.1	0.383707	2055.4	21.31	0.30761
2024-05-31 23:30:00	2427.1	19.85	0.384592	2054.4	20.94	0.304789
2024-06-01	2426.8	19.6	0.384592	2053.8	20.56	0.302691
2024-06-01 00:30:00	2427	19.35	0.381944	2053.2	20.18	0.299226
2024-06-01 01:00:00	2427.8	19.13	0.382825	2052.5	19.82	0.296483
2024-06-01 01:30:00	2427.5	19.05	0.383707	2051.9	19.61	0.293765
2024-06-01 02:00:00	2427.3	18.89	0.382825	2051.3	19.42	0.291072
2024-06-01 02:30:00	2428	18.72	0.382825	2050.9	19.19	0.28774
2024-06-01 03:00:00	2427.6	18.6	0.381944	2050.4	19.01	0.286418
2024-06-01 03:30:00	2427.2	18.58	0.381066	2050.1	18.94	0.284446
2024-06-01 04:00:00	2427.4	18.45	0.379315	2049.5	18.77	0.281838
2024-06-01 04:30:00	2427	18.4	0.377572	2048.7	18.7	0.281838
2024-06-01 05:00:00	2427	18.36	0.378443	2048.6	18.7	0.28119
2024-06-01 05:30:00	2426.4	18.24	0.381066	2048.2	18.6	0.277971
2024-06-01 06:00:00	2426	18.2	0.381066	2047.7	18.6	0.277332
2024-06-01 06:30:00	2426	18.15	0.379315	2047.2	18.52	0.276694
2024-06-01 07:00:00	2425.2	18.18	0.379315	2046.6	18.53	0.276058
2024-06-01 07:30:00	2454.2	18.29	0.399025	2048.8	18.64	0.274789
2024-06-01 08:00:00	2498.7	18.65	0.401791	2056.8	19	0.274157
2024-06-01 08:30:00	2498.2	18.74	0.395367	2060.7	19.22	0.272898
2024-06-01 09:00:00	2497	18.8	0.395367	2066.7	19.35	0.275423
2024-06-01 09:30:00	2495.8	18.97	0.392645	2073.1	19.57	0.277971
2024-06-01 10:00:00	2493.4	19.27	0.39355	2077.5	19.95	0.280543
2024-06-01 10:30:00	2490.8	19.56	0.391742	2080	20.33	0.283792
2024-06-01 11:00:00	2487.7	19.88	0.394457	2080.6	20.74	0.287078
2024-06-01 11:30:00	2484.5	20.17	0.394457	2080.2	21.13	0.289068
2024-06-01 12:00:00	2480.9	20.42	0.39355	2079	21.49	0.291743
2024-06-01 12:30:00	2477.2	20.62	0.39355	2077.4	21.81	0.292415
2024-06-01 13:00:00	2473.5	20.85	0.39355	2075.6	22.15	0.293765
2024-06-01 13:30:00	2468.9	21.11	0.392645	2073.2	22.49	0.293765
2024-06-01 14:00:00	2464.9	21.39	0.39355	2070.4	22.85	0.293765
2024-06-01 14:30:00	2460.2	21.63	0.392645	2067.4	23.15	0.293765
2024-06-01 15:00:00	2455.5	21.81	0.39355	2063.9	23.42	0.293089
2024-06-01 15:30:00	2451	21.96	0.39355	2059	23.66	0.290402
2024-06-01 16:00:00	2446.5	22.1	0.391742	2053.3	23.86	0.286418
2024-06-01 16:30:00	2441.3	22.2	0.390841	2047.4	24.07	0.282488
2024-06-01 17:00:00	2436.8	22.3	0.391742	2041.9	24.28	0.277332
2024-06-01 17:30:00	2433	22.33	0.391742	2037.4	24.4	0.273527
2024-06-01 18:00:00	2430	22.27	0.390841	2033.8	24.35	0.271644
2024-06-01 18:30:00	2427.1	22.1	0.389045	2030.9	24.23	0.267917
2024-06-01 19:00:00	2425	21.87	0.389045	2028.7	24	0.264241
2024-06-01 19:30:00	2424.3	21.69	0.385478	2026.9	23.66	0.260615
2024-06-01 20:00:00	2423.3	21.55	0.385478	2025.5	23.32	0.258821
2024-06-01 20:30:00	2422.9	21.39	0.387258	2024.6	22.96	0.256448
2024-06-01 21:00:00	2422	21.15	0.386367	2023.7	22.57	0.253513
2024-06-01 21:30:00	2421.7	20.87	0.382825	2023	22.14	0.251189
2024-06-01 22:00:00	2421.8	20.59	0.384592	2022.7	21.74	0.250611
2024-06-01 22:30:00	2422.6	20.34	0.385478	2022.3	21.37	0.247742
2024-06-01 23:00:00	2422.2	20.12	0.383707	2022.2	21.03	0.246037
2024-06-01 23:30:00	2421.7	19.92	0.382825	2022	20.72	0.245471
2024-06-02	2422.5	19.71	0.381944	2022.1	20.41	0.244343
2024-06-02 00:30:00	2422.8	19.54	0.382825	2021.9	20.15	0.24322
2024-06-02 01:00:00	2422.9	19.37	0.381944	2021.9	19.91	0.240436
2024-06-02 01:30:00	2422.9	19.23	0.380189	2021.6	19.7	0.239332
2024-06-02 02:00:00	2422.1	19.07	0.381944	2021.7	19.5	0.238232
2024-06-02 02:30:00	2422.3	18.94	0.381944	2021.6	19.34	0.237137
2024-06-02 03:00:00	2422.5	18.78	0.379315	2021.5	19.15	0.234963
2024-06-02 03:30:00	2422.3	18.64	0.380189	2021.4	18.98	0.236048
2024-06-02 04:00:00	2422.6	18.5	0.378443	2021.4	18.82	0.234963
2024-06-02 04:30:00	2422.7	18.4	0.378443	2021.3	18.65	0.232274
2024-06-02 05:00:00	2422.2	18.4	0.379315	2021.1	18.6	0.232809
2024-06-02 05:30:00	2421.7	18.37	0.379315	2020.9	18.6	0.231739
2024-06-02 06:00:00	2421.3	18.28	0.379315	2021	18.56	0.231206
2024-06-02 06:30:00	2421.4	18.2	0.378443	2021	18.5	0.230675
2024-06-02 07:00:00	2420.6	18.29	0.376704	2020.5	18.53	0.229615
2024-06-02 07:30:00	2419.4	18.31	0.377572	2020.6	18.62	0.228034
2024-06-02 08:00:00	2418.2	18.4	0.377572	2020.1	18.74	0.226464
2024-06-02 08:30:00	2416.9	18.48	0.377572	2019.8	18.85	0.225424
2024-06-02 09:00:00	2416.1	18.57	0.377572	2019.4	18.97	0.225424
2024-06-02 09:30:00	2426.5	18.73	0.389045	2019.2	19.21	0.225424
2024-06-02 10:00:00	2557.9	18.98	0.389045	2039.3	19.42	0.22751
2024-06-02 10:30:00	2557.4	19.12	0.357273	2073.4	19.57	0.230675
2024-06-02 11:00:00	2555.7	19.22	0.353997	2098.2	19.77	0.238232
2024-06-02 11:30:00	2553.7	19.37	0.353183	2108.3	20.03	0.249459
2024-06-02 12:00:00	2552.3	19.51	0.35156	2112.4	20.26	0.258821
2024-06-02 12:30:00	2550.7	19.6	0.348337	2113.8	20.4	0.267917
2024-06-02 13:00:00	2548.7	19.75	0.346737	2114.3	20.58	0.274789
2024-06-02 13:30:00	2547.2	19.87	0.345144	2113.8	20.75	0.282488
2024-06-02 14:00:00	2545.5	19.9	0.343558	2113.1	20.8	0.28774
2024-06-02 14:30:00	2544.2	20	0.341979	2112.3	20.83	0.292415
2024-06-02 15:00:00	2543	20.04	0.341979	2111	20.9	0.296483
2024-06-02 15:30:00	2541.5	20.1	0.342768	2109.6	20.9	0.298538
2024-06-02 16:00:00	2540.4	20.1	0.342768	2108.2	20.9	0.301301
2024-06-02 16:30:00	2539.2	20.15	0.341979	2107.2	20.9	0.303389
2024-06-02 17:00:00	2538.2	20.2	0.341979	2105.8	20.92	0.302691
2024-06-02 17:30:00	2537.1	20.25	0.341193	2104.3	21	0.304789
2024-06-02 18:00:00	2535.7	20.3	0.340408	2103.1	21	0.306196
2024-06-02 18:30:00	2535.1	20.3	0.340408	2102.3	20.97	0.306196
2024-06-02 19:00:00	2534	20.2	0.338844	2101.3	20.86	0.306902
2024-06-02 19:30:00	2533.3	20.16	0.339625	2100.5	20.72	0.304789
2024-06-02 20:00:00	2532.8	20.1	0.339625	2099.9	20.56	0.305492
2024-06-02 20:30:00	2532.3	19.99	0.338844	2099.1	20.43	0.306196
2024-06-02 21:00:00	2531.9	19.85	0.338065	2098.7	20.24	0.305492
2024-06-02 21:30:00	2531.4	19.69	0.338065	2098.2	20.01	0.304789
2024-06-02 22:00:00	2531.5	19.51	0.336512	2097.8	19.76	0.304789
2024-06-02 22:30:00	2531.2	19.33	0.338844	2097.6	19.52	0.304089
2024-06-02 23:00:00	2531.3	19.14	0.337287	2097.5	19.31	0.302691
2024-06-02 23:30:00	2531.1	18.97	0.336512	2097.5	19.1	0.302691
2024-06-03	2531.1	18.82	0.335738	2097.2	18.93	0.302691
2024-06-03 00:30:00	2530.9	18.8	0.334195	2096.9	18.87	0.301995
2024-06-03 01:00:00	2530.6	18.67	0.334965	2096.7	18.76	0.300608
2024-06-03 01:30:00	2530.4	18.6	0.337287	2096.3	18.62	0.299226
2024-06-03 02:00:00	2530.2	18.54	0.337287	2096	18.65	0.298538
2024-06-03 02:30:00	2529.9	18.43	0.336512	2095.7	18.56	0.299916
2024-06-03 03:00:00	2529.6	18.4	0.337287	2095.4	18.5	0.299916
2024-06-03 03:30:00	2529	18.37	0.337287	2094.8	18.52	0.299916
2024-06-03 04:00:00	2528.8	18.29	0.336512	2094.7	18.46	0.299226
2024-06-03 04:30:00	2528.5	18.21	0.334965	2094	18.43	0.298538
2024-06-03 05:00:00	2527.8	18.2	0.333426	2093.5	18.41	0.297852
2024-06-03 05:30:00	2527.4	18.2	0.33266	2093.1	18.4	0.296483
2024-06-03 06:00:00	2526.7	18.12	0.331894	2092.5	18.39	0.294442
2024-06-03 06:30:00	2526.3	18.1	0.33266	2091.8	18.34	0.293765
2024-06-03 07:00:00	2525.8	18.1	0.333426	2091.2	18.4	0.293765
2024-06-03 07:30:00	2525	18.1	0.333426	2090.8	18.3	0.295121
2024-06-03 08:00:00	2524.5	18.03	0.334195	2089.7	18.3	0.293089
2024-06-03 08:30:00	2523.6	18	0.334195	2088.8	18.3	0.292415
2024-06-03 09:00:00	2522.5	18.05	0.333426	2087.5	18.34	0.292415
2024-06-03 09:30:00	2521.5	18.26	0.333426	2087.4	18.6	0.291743
2024-06-03 10:00:00	2603.7	18.36	0.331131	2149.5	18.71	0.303389
2024-06-03 10:30:00	2613.4	18.47	0.31842	2187.6	18.89	0.338065
2024-06-03 11:00:00	2611.5	18.72	0.317687	2196.2	19.28	0.362243
2024-06-03 11:30:00	2609.5	18.96	0.314775	2198	19.6	0.376704
2024-06-03 12:00:00	2608.9	19.26	0.316957	2197.1	19.95	0.383707
2024-06-03 12:30:00	2610.1	19.54	0.31989	2193.7	20.31	0.386367
2024-06-03 13:00:00	2606.7	19.79	0.319154	2188.6	20.64	0.386367
2024-06-03 13:30:00	2601.9	19.97	0.317687	2181.6	20.91	0.382825
2024-06-03 14:00:00	2596.5	20.15	0.311172	2173.9	21.16	0.376704
2024-06-03 14:30:00	2591.7	20.28	0.311172	2166.5	21.36	0.372392
2024-06-03 15:00:00	2587.4	20.42	0.308319	2159.9	21.55	0.365595
2024-06-03 15:30:00	2582.8	20.54	0.306902	2153.7	21.73	0.36141
2024-06-03 16:00:00	2578.5	20.69	0.305492	2146.3	21.92	0.355631
2024-06-03 16:30:00	2574.4	20.8	0.301301	2140	22.03	0.34914
2024-06-03 17:00:00	2571.7	20.8	0.299226	2135.2	22.1	0.345939
2024-06-03 17:30:00	2569.8	20.78	0.297167	2131	22	0.340408
2024-06-03 18:00:00	2567.7	20.7	0.297852	2127.8	21.92	0.337287
2024-06-03 18:30:00	2566	20.65	0.295121	2125.4	21.77	0.334195
2024-06-03 19:00:00	2564.3	20.47	0.291743	2123.2	21.5	0.33037
2024-06-03 19:30:00	2562.9	20.28	0.291743	2121.6	21.21	0.327341
2024-06-03 20:00:00	2561.7	20.15	0.291743	2120.2	20.95	0.32434
2024-06-03 20:30:00	2560.8	20	0.290402	2119.1	20.72	0.320627
2024-06-03 21:00:00	2560.4	19.83	0.287078	2118.1	20.48	0.31842
2024-06-03 21:30:00	2560.1	19.62	0.28774	2117.2	20.21	0.3155
2024-06-03 22:00:00	2559.5	19.42	0.286418	2116.5	19.9	0.314051
2024-06-03 22:30:00	2559.2	19.2	0.283792	2115.8	19.59	0.311889
2024-06-03 23:00:00	2558.7	19.1	0.284446	2115.2	19.43	0.309742
2024-06-03 23:30:00	2558.3	18.97	0.280543	2114.6	19.29	0.308319
2024-06-04	2558.1	18.82	0.283792	2114.1	19.1	0.306902
2024-06-04 00:30:00	2557.3	18.74	0.283139	2113.4	19	0.304089
2024-06-04 01:00:00	2557.1	18.58	0.283139	2112.9	18.85	0.304089
2024-06-04 01:30:00	2556.4	18.5	0.279898	2112	18.8	0.301995
2024-06-04 02:00:00	2555.6	18.4	0.279898	2111.4	18.68	0.299916
2024-06-04 02:30:00	2555.5	18.3	0.281838	2110.7	18.6	0.299916
2024-06-04 03:00:00	2554.7	18.28	0.28119	2110.1	18.58	0.299226
2024-06-04 03:30:00	2554.4	18.18	0.280543	2109.1	18.47	0.297167
2024-06-04 04:00:00	2553.7	18.1	0.279898	2108.5	18.4	0.293765
2024-06-04 04:30:00	2553.4	18.07	0.279898	2108	18.4	0.293765
2024-06-04 05:00:00	2552.4	18	0.279898	2107.4	18.34	0.293089
2024-06-04 05:30:00	2552.1	17.93	0.279254	2106.7	18.3	0.293089
2024-06-04 06:00:00	2551.5	17.9	0.277332	2106	18.3	0.291743
2024-06-04 06:30:00	2550.9	17.9	0.276058	2105	18.22	0.289068
2024-06-04 07:00:00	2550	17.9	0.276058	2104	18.3	0.289734
2024-06-04 07:30:00	2549.2	17.9	0.276058	2102.9	18.3	0.28774
2024-06-04 08:00:00	2548.5	17.9	0.276058	2101.8	18.3	0.284446
2024-06-04 08:30:00	2547.4	17.93	0.275423	2100.8	18.34	0.285102
2024-06-04 09:00:00	2546.4	18.04	0.276058	2099.1	18.44	0.285102
2024-06-04 09:30:00	2597	18.26	0.276694	2102.2	18.7	0.282488
2024-06-04 10:00:00	2706.5	18.51	0.230144	2134.9	19.02	0.291743
2024-06-04 10:30:00	2700.8	18.66	0.209411	2174.6	19.29	0.314775
2024-06-04 11:00:00	2705.6	18.77	0.193197	2250	19.43	0.382825
2024-06-04 11:30:00	2697.5	18.93	0.190546	2262.7	19.61	0.414
2024-06-04 12:00:00	2693.5	19.08	0.190108	2260.7	19.84	0.410204
2024-06-04 12:30:00	2689.6	19.33	0.190546	2256.1	20.13	0.399025
2024-06-04 13:00:00	2686.1	19.54	0.190985	2250.4	20.39	0.38815
2024-06-04 13:30:00	2683.5	19.69	0.191426	2245.5	20.62	0.377572
2024-06-04 14:00:00	2681	19.83	0.191867	2240.8	20.82	0.369828
2024-06-04 14:30:00	2678	19.95	0.191867	2236.5	20.97	0.36141
2024-06-04 15:00:00	2675.8	20.05	0.191426	2231.9	21.13	0.353997
2024-06-04 15:30:00	2673.2	20.14	0.190985	2227.7	21.23	0.347536
2024-06-04 16:00:00	2670.1	20.22	0.190546	2223.2	21.34	0.341979
2024-06-04 16:30:00	2664.5	20.31	0.190108	2218.3	21.46	0.336512
2024-06-04 17:00:00	2661.5	20.42	0.188365	2213	21.59	0.33037
2024-06-04 17:30:00	2658.5	20.52	0.187932	2207.7	21.73	0.325837
2024-06-04 18:00:00	2655.2	20.61	0.187068	2202.7	21.85	0.320627
2024-06-04 18:30:00	2651.4	20.67	0.18578	2196.6	21.9	0.316957
2024-06-04 19:00:00	2648.6	20.6	0.187068	2191.9	21.86	0.312608
2024-06-04 19:30:00	2646	20.6	0.187068	2187.9	21.8	0.30761
2024-06-04 20:00:00	2644.2	20.6	0.186638	2185	21.74	0.304789
2024-06-04 20:30:00	2642	20.6	0.18578	2182.3	21.7	0.301301
2024-06-04 21:00:00	2639.8	20.58	0.184502	2180.4	21.58	0.298538
2024-06-04 21:30:00	2638.2	20.46	0.184502	2179.1	21.39	0.296483
2024-06-04 22:00:00	2636.8	20.29	0.185353	2178.1	21.13	0.294442
2024-06-04 22:30:00	2635.2	20.13	0.184502	2177.3	20.89	0.291072
2024-06-04 23:00:00	2634.4	19.94	0.184927	2177	20.61	0.290402
2024-06-04 23:30:00	2633.2	19.75	0.18281	2176.2	20.35	0.288403
2024-06-05	2632.5	19.56	0.184077	2175.5	20.1	0.286418
2024-06-05 00:30:00	2631.8	19.38	0.184077	2175	19.81	0.283792
2024-06-05 01:00:00	2631.4	19.17	0.183654	2174.7	19.54	0.283792
2024-06-05 01:30:00	2630.5	18.99	0.184077	2174.1	19.32	0.280543
2024-06-05 02:00:00	2629.9	18.83	0.183654	2173.9	19.1	0.279898
2024-06-05 02:30:00	2629.6	18.7	0.181552	2173.7	18.93	0.279254
2024-06-05 03:00:00	2629.1	18.68	0.181552	2172.9	18.9	0.278612
2024-06-05 03:30:00	2628.2	18.6	0.18239	2172.1	18.84	0.276058
2024-06-05 04:00:00	2627.8	18.5	0.18281	2171.4	18.75	0.277332
2024-06-05 04:30:00	2626.9	18.49	0.18239	2170.5	18.7	0.276058
2024-06-05 05:00:00	2626.2	18.39	0.18239	2169.8	18.66	0.276058
2024-06-05 05:30:00	2625.7	18.3	0.18281	2169.2	18.6	0.273527
2024-06-05 06:00:00	2625.2	18.3	0.18239	2168.3	18.6	0.271644
2024-06-05 06:30:00	2624.6	18.26	0.18281	2167.4	18.56	0.269153
2024-06-05 07:00:00	2623.8	18.3	0.18281	2166.3	18.61	0.271644
2024-06-05 07:30:00	2622.7	18.31	0.18281	2165.1	18.72	0.270396
2024-06-05 08:00:00	2621.7	18.4	0.183231	2163.5	18.81	0.269774
2024-06-05 08:30:00	2620.6	18.49	0.18239	2161.8	18.96	0.269153
2024-06-05 09:00:00	2618.9	18.65	0.181552	2159.3	19.2	0.267301
2024-06-05 09:30:00	2616.5	18.92	0.183654	2156.3	19.53	0.263027
2024-06-05 10:00:00	2613.4	19.26	0.183231	2152.6	19.94	0.263633
2024-06-05 10:30:00	2610.1	19.62	0.18281	2148.6	20.38	0.265461
2024-06-05 11:00:00	2606.4	19.92	0.18239	2143.4	20.79	0.263027
2024-06-05 11:30:00	2602	20.2	0.18239	2137.7	21.17	0.261818
2024-06-05 12:00:00	2597.8	20.48	0.18239	2131.3	21.56	0.259418
2024-06-05 12:30:00	2592.6	20.75	0.184077	2124.5	21.94	0.25704
2024-06-05 13:00:00	2586.9	21	0.184502	2116.2	22.27	0.25527
2024-06-05 13:30:00	2580.9	21.25	0.184077	2106.3	22.59	0.251768
2024-06-05 14:00:00	2607.5	21.46	0.194984	2105	22.88	0.247742
2024-06-05 14:30:00	2698.6	21.3	0.212814	2222.8	22.39	0.297852
2024-06-05 15:00:00	2687.8	21.42	0.199526	2242.9	22.44	0.319154
2024-06-05 15:30:00	2678.3	21.64	0.194536	2235.6	22.85	0.3155
2024-06-05 16:00:00	2670.6	21.84	0.193197	2223.7	23.26	0.30761
2024-06-05 16:30:00	2662.2	21.97	0.191867	2209.2	23.6	0.299226
2024-06-05 17:00:00	2654.5	22.1	0.188365	2194.9	23.89	0.290402
2024-06-05 17:30:00	2647.6	22.18	0.18578	2182.3	24.09	0.283792
2024-06-05 18:00:00	2641.4	22.19	0.184502	2170.9	24.2	0.277332
2024-06-05 18:30:00	2636.3	22.04	0.18281	2161.3	24.09	0.27227
2024-06-05 19:00:00	2632.3	21.79	0.181552	2154.8	23.8	0.267917
2024-06-05 19:30:00	2629.7	21.55	0.181134	2150.4	23.46	0.262422
2024-06-05 20:00:00	2626.6	21.37	0.179473	2146.7	23.16	0.259418
2024-06-05 20:30:00	2625.3	21.24	0.176604	2144.4	22.9	0.256448
2024-06-05 21:00:00	2624.2	21.13	0.177419	2142.6	22.65	0.253513
2024-06-05 21:30:00	2623.8	20.96	0.176198	2140.9	22.37	0.252348
2024-06-05 22:00:00	2623.1	20.75	0.175792	2139.6	22.04	0.249459
2024-06-05 22:30:00	2622.6	20.48	0.174582	2138.8	21.65	0.247742
2024-06-05 23:00:00	2621.5	20.2	0.175388	2138.4	21.24	0.246604
2024-06-05 23:30:00	2621.3	19.91	0.174582	2138.2	20.82	0.245471
2024-06-06	2620.7	19.62	0.172982	2137.7	20.4	0.243781
2024-06-06 00:30:00	2620.3	19.44	0.172982	2137	20.09	0.242103
2024-06-06 01:00:00	2619.9	19.28	0.17378	2136.3	19.87	0.239332
2024-06-06 01:30:00	2618.7	19.1	0.172982	2135.8	19.61	0.238781
2024-06-06 02:00:00	2616.2	18.92	0.17338	2135.4	19.38	0.237137
2024-06-06 02:30:00	2615.6	18.8	0.17338	2134.6	19.21	0.236592
2024-06-06 03:00:00	2615	18.76	0.172982	2133.9	19.15	0.234963
2024-06-06 03:30:00	2614.7	18.63	0.172584	2133.2	19.02	0.234963
2024-06-06 04:00:00	2614.3	18.6	0.172187	2132.4	18.97	0.233884
2024-06-06 04:30:00	2613.5	18.52	0.171791	2131.7	18.87	0.234963
2024-06-06 05:00:00	2612.9	18.42	0.171791	2130.8	18.8	0.232809
2024-06-06 05:30:00	2612.2	18.38	0.170608	2129.9	18.76	0.231739
2024-06-06 06:00:00	2611.7	18.3	0.170608	2129.1	18.7	0.230675
2024-06-06 06:30:00	2611	18.21	0.170216	2127.8	18.62	0.231206
2024-06-06 07:00:00	2610.1	18.2	0.170216	2126.5	18.61	0.230675
2024-06-06 07:30:00	2609.3	18.22	0.170216	2125.3	18.7	0.230144
2024-06-06 08:00:00	2608	18.34	0.169824	2123.8	18.86	0.229087
2024-06-06 08:30:00	2606.3	18.5	0.169044	2121.2	19.12	0.228034
2024-06-06 09:00:00	2603.8	18.74	0.168655	2118.6	19.44	0.22751
2024-06-06 09:30:00	2600.8	19.05	0.169044	2115.9	19.82	0.225424
2024-06-06 10:00:00	2661	19.46	0.189671	2126.1	20.17	0.226986
2024-06-06 10:30:00	2702.3	19.78	0.196789	2153	20.52	0.233346
2024-06-06 11:00:00	2690.2	20.12	0.190108	2168.4	20.97	0.24322
2024-06-06 11:30:00	2684	20.4	0.188365	2174	21.37	0.248886
2024-06-06 12:00:00	2676.5	20.65	0.186638	2173.5	21.75	0.251189
2024-06-06 12:30:00	2668.4	20.88	0.184502	2169	22.1	0.253513
2024-06-06 13:00:00	2658.9	21.1	0.181134	2163.2	22.4	0.25293
2024-06-06 13:30:00	2649.8	21.31	0.178238	2157.1	22.7	0.251189
2024-06-06 14:00:00	2642.2	21.54	0.176198	2150.1	23	0.249459
2024-06-06 14:30:00	2634.4	21.74	0.174181	2142.3	23.27	0.24322
2024-06-06 15:00:00	2626.6	21.92	0.171002	2133.8	23.51	0.240991
2024-06-06 15:30:00	2620.2	22.05	0.171002	2125	23.79	0.238781
2024-06-06 16:00:00	2614.3	22.18	0.170216	2116	24.12	0.235505
2024-06-06 16:30:00	2608.6	22.33	0.169044	2106.6	24.47	0.231739
2024-06-06 17:00:00	2602.7	22.47	0.167109	2096.1	24.82	0.229087
2024-06-06 17:30:00	2595.2	22.6	0.166341	2084.8	25.06	0.222844
2024-06-06 18:00:00	2589.1	22.6	0.166341	2073.9	25.18	0.219786
2024-06-06 18:30:00	2584.4	22.6	0.165959	2064.5	25.16	0.213304
2024-06-06 19:00:00	2580.8	22.52	0.163682	2056.6	25.03	0.207491
2024-06-06 19:30:00	2577.8	22.33	0.164816	2050.7	24.77	0.203704
2024-06-06 20:00:00	2576	22.09	0.163305	2046.7	24.39	0.199986
2024-06-06 20:30:00	2574.3	21.87	0.163305	2043.9	24	0.196789
2024-06-06 21:00:00	2573.3	21.73	0.161808	2041.9	23.63	0.194536
[truncated: 3,194 more rows]

## Sheet: Snowden
z6-16673	Port 1	Port 1	Port 1	Port 2	Port 2	Port 2	Port 5	Port 5	Port 5
Timestamp	raw Raw VWC	°C Soil Temperature	mS/cm Bulk EC	raw Raw VWC	°C Soil Temperature	mS/cm Bulk EC	raw Raw VWC	°C Soil Temperature	mS/cm Bulk EC
2024-04-10	1916.4	17.84	0.0152055	2266.5	18.26	0.15417	1884.3	17.82	0.0183654
2024-04-10 00:30:00	1916.5	17.68	0.0156315	2266.8	18.14	0.154882	1883.8	17.7	0.0184502
2024-04-10 01:00:00	1916.1	17.55	0.0155597	2266.8	18.01	0.15417	1884.3	17.58	0.018281
2024-04-10 01:30:00	1916	17.41	0.0152757	2266.9	17.88	0.153815	1884.2	17.44	0.0184927
2024-04-10 02:00:00	1915.8	17.3	0.0149968	2266.8	17.8	0.154525	1884.2	17.4	0.0184077
2024-04-10 02:30:00	1915.8	17.3	0.0149968	2266.7	17.7	0.154525	1884.1	17.3	0.0186209
2024-04-10 03:00:00	1915.3	17.21	0.0151356	2266.4	17.62	0.154525	1884	17.28	0.0185353
2024-04-10 03:30:00	1915.5	17.11	0.0151705	2266.1	17.53	0.154525	1884	17.14	0.0183231
2024-04-10 04:00:00	1915.1	17.06	0.0152405	2265.6	17.44	0.15417	1883.8	17.09	0.0181552
2024-04-10 04:30:00	1915.1	16.98	0.0152055	2265.2	17.39	0.15417	1883.8	17.06	0.0181134
2024-04-10 05:00:00	1914.9	16.9	0.0151356	2264.7	17.3	0.15417	1883.7	16.99	0.0180302
2024-04-10 05:30:00	1914.4	16.8	0.0149968	2264.1	17.2	0.153815	1883.8	16.9	0.0179887
2024-04-10 06:00:00	1914.4	16.77	0.0149968	2263.2	17.11	0.153109	1883.6	16.84	0.0179887
2024-04-10 06:30:00	1914.1	16.72	0.0149624	2262.1	17.1	0.151356	1883.4	16.84	0.0179887
2024-04-10 07:00:00	1913.9	16.81	0.0149968	2260.7	17.1	0.151356	1883.4	16.99	0.0179061
2024-04-10 07:30:00	1913.7	16.85	0.0149968	2258.6	17.08	0.151705	1883	17.11	0.0171002
2024-04-10 08:00:00	1913	17	0.0148252	2255.7	17.14	0.152055	1882.8	17.33	0.0171002
2024-04-10 08:30:00	1912.5	17.32	0.0145211	2251.4	17.26	0.150661	1882	17.78	0.0169824
2024-04-10 09:00:00	1911.2	17.94	0.0140605	2244.7	17.62	0.148936	1881.1	18.57	0.0164437
2024-04-10 09:30:00	1910.4	18.61	0.0140281	2236.3	18.1	0.147231	1879.8	19.44	0.0159956
2024-04-10 10:00:00	1909.1	19.16	0.0139637	2227.5	18.56	0.145211	1878.5	20.28	0.0159956
2024-04-10 10:30:00	1908	19.3	0.0139959	2219	18.72	0.143219	1877.7	20.43	0.0155955
2024-04-10 11:00:00	1907.1	19.4	0.0139637	2210.3	18.86	0.141254	1876.9	20.44	0.0149968
2024-04-10 11:30:00	1906.7	19.72	0.0139637	2200.4	19.17	0.138995	1876.1	20.65	0.0149968
2024-04-10 12:00:00	1906	20.29	0.0137721	2189.2	19.69	0.136144	1875.3	21.26	0.0149279
2024-04-10 12:30:00	1904.8	21	0.013366	2177	20.37	0.13213	1874	22.19	0.0141254
2024-04-10 13:00:00	2067.2	20.98	0.0389045	2351.5	20.42	0.164059	2108.3	24.29	0.0774462
2024-04-10 13:30:00	2237.5	19.92	0.0526017	2514.9	19.49	0.163305	2102.3	23.41	0.0739605
2024-04-10 14:00:00	2202.4	20.2	0.0465586	2480.9	20	0.146218	2079.7	22.78	0.0672977
2024-04-10 14:30:00	2181	20.71	0.0436516	2458.1	20.61	0.137721	2061.6	22.75	0.0625173
2024-04-10 15:00:00	2162.4	21.2	0.0414954	2439.1	21.25	0.131826	2045.5	23.12	0.0586138
2024-04-10 15:30:00	2147.2	21.53	0.0403645	2422.2	21.72	0.128233	2031	23.43	0.0554626
2024-04-10 16:00:00	2134.7	21.95	0.038815	2407.1	22.03	0.126183	2019.1	23.59	0.0529663
2024-04-10 16:30:00	2124	22.21	0.0377572	2393.6	22.32	0.124738	2009	23.65	0.0506991
2024-04-10 17:00:00	2115.3	22.2	0.0369828	2380.3	22.59	0.124165	1999.9	23.43	0.0489779
2024-04-10 17:30:00	2108.3	22.15	0.0362243	2367.2	22.84	0.12388	1991.9	23.19	0.0473151
2024-04-10 18:00:00	2103	21.92	0.0359749	2354.6	23	0.123595	1985.3	22.76	0.0461318
2024-04-10 18:30:00	2098.7	21.67	0.0353183	2345.8	23.05	0.123595	1980.4	22.32	0.0447713
2024-04-10 19:00:00	2095.7	21.31	0.0349945	2344.4	22.64	0.12388	1977.6	21.73	0.0440555
2024-04-10 19:30:00	2093.7	20.88	0.0345144	2345.7	22.01	0.124738	1975.5	21.06	0.0437522
2024-04-10 20:00:00	2092.3	20.62	0.0340408	2348.2	21.54	0.125026	1973.8	20.69	0.0429536
2024-04-10 20:30:00	2090.8	20.44	0.0340408	2350.3	21.18	0.125603	1972.4	20.46	0.042658
2024-04-10 21:00:00	2090	19.98	0.0339625	2352.4	20.65	0.126183	1971.9	19.95	0.0421697
2024-04-10 21:30:00	2089.5	19.39	0.0339625	2354.2	20.13	0.126474	1972	19.42	0.0421697
2024-04-10 22:00:00	2089.2	18.88	0.0338065	2356.2	19.62	0.126765	1971.2	18.91	0.0419759
2024-04-10 22:30:00	2088.9	18.46	0.0338844	2357.3	19.21	0.126474	1971.3	18.49	0.0419759
2024-04-10 23:00:00	2088.4	18.36	0.0331131	2357.9	19.08	0.126183	1970.8	18.37	0.0419759
2024-04-10 23:30:00	2088	18.21	0.0333426	2357.9	18.86	0.126183	1970.7	18.23	0.0414954
2024-04-11	2087.5	18.1	0.033037	2358.2	18.77	0.126183	1970.4	18.17	0.0415911
2024-04-11 00:30:00	2086.9	17.98	0.033037	2358.2	18.61	0.125893	1969.8	18.07	0.0415911
2024-04-11 01:00:00	2086.5	17.9	0.032961	2357.5	18.52	0.125603	1969.3	17.96	0.0410204
2024-04-11 01:30:00	2085.9	17.83	0.032961	2357.6	18.38	0.125314	1968.9	17.84	0.0412098
2024-04-11 02:00:00	2085.2	17.71	0.0328095	2356.9	18.27	0.125026	1968.5	17.72	0.0410204
2024-04-11 02:30:00	2084.9	17.6	0.0327341	2356.9	18.16	0.124738	1968.1	17.63	0.0410204
2024-04-11 03:00:00	2084.2	17.52	0.0325837	2356.1	18.06	0.124165	1967.6	17.55	0.0409261
2024-04-11 03:30:00	2083.6	17.4	0.032434	2355.6	17.92	0.124165	1967.4	17.43	0.0409261
2024-04-11 04:00:00	2083.1	17.31	0.0323594	2354.8	17.88	0.124165	1966.5	17.4	0.0409261
2024-04-11 04:30:00	2082.6	17.3	0.0320627	2354.3	17.8	0.12388	1966.1	17.4	0.0409261
2024-04-11 05:00:00	2081.9	17.26	0.031989	2353	17.79	0.12331	1965.4	17.4	0.040738
2024-04-11 05:30:00	2081.2	17.2	0.031989	2351.7	17.7	0.12218	1964.9	17.31	0.0401791
2024-04-11 06:00:00	2080.7	17.14	0.0317687	2350.4	17.64	0.123027	1964.3	17.27	0.0404576
2024-04-11 06:30:00	2079.8	17.1	0.031989	2349.4	17.6	0.12331	1963.8	17.2	0.0406443
2024-04-11 07:00:00	2078.5	17.1	0.031989	2347.6	17.6	0.123027	1962.6	17.29	0.0399945
2024-04-11 07:30:00	2077.3	17.1	0.0313329	2345	17.51	0.123027	1961	17.3	0.0399945
2024-04-11 08:00:00	2075.3	17.18	0.0311889	2341.9	17.6	0.12218	1959	17.39	0.0395367
2024-04-11 08:30:00	2073.2	17.25	0.0309742	2337.8	17.63	0.121619	1956.5	17.53	0.0389045
2024-04-11 09:00:00	2070.6	17.57	0.0306902	2331.7	17.9	0.120504	1953.5	17.96	0.0382825
2024-04-11 09:30:00	2066.7	18.22	0.0301301	2321.8	18.4	0.11885	1948.9	18.84	0.0374973
2024-04-11 10:00:00	2116.8	18.07	0.0391742	2363.2	18.35	0.143549	1945.9	19.41	0.0368978
2024-04-11 10:30:00	2181.2	16.87	0.0439542	2437.5	17.29	0.167109	1944.7	18.7	0.0368978
2024-04-11 11:00:00	2173.5	16.8	0.0410204	2430.6	17.27	0.158125	1942	18.6	0.036141
2024-04-11 11:30:00	2381.4	18	0.0570164	2515.3	18.35	0.136458	1938.5	18.76	0.0353183
2024-04-11 12:00:00	2485.9	19.1	0.0625173	2582	20.01	0.0931108	1934.8	19.42	0.0343558
2024-04-11 12:30:00	2435.2	19.11	0.0571479	2562	20.23	0.0914113	1930.9	20.16	0.0331131
2024-04-11 13:00:00	2395.6	19.31	0.0534564	2551.1	20.56	0.091622	1926.6	20.92	0.032434
2024-04-11 13:30:00	2361.7	19.84	0.0502343	2541.6	21.03	0.0922571	1922.2	21.91	0.0311172
2024-04-11 14:00:00	2334.8	20.16	0.0481948	2534.3	21.28	0.0928966	1918.2	22	0.0306196
2024-04-11 14:30:00	2310.4	20.3	0.0466659	2529	21.35	0.0937562	2004.3	22.12	0.0935406
2024-04-11 15:00:00	2285.4	21.24	0.0447713	2519.6	22.08	0.0931108	2058.5	23.22	0.11272
2024-04-11 15:30:00	2263.6	21.76	0.0432514	2512.3	22.55	0.0937562	2058.2	23.73	0.104472
2024-04-11 16:00:00	2247.8	21.64	0.042462	2508.5	22.44	0.0954993	2054.4	23.17	0.0993116
2024-04-11 16:30:00	2237.1	21.19	0.0418794	2507.5	22.01	0.097499	2051.1	22.33	0.0961612
2024-04-11 17:00:00	2229.7	20.93	0.0412098	2506.9	21.74	0.0990832	2048.5	21.96	0.0924698
2024-04-11 17:30:00	2223.3	20.81	0.0408319	2506.4	21.67	0.09977	2045.6	21.87	0.0895365
2024-04-11 18:00:00	2219	20.57	0.0402717	2506.2	21.44	0.101158	2043.4	21.53	0.0881049
2024-04-11 18:30:00	2215.8	20.2	0.0399945	2506.9	21.04	0.101859	2041.5	20.98	0.0864968
2024-04-11 19:00:00	2213	20	0.0399025	2507.1	20.88	0.102802	2039.7	20.69	0.084918
2024-04-11 19:30:00	2211	19.79	0.0392645	2507.6	20.69	0.102802	2038.7	20.45	0.0837529
2024-04-11 20:00:00	2209.2	19.59	0.0390841	2508.1	20.43	0.103039	2037.6	20.2	0.0827942
2024-04-11 20:30:00	2207.7	19.42	0.0389942	2508.2	20.1	0.103514	2036.4	19.92	0.0816582
2024-04-11 21:00:00	2206.2	19.07	0.0387258	2509	19.65	0.103992	2035.9	19.54	0.0809096
2024-04-11 21:30:00	2205.2	18.73	0.0384592	2509.9	19.26	0.104232	2035.8	19.18	0.0805378
2024-04-11 22:00:00	2204.6	18.44	0.0381944	2510.8	18.96	0.104713	2035.6	18.84	0.0799834
2024-04-11 22:30:00	2203.6	18.39	0.0381944	2511.2	18.87	0.104232	2035.3	18.67	0.0794328
2024-04-11 23:00:00	2203.2	18.29	0.0380189	2511.3	18.73	0.104232	2034.8	18.5	0.0790679
2024-04-11 23:30:00	2202	18.17	0.0379315	2511.7	18.61	0.104232	2034.5	18.37	0.0787046
2024-04-12	2201.7	18.1	0.0377572	2511.4	18.48	0.104232	2034.3	18.22	0.077983
2024-04-12 00:30:00	2200.3	18.02	0.0378443	2511.7	18.35	0.104472	2033.9	18.13	0.0778037
2024-04-12 01:00:00	2199.4	17.94	0.0379315	2511.3	18.29	0.104472	2033.5	18.04	0.0770903
2024-04-12 01:30:00	2199	17.89	0.0374973	2511.6	18.2	0.103992	2032.8	17.99	0.0765597
2024-04-12 02:00:00	2197.5	17.8	0.0370681	2511.2	18.11	0.104472	2032.6	17.9	0.0758578
2024-04-12 02:30:00	2197.2	17.76	0.0371535	2511	18.08	0.104232	2031.8	17.84	0.0762079
2024-04-12 03:00:00	2196.3	17.7	0.0369828	2510.9	18	0.104472	2031.1	17.8	0.0760326
2024-04-12 03:30:00	2195.7	17.62	0.0368978	2510.7	17.93	0.104472	2030.7	17.71	0.0760326
2024-04-12 04:00:00	2194.7	17.6	0.0369828	2510.4	17.9	0.104472	2030	17.7	0.0756833
2024-04-12 04:30:00	2194.1	17.6	0.0369828	2510.1	17.89	0.104713	2029.3	17.66	0.0756833
2024-04-12 05:00:00	2192.9	17.51	0.0369828	2510.1	17.8	0.104713	2029	17.6	0.0751623
2024-04-12 05:30:00	2192.2	17.44	0.0365595	2509.7	17.74	0.104472	2028.4	17.52	0.0749894
2024-04-12 06:00:00	2191.3	17.4	0.0360579	2509.6	17.7	0.104713	2028	17.47	0.074817
2024-04-12 06:30:00	2189.7	17.4	0.036141	2509	17.68	0.104472	2027.6	17.45	0.0744732
2024-04-12 07:00:00	2188.1	17.43	0.0359749	2508.4	17.66	0.104232	2026.4	17.54	0.0737904
2024-04-12 07:30:00	2186.2	17.5	0.0358922	2507.7	17.74	0.104232	2024.8	17.63	0.0731139
2024-04-12 08:00:00	2183.7	17.51	0.0356451	2506.7	17.7	0.104232	2022.8	17.7	0.0721107
2024-04-12 08:30:00	2181	17.61	0.0355631	2505.6	17.7	0.104232	2020.7	17.79	0.0716143
2024-04-12 09:00:00	2178	17.76	0.0349945	2503.9	17.85	0.104232	2018.3	17.97	0.0704693
2024-04-12 09:30:00	2173.4	18.15	0.034435	2500.4	18.28	0.103753	2014.1	18.51	0.069024
2024-04-12 10:00:00	2168.4	18.73	0.0340408	2495.7	18.81	0.103039	2009.1	19.27	0.0674528
2024-04-12 10:30:00	2162	19.01	0.0338065	2490.5	19.12	0.102802	2003	19.71	0.0660693
2024-04-12 11:00:00	2155.3	19.12	0.0334195	2485.4	19.28	0.103039	1997.4	19.87	0.0647143
2024-04-12 11:30:00	2149.2	19.38	0.032961	2479.4	19.5	0.103039	1991.5	20.08	0.0632412
2024-04-12 12:00:00	2143.1	19.58	0.032434	2473.2	19.71	0.103276	1986.5	20.2	0.0615177
2024-04-12 12:30:00	2136.4	19.84	0.0321366	2466.9	19.94	0.103039	1981.2	20.43	0.0599791
2024-04-12 13:00:00	2150.8	20.08	0.0341979	2462.5	20.17	0.103992	2066.9	20.84	0.0855067
2024-04-12 13:30:00	2461.3	19.76	0.0606736	2618.2	19.13	0.10617	2221.1	21.15	0.140929
2024-04-12 14:00:00	2407.3	20.03	0.0542001	2570	19.23	0.0918333	2175.9	20.64	0.124165
2024-04-12 14:30:00	2370.8	20.15	0.0505825	2554.1	19.63	0.0893305	2151.1	20.5	0.113501
2024-04-12 15:00:00	2346.5	20.23	0.0484172	2544.6	20.02	0.0879023	2131.8	20.6	0.106414
2024-04-12 15:30:00	2329.1	20.36	0.0470977	2537.6	20.3	0.0870964	2116.8	20.7	0.101391
2024-04-12 16:00:00	2314.8	20.42	0.0456037	2532.3	20.47	0.0870964	2104.2	20.8	0.0968278
2024-04-12 16:30:00	2302.9	20.53	0.0447713	2526.4	20.69	0.086896	2092	21.05	0.0922571
2024-04-12 17:00:00	2292.5	20.6	0.0438531	2521	20.94	0.0870964	2081.4	21.19	0.0887156
2024-04-12 17:30:00	2283.9	20.59	0.043451	2518.8	20.98	0.0877001	2074	21.07	0.0860994
2024-04-12 18:00:00	2277.4	20.45	0.0429536	2516.8	20.82	0.0881049	2068.4	20.83	0.0841395
2024-04-12 18:30:00	2271.5	20.25	0.0427563	2516.2	20.59	0.0885116	2064	20.52	0.0824138
2024-04-12 19:00:00	2267.4	20.06	0.0422669	2516.1	20.36	0.0889201	2060.6	20.25	0.0807235
2024-04-12 19:30:00	2263.8	20	0.0419759	2515.7	20.27	0.0889201	2057.4	20.15	0.0794328
2024-04-12 20:00:00	2260.1	20.08	0.0418794	2515.2	20.34	0.0889201	2054.5	20.2	0.078343
2024-04-12 20:30:00	2257.5	20.08	0.0410204	2515	20.37	0.0891251	2051.7	20.25	0.0774462
2024-04-12 21:00:00	2254.2	19.8	0.0410204	2514.8	20.15	0.0893305	2050.7	19.98	0.0770903
2024-04-12 21:30:00	2252.1	19.42	0.0409261	2515.1	19.85	0.0897429	2050.5	19.6	0.0767361
2024-04-12 22:00:00	2250.7	19.08	0.0408319	2515.5	19.54	0.0899498	2050	19.27	0.0760326
2024-04-12 22:30:00	2248.6	18.78	0.0406443	2516	19.25	0.0899498	2049.8	18.95	0.0756833
2024-04-12 23:00:00	2247.4	18.49	0.0402717	2516.5	18.97	0.0899498	2049.9	18.64	0.0746449
2024-04-12 23:30:00	2245.8	18.3	0.0399945	2516.3	18.8	0.0899498	2049.5	18.46	0.0751623
2024-04-13	2244.6	18.35	0.0399945	2516.3	18.77	0.0899498	2048.6	18.46	0.0749894
2024-04-13 00:30:00	2243.8	18.24	0.0399025	2516.3	18.63	0.0897429	2048.2	18.34	0.074817
2024-04-13 01:00:00	2242	18.2	0.0397192	2516	18.53	0.0897429	2047.5	18.26	0.0744732
2024-04-13 01:30:00	2240.1	18.04	0.039355	2515.7	18.4	0.0891251	2047.1	18.13	0.074131
2024-04-13 02:00:00	2238.7	17.95	0.0396278	2515.5	18.31	0.0889201	2046.7	18.05	0.0739605
2024-04-13 02:30:00	2237.5	17.82	0.0390841	2515.7	18.2	0.0889201	2046.1	17.99	0.0739605
2024-04-13 03:00:00	2236.3	17.72	0.0391742	2515.2	18.11	0.0891251	2045.9	17.89	0.0737904
2024-04-13 03:30:00	2235.5	17.63	0.0389942	2514.9	18.02	0.0889201	2045	17.8	0.0732825
2024-04-13 04:00:00	2233.4	17.56	0.038815	2514.5	17.96	0.0889201	2044.3	17.74	0.0731139
2024-04-13 04:30:00	2232.6	17.48	0.0389942	2514.2	17.9	0.0889201	2043.7	17.66	0.0729458
2024-04-13 05:00:00	2231.8	17.4	0.038815	2513.7	17.87	0.0889201	2043.2	17.6	0.0724436
2024-04-13 05:30:00	2230.2	17.3	0.0385478	2513.1	17.8	0.0889201	2042.4	17.6	0.0721107
2024-04-13 06:00:00	2229.1	17.16	0.0382825	2512.7	17.75	0.0889201	2041.9	17.52	0.0719449
2024-04-13 06:30:00	2228.2	17.1	0.0381066	2511.9	17.7	0.0885116	2041.3	17.42	0.0717794
2024-04-13 07:00:00	2226.3	17.2	0.0380189	2511.1	17.7	0.0887156	2039.5	17.54	0.0711214
2024-04-13 07:30:00	2224.8	17.28	0.0380189	2509.9	17.66	0.0885116	2037.1	17.6	0.0704693
2024-04-13 08:00:00	2223.4	17.3	0.0380189	2508.7	17.65	0.0885116	2034.3	17.63	0.0696627
2024-04-13 08:30:00	2220.6	17.46	0.0376704	2506.8	17.8	0.0881049	2030.8	17.88	0.0687068
2024-04-13 09:00:00	2217.8	17.95	0.0370681	2502.4	18.2	0.0874984	2025.5	18.59	0.0668344
2024-04-13 09:30:00	2213	18.61	0.0368129	2496.4	18.76	0.0870964	2019.6	19.42	0.065013
2024-04-13 10:00:00	2208.2	19.06	0.0365595	2489.8	19.22	0.0864968	2012.7	20.01	0.0635331
2024-04-13 10:30:00	2202.7	19.21	0.036141	2483.5	19.41	0.0859014	2005.2	20.15	0.06223
2024-04-13 11:00:00	2197	19.45	0.0360579	2475.2	19.7	0.0855067	1998.4	20.41	0.0605341
2024-04-13 11:30:00	2192.1	19.69	0.0358922	2466.8	19.99	0.0851138	1992.3	20.58	0.0588844
2024-04-13 12:00:00	2188.2	19.96	0.0353183	2461	20.23	0.0851138	1986.7	20.84	0.057544
2024-04-13 12:30:00	2184	20.05	0.0354813	2457.2	20.38	0.0855067	1982.7	20.87	0.0566239
2024-04-13 13:00:00	2181.2	20	0.0350752	2454.4	20.4	0.0857038	1979.3	20.76	0.0557186
2024-04-13 13:30:00	2179.1	20.04	0.0349945	2452.8	20.4	0.0860994	1976.3	20.66	0.0549541
2024-04-13 14:00:00	2177.1	20	0.0349945	2451.2	20.4	0.086896	1974	20.54	0.0547016
2024-04-13 14:30:00	2175.4	20	0.0349945	2450	20.4	0.0870964	1971.6	20.5	0.0539511
2024-04-13 15:00:00	2174.1	20	0.034914	2448.2	20.42	0.0870964	1969.7	20.5	0.0532108
2024-04-13 15:30:00	2172.7	20	0.034914	2446.5	20.43	0.0877001	1967.5	20.5	0.0528445
2024-04-13 16:00:00	2171.7	20	0.0347536	2445.1	20.4	0.0879023	1965.3	20.5	0.0521195
2024-04-13 16:30:00	2170.3	20	0.0341979	2442.9	20.43	0.0879023	1963.3	20.53	0.0515229
2024-04-13 17:00:00	2169.4	20	0.0340408	2440.5	20.45	0.0881049	1961.5	20.58	0.0509331
2024-04-13 17:30:00	2168.1	20.09	0.0341193	2438.3	20.52	0.088308	1959.7	20.63	0.0505825
2024-04-13 18:00:00	2167.3	20.15	0.0340408	2436.2	20.56	0.088308	1957.7	20.7	0.0504661
2024-04-13 18:30:00	2166.2	20.02	0.0339625	2434.1	20.49	0.088308	1956	20.59	0.0501187
2024-04-13 19:00:00	2165.3	19.87	0.0339625	2433.3	20.26	0.0889201	1954.7	20.37	0.0500035
2024-04-13 19:30:00	2164.6	19.65	0.0339625	2433.4	20.02	0.0891251	1953.9	20.09	0.0496592
2024-04-13 20:00:00	2164.1	19.52	0.0339625	2433.7	19.86	0.0893305	1953.6	19.88	0.0493174
2024-04-13 20:30:00	2163.9	19.4	0.0338844	2433.7	19.65	0.0897429	1952.7	19.68	0.0490908
2024-04-13 21:00:00	2163.7	19.04	0.0339625	2434.3	19.31	0.0899498	1952.2	19.29	0.0489779
2024-04-13 21:30:00	2163.1	18.64	0.0336512	2435	18.97	0.0899498	1952.3	18.87	0.0488652
2024-04-13 22:00:00	2163.3	18.41	0.0338844	2435.5	18.8	0.0899498	1952.3	18.61	0.0487528
2024-04-13 22:30:00	2163.2	18.38	0.0335738	2435.6	18.67	0.0899498	1952.2	18.52	0.0480839
2024-04-13 23:00:00	2162.9	18.22	0.033266	2435.7	18.5	0.0899498	1952.2	18.34	0.0480839
2024-04-13 23:30:00	2162.9	18.2	0.0331131	2435.4	18.47	0.0899498	1952.1	18.3	0.0479733
2024-04-14	2162.6	18.13	0.0334965	2435.4	18.34	0.0899498	1951.9	18.19	0.0479733
2024-04-14 00:30:00	2162.5	18.05	0.0339625	2434.7	18.26	0.0899498	1952.1	18.11	0.0479733
2024-04-14 01:00:00	2162.3	17.91	0.0335738	2434.3	18.18	0.0899498	1952	18.01	0.0479733
2024-04-14 01:30:00	2161.9	17.83	0.0331894	2433.8	18.1	0.0901571	1951.7	18	0.0479733
2024-04-14 02:00:00	2161.5	17.8	0.033037	2433.1	18.05	0.0899498	1951.8	17.95	0.0479733
2024-04-14 02:30:00	2161.1	17.8	0.033037	2432.7	18	0.0899498	1951.5	17.9	0.047863
2024-04-14 03:00:00	2160.7	17.76	0.033037	2432.1	17.93	0.0899498	1951.4	17.85	0.0479733
2024-04-14 03:30:00	2160.3	17.74	0.033037	2431.8	17.92	0.0899498	1951.2	17.89	0.0479733
2024-04-14 04:00:00	2160.1	17.7	0.033037	2430.9	17.9	0.0899498	1950.4	17.8	0.0477529
2024-04-14 04:30:00	2159.9	17.69	0.033037	2430	17.87	0.0899498	1950.8	17.8	0.0476431
2024-04-14 05:00:00	2159.4	17.6	0.033037	2429.7	17.8	0.0899498	1950.6	17.8	0.0474242
2024-04-14 05:30:00	2159	17.6	0.033037	2428.7	17.8	0.0899498	1950.3	17.72	0.0473151
2024-04-14 06:00:00	2158.6	17.6	0.033037	2428	17.77	0.0899498	1950	17.7	0.0475335
2024-04-14 06:30:00	2158.2	17.52	0.033037	2426.7	17.71	0.0899498	1949.7	17.66	0.0470977
2024-04-14 07:00:00	2157.7	17.6	0.033037	2425.2	17.76	0.0897429	1949.2	17.75	0.0470977
2024-04-14 07:30:00	2157.1	17.6	0.033037	2423.5	17.7	0.0897429	1948	17.76	0.0469894
2024-04-14 08:00:00	2156.4	17.6	0.0328852	2421	17.62	0.0897429	1946.4	17.7	0.0467735
2024-04-14 08:30:00	2155.5	17.66	0.0326588	2416.9	17.7	0.0893305	1944.7	17.83	0.0462381
2024-04-14 09:00:00	2154.3	17.76	0.0323594	2411.9	17.82	0.0889201	1943.1	17.98	0.0460257
2024-04-14 09:30:00	2152.6	18.15	0.0321366	2403.9	18.21	0.0879023	1941	18.54	0.0452898
2024-04-14 10:00:00	2149.9	18.58	0.0320627	2394.3	18.66	0.0870964	1938.7	19.19	0.0446684
2024-04-14 10:30:00	2146.9	19.06	0.0319154	2382.5	19.09	0.0859014	1935.4	19.83	0.0439542
2024-04-14 11:00:00	2143.7	19.23	0.031989	2370.4	19.29	0.0851138	1932.3	20.1	0.0435512
2024-04-14 11:30:00	2139.5	19.43	0.031842	2356.3	19.46	0.0835603	1929.4	20.27	0.0428549
2024-04-14 12:00:00	2135.1	19.55	0.0311889	2339.5	19.65	0.0818465	1926.3	20.31	0.0419759
2024-04-14 12:30:00	2172.8	19.81	0.0342768	2362.7	20.04	0.0905733	2074.7	20.54	0.0756833
2024-04-14 13:00:00	2413.3	19.42	0.0476431	2537	19.47	0.107399	2301.4	19.86	0.12388
2024-04-14 13:30:00	2364.7	19.69	0.0436516	2507.1	19.95	0.0937562	2236.4	20.04	0.10666
2024-04-14 14:00:00	2335.9	20.16	0.041783	2485.6	20.63	0.0879023	2201.6	20.47	0.097499
2024-04-14 14:30:00	2313.4	20.31	0.0403645	2468.6	20.9	0.0847227	2179.1	20.63	0.0918333
2024-04-14 15:00:00	2296.6	20.38	0.039355	2455.1	20.85	0.0826038	2163	20.57	0.0879023
2024-04-14 15:30:00	2283.6	20.34	0.0386367	2444.4	20.74	0.0812831	2150.6	20.53	0.0845279
2024-04-14 16:00:00	2272.1	20.43	0.0379315	2431.7	20.74	0.0794328	2137.9	20.69	0.0814704
2024-04-14 16:30:00	2260.5	20.65	0.0372392	2416.7	20.91	0.0778037	2125.9	20.98	0.0787046
2024-04-14 17:00:00	2251.4	20.7	0.0368978	2401.5	21.15	0.076913	2115.6	21.09	0.0763836
2024-04-14 17:30:00	2244.2	20.6	0.0363915	2389.9	21.27	0.0760326	2107.8	20.87	0.074817
2024-04-14 18:00:00	2238.9	20.35	0.036141	2376.8	21.35	0.0760326	2101.6	20.49	0.0731139
2024-04-14 18:30:00	2235.6	20	0.0359749	2364.8	21.21	0.0760326	2097.2	19.94	0.0719449
2024-04-14 19:00:00	2231.5	19.64	0.0358922	2362	21	0.0760326	2094.2	19.69	0.0714496
2024-04-14 19:30:00	2229.4	19.35	0.0352371	2361.7	20.71	0.0760326	2091.4	19.55	0.0706318
2024-04-14 20:00:00	2226.9	19.19	0.0350752	2362.5	20.29	0.0762079	2089	19.31	0.0699842
2024-04-14 20:30:00	2225.1	19.08	0.0349945	2364.9	19.96	0.0765597	2087.5	19.09	0.0695024
2024-04-14 21:00:00	2223.3	18.81	0.0349945	2367	19.56	0.076913	2086.9	18.71	0.0691831
2024-04-14 21:30:00	2222.2	18.49	0.0349945	2368.7	19.2	0.076913	2086.7	18.36	0.069024
2024-04-14 22:00:00	2221.4	18.32	0.0349945	2370.1	18.98	0.076913	2086.4	18.22	0.0687068
2024-04-14 22:30:00	2220.4	18.2	0.0349945	2370.9	18.79	0.076913	2086.2	18.1	0.0687068
2024-04-14 23:00:00	2219.3	18.07	0.0343558	2371.3	18.62	0.076913	2085.8	17.99	0.0680769
2024-04-14 23:30:00	2218.6	17.93	0.0347536	2371.8	18.44	0.076913	2085.4	17.85	0.0680769
2024-04-15	2217	17.87	0.0347536	2371.6	18.35	0.0767361	2084.8	17.78	0.0680769
2024-04-15 00:30:00	2216.5	17.8	0.0340408	2371.2	18.22	0.0767361	2084.3	17.7	0.0680769
2024-04-15 01:00:00	2215	17.73	0.0339625	2371.1	18.13	0.0762079	2083.6	17.65	0.0679204
2024-04-15 01:30:00	2214.4	17.66	0.0339625	2370.4	18.06	0.0767361	2082.9	17.59	0.0679204
2024-04-15 02:00:00	2213.1	17.6	0.0345144	2369.5	17.96	0.0762079	2082.7	17.5	0.0674528
2024-04-15 02:30:00	2212.5	17.53	0.0341193	2369.1	17.86	0.0762079	2081.8	17.42	0.0676083
2024-04-15 03:00:00	2211.3	17.48	0.0339625	2368.3	17.8	0.0760326	2080.8	17.4	0.0674528
2024-04-15 03:30:00	2210.7	17.4	0.0339625	2367.4	17.8	0.0760326	2080.4	17.4	0.0669885
2024-04-15 04:00:00	2209.8	17.4	0.0340408	2366.4	17.71	0.0758578	2079.5	17.34	0.0669885
2024-04-15 04:30:00	2208.4	17.4	0.0339625	2365	17.68	0.0760326	2079.4	17.3	0.0669885
2024-04-15 05:00:00	2207.6	17.3	0.0338065	2363.5	17.6	0.0755092	2078.1	17.3	0.0669885
2024-04-15 05:30:00	2206.3	17.3	0.0337287	2362.2	17.6	0.0753356	2077.6	17.25	0.0665273
2024-04-15 06:00:00	2205.9	17.22	0.0335738	2360.7	17.55	0.0755092	2076.8	17.2	0.0665273
2024-04-15 06:30:00	2205.2	17.2	0.0338065	2359	17.5	0.0749894	2076.1	17.2	0.0663743
2024-04-15 07:00:00	2203.4	17.2	0.0338844	2356	17.5	0.074817	2074	17.24	0.0659174
2024-04-15 07:30:00	2202.5	17.29	0.0335738	2352.4	17.5	0.0746449	2070.8	17.37	0.065013
2024-04-15 08:00:00	2200.9	17.3	0.0331131	2348.2	17.5	0.0739605	2067.2	17.4	0.0642688
2024-04-15 08:30:00	2199	17.38	0.032961	2342.8	17.52	0.0739605	2064.3	17.52	0.0638263
2024-04-15 09:00:00	2195.8	17.84	0.0327341	2332.1	17.89	0.0726106	2059	18.2	0.0625173
2024-04-15 09:30:00	2191.4	18.28	0.032961	2317.2	18.27	0.0709578	2051.1	18.86	0.0609537
2024-04-15 10:00:00	2185.8	18.7	0.0321366	2301.8	18.67	0.0693426	2043.1	19.36	0.0597035
2024-04-15 10:30:00	2180.9	19.02	0.031989	2287.5	19.01	0.0679204	2037.1	19.71	0.0586138
2024-04-15 11:00:00	2175.9	19.25	0.0316957	2273.9	19.28	0.0668344	2030.7	19.98	0.057544
2024-04-15 11:30:00	2170.7	19.39	0.0313329	2261.2	19.47	0.0657658	2025	20.17	0.0567545
2024-04-15 12:00:00	2165.6	19.68	0.0309742	2247.3	19.78	0.0644169	2019.4	20.5	0.0554626
2024-04-15 12:30:00	2160.2	19.9	0.0309742	2233.2	20.03	0.0626614	2013.6	20.73	0.0544503
2024-04-15 13:00:00	2154.5	20.02	0.0303389	2219.5	20.16	0.0613762	2007.4	20.82	0.0532108
2024-04-15 13:30:00	2149.4	20.16	0.0299916	2205.6	20.3	0.0598412	2001.2	20.85	0.0516416
2024-04-15 14:00:00	2143.3	20.12	0.0299916	2191.5	20.3	0.058479	1995.1	20.65	0.0504661
2024-04-15 14:30:00	2138.1	20.21	0.0295801	2179.1	20.41	0.0566239	1989.1	20.69	0.0493174
2024-04-15 15:00:00	2131.5	20.77	0.0289068	2165.9	21	0.0545758	1981.2	21.7	0.0473151
2024-04-15 15:30:00	2124.5	21.26	0.028774	2152.7	21.5	0.0529663	1973.5	22.37	0.0456037
2024-04-15 16:00:00	2118.1	21.36	0.0279898	2141.9	21.56	0.0515229	1967.1	22.22	0.0445656
2024-04-15 16:30:00	2112.9	21.39	0.0278612	2132.1	21.58	0.0501187	1961.8	22.12	0.0433511
2024-04-15 17:00:00	2108.3	21.27	0.0273527	2123.3	21.6	0.0489779	1957	21.87	0.0425598
2024-04-15 17:30:00	2105.3	21.04	0.0270396	2116.7	21.62	0.0483059	1953.1	21.4	0.0414954
2024-04-15 18:00:00	2103.4	20.68	0.0269774	2109.7	21.56	0.0473151	1949.4	20.83	0.0406443
2024-04-15 18:30:00	2102.2	20.24	0.0269774	2104.2	21.22	0.0466659	1947.4	20.13	0.0399025
2024-04-15 19:00:00	2101.4	19.79	0.0267301	2101.2	20.83	0.0460257	1945.7	19.74	0.0392645
2024-04-15 19:30:00	2100.9	19.45	0.0267301	2099.3	20.58	0.0452898	1944	19.69	0.0387258
2024-04-15 20:00:00	2100.3	19.22	0.026485	2097.9	20.18	0.0450817	1942.9	19.39	0.0384592
2024-04-15 20:30:00	2099.9	19	0.026485	2097.8	19.81	0.044978	1941.5	19.1	0.0381066
2024-04-15 21:00:00	2099.6	18.63	0.0264241	2097.6	19.41	0.0450817	1940.7	18.68	0.0380189
2024-04-15 21:30:00	2099.3	18.23	0.0261216	2098	18.98	0.044978	1940.7	18.23	0.0380189
2024-04-15 22:00:00	2099.3	18.01	0.0262422	2097.9	18.67	0.044978	1940.5	17.95	0.0380189
2024-04-15 22:30:00	2099.2	17.9	0.0261818	2098.1	18.51	0.0450817	1940.2	17.86	0.0379315
2024-04-15 23:00:00	2099	17.77	0.0259418	2097.8	18.32	0.044978	1940.1	17.71	0.0379315
2024-04-15 23:30:00	2098.7	17.67	0.0259418	2097.8	18.17	0.044978	1939.7	17.6	0.0379315
2024-04-16	2098.4	17.6	0.0260615	2097.7	18.06	0.044978	1939.6	17.5	0.037325
2024-04-16 00:30:00	2098	17.52	0.0260016	2097.4	17.96	0.044978	1939.5	17.42	0.0369828
2024-04-16 01:00:00	2097.9	17.42	0.0260615	2097.2	17.88	0.044978	1939.3	17.32	0.0370681
2024-04-16 01:30:00	2097.6	17.32	0.0260016	2096.6	17.8	0.044978	1939.1	17.3	0.0370681
2024-04-16 02:00:00	2097.2	17.3	0.0258821	2096.2	17.72	0.044978	1939.2	17.24	0.0370681
2024-04-16 02:30:00	2096.7	17.24	0.0258821	2095.9	17.65	0.044978	1938.6	17.2	0.0368978
2024-04-16 03:00:00	2096.2	17.2	0.0260016	2095.5	17.6	0.044978	1938.4	17.17	0.0369828
2024-04-16 03:30:00	2095.9	17.14	0.0260016	2095.1	17.52	0.044978	1938.4	17.1	0.0369828
2024-04-16 04:00:00	2095.6	17.1	0.0260016	2094.5	17.5	0.0448745	1938	17.04	0.0369828
2024-04-16 04:30:00	2095.2	17.03	0.0258226	2093.8	17.42	0.0448745	1937.6	17.01	0.0368978
2024-04-16 05:00:00	2094.7	17	0.0256448	2093.1	17.4	0.0448745	1937.4	16.96	0.0364754
2024-04-16 05:30:00	2094.3	17	0.0253513	2092.4	17.4	0.0446684	1937.3	17	0.0365595
2024-04-16 06:00:00	2094	16.9	0.025527	2091.5	17.31	0.0443609	1936.8	16.9	0.0369828
2024-04-16 06:30:00	2093.5	16.9	0.0254097	2090.5	17.3	0.0440555	1936.5	16.91	0.0369828
2024-04-16 07:00:00	2092.7	16.88	0.0258226	2089.3	17.24	0.0440555	1935.7	17	0.0365595
2024-04-16 07:30:00	2092.1	16.85	0.0258226	2087.6	17.2	0.0439542	1933.9	17.08	0.0359749
2024-04-16 08:00:00	2091	16.91	0.0254097	2085.6	17.3	0.0437522	1932.4	17.26	0.0358922
2024-04-16 08:30:00	2089.8	17.01	0.0251768	2083.1	17.36	0.0430527	1930.3	17.41	0.0353997
2024-04-16 09:00:00	2088.4	17.19	0.0250035	2079.9	17.55	0.042462	1928.5	17.67	0.0349945
2024-04-16 09:30:00	2086.5	17.7	0.0248886	2076.2	17.99	0.0418794	1926.2	18.37	0.0347536
2024-04-16 10:00:00	2083.6	18.47	0.0245471	2071.3	18.65	0.0410204	1923.1	19.37	0.0339625
2024-04-16 10:30:00	2080.5	18.78	0.024322	2066.8	19	0.040738	1920.4	19.76	0.033037
2024-04-16 11:00:00	2077.9	18.8	0.0244906	2063.3	19.1	0.0401791	1918.5	19.69	0.033037
2024-04-16 11:30:00	2075.6	18.87	0.0244343	2059.4	19.2	0.0398107	1916.5	19.69	0.0325837
2024-04-16 12:00:00	2072.3	19.19	0.0240436	2054.4	19.46	0.0390841	1914.1	20.03	0.031989
2024-04-16 12:30:00	2069.1	19.47	0.0239883	2050.6	19.74	0.0384592	1912.1	20.41	0.0311172
2024-04-16 13:00:00	2066.1	19.81	0.0239883	2045.8	20.08	0.0379315	1909.9	20.91	0.0303389
2024-04-16 13:30:00	2062.3	20.11	0.0236592	2041	20.38	0.0369828	1908.1	21.22	0.0297852
2024-04-16 14:00:00	2058	20.2	0.0234423	2036.2	20.52	0.036141	1905.4	21.13	0.0290402
2024-04-16 14:30:00	2274.9	21.83	0.0427563	2074.3	20.75	0.054325	2039.8	21.61	0.0666807
2024-04-16 15:00:00	2324.7	21.4	0.0414	2115.9	20.62	0.0651628	2077.3	20.63	0.0776247
2024-04-16 15:30:00	2295.3	20.5	0.0378443	2117.9	20.25	0.063387	2070.1	19.79	0.0755092
2024-04-16 16:00:00	2278.5	19.83	0.0363915	2116.9	20.1	0.0613762	2063.1	19.58	0.072778
2024-04-16 16:30:00	2267.3	19.9	0.0349945	2115.8	20.23	0.0597035	2055.9	19.84	0.0706318
2024-04-16 17:00:00	2257.4	20.09	0.0341193	2113	20.48	0.0583445	2047.6	20.27	0.0680769
2024-04-16 17:30:00	2249.1	20	0.0334965	2110.5	20.5	0.0572796	2039.8	20.25	0.0659174
2024-04-16 18:00:00	2241.5	19.8	0.0331894	2107.3	20.36	0.0561048	2032.7	20.04	0.0639735
2024-04-16 18:30:00	2235.9	19.54	0.032961	2104.7	20.12	0.0554626	2026.9	19.63	0.0626614
2024-04-16 19:00:00	2230.5	19.29	0.0325087	2101.7	19.83	0.0544503	2021.9	19.34	0.0606736
2024-04-16 19:30:00	2226.1	19.11	0.0320627	2099.3	19.75	0.0534564	2017.7	19.39	0.0594292
2024-04-16 20:00:00	2222.8	18.96	0.031989	2097.8	19.62	0.052723	2013.8	19.15	0.0582103
2024-04-16 20:30:00	2219.3	18.76	0.0316957	2097.2	19.29	0.0526017	2010.7	18.81	0.0574116
2024-04-16 21:00:00	2217.1	18.52	0.0313329	2096.4	18.93	0.0526017	2009.2	18.38	0.0570164
2024-04-16 21:30:00	2215.8	18.34	0.0310456	2096.3	18.65	0.0522396	2008.4	18.08	0.0567545
2024-04-16 22:00:00	2214.1	18.2	0.0310456	2096.3	18.44	0.0519996	2007.9	17.86	0.0559758
2024-04-16 22:30:00	2212	18.1	0.0309742	2096.1	18.32	0.05188	2007.3	17.8	0.0559758
2024-04-16 23:00:00	2210.2	17.95	0.0311172	2095.8	18.15	0.0519996	2006.5	17.72	0.0554626
2024-04-16 23:30:00	2208.9	17.78	0.030903	2095.5	18.01	0.0516416	2006	17.6	0.0552077
2024-04-17	2207.2	17.64	0.0309742	2095.1	17.9	0.0510505	2005.6	17.47	0.0550808
2024-04-17 00:30:00	2205.8	17.55	0.0304789	2094.4	17.8	0.0509331	2005.2	17.4	0.0549541
2024-04-17 01:00:00	2204.4	17.48	0.0306196	2094.1	17.79	0.0508159	2004.4	17.36	0.0548277
2024-04-17 01:30:00	2203	17.36	0.030761	2093.4	17.68	0.0505825	2004	17.26	0.0545758
2024-04-17 02:00:00	2201.4	17.24	0.0301301	2092.6	17.6	0.0502343	2003.4	17.17	0.0545758
2024-04-17 02:30:00	2200.3	17.15	0.0301301	2092.1	17.5	0.0501187	2002.7	17.1	0.0539511
2024-04-17 03:00:00	2199.3	17.1	0.0299916	2091.6	17.5	0.0500035	2002	17.02	0.0539511
2024-04-17 03:30:00	2198.3	17.02	0.0299916	2090.8	17.41	0.0500035	2001.4	17	0.053827
2024-04-17 04:00:00	2197.5	16.94	0.0299916	2090.1	17.35	0.0496592	2000.6	16.92	0.053827
2024-04-17 04:30:00	2196.1	16.87	0.0299916	2089.5	17.3	0.0493174	1999.8	16.85	0.0534564
2024-04-17 05:00:00	2195.3	16.8	0.0299916	2088.7	17.3	0.0489779	1999.1	16.8	0.0534564
2024-04-17 05:30:00	2193.8	16.73	0.0299226	2087.6	17.25	0.0489779	1998.4	16.7	0.0535797
2024-04-17 06:00:00	2192.9	16.7	0.0295121	2086.4	17.2	0.0487528	1997.8	16.7	0.0530884
2024-04-17 06:30:00	2191.8	16.7	0.0291072	2085.1	17.2	0.0486407	1996.8	16.7	0.0529663
2024-04-17 07:00:00	2189.9	16.7	0.0289734	2083.4	17.2	0.0480839	1994.3	16.85	0.0521195
2024-04-17 07:30:00	2188.1	16.7	0.0291072	2081.6	17.19	0.0479733	1990.1	16.99	0.0511682
2024-04-17 08:00:00	2185.5	16.66	0.0290402	2078.9	17.06	0.0472063	1986.3	17.06	0.0503501
2024-04-17 08:30:00	2182.3	17	0.0284446	2075.5	17.22	0.0465586	1981.2	17.56	0.0489779
2024-04-17 09:00:00	2177.3	17.49	0.0279898	2070.8	17.63	0.0453942	1975.6	18.27	0.047863
2024-04-17 09:30:00	2172	18.13	0.0279898	2065.6	18.29	0.044157	1969.2	19.16	0.0466659
2024-04-17 10:00:00	2166.6	18.6	0.0279898	2060.2	18.81	0.0431519	1962.8	19.8	0.0456037
2024-04-17 10:30:00	2160.7	18.7	0.0279254	2055.4	18.99	0.0423643	1956.8	19.85	0.0445656
2024-04-17 11:00:00	2155.6	18.61	0.0277332	2050.3	18.86	0.0412098	1951.6	19.52	0.0432514
2024-04-17 11:30:00	2150	18.74	0.0269774	2045.1	18.99	0.0399025	1946.9	19.44	0.0421697
2024-04-17 12:00:00	2143.8	18.98	0.0268534	2039.9	19.34	0.0389942	1942.2	19.74	0.0408319
2024-04-17 12:30:00	2137.7	19.36	0.0261216	2034.8	19.91	0.0378443	1937.1	20.37	0.0394457
2024-04-17 13:00:00	2131.3	19.82	0.0259418	2030.2	20.6	0.0368978	1932.1	21.57	0.0376704
2024-04-17 13:30:00	2125.1	20.35	0.0259418	2024.8	21.22	0.0358922	1927.3	22.52	0.0363078
2024-04-17 14:00:00	2118	20.83	0.0251189	2020.2	21.8	0.0350752	1922.6	22.48	0.0354813
2024-04-17 14:30:00	2110.9	21.33	0.0246037	2015.6	22.27	0.0341979	1918.3	22.94	0.0345939
2024-04-17 15:00:00	2103.7	21.82	0.0239883	2011.3	22.68	0.0333426	1914.7	23.69	0.0331131
2024-04-17 15:30:00	2096.6	22.21	0.0234423	2007.1	22.96	0.0328852	1910.7	25.03	0.03155
2024-04-17 16:00:00	2089.4	22.39	0.0232274	2003.8	23	0.0321366	1907.6	25.15	0.030761
2024-04-17 16:30:00	2083.2	22.48	0.0230144	2000.3	23.03	0.0317687	1905	24.78	0.0299916
2024-04-17 17:00:00	2077.8	22.37	0.0229087	1997.1	23.25	0.0313329	1903	24.21	0.0293089
2024-04-17 17:30:00	2073.9	22.18	0.0226464	1994	23.42	0.0309742	1901	23.51	0.0287078
2024-04-17 18:00:00	2070.9	21.91	0.022182	1991.8	23.46	0.0309742	1899.4	22.87	0.0279898
2024-04-17 18:30:00	2068.8	21.64	0.0220293	1989.7	23.18	0.0302691	1897.7	22.3	0.0273527
2024-04-17 19:00:00	2067.1	21.29	0.0219786	1988.1	22.55	0.0299916	1897	21.55	0.0267917
2024-04-17 19:30:00	2066.2	20.87	0.0219786	1987	21.79	0.0297167	1896.3	20.77	0.0261216
2024-04-17 20:00:00	2065.6	20.48	0.021928	1985.8	21.23	0.0293765	1895.8	20.27	0.0259418
2024-04-17 20:30:00	2065.2	20.22	0.0217771	1985.1	20.85	0.0293089	1895.2	19.98	0.0253513
2024-04-17 21:00:00	2064.9	19.74	0.021928	1984.6	20.33	0.0290402	1895.2	19.47	0.0251768
2024-04-17 21:30:00	2064.6	19.33	0.0214783	1984.6	19.89	0.0289734	1894.7	19.05	0.0251768
2024-04-17 22:00:00	2064.5	18.97	0.0212324	1984.2	19.5	0.0289734	1894.4	18.73	0.0250035
2024-04-17 22:30:00	2064.4	18.65	0.0215774	1984.1	19.14	0.0289734	1894.5	18.41	0.0248886
2024-04-17 23:00:00	2064.3	18.34	0.0214783	1984.1	18.8	0.0289068	1894.2	18.13	0.0248886
2024-04-17 23:30:00	2064.4	18.21	0.0215774	1983.6	18.65	0.0286418	1894	18.08	0.0248886
2024-04-18	2064.1	18.18	0.0211836	1983.7	18.49	0.0285759	1893.8	17.94	0.0248886
2024-04-18 00:30:00	2063.9	18.05	0.0211349	1983.4	18.32	0.0284446	1893.6	17.81	0.024322
2024-04-18 01:00:00	2063.9	18.01	0.0211349	1983	18.23	0.0280543	1893.2	17.81	0.0239883
2024-04-18 01:30:00	2063.6	17.9	0.0210378	1983	18.1	0.0279898	1893.4	17.73	0.0240436
2024-04-18 02:00:00	2063.4	17.81	0.0209894	1982.4	18	0.0279898	1893	17.67	0.0239883
2024-04-18 02:30:00	2063.3	17.74	0.0210378	1982.2	17.94	0.0280543	1892.9	17.64	0.0240991
2024-04-18 03:00:00	2063.1	17.66	0.0211349	1981.9	17.85	0.0279898	1893.1	17.57	0.0239883
2024-04-18 03:30:00	2062.8	17.6	0.0212814	1981.5	17.75	0.0280543	1892.6	17.41	0.0239883
2024-04-18 04:00:00	2062.5	17.51	0.0212324	1981.3	17.66	0.0279898	1892.7	17.39	0.0239883
2024-04-18 04:30:00	2062.2	17.43	0.0209894	1981	17.6	0.0279898	1892.6	17.31	0.0235505
2024-04-18 05:00:00	2061.9	17.38	0.0209894	1980.7	17.54	0.0279254	1892.4	17.27	0.0236592
2024-04-18 05:30:00	2061.7	17.27	0.0210863	1980.2	17.49	0.0277332	1892	17.19	0.0239332
2024-04-18 06:00:00	2061.4	17.17	0.0210863	1979.7	17.4	0.0279254	1891.8	17.1	0.0239883
2024-04-18 06:30:00	2061.1	17.08	0.0209894	1979.3	17.34	0.0279898	1892.1	17.02	0.0231739
2024-04-18 07:00:00	2060.4	16.99	0.0209894	1978.8	17.3	0.0278612	1891.4	17.1	0.0230675
2024-04-18 07:30:00	2059.9	16.86	0.0209894	1978.1	17.3	0.0276058	1891.3	17.18	0.0229615
2024-04-18 08:00:00	2058.9	16.8	0.0209894	1977.1	17.3	0.0273527	1890.5	17.16	0.022856
2024-04-18 08:30:00	2057.3	16.93	0.0205589	1975.7	17.42	0.0270396	1889.4	17.44	0.0229087
2024-04-18 09:00:00	2055.1	17.46	0.0204174	1973.8	17.83	0.0269774	1888.6	18.23	0.0222331
2024-04-18 09:30:00	2052.1	17.95	0.0199986	1971.8	18.28	0.0267301	1887.3	18.91	0.0217771
2024-04-18 10:00:00	2048.9	18.39	0.0199526	1969.9	18.81	0.0261216	1886.1	19.53	0.0213304
2024-04-18 10:30:00	2044.9	18.85	0.0199067	1968	19.59	0.0258821	1884.7	20.24	0.0208449
2024-04-18 11:00:00	2040.5	19.38	0.0197697	1965.8	20.18	0.025527	1883.5	21.01	0.0201837
2024-04-18 11:30:00	2035.8	19.98	0.0192309	1963.8	20.89	0.0250035	1881.9	21.72	0.0199067
2024-04-18 12:00:00	2030.3	20.7	0.0190108	1961.8	21.73	0.0249459	1881	22.64	0.0193197
2024-04-18 12:30:00	2024.5	21.51	0.0189234	1960.4	22.68	0.0245471	1879.8	23.8	0.0186209
2024-04-18 13:00:00	2018.2	22.27	0.0181552	1958.1	23.54	0.0240436	1878.2	24.71	0.0180302
2024-04-18 13:30:00	2012.4	23.06	0.0179887	1951.5	24.44	0.0172584	1876.8	25.68	0.0177828
2024-04-18 14:00:00	2006.1	23.65	0.0179473	1950.1	25.32	0.0170216	1875.5	26.34	0.0171002
2024-04-18 14:30:00	2000.1	24.2	0.0175792	1948.3	26.12	0.0169824	1874.4	26.98	0.0167494
2024-04-18 15:00:00	1994.2	24.72	0.0171396	1946.5	26.78	0.0169824	1968.1	27.13	0.054325
2024-04-18 15:30:00	1988.7	25.06	0.0169824	1945	27.29	0.0169824	2171.1	24.39	0.135831
2024-04-18 16:00:00	1983.7	25.23	0.0169824	1943.5	27.31	0.0168267	2117.3	24.97	0.111686
2024-04-18 16:30:00	2262.3	25.97	0.036141	2096.1	26.66	0.0517607	2092.3	25.4	0.100925
2024-04-18 17:00:00	2384.9	25.69	0.0397192	2280.4	25.45	0.0774462	2075	25.36	0.0954993
2024-04-18 17:30:00	2337.8	25.05	0.0365595	2239.2	25.63	0.0682339	2062.8	24.98	0.0914113
2024-04-18 18:00:00	2310.5	24.53	0.0348337	2209.7	26.34	0.0629506	2054	24.57	0.0881049
2024-04-18 18:30:00	2292.2	24.09	0.0335738	2188.2	26.37	0.0595662	2046.7	24.09	0.08531
2024-04-18 19:00:00	2278.9	23.73	0.0327341	2177.2	25.71	0.0566239	2041.4	23.47	0.0827942
2024-04-18 19:30:00	2269.5	23.25	0.0320627	2171.3	24.71	0.0547016	2037.4	22.79	0.0809096
2024-04-18 20:00:00	2261.8	22.6	0.0316228	2168	23.65	0.0533335	2034.4	22.03	0.0792501
2024-04-18 20:30:00	2256.4	21.93	0.0311172	2165.1	22.81	0.0526017	2032.3	21.26	0.0778037
2024-04-18 21:00:00	2252.5	21.39	0.0310456	2162.4	22.27	0.0516416	2030.8	20.68	0.0770903
2024-04-18 21:30:00	2249.3	20.88	0.0306196	2160.1	21.69	0.0510505	2030.4	20.16	0.0762079
2024-04-18 22:00:00	2246.6	20.17	0.0303389	2158.1	20.92	0.0508159	2029.9	19.54	0.0753356
2024-04-18 22:30:00	2244	19.52	0.0300608	2156.6	20.23	0.0501187	2029.8	18.96	0.074817
2024-04-18 23:00:00	2241.9	18.95	0.0299916	2155.2	19.61	0.0497737	2029.3	18.44	0.0739605
2024-04-18 23:30:00	2240.2	18.58	0.0297167	2154	19.25	0.0493174	2029.5	18	0.0732825
2024-04-19	2238	18.38	0.0290402	2152.5	18.96	0.0493174	2028.6	17.8	0.0729458
2024-04-19 00:30:00	2236.1	18.16	0.0290402	2151.2	18.68	0.0489779	2028	17.68	0.072277
2024-04-19 01:00:00	2234.1	18	0.0289734	2149.7	18.46	0.0486407	2027.2	17.6	0.0716143
2024-04-19 01:30:00	2233	17.83	0.0289068	2148.3	18.24	0.0481948	2026.5	17.44	0.0711214
2024-04-19 02:00:00	2231.2	17.77	0.0283139	2147	18.02	0.0479733	2026.2	17.37	0.0709578
2024-04-19 02:30:00	2229.6	17.66	0.0281838	2145.2	17.88	0.0474242	2025.3	17.3	0.0707946
2024-04-19 03:00:00	2227.6	17.54	0.0284446	2144	17.78	0.0469894	2024.7	17.24	0.0701455
2024-04-19 03:30:00	2226.1	17.43	0.0283139	2142.6	17.54	0.0470977	2024	17.14	0.0699842
2024-04-19 04:00:00	2224.4	17.33	0.0279898	2141.1	17.41	0.0468813	2023.3	17.05	0.0699842
2024-04-19 04:30:00	2222.6	17.21	0.0279898	2139.8	17.3	0.0468813	2022.8	16.97	0.0693426
2024-04-19 05:00:00	2221.3	17.13	0.0279898	2138.2	17.19	0.0468813	2022	16.9	0.0688652
2024-04-19 05:30:00	2220.2	17.06	0.0276694	2136.9	17.09	0.0466659	2021.5	16.81	0.0687068
2024-04-19 06:00:00	2218.6	16.93	0.0276694	2135.7	16.92	0.0465586	2020.6	16.77	0.0687068
2024-04-19 06:30:00	2217.4	16.9	0.0278612	2134.3	16.91	0.0464515	2019.8	16.71	0.0685488
2024-04-19 07:00:00	2215.7	16.86	0.0276694	2132.5	17	0.0460257	2018.4	16.84	0.0679204
2024-04-19 07:30:00	2213.8	16.9	0.0272898	2129.8	17.1	0.0456037	2015.4	16.97	0.0671429
2024-04-19 08:00:00	2210.5	17.11	0.0269774	2125.8	17.38	0.044978	2011.9	17.29	0.0662217
2024-04-19 08:30:00	2205.6	17.51	0.0266073	2120.8	17.78	0.0444631	2007.1	17.81	0.0648634
2024-04-19 09:00:00	2199.7	17.84	0.0262422	2113.5	18.24	0.043451	2002	18.24	0.0636796
2024-04-19 09:30:00	2193.5	18.21	0.0260016	2105.9	18.75	0.042658	1995.7	18.76	0.0623735
2024-04-19 10:00:00	2187.4	18.57	0.025704	2098.6	19.15	0.0412098	1989.9	19.31	0.0605341
2024-04-19 10:30:00	2181.3	18.98	0.0251189	2091.5	19.63	0.0402717	1983.6	20.02	0.0591562
2024-04-19 11:00:00	2173.9	19.44	0.0250035	2084.1	20.24	0.0396278	1977.5	20.72	0.0576766
2024-04-19 11:30:00	2165.8	20	0.0249459	2075.6	20.95	0.0384592	1971.2	21.34	0.0562341
2024-04-19 12:00:00	2156.7	20.65	0.0246037	2066.9	21.76	0.0372392	1964.5	22.11	0.0545758
2024-04-19 12:30:00	2147.9	21.35	0.0239883	2058.2	22.62	0.036141	1957.7	23	0.052723
2024-04-19 13:00:00	2138.6	22.06	0.0239332	2048.8	23.37	0.0347536	1950.6	24.11	0.0509331
2024-04-19 13:30:00	2129.6	22.76	0.0230144	2040	24.08	0.0337287	1943.7	25.08	0.049204
2024-04-19 14:00:00	2120.7	23.41	0.022856	2031.4	24.83	0.0325087	1937.4	25.55	0.0475335
2024-04-19 14:30:00	2111.2	24.03	0.022182	2024.1	25.5	0.0313329	1932	26.12	0.0459198
2024-04-19 15:00:00	2102.3	24.59	0.0215774	2017	26.1	0.0303389	1926.4	26.85	0.0443609
2024-04-19 15:30:00	2093.4	25.04	0.0214289	2009.8	26.59	0.0293089	1921	28.12	0.042462
2024-04-19 16:00:00	2085.9	25.31	0.0209894	2003.5	26.79	0.0283792	1916.8	28.11	0.0414954
2024-04-19 16:30:00	2077.9	25.4	0.0204644	1997.8	26.76	0.0277971	1913.2	27.88	0.0401791
2024-04-19 17:00:00	2071.9	25.4	0.0201372	1992.4	27.33	0.0270396	1910.1	27.65	0.0389942
2024-04-19 17:30:00	2066.7	25.26	0.0199986	1987.7	27.92	0.0269774	1908.3	26.97	0.0382825
2024-04-19 18:00:00	2062.6	25.02	0.0199526	1983.6	28.77	0.0263027	1906.9	26.32	0.0372392
2024-04-19 18:30:00	2059.3	24.75	0.0195434	1980.3	28.62	0.0258226	1905.4	25.73	0.0365595
2024-04-19 19:00:00	2057.2	24.44	0.0192309	1978.2	27.76	0.0250611	1904.6	25.09	0.0360579
2024-04-19 19:30:00	2055.6	24.11	0.0190108	1976.5	26.51	0.024322	1903.8	24.42	0.0353183
2024-04-19 20:00:00	2054.6	23.68	0.0190985	1975.1	25.35	0.0239883	1903.6	23.64	0.0349945
2024-04-19 21:00:00	2054.2	22.4	0.0190108	1973.5	23.3	0.0232809	1903.3	21.98	0.0348337
2024-04-19 21:30:00	2054.3	21.46	0.0190108	1972.6	22.3	0.0231206	1903.4	21.14	0.0341193
2024-04-19 22:00:00	2054.6	20.47	0.0190108	1972.3	21.27	0.0229615	1903.6	20.28	0.0339625
2024-04-19 22:30:00	2055	19.87	0.0190108	1971.8	20.54	0.022856	1904.1	19.68	0.0338844
2024-04-19 23:00:00	2055.2	19.47	0.0190108	1971.6	20.08	0.0226986	1904.2	19.3	0.0337287
2024-04-19 23:30:00	2055.3	19.17	0.0189234	1971.4	19.77	0.0228034	1904	19	0.0334965
2024-04-20	2055.4	18.94	0.0188365	1971.5	19.5	0.022751	1904.5	18.7	0.0335738
2024-04-20 00:30:00	2055.4	18.69	0.0190108	1970.7	19.2	0.0225424	1904.4	18.45	0.033037
2024-04-20 01:00:00	2055.3	18.51	0.0187932	1970.6	18.98	0.02208	1904.3	18.31	0.033037
2024-04-20 01:30:00	2055.5	18.39	0.0184502	1969.6	18.8	0.0224905	1904.3	18.2	0.033037
2024-04-20 02:00:00	2055.2	18.25	0.0185353	1969.5	18.63	0.02208	1904.2	18.07	0.033037
2024-04-20 02:30:00	2055.1	18.17	0.0187499	1969.3	18.46	0.0219786	1904.2	17.97	0.0328095
2024-04-20 03:00:00	2055.1	18.03	0.0188365	1968.9	18.31	0.0220293	1904	17.83	0.033037
2024-04-20 03:30:00	2055	17.89	0.0186209	1968.7	18.14	0.0219786	1903.9	17.72	0.032961
2024-04-20 04:00:00	2054.8	17.76	0.0187932	1968	18	0.0219786	1903.7	17.59	0.0327341
2024-04-20 04:30:00	2054.6	17.63	0.0188799	1967.5	17.74	0.0218776	1903.6	17.46	0.0326588
2024-04-20 05:00:00	2054.5	17.43	0.018578	1967.2	17.56	0.021928	1903.4	17.34	0.032961
2024-04-20 05:30:00	2054.4	17.28	0.018239	1966.9	17.41	0.0218776	1903.3	17.24	0.032434
2024-04-20 06:00:00	2054.4	17.14	0.0181134	1966.3	17.3	0.0213796	1903.4	17.14	0.0322849
2024-04-20 06:30:00	2054.2	16.98	0.018281	1965.9	17.14	0.0212814	1903.1	17.04	0.0327341
2024-04-20 07:00:00	2054	16.75	0.0186209	1965.6	17.1	0.0213796	1903.3	16.91	0.032434
2024-04-20 07:30:00	2053.7	16.82	0.0181134	1964.6	17.25	0.0212814	1903.1	17.02	0.0321366
2024-04-20 08:00:00	2052.7	17.31	0.0179887	1963.5	17.73	0.0209894	1902.2	17.61	0.031989
2024-04-20 08:30:00	2050.7	17.6	0.0179887	1962.1	18.05	0.0209894	1901.7	18.02	0.031989
2024-04-20 09:00:00	2048.3	17.81	0.0179473	1959.8	18.4	0.0209894	1900.7	18.29	0.0317687
2024-04-20 09:30:00	2045	18.28	0.0179061	1958	18.95	0.0203704	1899.3	18.93	0.0311172
2024-04-20 10:00:00	2041.7	18.8	0.0177828	1956.4	19.43	0.0199986	1898	19.56	0.0309742
2024-04-20 10:30:00	2038	19.31	0.0178238	1954.1	19.99	0.0199986	1896.5	20.43	0.0304789
2024-04-20 11:00:00	2033.7	20.06	0.0171002	1952.2	20.84	0.0197242	1895	21.51	0.0299916
2024-04-20 11:30:00	2028.1	20.99	0.0169824	1949.9	21.94	0.0190546	1893.3	22.58	0.0291072
2024-04-20 12:00:00	2022.1	21.88	0.0169824	1947.8	22.9	0.0190108	1891.4	23.53	0.0288403
2024-04-20 12:30:00	2016.7	22	0.0169824	1945.4	22.94	0.0190108	1889.9	23.38	0.028119
2024-04-20 13:00:00	2011.5	21.99	0.0165196	1944	22.86	0.0188365	1888.9	23.14	0.0279898
2024-04-20 13:30:00	2007.4	21.76	0.0164816	1942.6	22.5	0.0184502	1887.7	22.53	0.0275423
2024-04-20 14:00:00	2004	21.54	0.0160694	1941.5	22.14	0.0181552	1887	22.05	0.0269774
2024-04-20 14:30:00	2000.9	21.36	0.0159956	1940.3	21.85	0.0179887	1885.7	21.74	0.0266686
2024-04-20 15:00:00	1998.5	21.08	0.0159956	1939.1	21.58	0.0179473	1885.3	21.43	0.0261216
2024-04-20 15:30:00	1996.5	20.9	0.0159956	1938.1	21.36	0.0179887	1885.2	21.23	0.0260016
2024-04-20 16:00:00	1994.6	20.88	0.0159956	1937.4	21.32	0.0179473	1884.8	21.27	0.025704
2024-04-20 16:30:00	1991.5	21.12	0.0158125	1935.9	21.62	0.0176604	1883.8	21.75	0.0254097
2024-04-20 17:00:00	1988.8	21.13	0.015417	1935.3	21.69	0.0171791	1882.9	21.69	0.0249459
2024-04-20 17:30:00	1987.1	20.88	0.015417	1934.4	21.45	0.0172187	1882.6	21.34	0.0247742
2024-04-20 18:00:00	1985.5	20.63	0.0150661	1933.1	21.27	0.0170216	1881.9	20.99	0.0242661
2024-04-20 18:30:00	1983.9	20.38	0.0149968	1932.1	21.71	0.0172187	1881.8	20.68	0.0240991
2024-04-20 19:00:00	1982.6	20.06	0.0149968	1931.4	21.52	0.0171002	1881.6	20.19	0.0239883
2024-04-20 19:30:00	1982.4	19.65	0.0149279	1930.7	20.78	0.0170216	1882	19.7	0.0239883
2024-04-20 20:00:00	1981.7	19.38	0.0147231	1930	20.26	0.0170216	1881.5	19.44	0.0239883
2024-04-20 20:30:00	1981.2	19.14	0.0146555	1929.8	19.86	0.0169824	1881.4	19.22	0.0239883
2024-04-20 21:00:00	1981.2	18.86	0.0149279	1929.4	19.5	0.0169824	1881.7	18.91	0.0237137
2024-04-20 21:30:00	1980.5	18.57	0.0150314	1928.8	19.14	0.0169824	1881.7	18.55	0.0233884
2024-04-20 22:00:00	1980.9	18.36	0.0149279	1928.9	18.82	0.0169824	1882	18.31	0.0231206
2024-04-20 22:30:00	1980.4	18.17	0.0148936	1928.4	18.59	0.0168655	1882	18.14	0.0231206
2024-04-20 23:00:00	1980.4	18.04	0.0149968	1928	18.39	0.0169434	1882.3	17.96	0.0230144
2024-04-20 23:30:00	1980.3	17.91	0.0148936	1927.7	18.19	0.0166725	1882.1	17.8	0.0230144
2024-04-21	1980.3	17.8	0.0149624	1927.6	18.02	0.016788	1882.2	17.67	0.0229615
2024-04-21 00:30:00	1979.8	17.8	0.0149624	1927.5	17.9	0.0169824	1881.9	17.62	0.0229615
2024-04-21 01:00:00	1979.6	17.74	0.0149968	1927	17.83	0.016788	1882	17.59	0.0230144
2024-04-21 01:30:00	1979.5	17.58	0.0149968	1926.9	17.69	0.0165959	1882.1	17.44	0.022856
2024-04-21 02:00:00	1979.2	17.35	0.0148594	1926.4	17.44	0.0162555	1882	17.28	0.0225424
2024-04-21 02:30:00	1979.1	17.07	0.0149968	1926.2	17.19	0.0163682	1882	17.05	0.0228034
2024-04-21 03:00:00	1979.1	16.78	0.0149968	1925.8	16.96	0.0163682	1881.8	16.82	0.0224388
2024-04-21 03:30:00	1979	16.64	0.0149279	1925.8	16.86	0.0164816	1882	16.7	0.0220293
2024-04-21 04:00:00	1978.6	16.42	0.0142889	1925.4	16.7	0.0167494	1882.2	16.56	0.0223357
2024-04-21 04:30:00	1978.5	16.35	0.0142233	1925.4	16.65	0.0167109	1881.8	16.56	0.0223872
2024-04-21 05:00:00	1978.2	16.27	0.0147911	1925	16.6	0.0162555	1881.9	16.49	0.0219786
2024-04-21 05:30:00	1977.8	16.16	0.0148252	1924.6	16.55	0.0160325	1881.7	16.43	0.0219786
2024-04-21 06:00:00	1977.2	16.15	0.0146555	1924.5	16.52	0.0159956	1881.7	16.38	0.0220293
2024-04-21 06:30:00	1977.1	16.07	0.0142561	1924	16.49	0.0159956	1881.6	16.34	0.0221309
2024-04-21 07:00:00	1976.5	16.13	0.0141254	1923.9	16.59	0.0159956	1881.4	16.38	0.021928
2024-04-21 07:30:00	1975.7	16.21	0.0140929	1923.5	16.65	0.0159956	1881.3	16.45	0.021928
2024-04-21 08:00:00	1974.7	16.61	0.0139959	1923.3	16.99	0.0159956	1881.2	16.95	0.021677
2024-04-21 08:30:00	1972.8	17.07	0.0139959	1922.6	17.45	0.0159956	1880.4	17.58	0.0214783
2024-04-21 09:00:00	1971	17.52	0.0139959	1922	17.94	0.0159956	1879.8	18.14	0.0210863
2024-04-21 09:30:00	1968.4	18.15	0.0139316	1921.2	18.62	0.0158489	1879.2	18.91	0.0209894
2024-04-21 10:00:00	1965.9	18.59	0.0139959	1920.3	19.09	0.0157398	1878.5	19.55	0.020893
2024-04-21 10:30:00	1963.5	18.85	0.0139316	1919.4	19.42	0.0157036	1877.6	20.04	0.0204174
2024-04-21 11:00:00	1961.2	19.24	0.0133045	1918.4	19.92	0.0157398	1876.4	20.59	0.0199986
2024-04-21 11:30:00	1958.7	19.82	0.0130617	1917.3	20.66	0.0149968	1875.6	21.26	0.0193197
2024-04-21 12:00:00	1955.5	20.5	0.0130317	1916.7	21.83	0.0149968	1874.9	22.17	0.0190108
2024-04-21 12:30:00	1952.8	21.26	0.0130317	1915.1	22.58	0.0147571	1873.4	23.16	0.0187499
2024-04-21 13:00:00	1949.5	22.03	0.0130017	1913.7	23.25	0.0147571	1872.8	24.16	0.0179887
2024-04-21 13:30:00	1946.3	22.79	0.0127644	1912.6	23.95	0.0145546	1871.7	24.98	0.0174985
2024-04-21 14:00:00	1942.9	23.47	0.0120226	1911.3	24.76	0.0139959	1871	25.64	0.0170216
2024-04-21 14:30:00	1940.5	24.14	0.012106	1910	25.58	0.0139637	1870.3	26.23	0.016788
2024-04-21 15:00:00	1937.2	24.7	0.0121339	1908.7	26.27	0.0135207	1869.2	27.18	0.0158489
2024-04-21 15:30:00	1934.8	25.02	0.0119674	1907.5	26.73	0.0130317	1867.3	28.71	0.0145211
2024-04-21 16:00:00	1932.3	25.07	0.0118032	1906.2	26.61	0.013213	1867.1	28.64	0.0140605
2024-04-21 16:30:00	1930	24.88	0.011298	1905	26.25	0.0130017	1866.8	28.01	0.0139959
2024-04-21 17:00:00	1928.2	24.5	0.0111944	1904.2	26.08	0.0130017	1866.9	26.97	0.0139959
2024-04-21 17:30:00	1926.7	24.1	0.0117761	1904	26.03	0.0131522	1866.6	25.86	0.0139959
2024-04-21 18:00:00	1925.8	23.65	0.0113763	1903.7	26.29	0.0132739	1866.5	24.88	0.0140605
2024-04-21 18:30:00	1924.6	23.14	0.0109901	1903	25.85	0.0130317	1866.6	24	0.014388
2024-04-21 19:00:00	1924.2	22.61	0.0110917	1902.6	24.88	0.0130017	1866.3	23.14	0.014388
2024-04-21 19:30:00	1924.1	22.03	0.011246	1902.5	23.67	0.012942	1866.3	22.26	0.0146218
2024-04-21 20:00:00	1923.8	21.33	0.0109901	1902.3	22.48	0.0127057	1866.3	21.36	0.0146893
2024-04-21 20:30:00	1924.1	20.53	0.0110408	1901.9	21.47	0.0129122	1866.8	20.55	0.014388
2024-04-21 21:00:00	1924.3	19.91	0.0109901	1901.5	20.72	0.0129718	1866.7	19.95	0.0144212
2024-04-21 21:30:00	1924	19.39	0.0110408	1901.5	20.09	0.0130017	1866.8	19.44	0.0149624
2024-04-21 22:00:00	1924.2	18.92	0.0109648	1901.1	19.59	0.012942	1866.9	19.02	0.0148936
2024-04-21 22:30:00	1924.4	18.65	0.0109901	1900.8	19.27	0.0129122	1867.1	18.71	0.0142889
2024-04-21 23:00:00	1924	18.48	0.0110408	1900.6	19.01	0.0128529	1867.1	18.47	0.0143219
2024-04-21 23:30:00	1923.9	18.22	0.0109901	1900.2	18.71	0.0125314	1867.1	18.19	0.0146555
2024-04-22	1923.8	18	0.0106905	1900.1	18.42	0.0125893	1866.7	17.94	0.0147571
2024-04-22 00:30:00	1923.7	17.82	0.0108893	1899.8	18.21	0.0123595	1866.9	17.77	0.0144212
2024-04-22 01:00:00	1923.5	17.69	0.0107399	1899.7	18.06	0.0127938	1866.8	17.68	0.0141906
2024-04-22 01:30:00	1923.3	17.59	0.0107895	1899.5	17.9	0.0127057	1866.9	17.56	0.0139637
2024-04-22 02:00:00	1923.4	17.5	0.0108893	1899.3	17.8	0.0123595	1866.8	17.5	0.0140929
2024-04-22 02:30:00	1923.1	17.48	0.0109901	1899.3	17.74	0.012331	1866.9	17.46	0.0143219
2024-04-22 03:00:00	1923	17.35	0.0108643	1899.1	17.61	0.0121899	1866.6	17.4	0.014388
2024-04-22 03:30:00	1922.8	17.3	0.0108393	1898.8	17.55	0.0121619	1866.9	17.33	0.0141906
2024-04-22 04:00:00	1922.6	17.27	0.0108643	1898.6	17.46	0.0120226	1866.9	17.28	0.0140281
2024-04-22 04:30:00	1922	17.1	0.0108893	1898.3	17.34	0.011995	1866.7	17.19	0.0140281
2024-04-22 05:00:00	1922.2	16.9	0.010666	1898.3	17.15	0.011995	1866.5	17.05	0.0139316
2024-04-22 05:30:00	1922.2	16.8	0.0103039	1898.2	17.1	0.011995	1866.5	16.95	0.0140929
2024-04-22 06:00:00	1921.7	16.71	0.0101391	1898	17.05	0.011995	1866.5	16.9	0.0141906
2024-04-22 06:30:00	1921.6	16.69	0.01	1898	17	0.0120226	1866.3	16.9	0.0141579
2024-04-22 07:00:00	1921.1	16.6	0.0101391	1897.9	17.01	0.0120226	1866.3	16.9	0.0140281
2024-04-22 07:30:00	1921.3	16.81	0.01	1897.6	17.21	0.0120226	1866.1	17.1	0.0140281
2024-04-22 08:00:00	1920.5	17.4	0.0100231	1897	17.72	0.0119399	1866.3	17.77	0.0138357
2024-04-22 08:30:00	1919.4	17.79	0.0100693	1896.6	18.11	0.0119399	1866.1	18.27	0.0138038
2024-04-22 09:00:00	1918.5	17.94	0.0100693	1896.3	18.42	0.0119124	1865.7	18.52	0.0132739
2024-04-22 09:30:00	1917.6	18.52	0.01	1895.8	19.03	0.0114551	1865.4	19.3	0.0130617
2024-04-22 10:00:00	1916.4	19.18	0.01	1895.7	19.72	0.0113763	1865.2	20.23	0.0129718
2024-04-22 10:30:00	1911.6	19.5	0.00952796	1884.3	20.3	0.00881049	1864.6	20.7	0.0128233
2024-04-23 11:30:00	1963.1	22.83	0.00100231	#N/A	#N/A	#N/A	#N/A	#N/A	#N/A
2024-04-23 12:00:00	1877	22.64	0.00143219	1844.4	21.86	0.00134896	#N/A	#N/A	#N/A
2024-04-23 12:30:00	1866.4	21.45	0.0396278	1869.9	21.56	0.00537032	#N/A	#N/A	#N/A
2024-04-23 13:00:00	1853.3	20.88	0.572796	2045.5	21.04	0.00100231	#N/A	#N/A	#N/A
2024-04-23 13:30:00	1899.3	20.15	0.0693426	1923.7	20.26	0.00406443	#N/A	#N/A	#N/A
2024-04-23 14:00:00	1851	18.77	0.00126765	2171.4	19.76	0	#N/A	#N/A	#N/A
2024-04-23 14:30:00	1854.2	20.03	0.00100231	2138.3	20.71	0	#N/A	#N/A	#N/A
2024-04-23 15:00:00	1847	21.22	0	2138.5	21.83	0	#N/A	#N/A	#N/A
2024-04-23 15:30:00	1846.9	21.56	0.00100231	2138.3	22.16	0.00100231	#N/A	#N/A	#N/A
2024-04-23 16:00:00	1846.7	21.63	0	2138.2	22.14	0	#N/A	#N/A	#N/A
2024-04-23 16:30:00	1894.7	21.38	0.00885116	2104.7	21.95	0.00653131	#N/A	#N/A	#N/A
2024-04-30 13:30:00	2081.1	24.02	0.187932	2062.7	24.32	0.175388	2110.7	25.48	0.360579
2024-04-30 14:00:00	2082.5	23.5	0.189234	2065.8	24.1	0.177828	2114.7	24.41	0.381944
2024-04-30 14:30:00	2141.4	22.9	0.284446	2164.3	23.73	0.349945	2275.7	23.58	0.706318
2024-04-30 15:00:00	2176.5	22.8	0.333426	2207.7	23.5	0.43451	2282.4	23.6	0.647143
2024-04-30 15:30:00	2186.5	22.8	0.338065	2210.5	23.41	0.445656	2278.7	23.65	0.595662
2024-04-30 16:00:00	2188.9	22.63	0.337287	2208.1	23.3	0.443609	2276	23.43	0.562341
2024-04-30 16:30:00	2188.8	22.47	0.334965	2204.4	23.27	0.439542	2272.1	23.39	0.537032
2024-04-30 17:00:00	2188.6	22.27	0.331131	2199.3	23.05	0.433511	2268.1	23.24	0.517607
2024-04-30 17:30:00	2187.6	22.08	0.326588	2196.1	22.96	0.427563	2264.5	23.08	0.502343
2024-04-30 18:00:00	2185.9	21.64	0.323594	2191.3	22.76	0.421697	2260.5	22.71	0.490908
2024-04-30 18:30:00	2184.5	20.89	0.31989	2187.1	22.37	0.414954	2256.2	22.25	0.47863
2024-04-30 19:00:00	2182.9	20.28	0.3155	2182.4	21.97	0.408319	2253.2	21.76	0.470977
2024-04-30 19:30:00	2180.9	19.97	0.311172	2179	21.67	0.399945	2250	21.43	0.462381
2024-04-30 20:00:00	2179.1	19.78	0.308319	2175.8	21.5	0.394457	2248	21.23	0.454988
2024-04-30 20:30:00	2177.4	19.59	0.304789	2172.9	21.32	0.389942	2245.6	21.01	0.451856
2024-04-30 21:00:00	2175.6	19.19	0.301995	2170.7	20.92	0.385478	2243.7	20.56	0.448745
2024-04-30 21:30:00	2174.5	18.62	0.300608	2168.9	20.37	0.381066	2242.8	20.06	0.445656
2024-04-30 22:00:00	2173.8	18.08	0.297852	2167.3	19.86	0.378443	2242.3	19.55	0.443609
2024-04-30 22:30:00	2172.9	17.72	0.296483	2165.6	19.4	0.372392	2242.1	19.12	0.44157
2024-04-30 23:00:00	2171.8	17.48	0.293765	2164.4	19.01	0.371535	2241.9	18.74	0.437522
2024-04-30 23:30:00	2170.7	17.3	0.292415	2163.3	18.66	0.367282	2241.6	18.38	0.437522
2024-05-01	2169.5	17.18	0.289734	2161.9	18.39	0.364754	2241.2	18.11	0.436516
2024-05-01 00:30:00	2168.5	17.08	0.289734	2160.6	18.16	0.363078	2240.8	17.88	0.433511
2024-05-01 01:00:00	2166.9	16.93	0.286418	2159.7	17.92	0.359749	2240.1	17.65	0.433511
2024-05-01 01:30:00	2165.7	16.9	0.285102	2158.7	17.73	0.358096	2239.5	17.43	0.433511
2024-05-01 02:00:00	2164.5	16.82	0.284446	2157.4	17.56	0.355631	2238.9	17.26	0.431519
2024-05-01 02:30:00	2163.1	16.8	0.283139	2156.2	17.42	0.353997	2238.1	17.12	0.431519
2024-05-01 03:00:00	2161.8	16.73	0.279254	2154.9	17.26	0.35156	2237.2	16.95	0.431519
2024-05-01 03:30:00	2160.6	16.65	0.279898	2153.7	17.14	0.349945	2236.4	16.83	0.430527
2024-05-01 04:00:00	2159.3	16.6	0.277971	2152.4	17.04	0.346737	2235.6	16.71	0.429536
2024-05-01 04:30:00	2158.2	16.6	0.277332	2151.1	16.92	0.345144	2234.8	16.6	0.428549
2024-05-01 05:00:00	2156.9	16.54	0.273527	2150	16.83	0.342768	2233.8	16.52	0.428549
2024-05-01 05:30:00	2155.6	16.5	0.275423	2148.8	16.74	0.340408	2232.8	16.41	0.428549
2024-05-01 06:00:00	2154.3	16.5	0.27227	2147.8	16.7	0.338844	2231.7	16.35	0.429536
2024-05-01 06:30:00	2153.2	16.52	0.271644	2146.2	16.66	0.336512	2230.4	16.32	0.429536
2024-05-01 07:00:00	2151.6	16.77	0.270396	2144.8	16.85	0.333426	2229.1	16.63	0.42462
2024-05-01 07:30:00	2149.9	17.07	0.267917	2143.4	17.26	0.331894	2226.7	17.12	0.42462
2024-05-01 08:00:00	2148	17.43	0.26485	2141.6	17.74	0.328852	2224.3	17.63	0.423643
2024-05-01 08:30:00	2146.1	17.89	0.263633	2139.9	18.33	0.326588	2221.2	18.23	0.422669
2024-05-01 09:00:00	2143.7	18.56	0.261818	2138.8	19.35	0.323594	2217.4	19.28	0.420727
2024-05-01 09:30:00	2141.1	19.62	0.260615	2137.4	20.4	0.323594	2212.6	20.64	0.419759
2024-05-01 10:00:00	2137.5	21.12	0.259418	2134.9	21.3	0.321366	2206.5	21.88	0.421697
2024-05-01 10:30:00	2133.8	21.88	0.257632	2132.2	21.98	0.31842	2201.8	22.43	0.422669
2024-05-01 11:00:00	2130.5	22.11	0.25704	2129.2	22.47	0.3155	2197.2	22.73	0.420727
2024-05-01 11:30:00	2128.4	22.29	0.254683	2125.8	22.76	0.312608	2192.9	23	0.423643
2024-05-01 12:00:00	2125.4	22.62	0.25293	2122.7	22.94	0.310456	2188.8	23.34	0.421697
2024-05-01 12:30:00	2122.8	22.9	0.250035	2119.9	23.06	0.305492	2185.1	23.56	0.423643
2024-05-01 13:00:00	2120.6	22.87	0.247742	2117.1	23.1	0.302691	2181.4	23.6	0.423643
2024-05-01 13:30:00	2118.4	22.81	0.246604	2114.6	23.19	0.297852	2177.9	23.6	0.423643
2024-05-01 14:00:00	2115.9	22.76	0.242661	2112	23.2	0.295121	2175	23.56	0.422669
2024-05-01 14:30:00	2114.4	22.55	0.24322	2109.7	23.2	0.291072	2172.6	23.42	0.422669
2024-05-01 15:00:00	2112.3	22.42	0.240436	2107.6	23.12	0.288403	2170.6	23.28	0.422669
2024-05-01 15:30:00	2110.8	22.15	0.238232	2105.4	23.03	0.285102	2168.1	23.15	0.421697
2024-05-01 16:00:00	2109.5	21.92	0.237137	2103.4	23	0.282488	2165.6	23.02	0.41783
2024-05-01 16:30:00	2107.8	21.71	0.234423	2101.7	22.94	0.278612	2163.3	22.96	0.41783
2024-05-01 17:00:00	2106.1	21.55	0.233346	2099.7	22.81	0.275423	2160.5	22.77	0.419759
2024-05-01 17:30:00	2104.7	21.48	0.230144	2097.9	22.78	0.272898	2158.4	22.68	0.419759
2024-05-01 18:00:00	2103.7	21.08	0.22856	2096.4	22.6	0.269153	2156	22.36	0.419759
2024-05-01 18:30:00	2103.1	20.4	0.225944	2094.8	22.21	0.267301	2154.1	21.79	0.418794
2024-05-01 19:00:00	2102.5	19.82	0.224905	2093.5	21.76	0.264241	2153.1	21.25	0.41783
2024-05-01 19:30:00	2102	19.55	0.222331	2092.1	21.49	0.261818	2152	21.03	0.413048
2024-05-01 20:00:00	2101.3	19.5	0.221309	2091.2	21.4	0.258226	2150.7	21	0.41115
2024-05-01 20:30:00	2100.5	19.42	0.220293	2090.3	21.28	0.25527	2149.3	20.9	0.41115
2024-05-01 21:00:00	2100	19	0.217771	2089.3	20.95	0.254097	2147.9	20.46	0.412098
2024-05-01 21:30:00	2099.7	18.4	0.218776	2088.6	20.41	0.252348	2146.8	19.88	0.410204
2024-05-01 22:00:00	2099.5	17.85	0.21727	2087.8	19.85	0.250035	2146.4	19.33	0.410204
2024-05-01 22:30:00	2099.1	17.6	0.21727	2087.1	19.44	0.247742	2145.6	18.94	0.410204
2024-05-01 23:00:00	2098.6	17.36	0.215774	2086.4	19.07	0.244906	2145.2	18.59	0.40738
2024-05-01 23:30:00	2098	17.24	0.214783	2086	18.77	0.24322	2144.7	18.31	0.408319
2024-05-02	2097.5	17.17	0.214783	2085.2	18.51	0.241546	2144.1	18.05	0.40738
2024-05-02 00:30:00	2096.9	17.07	0.213796	2084.6	18.31	0.239883	2143.6	17.84	0.405509
2024-05-02 01:00:00	2096.3	17.04	0.213304	2084	18.15	0.239332	2142.9	17.72	0.40738
2024-05-02 01:30:00	2095.8	17.04	0.210863	2083.7	18.02	0.237684	2142.4	17.58	0.406443
2024-05-02 02:00:00	2095.2	16.99	0.209411	2083.4	17.9	0.236048	2141.8	17.48	0.404576
2024-05-02 02:30:00	2094.7	16.95	0.20893	2083.4	17.8	0.236048	2141.2	17.4	0.405509
2024-05-02 03:00:00	2093.9	16.94	0.209894	2083	17.72	0.234423	2140.5	17.3	0.405509
2024-05-02 03:30:00	2093.4	16.95	0.209894	2082.6	17.63	0.232274	2139.7	17.24	0.405509
2024-05-02 04:00:00	2092.8	16.96	0.20893	2082.4	17.6	0.231739	2139.1	17.2	0.405509
2024-05-02 04:30:00	2092.2	16.96	0.20893	2082	17.5	0.231739	2138.3	17.12	0.404576
2024-05-02 05:00:00	2091.4	16.94	0.20797	2081.4	17.5	0.230144	2137.9	17.1	0.405509
2024-05-02 05:30:00	2090.9	16.96	0.207014	2081.1	17.44	0.22856	2137.2	17.1	0.405509
2024-05-02 06:00:00	2090.4	16.98	0.205116	2080.6	17.4	0.225944	2136.5	17.08	0.405509
2024-05-02 06:30:00	2089.9	17	0.204174	2080.2	17.4	0.226464	2135.6	17.03	0.406443
2024-05-02 07:00:00	2089.2	17.2	0.203704	2079.4	17.62	0.225424	2135	17.36	0.402717
2024-05-02 07:30:00	2088.3	17.46	0.203704	2078.6	17.97	0.223357	2134	17.79	0.401791
2024-05-02 08:00:00	2087.4	17.76	0.203704	2078	18.34	0.223357	2132.3	18.21	0.401791
2024-05-02 08:30:00	2086.4	18.08	0.203236	2077.4	18.72	0.223872	2130.9	18.57	0.401791
2024-05-02 09:00:00	2085.2	18.42	0.202768	2076.3	19.09	0.223357	2129.5	18.97	0.401791
2024-05-02 09:30:00	2084.1	18.98	0.200447	2075.9	19.58	0.221309	2128.1	19.51	0.400867
2024-05-02 10:00:00	2082.7	19.47	0.201837	2075.1	20.09	0.22182	2126.2	20.02	0.400867
2024-05-02 10:30:00	2081.2	20.28	0.200909	2074	20.77	0.220293	2124.5	20.73	0.399945
2024-05-02 11:00:00	2079.2	20.63	0.201837	2072.9	21.25	0.219786	2122.4	21.04	0.401791
2024-05-02 11:30:00	2090.4	20.96	0.221309	2075.4	21.66	0.223357	2225.7	21.43	0.583445
2024-05-02 12:00:00	2109.8	21.54	0.263027	2079.7	22.17	0.231739	2258.2	22.06	0.606736
2024-05-02 12:30:00	2126.2	21.93	0.279898	2083.8	22.49	0.239332	2256.6	22.46	0.571479
2024-05-02 13:00:00	2135.1	22.34	0.28119	2086.6	22.87	0.244343	2253.1	22.92	0.545758
2024-05-02 13:30:00	2138.7	22.5	0.28119	2088.7	23.07	0.249459	2249.2	23.2	0.526017
2024-05-02 14:00:00	2139.8	22.52	0.281838	2089.8	23.2	0.252348	2245.2	23.37	0.509331
2024-05-02 14:30:00	2139.6	22.65	0.278612	2090	23.27	0.254097	2241.4	23.46	0.497737
2024-05-02 15:00:00	2138.5	22.54	0.275423	2089.9	23.3	0.255859	2237.7	23.45	0.488652
2024-05-02 15:30:00	2137.3	22.33	0.273527	2089.4	23.24	0.25527	2234.3	23.35	0.480839
2024-05-02 16:00:00	2136.3	22.21	0.271019	2088.7	23.2	0.254683	2231.4	23.3	0.473151
2024-05-02 16:30:00	2134.7	22.13	0.267301	2088	23.2	0.253513	2228.4	23.29	0.468813
2024-05-02 17:00:00	2133.1	21.95	0.264241	2086.9	23.16	0.25293	2225.2	23.19	0.463447
2024-05-02 17:30:00	2131.4	21.89	0.261818	2085.9	23.1	0.252348	2222.2	23.1	0.460257
2024-05-02 18:00:00	2130.3	21.53	0.259418	2084.9	22.94	0.251768	2219.1	22.82	0.458142
2024-05-02 18:30:00	2129.1	20.97	0.256448	2083.8	22.54	0.250035	2216.4	22.35	0.453942
2024-05-02 19:00:00	2127.8	20.44	0.254097	2083.1	22.12	0.248886	2214.2	21.88	0.451856
2024-05-02 19:30:00	2126.3	20.03	0.251189	2082.3	21.74	0.247172	2212.2	21.47	0.448745
2024-05-02 20:00:00	2125.4	19.77	0.249459	2081.5	21.45	0.244343	2210.6	21.22	0.445656
2024-05-02 20:30:00	2124.3	19.58	0.247172	2081.1	21.22	0.24322	2209	21.02	0.443609
2024-05-02 21:00:00	2123.3	19.34	0.245471	2080.5	20.9	0.241546	2207.6	20.65	0.44157
2024-05-02 21:30:00	2122.3	19.02	0.242661	2080.1	20.47	0.240991	2206.6	20.21	0.442588
2024-05-02 22:00:00	2121.8	18.68	0.242103	2079.9	20.04	0.238781	2206.2	19.83	0.440555
2024-05-02 22:30:00	2121.2	18.32	0.239883	2079.8	19.62	0.237137	2206	19.49	0.439542
2024-05-02 23:00:00	2120.8	17.94	0.237684	2079	19.26	0.235505	2205.6	19.17	0.437522
2024-05-02 23:30:00	2120.3	17.71	0.238232	2079.1	18.92	0.234963	2205.5	18.84	0.437522
2024-05-03	2119.8	17.55	0.237137	2078.9	18.67	0.232809	2205.3	18.58	0.435512
2024-05-03 00:30:00	2119.2	17.32	0.234423	2078.7	18.4	0.233346	2205.1	18.31	0.436516
2024-05-03 01:00:00	2118.6	17.26	0.234423	2078.2	18.2	0.231206	2204.7	18.11	0.436516
2024-05-03 01:30:00	2117.8	17.13	0.233884	2077.7	18.04	0.229615	2204.5	17.9	0.43451
2024-05-03 02:00:00	2117.3	17.05	0.233346	2078	17.87	0.230144	2204.2	17.73	0.435512
2024-05-03 02:30:00	2116.7	17	0.232274	2077.5	17.75	0.229087	2203.6	17.57	0.435512
2024-05-03 03:00:00	2116	16.96	0.230144	2077.3	17.62	0.228034	2202.9	17.43	0.43451
2024-05-03 03:30:00	2115.2	16.96	0.230144	2077.1	17.55	0.225944	2202.4	17.36	0.43451
2024-05-03 04:00:00	2114.4	16.95	0.231206	2076.8	17.45	0.226464	2201.8	17.24	0.433511
2024-05-03 04:30:00	2113.9	16.9	0.229615	2076.6	17.38	0.226464	2201.3	17.15	0.433511
2024-05-03 05:00:00	2113.1	16.86	0.22751	2076.2	17.3	0.225424	2200.4	17.1	0.433511
2024-05-03 05:30:00	2112.6	16.82	0.229087	2075.6	17.21	0.224905	2200	17	0.433511
2024-05-03 06:00:00	2112	16.84	0.228034	2075.2	17.2	0.223872	2199.1	17	0.431519
2024-05-03 06:30:00	2111.2	16.8	0.226986	2074.9	17.2	0.221309	2198.2	17	0.431519
2024-05-03 07:00:00	2110.3	16.93	0.225944	2074.4	17.37	0.220293	2197	17.23	0.429536
2024-05-03 07:30:00	2109.2	17.2	0.225424	2073.5	17.71	0.221309	2195.4	17.68	0.427563
2024-05-03 08:00:00	2107.9	17.7	0.223357	2073	18.19	0.22182	2193.1	18.21	0.42658
2024-05-03 08:30:00	2106.3	18.21	0.222844	2072.3	18.74	0.220293	2190.9	18.74	0.425598
2024-05-03 09:00:00	2104.5	18.88	0.22182	2072.2	19.66	0.220293	2187.3	19.66	0.42462
2024-05-03 09:30:00	2102.5	19.63	0.220293	2071.3	20.43	0.221309	2183.9	20.43	0.423643
2024-05-03 10:00:00	2100.2	20.37	0.221309	2070	20.99	0.219786	2180.9	21.06	0.423643
2024-05-03 10:30:00	2098.1	21.09	0.218776	2068.5	21.58	0.220293	2177.5	21.7	0.422669
2024-05-03 11:00:00	2095.9	21.6	0.217771	2067.5	22.1	0.21928	2174.4	22.23	0.423643
2024-05-03 11:30:00	2094.5	22.09	0.218776	2066.4	22.67	0.217771	2171.2	22.79	0.420727
2024-05-03 12:00:00	2092.8	22.2	0.21677	2065.6	22.91	0.215774	2168.7	22.9	0.418794
2024-05-03 12:30:00	2091.4	22.2	0.212324	2069	23	0.21727	2166.5	23	0.416869
2024-05-03 13:00:00	2110.7	22.24	0.237137	2096.7	22.93	0.272898	2188.2	23.08	0.456037
2024-05-03 13:30:00	2138.1	22.3	0.276694	2126.6	23	0.31842	2205.7	23.29	0.479733
2024-05-03 14:00:00	2154.5	22.25	0.291072	2136.8	23	0.337287	2209.3	23.3	0.477529
2024-05-03 14:30:00	2160.6	22.25	0.293765	2140.6	23.1	0.341979	2209.9	23.39	0.473151
2024-05-03 15:00:00	2163.9	22.3	0.294442	2141.2	23.15	0.34435	2209.4	23.44	0.467735
2024-05-03 15:30:00	2164.2	22.21	0.292415	2140.5	23.18	0.341979	2208.5	23.39	0.463447
2024-05-03 16:00:00	2164.7	21.97	0.291072	2139	23.05	0.340408	2207.5	23.23	0.458142
2024-05-03 16:30:00	2163.9	21.76	0.288403	2137.7	22.94	0.338844	2206.4	23.05	0.456037
2024-05-03 17:00:00	2163	21.65	0.28774	2136.2	22.85	0.334195	2205.3	22.96	0.453942
2024-05-03 17:30:00	2162.5	21.59	0.284446	2134.8	22.8	0.33266	2204.3	22.87	0.450817
2024-05-03 18:00:00	2161.7	21.47	0.282488	2133.3	22.72	0.331131	2203.2	22.77	0.448745
2024-05-03 18:30:00	2160.6	21.17	0.280543	2132	22.54	0.328095	2202	22.5	0.447713
2024-05-03 19:00:00	2160.5	20.75	0.279254	2130.7	22.24	0.32434	2201.2	22.18	0.445656
2024-05-03 19:30:00	2159.9	20.47	0.276694	2129.3	22	0.322849	2200.4	21.94	0.443609
2024-05-03 20:00:00	2158.7	20.24	0.274789	2128.2	21.8	0.319154	2199.3	21.74	0.443609
2024-05-03 20:30:00	2157.9	20.11	0.273527	2127	21.64	0.317687	2198.7	21.59	0.442588
2024-05-03 21:00:00	2157.1	19.77	0.271644	2125.9	21.3	0.314051	2197.8	21.15	0.44157
2024-05-03 21:30:00	2156.6	19.32	0.269774	2125	20.8	0.311889	2197.4	20.62	0.44157
2024-05-03 22:00:00	2155.9	18.89	0.267917	2124.3	20.3	0.310456	2197.2	20.13	0.440555
2024-05-03 22:30:00	2156.2	18.47	0.267301	2123.8	19.82	0.30761	2197.5	19.67	0.438531
2024-05-03 23:00:00	2155.7	18.1	0.264241	2123.1	19.42	0.305492	2197.7	19.29	0.437522
2024-05-03 23:30:00	2155.2	17.83	0.26485	2122.6	19.06	0.302691	2198.2	18.93	0.436516
2024-05-04	2154.7	17.75	0.263633	2122.2	18.79	0.301301	2198.1	18.66	0.43451
2024-05-04 00:30:00	2154.1	17.6	0.264241	2121.9	18.54	0.299226	2197.9	18.4	0.435512
2024-05-04 01:00:00	2153.5	17.53	0.263027	2121.5	18.35	0.298538	2197.9	18.22	0.435512
2024-05-04 01:30:00	2152.9	17.44	0.261818	2120.8	18.17	0.295121	2197.8	18.05	0.43451
2024-05-04 02:00:00	2152.2	17.38	0.260615	2120	18.02	0.296483	2197.5	17.88	0.432514
2024-05-04 02:30:00	2151.7	17.34	0.259418	2119.5	17.88	0.294442	2197.3	17.75	0.43451
2024-05-04 03:00:00	2151	17.34	0.260016	2118.8	17.8	0.293089	2196.8	17.67	0.43451
2024-05-04 03:30:00	2150.4	17.3	0.260016	2118.3	17.71	0.292415	2196.5	17.6	0.433511
2024-05-04 04:00:00	2149.6	17.3	0.258226	2117.6	17.67	0.291072	2196.1	17.51	0.433511
2024-05-04 04:30:00	2148.8	17.25	0.257632	2116.9	17.6	0.289734	2195.5	17.43	0.433511
2024-05-04 05:00:00	2148.2	17.25	0.256448	2116.5	17.52	0.28774	2195.1	17.37	0.432514
2024-05-04 05:30:00	2147.5	17.2	0.253513	2116.1	17.46	0.28774	2194.5	17.3	0.431519
2024-05-04 06:00:00	2146.7	17.18	0.253513	2115.5	17.4	0.286418	2193.9	17.2	0.433511
2024-05-04 06:30:00	2145.9	17.17	0.254097	2114.6	17.4	0.285102	2193.2	17.2	0.433511
2024-05-04 07:00:00	2145	17.31	0.253513	2113.8	17.51	0.283792	2192.5	17.44	0.430527
2024-05-04 07:30:00	2143.9	17.4	0.251768	2112.7	17.76	0.283139	2191.1	17.74	0.428549
2024-05-04 08:00:00	2142.9	17.48	0.251189	2111.9	17.97	0.281838	2189.6	17.96	0.429536
2024-05-04 08:30:00	2142	17.58	0.250035	2110.8	18.15	0.280543	2188	18.15	0.427563
2024-05-04 09:00:00	2140.7	17.75	0.249459	2109.6	18.37	0.279898	2186.5	18.39	0.427563
2024-05-04 09:30:00	2139.2	18.04	0.248313	2108	18.66	0.277971	2184.9	18.72	0.42658
2024-05-04 10:00:00	2137.6	18.47	0.246037	2106.6	19.04	0.277332	2183.1	19.13	0.42658
2024-05-04 10:30:00	2135.9	18.94	0.246604	2105.3	19.47	0.274789	2181	19.57	0.42462
2024-05-04 11:00:00	2134.3	19.36	0.246604	2103.6	19.91	0.274157	2179	19.97	0.425598
2024-05-04 11:30:00	2132.3	19.73	0.245471	2102	20.32	0.271644	2177.3	20.35	0.425598
2024-05-04 12:00:00	2130.5	20.07	0.243781	2100.4	20.69	0.270396	2175.4	20.7	0.42658
2024-05-04 12:30:00	2128.7	20.36	0.24322	2098.4	21.03	0.271644	2173.6	21.05	0.425598
2024-05-04 13:00:00	2127.3	20.72	0.242661	2096.8	21.39	0.267917	2171.7	21.45	0.42462
2024-05-04 13:30:00	2125	21.12	0.242103	2095	21.77	0.266686	2169.5	21.89	0.423643
2024-05-04 14:00:00	2123.6	21.35	0.240436	2093.4	22.06	0.264241	2167.2	22.17	0.42462
2024-05-04 14:30:00	2122	21.48	0.239332	2091.7	22.23	0.263027	2165	22.32	0.42462
2024-05-04 15:00:00	2120.2	21.55	0.238232	2090.3	22.36	0.261818	2163.1	22.47	0.423643
2024-05-04 15:30:00	2118.3	21.6	0.237137	2088.7	22.48	0.258821	2160.8	22.59	0.423643
2024-05-04 16:00:00	2117.2	21.63	0.234963	2087	22.55	0.257632	2159	22.67	0.422669
2024-05-04 16:30:00	2115.9	21.77	0.233884	2085.5	22.69	0.254683	2157.1	22.85	0.420727
2024-05-04 17:00:00	2114.2	21.76	0.233884	2084.2	22.8	0.253513	2155.3	22.86	0.420727
2024-05-04 17:30:00	2113.1	21.54	0.233346	2082.7	22.68	0.252348	2153.6	22.72	0.420727
2024-05-04 18:00:00	2112.1	21.32	0.230675	2081.6	22.58	0.250035	2152.3	22.57	0.420727
2024-05-04 18:30:00	2111.1	20.97	0.230675	2080.6	22.37	0.248313	2151.1	22.33	0.419759
2024-05-04 19:00:00	2110.6	20.57	0.226986	2079.4	22.11	0.246604	2150	22.04	0.419759
2024-05-04 19:30:00	2110.1	20.27	0.22856	2078.9	21.89	0.244906	2149	21.8	0.418794
2024-05-04 20:00:00	2109.3	20	0.224905	2078.2	21.67	0.24322	2148.1	21.55	0.41783
2024-05-04 20:30:00	2109	19.67	0.225944	2077.8	21.42	0.240991	2147.3	21.25	0.416869
2024-05-04 21:00:00	2108.7	19.15	0.225424	2077.6	20.96	0.240436	2146.4	20.64	0.415911
2024-05-04 21:30:00	2108.7	18.54	0.223872	2077.4	20.36	0.237137	2145.9	19.99	0.414954
2024-05-04 22:00:00	2108.3	18.19	0.223872	2077.2	19.83	0.236048	2145.7	19.48	0.414954
2024-05-04 22:30:00	2108	17.92	0.22182	2076.7	19.4	0.233346	2145.5	19.06	0.414
2024-05-04 23:00:00	2107.8	17.73	0.223872	2076.4	19.04	0.233346	2145.2	18.71	0.414
2024-05-04 23:30:00	2107.3	17.53	0.222844	2076.3	18.74	0.229615	2145	18.41	0.412098
2024-05-05	2106.9	17.43	0.223357	2076.2	18.48	0.230144	2144.7	18.17	0.412098
2024-05-05 00:30:00	2106.2	17.4	0.22182	2075.9	18.29	0.228034	2144.4	17.99	0.41115
2024-05-05 01:00:00	2105.7	17.35	0.220293	2075.2	18.13	0.228034	2144.1	17.85	0.41115
2024-05-05 01:30:00	2105.3	17.28	0.2208	2074.8	17.97	0.226464	2143.3	17.71	0.409261
2024-05-05 02:00:00	2104.6	17.23	0.2208	2074.4	17.86	0.224388	2143.4	17.6	0.409261
2024-05-05 02:30:00	2104.1	17.2	0.2208	2074.4	17.75	0.222844	2142.3	17.47	0.409261
2024-05-05 03:00:00	2103.6	17.16	0.219786	2073.6	17.66	0.223357	2142.3	17.39	0.408319
2024-05-05 03:30:00	2103.1	17.09	0.219786	2073.2	17.6	0.222331	2141.8	17.3	0.40738
2024-05-05 04:00:00	2102.4	17.1	0.21928	2072.7	17.55	0.221309	2141.4	17.27	0.40738
2024-05-05 04:30:00	2101.7	17.07	0.218776	2072.7	17.5	0.219786	2141	17.2	0.408319
2024-05-05 05:00:00	2101.2	17.08	0.218273	2072.1	17.41	0.220293	2140.2	17.2	0.40738
2024-05-05 05:30:00	2100.5	17	0.216272	2071.8	17.4	0.219786	2139.4	17.1	0.40738
2024-05-05 06:00:00	2100	16.95	0.215774	2071.4	17.34	0.217771	2139	17.04	0.40738
2024-05-05 06:30:00	2099.4	16.94	0.215774	2070.9	17.3	0.218273	2138.3	17.02	0.406443
2024-05-05 07:00:00	2098.5	17.16	0.214783	2070.1	17.48	0.216272	2137.8	17.31	0.404576
2024-05-05 07:30:00	2097.4	17.32	0.213796	2069.4	17.78	0.214783	2136.7	17.66	0.403645
2024-05-05 08:00:00	2096.4	17.4	0.214289	2068.9	18.02	0.214783	2135.3	17.88	0.400867
2024-05-05 08:30:00	2095.4	17.4	0.213796	2068.4	18.18	0.214289	2134.1	18.04	0.401791
2024-05-05 09:00:00	2094.4	17.49	0.212814	2067.9	18.36	0.214289	2133	18.23	0.400867
2024-05-05 09:30:00	2093.3	17.84	0.211836	2066.6	18.64	0.212814	2131.8	18.56	0.399945
2024-05-05 10:00:00	2091.7	18.46	0.212324	2065.6	19.09	0.210863	2130.4	19.07	0.399025
2024-05-05 10:30:00	2090.1	18.96	0.211349	2064.8	19.55	0.210863	2128.3	19.53	0.398107
2024-05-05 11:00:00	2088.2	19.3	0.209894	2065.5	19.99	0.210863	2129.2	19.94	0.399025
2024-05-05 11:30:00	2103.8	20.49	0.22182	2071.3	20.54	0.215774	2272.1	21.79	0.648634
2024-05-05 12:00:00	2125.7	20.98	0.259418	2074.8	20.92	0.226986	2281.2	22.06	0.616595
2024-05-05 12:30:00	2141.8	20.9	0.279898	2078.3	21.15	0.236048	2278.3	21.91	0.578096
2024-05-05 13:00:00	2149.8	21.06	0.285759	2081.8	21.45	0.242661	2275.8	22.06	0.549541
2024-05-05 13:30:00	2152.9	21.25	0.289734	2084.7	21.72	0.247172	2273.3	22.2	0.529663
2024-05-05 14:00:00	2155.1	21.38	0.289734	2086.7	21.95	0.250035	2270.1	22.34	0.514044
2024-05-05 14:30:00	2154.2	21.5	0.288403	2088	22.15	0.251768	2267.5	22.49	0.501187
2024-05-05 15:00:00	2154.4	21.49	0.285759	2088.6	22.2	0.253513	2265.7	22.5	0.49204
2024-05-05 15:30:00	2153.7	21.4	0.283139	2088.7	22.21	0.254097	2263.9	22.44	0.484172
2024-05-05 16:00:00	2152.5	21.63	0.279898	2088.5	22.41	0.254097	2262	22.68	0.475335
2024-05-05 16:30:00	2150.7	21.8	0.279898	2088	22.61	0.253513	2258.9	22.8	0.473151
2024-05-05 17:00:00	2149.5	21.84	0.279254	2087.1	22.74	0.252348	2256.9	22.85	0.466659
2024-05-05 17:30:00	2147.5	21.9	0.276058	2086.1	22.89	0.252348	2254.6	22.99	0.463447
2024-05-05 18:00:00	2146	21.66	0.274157	2085	22.85	0.251768	2252	22.78	0.462381
2024-05-05 18:30:00	2144.9	21.04	0.271644	2084.1	22.49	0.248313	2250.2	22.33	0.459198
2024-05-05 19:00:00	2144.6	20.57	0.269774	2083.3	22.18	0.248313	2249.4	22.02	0.457088
2024-05-05 19:30:00	2143.7	20.29	0.267301	2082.6	21.95	0.246604	2248.7	21.84	0.454988
2024-05-05 20:00:00	2142.5	20.04	0.265461	2081.8	21.74	0.245471	2248	21.65	0.453942
2024-05-05 20:30:00	2141.7	19.74	0.264241	2081.3	21.49	0.24322	2247.1	21.38	0.44978
2024-05-05 21:00:00	2141	19.25	0.261818	2080.9	21.02	0.242103	2246.7	20.86	0.451856
2024-05-05 21:30:00	2140.5	18.64	0.260615	2080.6	20.42	0.240991	2246.9	20.24	0.451856
2024-05-05 22:00:00	2140.3	18.15	0.260615	2080.7	19.85	0.237684	2247.5	19.68	0.451856
2024-05-05 22:30:00	2139.9	17.89	0.258821	2080.3	19.43	0.237137	2247.8	19.29	0.450817
2024-05-05 23:00:00	2139.3	17.56	0.258821	2080	19.07	0.235505	2248.3	18.9	0.44978
2024-05-05 23:30:00	2138.9	17.46	0.25704	2079.9	18.79	0.234963	2248.3	18.6	0.448745
2024-05-06	2138.4	17.29	0.25527	2079.8	18.54	0.232274	2248.3	18.34	0.447713
2024-05-06 00:30:00	2137.7	17.2	0.254683	2080	18.31	0.232809	2248.1	18.12	0.446684
2024-05-06 01:00:00	2137	17.14	0.254097	2079.5	18.13	0.231206	2247.8	17.94	0.444631
2024-05-06 01:30:00	2136.2	17.1	0.25293	2079.1	17.97	0.229615	2247.5	17.8	0.443609
2024-05-06 02:00:00	2135.4	17.08	0.251768	2079	17.86	0.229615	2247	17.68	0.445656
2024-05-06 02:30:00	2134.7	17	0.248886	2078.3	17.75	0.229087	2246.6	17.55	0.445656
2024-05-06 03:00:00	2134	16.91	0.248313	2078.1	17.62	0.228034	2246.1	17.42	0.445656
2024-05-06 03:30:00	2133.3	16.9	0.249459	2077.8	17.5	0.225424	2245.5	17.26	0.444631
2024-05-06 04:00:00	2132.3	16.82	0.248313	2078	17.38	0.225944	2244.9	17.14	0.440555
2024-05-06 04:30:00	2131.5	16.82	0.248313	2077.2	17.3	0.225944	2244.2	17.06	0.443609
2024-05-06 05:00:00	2130.9	16.8	0.244906	2076.7	17.28	0.224388	2243.5	17	0.444631
2024-05-06 05:30:00	2130.1	16.84	0.244343	2076.4	17.2	0.224388	2242.8	17	0.443609
2024-05-06 06:00:00	2129.2	16.88	0.242103	2076	17.2	0.222844	2241.9	16.92	0.443609
2024-05-06 06:30:00	2128.4	16.9	0.242103	2075.4	17.2	0.221309	2241.4	16.91	0.44157
2024-05-06 07:00:00	2127.5	16.9	0.242103	2075	17.3	0.2208	2240.4	17.12	0.44157
2024-05-06 07:30:00	2126.5	16.9	0.240991	2074.3	17.53	0.219786	2238.7	17.38	0.438531
2024-05-06 08:00:00	2125.4	16.96	0.239883	2073.4	17.76	0.221309	2236.9	17.58	0.437522
2024-05-06 08:30:00	2124.4	17.07	0.239332	2072.8	17.97	0.2208	2235.1	17.79	0.439542
2024-05-06 09:00:00	2123	17.3	0.238232	2072.1	18.21	0.220293	2233.1	18.03	0.439542
2024-05-06 09:30:00	2121	17.83	0.236592	2071.1	18.58	0.219786	2231.1	18.48	0.437522
2024-05-06 10:00:00	2119	18.66	0.237684	2070.2	19.15	0.218273	2228.2	19.1	0.437522
2024-05-06 10:30:00	2116.8	19.23	0.234963	2069.3	19.66	0.21928	2225.1	19.58	0.438531
2024-05-06 11:00:00	2114.6	19.66	0.234963	2068.2	20.13	0.217771	2221.9	20.01	0.438531
2024-05-06 11:30:00	2112.5	20.15	0.234963	2067.3	20.62	0.217771	2218.9	20.57	0.437522
2024-05-06 12:00:00	2109.9	21.01	0.232809	2065.9	21.26	0.217771	2214.8	21.54	0.435512
2024-05-06 12:30:00	2107.6	21.83	0.233346	2064.5	21.71	0.215278	2209.6	22.4	0.435512
2024-05-06 13:00:00	2105	21.87	0.232274	2063.2	21.95	0.214289	2206	22.39	0.437522
2024-05-06 13:30:00	2103.1	21.9	0.229087	2061.8	22.17	0.213304	2202.9	22.41	0.438531
2024-05-06 14:00:00	2101.3	21.97	0.226986	2060.1	22.45	0.211836	2199.4	22.65	0.436516
2024-05-06 14:30:00	2099.3	21.99	0.226986	2058.8	22.66	0.210863	2195.9	22.69	0.436516
2024-05-06 15:00:00	2097.7	21.84	0.226464	2057.6	22.7	0.209411	2193.3	22.54	0.438531
2024-05-06 15:30:00	2096.2	21.8	0.223357	2056.1	22.7	0.206538	2191.2	22.49	0.439542
2024-05-06 16:00:00	2094.9	21.8	0.2208	2055.2	22.77	0.205589	2189.3	22.47	0.439542
2024-05-06 16:30:00	2093.9	21.79	0.222331	2054.3	22.86	0.204174	2187.1	22.5	0.439542
2024-05-06 17:00:00	2092.5	21.63	0.2208	2053.3	22.82	0.202768	2184.7	22.41	0.438531
2024-05-06 17:30:00	2091.6	21.54	0.21677	2052.3	22.8	0.199986	2182.8	22.33	0.438531
2024-05-06 18:00:00	2090.8	21.28	0.217771	2051.7	22.76	0.199526	2180.8	22.15	0.437522
2024-05-06 18:30:00	2090.3	20.52	0.21677	2051	22.47	0.197242	2178.5	21.73	0.439542
2024-05-06 19:00:00	2090	20	0.215278	2050.1	22.23	0.196789	2177	21.37	0.436516
2024-05-06 19:30:00	2089.5	19.83	0.215278	2049.6	22.16	0.194089	2176.2	21.26	0.435512
2024-05-06 20:00:00	2089.1	19.7	0.213796	2049.1	22.1	0.192309	2175.3	21.16	0.436516
2024-05-06 20:30:00	2088.6	19.52	0.214289	2048.5	21.97	0.191867	2174.4	21.01	0.43451
2024-05-06 21:00:00	2088.1	19.08	0.213304	2047.9	21.62	0.190985	2173.6	20.55	0.43451
2024-05-06 21:30:00	2088	18.51	0.213304	2047.7	21.04	0.189234	2173.4	19.95	0.43451
2024-05-06 22:00:00	2087.9	18.16	0.212324	2047.7	20.51	0.188799	2173.6	19.46	0.433511
2024-05-06 22:30:00	2087.6	17.88	0.210863	2047.6	20.05	0.187932	2173.2	19.06	0.431519
2024-05-06 23:00:00	2087.4	17.71	0.211836	2047.7	19.67	0.186209	2173.1	18.74	0.432514
2024-05-06 23:30:00	2087	17.58	0.211836	2047.4	19.37	0.186209	2172.8	18.45	0.429536
2024-05-07	2086.5	17.49	0.211836	2047.3	19.09	0.184927	2172.6	18.21	0.431519
2024-05-07 00:30:00	2086.1	17.4	0.210863	2047.1	18.86	0.183231	2172.1	18	0.431519
2024-05-07 01:00:00	2085.9	17.32	0.20893	2047.2	18.67	0.184077	2171.5	17.83	0.430527
2024-05-07 01:30:00	2085.2	17.23	0.207014	2047.2	18.47	0.183231	2171.1	17.65	0.430527
2024-05-07 02:00:00	2084.9	17.14	0.20893	2047	18.3	0.18197	2170.5	17.47	0.429536
2024-05-07 02:30:00	2084.7	17.1	0.209411	2047.1	18.14	0.181134	2169.9	17.34	0.430527
2024-05-07 03:00:00	2084	17.1	0.209411	2046.8	18.05	0.181552	2169.5	17.21	0.429536
2024-05-07 03:30:00	2083.3	17.1	0.209411	2046.4	17.94	0.180717	2169.1	17.12	0.428549
2024-05-07 04:00:00	2082.9	17.14	0.209411	2046.3	17.9	0.180717	2168.3	17.1	0.428549
2024-05-07 04:30:00	2082.3	17.2	0.20893	2046.1	17.8	0.181134	2167.9	17.02	0.427563
2024-05-07 05:00:00	2081.8	17.2	0.208449	2045.8	17.8	0.179887	2167.1	17	0.427563
2024-05-07 05:30:00	2081.4	17.19	0.20797	2045.9	17.8	0.179061	2166.6	16.91	0.427563
2024-05-07 06:00:00	2080.9	17.15	0.208449	2045.8	17.71	0.177828	2165.5	16.9	0.425598
2024-05-07 06:30:00	2080.2	17.13	0.207014	2045.5	17.7	0.178238	2165.1	16.9	0.42658
2024-05-07 07:00:00	2079.4	17.3	0.206063	2045.3	17.9	0.177419	2163.6	17.12	0.423643
2024-05-07 07:30:00	2078.3	17.49	0.204174	2045.2	18.25	0.176604	2162	17.5	0.423643
2024-05-07 08:00:00	2077.2	17.84	0.204644	2044.3	18.72	0.177419	2159.8	17.98	0.422669
2024-05-07 08:30:00	2075.7	18.32	0.203704	2043.6	19.4	0.175388	2157.3	18.64	0.418794
2024-05-07 09:00:00	2074	18.86	0.200909	2042.8	20.39	0.174582	2154.7	19.44	0.41783
2024-05-07 09:30:00	2071.7	20.21	0.201372	2042.3	21.51	0.174181	2151.6	20.66	0.414954
2024-05-07 10:00:00	2068.7	21.82	0.200909	2041.2	22.46	0.174582	2147.2	21.78	0.414954
2024-05-07 10:30:00	2066.1	22.25	0.200447	2040.4	23.19	0.17338	2143.5	22.26	0.414954
2024-05-07 11:00:00	2064	22.48	0.199986	2039.4	23.91	0.174181	2139.9	22.86	0.414954
2024-05-07 11:30:00	2062.1	22.58	0.198609	2037.9	24.1	0.17338	2137.5	22.84	0.414
2024-05-07 12:00:00	2235.2	22.87	0.335738	2274	23.33	0.408319	2357.8	22.72	0.814704
2024-05-07 12:30:00	2374.7	22.85	0.439542	2301.3	22.63	0.394457	2363.5	23.21	0.691831
2024-05-07 13:00:00	2382.9	23.03	0.404576	2299.3	22.66	0.347536	2352.2	23.53	0.623735
2024-05-07 13:30:00	2382.5	22.95	0.380189	2295.3	22.8	0.31989	2343.3	23.42	0.587489
2024-05-07 14:00:00	2381.1	22.58	0.363915	2291.6	22.71	0.304089	2337.7	23.13	0.563638
2024-05-07 14:30:00	2377.5	22.31	0.34914	2285.8	22.69	0.292415	2332.3	23.04	0.544503
2024-05-07 15:00:00	2372.5	22.03	0.337287	2278.2	22.56	0.282488	2327.1	22.86	0.532108
2024-05-07 15:30:00	2368.7	21.89	0.328095	2271	22.5	0.275423	2323.3	22.72	0.5236
2024-05-07 16:00:00	2365.1	21.84	0.321366	2265.6	22.5	0.269153	2320.3	22.7	0.514044
2024-05-07 16:30:00	2362.3	21.94	0.316228	2259.9	22.61	0.265461	2318.2	22.75	0.510505
2024-05-07 17:00:00	2358.6	22	0.311172	2253.5	22.7	0.260016	2315.2	22.78	0.505825
2024-05-07 17:30:00	2356	21.97	0.30761	2249.3	22.7	0.258821	2314.1	22.7	0.505825
2024-05-07 18:00:00	2353.6	21.69	0.303389	2244.7	22.59	0.255859	2312	22.55	0.502343
2024-05-07 18:30:00	2351	21.04	0.298538	2239	22.21	0.254097	2310.1	22.14	0.500035
2024-05-07 19:00:00	2348.9	20.4	0.293765	2234.2	21.75	0.251768	2308.6	21.66	0.496592
2024-05-07 19:30:00	2346.8	19.95	0.293089	2230.3	21.35	0.249459	2307.1	21.25	0.494311
2024-05-07 20:00:00	2344.8	19.62	0.290402	2225.6	21.02	0.246604	2305.8	20.92	0.493174
2024-05-07 20:30:00	2343.2	19.46	0.288403	2222.7	20.82	0.245471	2305.2	20.68	0.489779
2024-05-07 21:00:00	2342.1	19.17	0.28774	2220.2	20.47	0.24322	2304.3	20.27	0.49204
2024-05-07 21:30:00	2341	18.72	0.285759	2218.6	19.96	0.240436	2304.3	19.83	0.488652
2024-05-07 22:00:00	2340.7	18.3	0.284446	2216.5	19.51	0.238781	2304.6	19.46	0.488652
2024-05-07 22:30:00	2340.2	17.96	0.284446	2214.5	19.12	0.236048	2304.8	19.09	0.486407
2024-05-07 23:00:00	2339.3	17.79	0.283792	2213	18.82	0.236592	2305.1	18.78	0.485289
2024-05-07 23:30:00	2337.6	17.6	0.281838	2211.5	18.53	0.234423	2305.6	18.5	0.483059
2024-05-08	2336.3	17.54	0.28119	2209.5	18.33	0.233884	2305.7	18.3	0.484172
2024-05-08 00:30:00	2335	17.46	0.281838	2207.8	18.15	0.233346	2305.3	18.11	0.483059
2024-05-08 01:00:00	2333.8	17.3	0.281838	2206.2	17.96	0.230144	2305.4	17.93	0.480839
2024-05-08 01:30:00	2332	17.3	0.28119	2204.5	17.84	0.230675	2305.2	17.78	0.480839
2024-05-08 02:00:00	2330.2	17.27	0.28119	2203	17.72	0.229615	2304.7	17.64	0.479733
2024-05-08 02:30:00	2328.6	17.2	0.280543	2201.4	17.59	0.226986	2304.3	17.48	0.477529
2024-05-08 03:00:00	2327.3	17.19	0.279898	2199.6	17.47	0.226464	2303.7	17.36	0.479733
2024-05-08 03:30:00	2325.2	17.1	0.277332	2197.8	17.37	0.226986	2303.2	17.23	0.47863
2024-05-08 04:00:00	2324.1	17.1	0.276058	2196.2	17.26	0.225424	2302.8	17.11	0.479733
2024-05-08 04:30:00	2322.4	17.1	0.276694	2194.2	17.19	0.224388	2302.2	17.02	0.476431
2024-05-08 05:00:00	2320.1	17.01	0.278612	2192.3	17.1	0.222331	2301.7	16.91	0.477529
2024-05-08 05:30:00	2318.3	16.95	0.278612	2190.3	17.01	0.223872	2301.3	16.81	0.477529
2024-05-08 06:00:00	2317.3	16.97	0.279254	2188.3	16.95	0.22182	2300.4	16.71	0.476431
2024-05-08 06:30:00	2314.8	16.94	0.278612	2186.2	16.9	0.2208	2299.6	16.7	0.476431
2024-05-08 07:00:00	2313	16.9	0.276058	2183.6	16.99	0.21928	2298.5	16.77	0.475335
2024-05-08 07:30:00	2309.7	16.94	0.276058	2180.3	17.21	0.218273	2296.5	17.01	0.472063
2024-05-08 08:00:00	2306.8	17.24	0.274789	2176.5	17.59	0.21677	2294.1	17.42	0.470977
2024-05-08 08:30:00	2302.1	17.75	0.27227	2171.7	18.21	0.215278	2290.8	17.99	0.469894
2024-05-08 09:00:00	2296	18.49	0.273527	2166	19.15	0.213304	2286.4	18.8	0.465586
2024-05-08 09:30:00	2288.7	19.88	0.27227	2159.6	20.22	0.212324	2281.4	19.8	0.464515
2024-05-08 10:00:00	2277.4	21.57	0.27227	2152.5	21.05	0.212814	2275.2	20.83	0.462381
2024-05-08 10:30:00	2267.3	22.91	0.27227	2145.2	22.17	0.212324	2269.1	21.92	0.460257
2024-05-08 11:00:00	2259.5	23.2	0.271019	2138	23.09	0.210378	2262.7	23	0.460257
2024-05-08 11:30:00	2251.2	23.34	0.268534	2131.2	23.79	0.210378	2256.5	23.44	0.460257
2024-05-08 12:00:00	2243.2	23.72	0.267917	2126.1	23.74	0.20797	2251.2	24.23	0.458142
2024-05-08 12:30:00	2286.9	23.61	0.299916	2190.8	23.13	0.239883	2292	24.43	0.514044
2024-05-08 13:00:00	2358.2	23.29	0.340408	2261.1	22.66	0.271644	2325	23.94	0.517607
2024-05-08 13:30:00	2357.5	22.89	0.326588	2261.7	22.55	0.25704	2320.6	23.52	0.496592
2024-05-08 14:00:00	2353.6	22.41	0.316228	2255.5	22.43	0.245471	2316.7	23.22	0.485289
2024-05-08 14:30:00	2348.4	22.02	0.30903	2248.7	22.26	0.239883	2312.2	22.98	0.47863
2024-05-08 15:00:00	2343.4	21.81	0.303389	2240.1	22.13	0.236048	2308.3	22.72	0.474242
2024-05-08 15:30:00	2338.7	21.72	0.297852	2232.9	22.02	0.231739	2305.6	22.53	0.475335
2024-05-08 16:00:00	2334.3	21.7	0.294442	2225.3	22.01	0.229087	2302.2	22.43	0.473151
2024-05-08 16:30:00	2330.2	21.7	0.293765	2218.7	22.15	0.226464	2298.7	22.4	0.469894
2024-05-08 17:00:00	2325.6	21.83	0.289734	2211.5	22.2	0.225944	2295	22.4	0.469894
2024-05-08 17:30:00	2321.2	21.83	0.286418	2204	22.2	0.224388	2291.3	22.26	0.470977
2024-05-08 18:00:00	2316.8	21.73	0.28774	2197.2	22.2	0.222844	2288.6	22.11	0.473151
2024-05-08 18:30:00	2313.1	21.71	0.287078	2190.2	22.27	0.2208	2285.3	22.13	0.472063
2024-05-08 19:00:00	2308.7	21.77	0.285759	2183.3	22.4	0.218273	2281.8	22.2	0.472063
2024-05-08 19:30:00	2304.9	21.63	0.282488	2177.2	22.39	0.21928	2278.6	22.1	0.473151
2024-05-08 20:00:00	2302.2	21.29	0.283139	2172.1	22.22	0.218776	2276	21.85	0.475335
2024-05-08 20:30:00	2300.4	20.78	0.281838	2167.7	21.9	0.216272	2274.1	21.47	0.475335
2024-05-08 21:00:00	2299	20.31	0.281838	2164.7	21.44	0.214783	2272.9	21.01	0.474242
2024-05-08 21:30:00	2298.5	19.98	0.279898	2162.4	21.02	0.213796	2272.5	20.66	0.475335
2024-05-08 22:00:00	2298.3	19.66	0.279898	2160.5	20.59	0.211349	2272.2	20.34	0.473151
2024-05-08 22:30:00	2297.8	19.36	0.280543	2158.6	20.17	0.209411	2272	20.03	0.473151
2024-05-08 23:00:00	2297.3	19.08	0.277971	2156.9	19.79	0.20797	2272	19.74	0.473151
2024-05-08 23:30:00	2296.7	18.81	0.279898	2155.3	19.45	0.206538	2271.8	19.47	0.472063
2024-05-09	2296.4	18.52	0.278612	2153.7	19.13	0.205589	2271.9	19.22	0.473151
2024-05-09 00:30:00	2296	18.27	0.277332	2152.5	18.82	0.205116	2271.9	18.97	0.470977
2024-05-09 01:00:00	2295.6	18	0.277971	2150.9	18.51	0.203236	2272	18.71	0.472063
2024-05-09 01:30:00	2295.7	17.75	0.277971	2149.3	18.24	0.202768	2272	18.46	0.470977
2024-05-09 02:00:00	2294.6	17.73	0.278612	2147.8	18.09	0.201837	2271.9	18.31	0.468813
2024-05-09 02:30:00	2293.3	17.54	0.277332	2146.5	17.91	0.200447	2271.8	18.13	0.470977
2024-05-09 03:00:00	2292.5	17.49	0.276058	2145.3	17.78	0.199986	2271.6	17.97	0.470977
2024-05-09 03:30:00	2292	17.4	0.274789	2143.9	17.64	0.199067	2271.4	17.83	0.470977
2024-05-09 04:00:00	2289.8	17.33	0.275423	2142.5	17.54	0.196789	2271	17.69	0.468813
2024-05-09 04:30:00	2288.3	17.3	0.276058	2141.1	17.47	0.196789	2270.6	17.6	0.468813
2024-05-09 05:00:00	2287.9	17.21	0.277332	2139.5	17.4	0.196336	2270.1	17.47	0.469894
2024-05-09 05:30:00	2285.8	17.18	0.277971	2138.1	17.35	0.195884	2269.6	17.38	0.469894
2024-05-09 06:00:00	2284.7	17.16	0.277971	2136.5	17.3	0.194536	2269	17.28	0.469894
2024-05-09 06:30:00	2282.8	17.12	0.277971	2134.8	17.24	0.192752	2268.5	17.2	0.468813
2024-05-09 07:00:00	2280.4	17.25	0.276694	2132.6	17.39	0.191426	2267.2	17.33	0.468813
2024-05-09 07:30:00	2276.3	17.52	0.274789	2128.7	17.71	0.190108	2265.1	17.64	0.467735
2024-05-09 08:00:00	2272.3	17.8	0.276058	2124.7	18.08	0.188365	2262.2	17.96	0.466659
2024-05-09 08:30:00	2267.4	17.92	0.275423	2119.8	18.33	0.187499	2258	18.25	0.466659
2024-05-09 09:00:00	2260.2	18.36	0.274789	2114.4	18.87	0.184927	2253.6	18.83	0.464515
2024-05-09 09:30:00	2250.9	19.59	0.273527	2108.8	19.71	0.180717	2248.7	19.64	0.463447
2024-05-09 10:00:00	2239.5	20.93	0.272898	2102.7	20.47	0.178649	2242.4	20.48	0.460257
2024-05-09 10:30:00	2228.8	21.97	0.27227	2096.3	21.62	0.178238	2236.3	21.72	0.457088
2024-05-09 11:00:00	2251.5	22.19	0.296483	2199.8	22.34	0.264241	2298.3	22.73	0.554626
2024-05-09 11:30:00	2333.2	22.23	0.358922	2334	22.18	0.377572	2351.7	22.61	0.582103
2024-05-09 12:00:00	2331.1	22.87	0.350752	2326.7	22.43	0.353997	2342.2	23.36	0.54325
2024-05-09 12:30:00	2323.3	23.43	0.343558	2317.1	22.52	0.338065	2333.5	23.84	0.526017
2024-05-09 13:00:00	2315	23.84	0.338065	2306.9	22.69	0.325087	2326.2	24.02	0.516416
2024-05-09 13:30:00	2307.1	24.18	0.334195	2295.6	23.09	0.314775	2319.5	24.19	0.512861
2024-05-09 14:00:00	2299.8	24.46	0.331894	2283.4	23.5	0.306196	2312.4	24.46	0.510505
2024-05-09 14:30:00	2291.8	24.75	0.33037	2271.4	23.87	0.297852	2306.5	24.8	0.506991
2024-05-09 15:00:00	2284.2	25.09	0.328852	2258.3	24.24	0.290402	2301.3	25.07	0.505825
2024-05-09 15:30:00	2276.8	25.43	0.327341	2245.8	24.56	0.285102	2296.1	25.24	0.508159
2024-05-09 16:00:00	2270.1	25.71	0.325837	2234.1	24.91	0.278612	2291.5	25.47	0.508159
2024-05-09 16:30:00	2264.3	25.93	0.32434	2222.4	25.35	0.272898	2286.2	25.66	0.506991
2024-05-09 17:00:00	2258.4	26.15	0.322849	2212	25.56	0.268534	2281.2	25.87	0.508159
2024-05-09 17:30:00	2252.5	26.3	0.321366	2202.6	25.72	0.263633	2277.3	25.9	0.509331
2024-05-09 18:00:00	2247	26.19	0.31989	2193.3	25.8	0.258226	2273.4	25.9	0.510505
2024-05-09 18:30:00	2240.9	26.23	0.319154	2184.4	25.94	0.25527	2269.4	25.99	0.510505
2024-05-09 19:00:00	2234.7	26.3	0.316957	2175.3	26.11	0.248886	2265.5	26.1	0.511682
2024-05-09 19:30:00	2229.6	26.19	0.314051	2168.1	26.15	0.246604	2261.6	26.08	0.511682
2024-05-09 20:00:00	2225.4	25.87	0.311889	2161.7	26.01	0.24322	2258	25.88	0.511682
2024-05-09 20:30:00	2221.6	25.36	0.309742	2156.6	25.71	0.240436	2255.8	25.55	0.511682
2024-05-09 21:00:00	2219.5	24.63	0.306902	2152.9	25.16	0.236592	2253.9	24.97	0.511682
2024-05-09 21:30:00	2217.3	23.78	0.306196	2150.2	24.44	0.234423	2251.6	24.25	0.512861
2024-05-09 22:00:00	2216.1	22.99	0.304089	2147.8	23.69	0.231206	2250.6	23.53	0.510505
2024-05-09 22:30:00	2215.2	22.29	0.301995	2145.6	22.99	0.228034	2249.8	22.87	0.510505
2024-05-09 23:00:00	2214.2	21.68	0.299226	2144	22.34	0.225424	2248.5	22.27	0.509331
2024-05-09 23:30:00	2213.3	21.12	0.297852	2142.5	21.76	0.222844	2247.6	21.76	0.506991
2024-05-10	2212.3	20.8	0.294442	2141.2	21.32	0.221309	2247.3	21.4	0.505825
2024-05-10 00:30:00	2211.5	20.59	0.295801	2139.9	20.99	0.218776	2247	21.12	0.502343
2024-05-10 01:00:00	2211	20.34	0.295121	2138.5	20.68	0.21727	2246.7	20.88	0.503501
2024-05-10 01:30:00	2210.6	20.06	0.293089	2137.3	20.35	0.215278	2246.5	20.61	0.500035
2024-05-10 02:00:00	2210	19.73	0.295121	2136.1	20.03	0.213796	2246.3	20.33	0.501187
2024-05-10 02:30:00	2209.8	19.41	0.293089	2134.8	19.69	0.211349	2246.2	20.06	0.500035
2024-05-10 03:00:00	2209.6	19.06	0.293089	2133.5	19.39	0.209894	2245.9	19.76	0.500035
2024-05-10 03:30:00	2209.6	18.69	0.293765	2132.7	19.11	0.208449	2245.8	19.49	0.500035
2024-05-10 04:00:00	2209.1	18.36	0.292415	2131.8	18.83	0.207014	2245.7	19.21	0.498884
2024-05-10 04:30:00	2208.9	18.03	0.292415	2131.1	18.52	0.206538	2245.6	18.9	0.498884
2024-05-10 05:00:00	2208.3	17.9	0.293765	2129.7	18.33	0.204174	2245.7	18.67	0.497737
2024-05-10 05:30:00	2207.4	17.81	0.293089	2128.4	18.21	0.204174	2245.3	18.5	0.496592
2024-05-10 06:00:00	2206.3	17.71	0.293089	2127.2	18.1	0.203236	2245.1	18.33	0.496592
2024-05-10 06:30:00	2205.2	17.65	0.292415	2125.9	18.04	0.202302	2244.6	18.19	0.496592
2024-05-10 07:00:00	2203.9	17.63	0.291743	2124.2	18.05	0.199986	2244	18.19	0.496592
2024-05-10 07:30:00	2200.4	17.91	0.291743	2121.8	18.29	0.199067	2242.5	18.4	0.494311
2024-05-10 08:00:00	2197.2	18.16	0.291072	2118.4	18.56	0.198153	2240	18.63	0.49204
2024-05-10 08:30:00	2193.9	18.38	0.289068	2113.5	18.83	0.194984	2236.5	18.91	0.489779
2024-05-10 09:00:00	2186.9	19.09	0.289068	2108.5	19.44	0.191867	2232.5	19.58	0.488652
2024-05-10 09:30:00	2178.2	20.75	0.287078	2102.9	20.56	0.188799	2228.6	20.6	0.487528
2024-05-10 10:00:00	2170.5	21.95	0.286418	2096.6	21.39	0.185353	2223.7	21.39	0.486407
2024-05-10 10:30:00	2163	22.91	0.284446	2098.2	22.56	0.188365	2218.3	22.46	0.484172
2024-05-10 11:00:00	2349.2	22.48	0.524807	2342	22.42	0.396278	2451.7	22.19	0.905733
2024-05-10 11:30:00	2430.5	22.1	0.564937	2353.3	22.79	0.348337	2437.4	22.22	0.77983
2024-05-10 12:00:00	2414.4	22.7	0.514044	2349.8	23.19	0.320627	2425.9	22.8	0.734514
2024-05-10 12:30:00	2401.8	23.2	0.488652	2344.4	23.31	0.301995	2419.6	23.31	0.72277
2024-05-10 13:00:00	2392.8	23.52	0.476431	2337.3	23.45	0.290402	2414	23.73	0.714496
2024-05-10 13:30:00	2385.2	23.78	0.467735	2328.6	23.75	0.28119	2408.9	24.14	0.709578
2024-05-10 14:00:00	2378.4	23.99	0.462381	2318.6	24.08	0.276694	2403.6	24.52	0.704693
2024-05-10 14:30:00	2372.2	24.18	0.458142	2308.5	24.36	0.271644	2399	24.84	0.699842
2024-05-10 15:00:00	2367.2	24.42	0.457088	2298.2	24.62	0.267917	2394.4	25.06	0.704693
2024-05-10 16:00:00	2357.7	24.75	0.451856	2278	24.99	0.266073	2387.1	25.18	0.704693
2024-05-10 16:30:00	2354.2	24.72	0.452898	2268.3	25.26	0.26485	2383.9	25.2	0.703072
2024-05-10 17:00:00	2351.1	24.77	0.44978	2257.9	25.29	0.263633	2380.8	25.2	0.703072
2024-05-10 17:30:00	2348.2	24.68	0.445656	2248.9	25.2	0.261216	2377.9	25.16	0.696627
2024-05-10 18:00:00	2345.8	24.39	0.445656	2241.2	25.13	0.260615	2375.7	24.97	0.698232
2024-05-10 18:30:00	2343.3	24.22	0.44157	2233.7	25.1	0.260016	2373.2	24.92	0.698232
2024-05-10 19:00:00	2340.5	24.3	0.440555	2225.7	25.13	0.257632	2370.8	25	0.696627
2024-05-10 19:30:00	2338.1	24.16	0.439542	2218.6	25.12	0.254097	2368.2	24.95	0.696627
2024-05-10 20:00:00	2336.8	23.99	0.435512	2214.8	25.03	0.254097	2366.5	24.79	0.691831
2024-05-10 20:30:00	2336	23.78	0.436516	2210.1	24.91	0.253513	2365.1	24.62	0.691831
2024-05-10 21:00:00	2336.3	23.35	0.433511	2207.4	24.58	0.251189	2364	24.23	0.691831
2024-05-10 21:30:00	2336.4	22.63	0.43451	2205.2	23.97	0.251189	2363.3	23.63	0.69024
2024-05-10 22:00:00	2337	22.2	0.432514	2203.6	23.41	0.250035	2363.4	23.19	0.687068
2024-05-10 22:30:00	2337.4	21.9	0.431519	2202.1	22.95	0.247172	2363.2	22.85	0.687068
2024-05-10 23:00:00	2337.5	21.62	0.431519	2200.7	22.53	0.247172	2363.2	22.54	0.683912
2024-05-10 23:30:00	2336.9	21.3	0.431519	2199.7	22.14	0.246037	2363	22.22	0.680769
2024-05-11	2337.7	20.96	0.429536	2198.8	21.74	0.244343	2362.6	21.89	0.679204
2024-05-11 00:30:00	2338	20.61	0.429536	2198.1	21.34	0.244343	2363	21.55	0.674528
2024-05-11 01:00:00	2338.3	20.28	0.428549	2197.4	20.96	0.242661	2362.6	21.21	0.674528
2024-05-11 01:30:00	2338.4	19.97	0.427563	2196.4	20.6	0.242103	2362.9	20.87	0.672977
2024-05-11 02:00:00	2338.4	19.65	0.427563	2195.5	20.25	0.239883	2363.6	20.54	0.668344
2024-05-11 02:30:00	2338.7	19.34	0.42658	2194.9	19.9	0.238781	2363.4	20.21	0.669885
2024-05-11 03:00:00	2338.8	19.01	0.42658	2193.7	19.55	0.239332	2363.5	19.87	0.665273
2024-05-11 03:30:00	2339	18.68	0.425598	2193.2	19.24	0.237684	2363.9	19.55	0.666807
2024-05-11 04:00:00	2338.8	18.37	0.425598	2192.7	18.95	0.237684	2363.6	19.28	0.663743
2024-05-11 04:30:00	2338.2	18.3	0.42658	2191.9	18.8	0.237137	2363.6	19.07	0.663743
2024-05-11 05:00:00	2337.9	18.18	0.42462	2190.9	18.65	0.234963	2364	18.9	0.660693
2024-05-11 05:30:00	2337.3	18	0.42462	2189.9	18.46	0.234963	2363.9	18.69	0.657658
2024-05-11 06:00:00	2337	17.96	0.423643	2188.6	18.38	0.234423	2363.7	18.55	0.657658
2024-05-11 06:30:00	2336.2	17.85	0.422669	2187.1	18.24	0.233346	2363.6	18.41	0.660693
2024-05-11 07:00:00	2334.6	18.06	0.422669	2184.7	18.34	0.231206	2362.6	18.47	0.657658
2024-05-11 07:30:00	2332.2	18.37	0.422669	2180.7	18.63	0.229087	2360.9	18.7	0.656145
2024-05-11 08:00:00	2329.6	18.52	0.420727	2175.6	18.9	0.226986	2358.9	18.9	0.653131
2024-05-11 08:30:00	2325.8	18.68	0.419759	2169.5	19.14	0.225944	2355.9	19.16	0.651628
2024-05-11 09:00:00	2320.5	19.19	0.416869	2162.9	19.62	0.223872	2353.2	19.7	0.651628
2024-05-11 09:30:00	2312.9	20.39	0.415911	2154.6	20.34	0.219786	2349.3	20.4	0.65013
2024-05-11 10:00:00	2303.7	21.72	0.412098	2145.3	21.09	0.215278	2345.8	21.08	0.65013
2024-05-11 10:30:00	2295.2	22.7	0.41115	2136.3	22.13	0.213304	2341.2	21.89	0.648634
2024-05-11 11:00:00	2289	22.94	0.410204	2127.5	23.09	0.210378	2336.6	22.73	0.65013
2024-05-11 11:30:00	2282.8	23.25	0.40738	2119.1	23.89	0.207014	2332.5	23.33	0.653131
2024-05-11 12:00:00	2275.8	23.63	0.402717	2110.9	24.2	0.202302	2327.6	23.9	0.656145
2024-05-11 12:30:00	2268.8	24.04	0.400867	2103.4	24.21	0.198153	2323.8	24.33	0.657658
2024-05-11 13:00:00	2262.3	24.32	0.399945	2095.7	24.36	0.194089	2320.8	24.59	0.662217
2024-05-11 13:30:00	2255.6	24.58	0.397192	2088	24.63	0.188799	2317.4	24.85	0.660693
2024-05-11 14:00:00	2249.2	24.83	0.395367	2080.3	24.97	0.184077	2313.9	25.15	0.662217
2024-05-11 14:30:00	2242.4	25.08	0.39355	2073.1	25.28	0.179887	2310.5	25.45	0.663743
2024-05-11 15:00:00	2236.2	25.34	0.391742	2066.8	25.6	0.174985	2307.5	25.68	0.663743
2024-05-11 15:30:00	2230.2	25.49	0.38815	2060.8	25.79	0.170608	2304.8	25.7	0.665273
2024-05-11 16:00:00	2225.5	25.38	0.387258	2055.5	25.97	0.167109	2302.2	25.75	0.665273
2024-05-11 16:30:00	2221.3	25.25	0.383707	2050.2	26.24	0.162181	2300.5	25.7	0.665273
2024-05-11 17:00:00	2217.7	25.15	0.379315	2045.8	26.4	0.158489	2297.6	25.7	0.665273
2024-05-11 17:30:00	2214.1	24.93	0.379315	2042.3	26.4	0.155597	2296.1	25.55	0.665273
2024-05-11 18:00:00	2211.1	24.65	0.376704	2039.1	26.4	0.153462	2293.5	25.34	0.665273
2024-05-11 18:30:00	2207.7	24.46	0.375837	2035.9	26.41	0.150314	2291.8	25.2	0.663743
2024-05-11 19:00:00	2204.5	24.28	0.372392	2033.1	26.5	0.148936	2289.5	25.12	0.660693
2024-05-11 19:30:00	2202.1	24.06	0.369828	2077.8	26.31	0.165577	2301.9	25.02	0.682339
2024-05-11 20:00:00	2318.7	23.25	0.506991	2418.7	23.72	0.203236	2367.5	24.17	0.772681
2024-05-11 20:30:00	2329.9	22.58	0.49545	2434.6	23.59	0.149279	2357.1	23.84	0.72778
2024-05-11 21:00:00	2327.7	22.04	0.476431	2433	23.35	0.135831	2353.8	23.4	0.717794
2024-05-11 21:30:00	2326.3	21.73	0.462381	2430.1	23	0.129718	2352.7	23.04	0.714496
2024-05-11 22:00:00	2325.1	21.51	0.458142	2427.6	22.65	0.126765	2351.6	22.7	0.709578
2024-05-11 22:30:00	2324.5	21.2	0.452898	2425.1	22.26	0.12388	2350.6	22.33	0.704693
2024-05-11 23:00:00	2324.1	20.85	0.450817	2422.4	21.87	0.121339	2350.5	21.97	0.704693
2024-05-11 23:30:00	2324	20.48	0.447713	2420.6	21.44	0.120504	2350.1	21.59	0.701455
2024-05-12	2323.9	20.15	0.445656	2418.2	21.04	0.11885	2350.3	21.22	0.699842
2024-05-12 00:30:00	2324	19.86	0.444631	2416.4	20.67	0.118577	2349.8	20.87	0.696627
2024-05-12 01:00:00	2324	19.57	0.443609	2415.4	20.33	0.117761	2350.1	20.55	0.691831
2024-05-12 01:30:00	2324	19.29	0.44157	2413.8	20	0.11695	2349.1	20.22	0.693426
2024-05-12 02:00:00	2323.9	19	0.440555	2412.2	19.67	0.115611	2349.1	19.89	0.69024
2024-05-12 02:30:00	2324	18.69	0.437522	2410.7	19.36	0.114551	2348.9	19.56	0.69024
2024-05-12 03:00:00	2324.4	18.38	0.439542	2409.5	19.05	0.115878	2349	19.27	0.687068
2024-05-12 03:30:00	2324	18.3	0.438531	2408.5	18.85	0.11508	2348.7	19.05	0.685488
2024-05-12 04:00:00	2323.7	18.13	0.436516	2407.2	18.72	0.11508	2348.5	18.86	0.682339
2024-05-12 04:30:00	2323.5	17.98	0.437522	2405.9	18.53	0.115611	2348.6	18.64	0.683912
2024-05-12 05:00:00	2322.8	17.96	0.435512	2404.3	18.43	0.115611	2348.1	18.5	0.680769
2024-05-12 05:30:00	2322	17.9	0.436516	2402.4	18.32	0.115611	2347.8	18.36	0.677642
2024-05-12 06:00:00	2321.8	17.82	0.43451	2400.7	18.24	0.114815	2347.3	18.24	0.680769
2024-05-12 06:30:00	2320.7	17.8	0.433511	2399	18.16	0.115345	2346.7	18.11	0.679204
2024-05-12 07:00:00	2319.3	17.82	0.432514	2396.5	18.2	0.114815	2346.4	18.13	0.677642
2024-05-12 07:30:00	2317.2	18.06	0.431519	2392.6	18.41	0.115345	2344.9	18.32	0.676083
2024-05-12 08:00:00	2313.8	18.35	0.430527	2386.4	18.7	0.115345	2342.5	18.58	0.674528
2024-05-12 08:30:00	2310.4	18.5	0.428549	2378.9	18.94	0.11508	2339.2	18.85	0.669885
2024-05-12 09:00:00	2304.8	18.92	0.427563	2370.2	19.31	0.11508	2336.1	19.33	0.669885
2024-05-12 09:30:00	2296.7	20.11	0.42462	2358.1	19.85	0.115345	2332.5	19.95	0.668344
2024-05-12 10:00:00	2287.5	21.37	0.422669	2342.6	20.49	0.11695	2327.9	20.54	0.666807
2024-05-12 10:30:00	2283.3	22.17	0.42658	2341.8	21.19	0.119674	2335.4	21.07	0.687068
2024-05-12 11:00:00	2313.1	22.21	0.465586	2384.8	21.79	0.122744	2356.4	21.51	0.706318
2024-05-12 11:30:00	2312.3	22.36	0.460257	2381.1	22.38	0.11695	2351.1	21.93	0.696627
2024-05-12 12:00:00	2306.5	22.53	0.451856	2372.3	22.6	0.115345	2346.4	22.26	0.696627
2024-05-12 12:30:00	2300.4	22.6	0.44978	2362.9	22.6	0.113501	2342.7	22.57	0.695024
2024-05-12 13:00:00	2295.7	22.6	0.443609	2351.1	22.61	0.114815	2338.2	22.85	0.693426
2024-05-12 13:30:00	2289.8	22.76	0.44157	2338.4	22.8	0.115611	2334.7	23.11	0.693426
2024-05-12 14:00:00	2284.2	22.91	0.436516	2324.9	23.09	0.116413	2330.8	23.34	0.693426
2024-05-12 14:30:00	2278.3	23.07	0.43451	2310.2	23.32	0.11695	2327	23.52	0.693426
2024-05-12 15:00:00	2273.4	23.3	0.431519	2294.6	23.54	0.11722	2323.4	23.68	0.695024
2024-05-12 15:30:00	2267.3	23.51	0.429536	2280.3	23.74	0.118032	2320.4	23.84	0.693426
2024-05-12 16:00:00	2262.8	23.65	0.42658	2267.4	23.96	0.118032	2318	23.94	0.695024
2024-05-12 16:30:00	2258.9	23.58	0.42658	2254.6	24.15	0.118032	2315.2	24	0.693426
2024-05-12 17:00:00	2255.7	23.65	0.421697	2242.9	24.23	0.118577	2312.9	24.07	0.693426
2024-05-12 17:30:00	2252	23.63	0.420727	2233.4	24.3	0.118304	2310.6	24.1	0.693426
2024-05-12 18:00:00	2249.4	23.43	0.41783	2224.8	24.28	0.118304	2309	23.97	0.693426
2024-05-12 18:30:00	2246.5	23.23	0.416869	2216.7	24.2	0.118577	2306.9	23.9	0.693426
2024-05-12 19:00:00	2243.1	23.02	0.414	2209	24.16	0.118577	2305.1	23.82	0.69024
2024-05-12 19:30:00	2240	22.6	0.410204	2203.1	23.92	0.118304	2303	23.6	0.69024
2024-05-12 20:00:00	2238.6	22.04	0.408319	2198.7	23.53	0.118577	2301	23.22	0.69024
2024-05-12 20:30:00	2237.2	21.4	0.406443	2195.6	23.04	0.118577	2299.3	22.75	0.691831
2024-05-12 21:00:00	2236.6	21.03	0.405509	2194	22.58	0.118577	2298.5	22.36	0.688652
2024-05-12 21:30:00	2236.2	20.87	0.404576	2192.8	22.22	0.118032	2298.2	22.07	0.688652
2024-05-12 22:00:00	2235.4	20.65	0.403645	2191.6	21.83	0.117761	2297.8	21.75	0.685488
2024-05-12 22:30:00	2235.4	20.36	0.403645	2190.7	21.45	0.11695	2297.2	21.44	0.682339
2024-05-12 23:00:00	2234.6	20.05	0.401791	2190	21.04	0.11749	2296.5	21.09	0.682339
2024-05-12 23:30:00	2234.5	19.76	0.400867	2189	20.68	0.11722	2295.9	20.77	0.680769
2024-05-13	2234.2	19.49	0.401791	2187.8	20.33	0.11695	2295.5	20.45	0.679204
2024-05-13 00:30:00	2233.8	19.22	0.400867	2187.1	19.99	0.116413	2295.1	20.14	0.677642
2024-05-13 01:00:00	2234.2	18.93	0.399945	2186.1	19.66	0.116145	2294.8	19.82	0.677642
2024-05-13 01:30:00	2234	18.66	0.399025	2184.8	19.36	0.114288	2294.5	19.52	0.674528
2024-05-13 02:00:00	2233.9	18.42	0.397192	2184.1	19.09	0.116145	2294.1	19.28	0.674528
2024-05-13 02:30:00	2233.4	18.22	0.399945	2183.3	18.85	0.115345	2293.9	19.05	0.672977
2024-05-13 03:00:00	2232.9	18.09	0.399025	2182.2	18.63	0.11508	2294	18.83	0.671429
2024-05-13 03:30:00	2232.2	18.07	0.398107	2181	18.54	0.115878	2293.3	18.7	0.672977
2024-05-13 04:00:00	2231.5	17.92	0.397192	2179.7	18.35	0.115611	2292.6	18.5	0.671429
2024-05-13 04:30:00	2230.2	17.9	0.394457	2178.1	18.3	0.114815	2292.2	18.39	0.668344
2024-05-13 05:00:00	2230	17.83	0.396278	2175.9	18.19	0.114551	2291.5	18.25	0.666807
2024-05-13 05:30:00	2228.6	17.83	0.394457	2173.9	18.1	0.114815	2290.9	18.15	0.666807
2024-05-13 06:00:00	2227.5	17.79	0.392645	2171.4	18.1	0.114288	2290.3	18.04	0.668344
2024-05-13 06:30:00	2225.7	17.75	0.39355	2168.3	18	0.113763	2289.5	17.96	0.668344
2024-05-13 07:00:00	2223.8	17.96	0.391742	2163.1	18.13	0.112202	2288.5	18.06	0.665273
2024-05-13 07:30:00	2220.3	18.27	0.389045	2156.2	18.41	0.110917	2286.6	18.29	0.662217
2024-05-13 08:00:00	2217.8	18.49	0.386367	2147.6	18.7	0.108893	2284.1	18.54	0.659174
2024-05-13 08:30:00	2213.1	18.64	0.385478	2137.5	18.94	0.107647	2280.7	18.81	0.656145
2024-05-13 09:00:00	2207	19.1	0.381944	2126.8	19.34	0.10617	2277.7	19.26	0.65013
2024-05-13 09:30:00	2198.1	20.32	0.376704	2113.8	19.93	0.103276	2273.9	19.88	0.648634
2024-05-13 10:00:00	2190.2	21.45	0.372392	2099.7	20.65	0.100693	2269.4	20.47	0.644169
2024-05-13 10:30:00	2182.5	22.06	0.370681	2086.3	21.22	0.0972747	2264.7	20.96	0.639735
2024-05-13 11:00:00	2176.1	22.21	0.364754	2075.4	21.74	0.0939723	2260.8	21.45	0.639735
2024-05-13 11:30:00	2270.6	22.27	0.464515	2287.4	21.8	0.13122	2412.4	21.66	0.887156
2024-05-13 12:00:00	2345.7	22.19	0.501187	2405.2	21.73	0.129122	2414.4	21.77	0.824138
2024-05-13 12:30:00	2340	22.3	0.462381	2402.3	21.91	0.116681	2404.6	22.12	0.794328
2024-05-13 13:00:00	2334.6	22.3	0.440555	2393.5	22.09	0.109648	2398.2	22.38	0.787046
2024-05-13 13:30:00	2329.1	22.3	0.427563	2382.6	22.27	0.10617	2393	22.55	0.781628
2024-05-13 14:00:00	2323.4	22.3	0.420727	2372.1	22.48	0.104232	2388.3	22.66	0.776247
2024-05-13 14:30:00	2317.9	22.35	0.416869	2360.6	22.65	0.101859	2384.1	22.78	0.774462
2024-05-13 15:00:00	2312.8	22.45	0.414	2347.9	22.78	0.100693	2380.4	22.86	0.770903
2024-05-13 15:30:00	2307	22.57	0.412098	2335.1	22.91	0.0988553	2376.9	22.96	0.767361
2024-05-13 16:00:00	2303	22.6	0.41115	2323.6	23.03	0.0990832	2373.7	23	0.765597
2024-05-13 16:30:00	2299.7	22.6	0.409261	2310.9	23.24	0.0986279	2370.7	23.07	0.760326
2024-05-13 17:00:00	2295.5	22.69	0.408319	2297.1	23.4	0.0981748	2367.9	23.2	0.760326
2024-05-13 17:30:00	2292.6	22.58	0.408319	2285.2	23.4	0.097949	2364.8	23.17	0.756833
2024-05-13 18:00:00	2289.5	22.3	0.405509	2274.7	23.26	0.0977237	2362.2	22.97	0.762079
2024-05-13 18:30:00	2286.7	22.1	0.404576	2263.6	23.2	0.0966051	2359.3	22.82	0.760326
2024-05-13 19:00:00	2283.8	22.02	0.405509	2252.6	23.2	0.0961612	2357.1	22.8	0.755092
2024-05-13 19:30:00	2281.5	21.74	0.404576	2244	23.08	0.0959401	2354.2	22.67	0.751623
2024-05-13 20:00:00	2279.6	21.3	0.401791	2237.7	22.8	0.0952796	2351.9	22.41	0.755092
2024-05-13 20:30:00	2278.8	20.79	0.401791	2232.8	22.43	0.0946237	2351.4	22.08	0.749894
2024-05-13 21:00:00	2277.9	20.5	0.401791	2229.1	22.06	0.0937562	2349.1	21.76	0.751623
2024-05-13 21:30:00	2277.4	20.29	0.399945	2226.8	21.67	0.0939723	2348.9	21.47	0.746449
2024-05-13 22:00:00	2276.7	20.01	0.398107	2225.1	21.27	0.0939723	2348.1	21.15	0.74817
2024-05-13 22:30:00	2276.6	19.73	0.399945	2223.8	20.88	0.0935406	2347.3	20.84	0.746449
2024-05-13 23:00:00	2276.6	19.46	0.399025	2222.4	20.5	0.0928966	2347.3	20.53	0.743019
2024-05-13 23:30:00	2276.7	19.17	0.398107	2220.9	20.12	0.0924698	2346.5	20.21	0.739605
2024-05-14	2276.1	18.86	0.398107	2219.5	19.74	0.0912011	2345.7	19.87	0.74131
2024-05-14 00:30:00	2276.5	18.52	0.397192	2217.4	19.37	0.0918333	2345.7	19.53	0.737904
2024-05-14 01:00:00	2276.4	18.23	0.398107	2216.2	19.04	0.0914113	2345.9	19.23	0.737904
2024-05-14 01:30:00	2276.2	18.01	0.397192	2214.7	18.76	0.0909913	2345.2	18.96	0.734514
2024-05-14 02:00:00	2275.8	17.9	0.396278	2213	18.54	0.0907821	2344.7	18.74	0.734514
2024-05-14 02:30:00	2275	17.97	0.396278	2211.2	18.48	0.0905733	2344.6	18.63	0.72778
2024-05-14 03:00:00	2274.1	17.85	0.396278	2209.1	18.37	0.0903649	2344.4	18.47	0.72778
2024-05-14 03:30:00	2273.6	17.88	0.396278	2207	18.3	0.0897429	2343.9	18.37	0.726106
2024-05-14 04:00:00	2272.1	17.78	0.395367	2204.9	18.21	0.0889201	2343	18.24	0.72778
2024-05-14 04:30:00	2271.2	17.8	0.395367	2202.7	18.14	0.0885116	2343	18.15	0.726106
2024-05-14 05:00:00	2270.1	17.78	0.394457	2200.2	18.1	0.088308	2342.6	18.09	0.724436
2024-05-14 05:30:00	2269.1	17.77	0.394457	2197.4	18.02	0.0874984	2341.3	17.99	0.72277
2024-05-14 06:00:00	2267.2	17.77	0.39355	2194.5	18	0.0857038	2341	17.9	0.724436
2024-05-14 06:30:00	2265.7	17.78	0.392645	2190.6	17.94	0.0860994	2340.1	17.9	0.72277
2024-05-14 07:00:00	2263.1	17.91	0.391742	2184.6	18.05	0.0862979	2338.8	17.96	0.721107
2024-05-14 07:30:00	2260.6	18.18	0.389942	2176	18.3	0.08531	2337.1	18.19	0.717794
2024-05-14 08:00:00	2255.8	18.39	0.38815	2165	18.58	0.0837529	2334.5	18.42	0.714496
2024-05-14 08:30:00	2250.1	18.56	0.385478	2152.8	18.83	0.0820352	2331.1	18.69	0.711214
2024-05-14 09:00:00	2242.3	19	0.383707	2139.5	19.19	0.0801678	2327.4	19.15	0.709578
2024-05-14 09:30:00	2231.6	20.21	0.380189	2124.6	19.72	0.0770903	2322.9	19.74	0.704693
2024-05-14 10:00:00	2219.4	21.42	0.376704	2108.5	20.49	0.0751623	2318.4	20.3	0.706318
2024-05-14 10:30:00	2210.3	21.96	0.374111	2094	21.05	0.0732825	2314	20.72	0.704693
2024-05-14 11:00:00	2203.4	21.97	0.369828	2081.3	21.41	0.0714496	2310.1	21.09	0.706318
2024-05-14 11:30:00	2196.1	22.07	0.365595	2070.9	21.76	0.0693426	2305.5	21.45	0.704693
2024-05-14 12:00:00	2188.9	22.18	0.363915	2060.5	22.03	0.0676083	2301.1	21.76	0.704693
2024-05-14 12:30:00	2182.9	22.14	0.358096	2050.8	22.14	0.0660693	2297	22.01	0.704693
2024-05-14 13:00:00	2177.1	22.1	0.356451	2041.7	22.27	0.0642688	2292.4	22.24	0.703072
2024-05-14 13:30:00	2172.1	22.09	0.353183	2033.7	22.4	0.0626614	2288.8	22.32	0.701455
2024-05-14 14:00:00	2179.1	22	0.363078	2031.2	22.53	0.0619441	2330.3	22.34	0.767361
2024-05-14 14:30:00	2204.9	21.83	0.400867	2031.4	22.53	0.0619441	2334.8	22.36	0.753356
2024-05-14 15:00:00	2212.6	21.98	0.405509	2030	22.65	0.0619441	2328.9	22.55	0.739605
2024-05-14 15:30:00	2212.3	22.15	0.402717	2028.9	22.74	0.0619441	2324.7	22.67	0.736207
2024-05-14 16:00:00	2210.4	22.27	0.403645	2027.8	22.89	0.0619441	2322.1	22.81	0.734514
2024-05-14 16:30:00	2209	22.3	0.400867	2027.1	23.13	0.0619441	2319.1	22.92	0.731139
2024-05-14 17:00:00	2206	22.3	0.397192	2025.7	23.26	0.0619441	2315.8	23	0.729458
2024-05-14 17:30:00	2204.3	22.3	0.394457	2025	23.3	0.0619441	2313.1	23	0.729458
2024-05-14 18:00:00	2202.2	22.16	0.391742	2023.6	23.21	0.0619441	2311.4	22.89	0.72778
2024-05-14 18:30:00	2200.1	22.11	0.389045	2022.9	23.2	0.0620869	2309.6	22.81	0.72277
2024-05-14 19:00:00	2196.9	22.17	0.387258	2022.3	23.29	0.0620869	2307.5	22.89	0.721107
2024-05-14 19:30:00	2194.8	22.01	0.381066	2021.2	23.18	0.06223	2304.9	22.78	0.72277
2024-05-14 20:00:00	2193.1	21.71	0.381066	2020.3	22.97	0.0623735	2302.6	22.61	0.72277
2024-05-14 20:30:00	2191.3	21.3	0.378443	2020.4	22.65	0.0625173	2300.5	22.34	0.724436
2024-05-14 21:00:00	2190.9	21	0.375837	2020.1	22.3	0.0625173	2299.2	22.06	0.72277
2024-05-14 21:30:00	2189.5	20.87	0.375837	2019.9	22	0.06223	2298.7	21.8	0.72277
2024-05-14 22:00:00	2189.3	20.75	0.375837	2019.9	21.7	0.06223	2298.2	21.59	0.721107
2024-05-14 22:30:00	2188.5	20.59	0.374973	2019.8	21.41	0.06223	2297.2	21.36	0.719449
2024-05-14 23:00:00	2188.1	20.41	0.37325	2019.7	21.1	0.06223	2296.5	21.14	0.721107
2024-05-14 23:30:00	2187.8	20.21	0.37325	2019.6	20.83	0.0620869	2295.7	20.92	0.719449
2024-05-15	2187.5	19.98	0.37325	2019.6	20.54	0.06223	2294.8	20.69	0.716143
2024-05-15 00:30:00	2186.4	19.76	0.372392	2019.7	20.28	0.0619441	2294.3	20.47	0.716143
2024-05-15 01:00:00	2185.9	19.58	0.37325	2020	20.05	0.0619441	2293.6	20.27	0.714496
2024-05-15 01:30:00	2186	19.44	0.370681	2019.6	19.85	0.0619441	2293.3	20.11	0.712853
2024-05-15 02:00:00	2185.4	19.31	0.371535	2019.7	19.67	0.0620869	2292.8	19.94	0.712853
2024-05-15 02:30:00	2184.9	19.13	0.371535	2019.6	19.48	0.0619441	2292.3	19.75	0.709578
2024-05-15 03:00:00	2184.7	18.91	0.370681	2018.9	19.28	0.0618016	2291.5	19.53	0.709578
2024-05-15 03:30:00	2184.7	18.64	0.369828	2018.8	19.02	0.0619441	2291.1	19.32	0.709578
2024-05-15 04:00:00	2184.1	18.37	0.370681	2018.8	18.77	0.0620869	2290.7	19.07	0.706318
2024-05-15 04:30:00	2183.7	18.37	0.369828	2019	18.63	0.0620869	2290.3	18.93	0.706318
2024-05-15 05:00:00	2183.2	18.2	0.368978	2018.5	18.51	0.06223	2289.4	18.75	0.706318
2024-05-15 05:30:00	2182.6	18.02	0.367282	2018.3	18.36	0.0619441	2288.8	18.56	0.701455
2024-05-15 06:00:00	2181.8	17.97	0.366438	2018.2	18.27	0.0620869	2288.2	18.44	0.703072
2024-05-15 06:30:00	2180.9	17.97	0.368129	2018	18.2	0.0619441	2287.6	18.32	0.704693
2024-05-15 07:00:00	2179.2	18.06	0.367282	2017.5	18.24	0.0619441	2286.5	18.35	0.701455
2024-05-15 07:30:00	2176.7	18.37	0.364754	2016.3	18.5	0.0618016	2284.8	18.56	0.698232
2024-05-15 08:00:00	2173.9	18.72	0.364754	2015.2	18.84	0.061235	2282	18.83	0.695024
2024-05-15 08:30:00	2169.7	18.91	0.363078	2013.5	19.11	0.0609537	2278.5	19.08	0.691831
2024-05-15 09:00:00	2164.5	19.3	0.358922	2011.9	19.41	0.060256	2274.7	19.45	0.685488
2024-05-15 09:30:00	2157.3	20.33	0.358096	2008.8	19.94	0.0588844	2270.4	20	0.677642
2024-05-15 10:00:00	2149.2	21.17	0.354813	2005.5	20.62	0.0574116	2265.1	20.5	0.674528
2024-05-15 10:30:00	2142.4	21.49	0.34914	2002.9	21.24	0.0567545	2259.5	20.86	0.669885
2024-05-15 11:00:00	2135.7	21.65	0.34435	2000.5	21.71	0.055847	2254.6	21.21	0.666807
2024-05-15 11:30:00	2130.2	21.87	0.338065	1999	22.13	0.0549541	2249.7	21.55	0.662217
2024-05-15 12:00:00	2125	22.11	0.334965	1997.7	22.41	0.054325	2244.5	21.88	0.657658
2024-05-15 12:30:00	2171.5	22.26	0.403645	2030	22.48	0.0688652	2311.6	22.15	0.78343
2024-05-15 13:00:00	2362.6	21.76	0.578096	2142.2	22.12	0.139959	2463.3	21.7	0.97499
2024-05-15 13:30:00	2362.6	21.97	0.510505	2166	22.34	0.16293	2444.1	21.92	0.895365
2024-05-15 14:00:00	2356.3	22.19	0.476431	2172.5	22.66	0.172187	2436.8	22.19	0.877001
2024-05-15 14:30:00	2349.2	22.38	0.456037	2173.1	22.92	0.175792	2431.1	22.42	0.86896
2024-05-15 15:00:00	2342.1	22.61	0.443609	2169.8	23.15	0.174985	2426.3	22.68	0.862979
2024-05-15 15:30:00	2335.9	22.91	0.438531	2165	23.4	0.171791	2422.1	22.93	0.860994
2024-05-15 16:00:00	2330.1	23.12	0.432514	2159.1	23.68	0.170216	2418.4	23.15	0.857038
2024-05-15 16:30:00	2324.6	23.25	0.430527	2152.2	24	0.164816	2415.2	23.35	0.855067
2024-05-15 17:00:00	2320.3	23.38	0.428549	2144.9	24.22	0.162181	2411.7	23.55	0.8531
2024-05-15 17:30:00	2315.7	23.49	0.427563	2137	24.39	0.157398	2408.4	23.71	0.84918
2024-05-15 18:00:00	2311	23.73	0.425598	2128.2	24.65	0.154525	2405.3	23.95	0.847227
2024-05-15 18:30:00	2306.3	23.84	0.42462	2120.4	24.87	0.149968	2402.1	24.1	0.847227
2024-05-15 19:00:00	2301.6	23.75	0.423643	2113.5	24.93	0.146218	2398.9	24.1	0.847227
2024-05-15 19:30:00	2298.5	23.45	0.420727	2108.2	24.81	0.142889	2396.4	23.98	0.847227
2024-05-15 20:00:00	2296	23.01	0.419759	2104.4	24.54	0.139959	2393.6	23.74	0.845279
2024-05-15 20:30:00	2294.9	22.44	0.416869	2101.2	24.12	0.136773	2391.3	23.4	0.847227
2024-05-15 21:00:00	2293.9	21.88	0.414954	2098.9	23.6	0.133968	2389.7	22.96	0.843335
2024-05-15 21:30:00	2293.1	21.56	0.416869	2097.2	23.15	0.131826	2388.4	22.63	0.843335
2024-05-15 22:00:00	2292.3	21.27	0.412098	2095.6	22.73	0.129718	2387.3	22.32	0.83946
2024-05-15 22:30:00	2291.8	20.96	0.414954	2094.3	22.3	0.129122	2386.5	22.03	0.83946
2024-05-15 23:00:00	2291.7	20.63	0.413048	2093	21.89	0.126765	2385.4	21.73	0.833681
2024-05-15 23:30:00	2291.4	20.3	0.413048	2091.8	21.47	0.125314	2384.7	21.43	0.833681
2024-05-16	2290.9	20	0.412098	2091	21.07	0.123027	2384	21.13	0.829851
2024-05-16 00:30:00	2291.1	19.71	0.41115	2089.9	20.72	0.121339	2382.9	20.86	0.827942
2024-05-16 01:00:00	2290.2	19.45	0.410204	2089.1	20.36	0.120226	2382.1	20.56	0.826038
2024-05-16 01:30:00	2290.9	19.17	0.40738	2088	20.03	0.11885	2381.8	20.27	0.826038
2024-05-16 02:00:00	2290.6	18.88	0.408319	2087	19.67	0.116145	2380.5	19.96	0.820352
2024-05-16 02:30:00	2290.2	18.57	0.406443	2086.1	19.36	0.11508	2380.2	19.66	0.822243
2024-05-16 03:00:00	2289.5	18.32	0.40738	2084.8	19.07	0.114551	2379.8	19.39	0.816582
2024-05-16 03:30:00	2288.7	18.29	0.406443	2083.6	18.9	0.113501	2379.2	19.22	0.818465
2024-05-16 04:00:00	2288.5	18.1	0.403645	2083.1	18.74	0.11246	2378.8	19.02	0.814704
2024-05-16 04:30:00	2286.7	18.03	0.400867	2082.5	18.58	0.110154	2378.1	18.85	0.810961
2024-05-16 05:00:00	2286.7	17.9	0.403645	2081.3	18.45	0.110408	2377.2	18.68	0.812831
2024-05-16 05:30:00	2284.8	17.81	0.403645	2080.2	18.33	0.109901	2376.8	18.53	0.812831
2024-05-16 06:00:00	2283.6	17.8	0.401791	2079.3	18.25	0.108643	2375.8	18.42	0.807235
2024-05-16 06:30:00	2282	17.78	0.401791	2077.6	18.17	0.107399	2375.2	18.31	0.805378
2024-05-16 07:00:00	2279.9	17.8	0.399025	2075.2	18.14	0.105196	2374.1	18.3	0.805378
2024-05-16 07:30:00	2277	18.07	0.398107	2071.7	18.35	0.103514	2372.4	18.43	0.803526
2024-05-16 08:00:00	2272.4	18.42	0.396278	2066.9	18.66	0.101391	2369.5	18.68	0.797995
2024-05-16 08:30:00	2265.8	18.64	0.39355	2061.6	18.94	0.09977	2366.5	18.9	0.794328
2024-05-16 09:00:00	2256	19.18	0.389942	2056.2	19.31	0.0968278	2363.4	19.34	0.796159
2024-05-16 09:30:00	2243.7	20.17	0.385478	2049.4	19.86	0.0931108	2358.9	19.9	0.792501
2024-05-16 10:00:00	2231.8	20.9	0.382825	2041.8	20.46	0.0901571	2354	20.34	0.794328
2024-05-16 10:30:00	2221.3	21.1	0.374973	2033.7	20.96	0.0870964	2349	20.68	0.792501
2024-05-16 11:00:00	2211.2	21.2	0.372392	2026.5	21.38	0.0818465	2344.9	20.99	0.796159
2024-05-16 11:30:00	2201.7	21.48	0.367282	2018.7	21.74	0.0787046	2339.2	21.31	0.792501
2024-05-16 12:00:00	2192.7	21.91	0.358922	2012.7	22.09	0.074817	2335.3	21.63	0.794328
2024-05-16 12:30:00	2185.3	22.17	0.357273	2007.6	22.31	0.0712853	2331.2	21.89	0.796159
2024-05-16 13:00:00	2177.5	22.31	0.354813	2003.3	22.56	0.0682339	2326.8	22.14	0.792501
2024-05-16 13:30:00	2170	22.33	0.35156	1999.9	22.81	0.0656145	2323	22.29	0.790679
2024-05-16 14:00:00	2164	22.4	0.348337	1997.7	23.08	0.063387	2318.2	22.47	0.78886
2024-05-16 14:30:00	2159.2	22.4	0.345939	1995.8	23.33	0.0620869	2314.2	22.64	0.785236
2024-05-16 15:00:00	2153.3	22.54	0.341979	1994.5	23.59	0.0605341	2311.1	22.79	0.78343
2024-05-16 15:30:00	2149	22.68	0.341193	1992.8	23.82	0.0595662	2307.5	22.95	0.781628
2024-05-16 16:00:00	2144.9	22.8	0.339625	1991.9	24.03	0.0586138	2304.7	23.08	0.77983
2024-05-16 16:30:00	2142.2	22.71	0.337287	1990.9	24.25	0.0580764	2302.4	23.1	0.778037
2024-05-16 17:00:00	2140.3	22.51	0.336512	1990.1	24.35	0.0574116	2299.4	23.1	0.776247
2024-05-16 17:30:00	2137.7	22.4	0.334965	1989.4	24.4	0.0568853	2296	23.1	0.776247
2024-05-16 18:00:00	2135.5	22.33	0.33266	1989.2	24.48	0.0559758	2292.5	23.06	0.772681
2024-05-16 18:30:00	2133	22.2	0.33266	1988.4	24.5	0.055847	2289.5	22.99	0.767361
2024-05-16 19:00:00	2130.8	21.94	0.328852	1988.1	24.46	0.055847	2286.6	22.82	0.765597
2024-05-16 19:30:00	2129.9	21.47	0.328095	1987.8	24.2	0.0554626	2283.8	22.52	0.763836
2024-05-16 20:00:00	2128.4	20.92	0.328852	1987.6	23.83	0.0552077	2281.4	22.16	0.762079
2024-05-16 20:30:00	2127.3	20.57	0.327341	1987.6	23.46	0.0549541	2279.2	21.89	0.756833
2024-05-16 21:00:00	2126.1	20.4	0.326588	1987.2	23.09	0.0549541	2278.2	21.63	0.758578
2024-05-16 21:30:00	2125.1	20.12	0.325087	1987.3	22.62	0.0545758	2277.4	21.3	0.756833
2024-05-16 22:00:00	2124.4	19.86	0.325087	1987.2	22.15	0.0542001	2276.5	20.99	0.755092
2024-05-16 22:30:00	2123.6	19.64	0.32434	1987.2	21.73	0.0539511	2276.4	20.74	0.755092
2024-05-16 23:00:00	2123.1	19.46	0.325087	1987.5	21.35	0.053827	2275.6	20.5	0.753356
2024-05-16 23:30:00	2122.3	19.31	0.323594	1987.5	21.01	0.0539511	2274.5	20.28	0.755092
2024-05-17	2121.9	19.13	0.322107	1987.8	20.7	0.0539511	2273.9	20.07	0.753356
2024-05-17 00:30:00	2121.2	18.93	0.322107	1987.4	20.38	0.053827	2273.2	19.84	0.749894
2024-05-17 01:00:00	2120.7	18.69	0.322849	1987.7	20.07	0.0535797	2272.7	19.61	0.749894
2024-05-17 01:30:00	2120.3	18.4	0.320627	1987.8	19.74	0.0535797	2272	19.38	0.74817
2024-05-17 02:00:00	2119.9	18.2	0.319154	1987.6	19.46	0.0537032	2271.4	19.14	0.744732
2024-05-17 02:30:00	2119.2	18.16	0.31989	1987.3	19.28	0.0535797	2270.9	18.98	0.746449
2024-05-17 03:00:00	2118.6	17.94	0.322107	1987.2	19.09	0.0537032	2270.3	18.78	0.744732
2024-05-17 03:30:00	2117.9	17.93	0.321366	1987.2	18.96	0.0532108	2269.7	18.65	0.74131
2024-05-17 04:00:00	2117	17.88	0.321366	1987.4	18.81	0.0533335	2269.3	18.49	0.74131
2024-05-17 04:30:00	2116.1	17.81	0.31842	1987.5	18.72	0.0535797	2268.6	18.36	0.739605
2024-05-17 05:00:00	2115.3	17.77	0.3155	1987.5	18.6	0.0530884	2267.9	18.27	0.734514
2024-05-17 05:30:00	2114.2	17.77	0.314051	1987.2	18.51	0.0529663	2267.2	18.16	0.734514
2024-05-17 06:00:00	2113.2	17.7	0.316957	1987.4	18.42	0.0532108	2266.4	18.05	0.734514
2024-05-17 06:30:00	2111.8	17.69	0.317687	1987	18.37	0.0530884	2265.5	18	0.732825
2024-05-17 07:00:00	2110	17.94	0.316228	1987.1	18.43	0.0529663	2264	18.06	0.72778
2024-05-17 07:30:00	2107.5	18.18	0.314051	1987.2	18.62	0.0529663	2262	18.24	0.72277
2024-05-17 08:00:00	2105	18.51	0.30903	1986.7	18.9	0.0528445	2259.4	18.48	0.714496
2024-05-17 08:30:00	2101.7	18.91	0.306196	1986.5	19.23	0.052723	2256.5	18.76	0.711214
2024-05-17 09:00:00	2096.1	19.51	0.306902	1986.3	19.63	0.0524807	2252.8	19.22	0.701455
2024-05-17 09:30:00	2088.8	20.6	0.304789	1986.1	20.26	0.0522396	2248	19.84	0.693426
2024-05-17 10:00:00	2081.9	21.44	0.301995	2100.4	20.7	0.0950605	2242.4	20.36	0.685488
2024-05-17 10:30:00	2412.9	20.2	0.366438	2343.5	19.98	0.156675	2577.1	19.14	0.618016
2024-05-17 11:00:00	2534	20.05	0.220293	2355.6	20.35	0.131826	2625.9	18.77	0.42462
2024-05-17 11:30:00	2516.6	20.76	0.184502	2353.5	20.81	0.121899	2615	19.45	0.425598
2024-05-17 12:00:00	2499.2	21.3	0.170608	2348.7	21.17	0.117761	2606.4	20	0.431519
2024-05-17 12:30:00	2485	21.66	0.162181	2342.4	21.47	0.114551	2598.4	20.44	0.436516
2024-05-17 13:00:00	2473.1	21.98	0.158125	2335.9	21.71	0.110917	2590.7	20.79	0.443609
2024-05-17 13:30:00	2461.3	22.1	0.156675	2327.9	21.95	0.108893	2584.3	21.08	0.448745
2024-05-17 14:00:00	2450.6	22.23	0.155955	2319.7	22.16	0.10666	2577.7	21.32	0.456037
2024-05-17 14:30:00	2440.6	22.3	0.156675	2310.5	22.33	0.105439	2570.2	21.54	0.464515
2024-05-17 15:00:00	2431.6	22.3	0.157036	2301.5	22.44	0.104232	2563.3	21.68	0.472063
2024-05-17 15:30:00	2423	22.23	0.158125	2294.4	22.5	0.102094	2557.8	21.77	0.47863
2024-05-17 16:00:00	2416.2	22.12	0.159221	2285.8	22.52	0.100462	2552.9	21.82	0.484172
2024-05-17 16:30:00	2409.7	21.99	0.162555	2278	22.64	0.0990832	2548.4	21.9	0.490908
2024-05-17 17:00:00	2404.6	21.9	0.163305	2270	22.73	0.097499	2544.5	21.95	0.497737
2024-05-17 17:30:00	2399.1	21.82	0.164437	2260.5	22.8	0.0954993	2539.8	22	0.502343
2024-05-17 18:00:00	2394	21.52	0.165196	2251.4	22.79	0.0935406	2535.2	21.96	0.510505
2024-05-17 18:30:00	2389.1	21.01	0.166341	2244.8	22.61	0.091622	2531.8	21.77	0.516416
2024-05-17 19:00:00	2385.4	20.5	0.166725	2239.2	22.29	0.0905733	2529.5	21.5	0.522396
2024-05-17 19:30:00	2381.7	20.14	0.165959	2234.9	21.99	0.0887156	2527	21.26	0.526017
2024-05-17 20:00:00	2377.6	19.89	0.166725	2230.7	21.71	0.086896	2524.7	21.08	0.529663
2024-05-17 20:30:00	2374.4	19.77	0.167109	2226.5	21.51	0.0857038	2523.1	20.93	0.532108
2024-05-17 21:00:00	2371.6	19.63	0.16788	2225	21.27	0.0847227	2521.7	20.72	0.533335
2024-05-17 21:30:00	2369.8	19.4	0.168655	2223.8	20.9	0.0831764	2521.6	20.46	0.535797
2024-05-17 22:00:00	2368.2	19.1	0.169824	2222.2	20.49	0.0814704	2521.3	20.2	0.53827
2024-05-17 22:30:00	2366.6	18.76	0.170608	2221.3	20.07	0.0812831	2521.1	19.9	0.534564
2024-05-17 23:00:00	2365.6	18.42	0.171396	2220.1	19.68	0.0801678	2520.9	19.61	0.53827
2024-05-17 23:30:00	2364.1	18.21	0.171791	2218.2	19.39	0.0792501	2521.1	19.39	0.537032
2024-05-18	2362.4	18.13	0.172187	2216.8	19.17	0.077983	2520.8	19.19	0.537032
2024-05-18 00:30:00	2360.2	18.07	0.172187	2215.2	18.98	0.0770903	2520.6	19.02	0.537032
2024-05-18 01:00:00	2358.4	17.92	0.172584	2213.8	18.81	0.0767361	2520.5	18.81	0.539511
2024-05-18 01:30:00	2356.9	17.87	0.172982	2212.2	18.64	0.0762079	2520.2	18.65	0.53827
2024-05-18 02:00:00	2355.1	17.73	0.17378	2210.6	18.47	0.0753356	2519.7	18.48	0.540754
2024-05-18 02:30:00	2353	17.69	0.17338	2208.9	18.34	0.0746449	2519.4	18.35	0.539511
2024-05-18 03:00:00	2351.3	17.66	0.174181	2207.2	18.22	0.0739605	2518.8	18.23	0.540754
2024-05-18 03:30:00	2349.1	17.62	0.17378	2205.5	18.11	0.0731139	2518.2	18.13	0.540754
2024-05-18 04:00:00	2347.4	17.6	0.174181	2203.8	18.02	0.072778	2517.9	18.05	0.542001
2024-05-18 04:30:00	2345.9	17.6	0.174985	2202	17.92	0.0721107	2517.2	17.95	0.542001
2024-05-18 05:00:00	2344.2	17.52	0.174985	2200.3	17.87	0.0719449	2516.9	17.88	0.542001
2024-05-18 05:30:00	2342.4	17.49	0.175388	2198.4	17.8	0.0711214	2516.4	17.8	0.540754
2024-05-18 06:00:00	2339.7	17.46	0.175792	2196.4	17.8	0.0704693	2515.6	17.73	0.540754
2024-05-18 06:30:00	2337	17.52	0.176198	2194.2	17.72	0.0701455	2514.9	17.7	0.540754
2024-05-18 07:00:00	2333.1	17.75	0.174985	2190.3	17.83	0.0691831	2513.2	17.76	0.54325
2024-05-18 07:30:00	2328.4	18	0.176604	2185	18.06	0.0683912	2510.6	17.95	0.544503
2024-05-18 08:00:00	2323.1	18.23	0.177011	2179.1	18.32	0.0676083	2507.9	18.13	0.545758
2024-05-18 08:30:00	2317.1	18.53	0.177419	2171.7	18.6	0.0663743	2504.6	18.34	0.549541
2024-05-18 09:00:00	2308.7	18.96	0.177011	2162.6	18.92	0.0651628	2501	18.61	0.552077
2024-05-18 09:30:00	2296.1	19.77	0.178238	2152.4	19.38	0.0635331	2496.2	19.03	0.555904
2024-05-18 10:00:00	2281.6	20.54	0.177828	2140	19.9	0.0616595	2489.8	19.46	0.564937
2024-05-18 10:30:00	2266.4	21.13	0.177419	2127.5	20.42	0.0598412	2483.5	19.87	0.571479
2024-05-18 11:00:00	2252.7	21.5	0.176604	2116.6	20.85	0.058479	2477.5	20.2	0.579429
2024-05-18 11:30:00	2239.8	21.85	0.178238	2105.6	21.28	0.0567545	2471.5	20.54	0.58479
2024-05-18 12:00:00	2226.1	22.14	0.177828	2094.4	21.67	0.0547016	2465.1	20.88	0.591562
2024-05-18 12:30:00	2214.7	22.28	0.178238	2084	21.99	0.0530884	2459	21.14	0.598412
2024-05-18 13:00:00	2204.5	22.39	0.178238	2075.3	22.19	0.0512861	2453.3	21.34	0.605341
2024-05-18 13:30:00	2193.5	22.42	0.179887	2066.4	22.39	0.0496592	2447.6	21.56	0.610942
2024-05-18 14:00:00	2185.4	22.51	0.181134	2058.6	22.6	0.0484172	2442.8	21.75	0.618016
2024-05-18 14:30:00	2178.5	22.66	0.181552	2052.3	22.8	0.0473151	2438.5	21.95	0.618016
2024-05-18 15:00:00	2171.6	22.8	0.18281	2046.9	22.97	0.0460257	2433.9	22.14	0.625173
2024-05-18 15:30:00	2164.9	22.77	0.184502	2041.6	23.09	0.0450817	2429.1	22.23	0.626614
2024-05-18 16:00:00	2160	22.76	0.186209	2037.5	23.17	0.0443609	2425.1	22.31	0.63387
2024-05-18 16:30:00	2155.4	22.61	0.187068	2032.5	23.2	0.0435512	2420.6	22.38	0.632412
2024-05-18 17:00:00	2151.5	22.42	0.187499	2028.3	23.3	0.0425598	2416.5	22.4	0.639735
2024-05-18 17:30:00	2147.6	22.24	0.187932	2024.6	23.3	0.0416869	2412.1	22.4	0.644169
2024-05-18 18:00:00	2352.9	21.38	0.235505	2388.1	22.02	0.0862979	2585.9	21.71	0.529663
2024-05-18 18:30:00	2448.9	20.55	0.201837	2422.3	21.4	0.0831764	2595.9	21.24	0.472063
2024-05-18 19:00:00	2448.9	20.26	0.179887	2412.8	21.48	0.0797995	2592.3	21.18	0.464515
2024-05-18 19:30:00	2444.8	20.11	0.167494	2406.4	21.4	0.0792501	2590	21.1	0.460257
2024-05-18 20:00:00	2441.1	20.19	0.159588	2402.4	21.4	0.0781628	2588.4	21.02	0.461318
2024-05-18 20:30:00	2438	20.13	0.154525	2397.4	21.37	0.0774462	2587.5	20.93	0.460257
2024-05-18 21:00:00	2435.7	19.84	0.150661	2393.4	21.14	0.0770903	2586.4	20.66	0.459198
2024-05-18 21:30:00	2434.5	19.41	0.148252	2390.7	20.75	0.0765597	2586.4	20.35	0.458142
2024-05-18 22:00:00	2433.1	18.95	0.146218	2389	20.34	0.0760326	2586.9	20.03	0.457088
2024-05-18 22:30:00	2431.9	18.71	0.144877	2387.4	19.99	0.0755092	2587.3	19.74	0.458142
2024-05-18 23:00:00	2430.6	18.41	0.143549	2386.2	19.67	0.0753356	2587.5	19.48	0.456037
2024-05-18 23:30:00	2428.8	18.28	0.143219	2384.3	19.41	0.0749894	2587.6	19.26	0.454988
2024-05-19	2427.5	18.15	0.142561	2383.2	19.18	0.074817	2588	19.05	0.453942
2024-05-19 00:30:00	2426.1	18.02	0.141906	2382.3	18.97	0.0744732	2587.9	18.84	0.454988
2024-05-19 01:00:00	2424.5	17.9	0.140929	2381.2	18.76	0.0739605	2588.1	18.66	0.453942
2024-05-19 01:30:00	2423.3	17.8	0.139959	2380.4	18.58	0.0732825	2588.3	18.47	0.452898
2024-05-19 02:00:00	2421.5	17.73	0.139959	2379.4	18.44	0.0729458	2588.4	18.34	0.452898
2024-05-19 02:30:00	2419.8	17.73	0.139959	2378.3	18.33	0.072778	2588.2	18.25	0.451856
2024-05-19 03:00:00	2418.3	17.65	0.139959	2376.9	18.23	0.072277	2588.1	18.13	0.450817
2024-05-19 03:30:00	2416.5	17.63	0.140281	2376	18.16	0.0721107	2588	18.07	0.448745
2024-05-19 04:00:00	2414.6	17.64	0.140281	2374.3	18.1	0.0719449	2587.7	18	0.444631
2024-05-19 04:30:00	2412.6	17.6	0.139959	2373	18.04	0.0719449	2587.1	17.92	0.447713
2024-05-19 05:00:00	2410.9	17.6	0.139959	2371.2	18	0.0714496	2587.1	17.88	0.447713
2024-05-19 05:30:00	2408.6	17.6	0.140281	2369.7	17.93	0.0709578	2586.5	17.8	0.447713
2024-05-19 06:00:00	2406.9	17.53	0.140281	2367.6	17.9	0.0707946	2586.2	17.76	0.445656
2024-05-19 06:30:00	2404.1	17.6	0.140281	2365.9	17.9	0.0704693	2585.5	17.7	0.444631
2024-05-19 07:00:00	2401.1	17.6	0.139959	2363.4	17.9	0.0699842	2584.8	17.73	0.443609
2024-05-19 07:30:00	2397.3	17.74	0.139637	2359.2	18.03	0.0695024	2583	17.82	0.443609
2024-05-19 08:00:00	2392.6	17.94	0.139959	2355.2	18.18	0.069024	2580.7	17.94	0.445656
2024-05-19 08:30:00	2383.4	18.4	0.140929	2348.5	18.45	0.0683912	2576.9	18.22	0.444631
2024-05-19 09:00:00	2369.5	19.15	0.140605	2337.6	18.89	0.0677642	2572.1	18.67	0.448745
2024-05-19 09:30:00	2356.8	19.8	0.140929	2327.4	19.37	0.0668344	2566.6	19.09	0.450817
2024-05-19 10:00:00	2345.6	20.35	0.141906	2317.1	19.83	0.0660693	2561.8	19.45	0.451856
2024-05-19 10:30:00	2336	20.76	0.141906	2305	20.28	0.0653131	2557	19.79	0.454988
2024-05-19 11:00:00	2322.2	21.1	0.142561	2289.6	20.68	0.064121	2550.8	20.13	0.458142
2024-05-19 11:30:00	2305.9	21.46	0.142889	2271.8	21.05	0.0625173	2544.4	20.46	0.460257
2024-05-19 12:00:00	2289.4	21.75	0.142233	2253.1	21.37	0.0608135	2538.1	20.73	0.464515
2024-05-19 12:30:00	2275.6	21.99	0.143219	2236.3	21.7	0.0594292	2532.8	21	0.466659
2024-05-19 13:00:00	2267.1	22.09	0.144212	2224.7	21.93	0.0583445	2528	21.17	0.467735
2024-05-19 13:30:00	2257	22.26	0.145211	2212.2	22.18	0.0567545	2523.3	21.4	0.469894
2024-05-19 14:00:00	2244.2	22.55	0.145546	2195.5	22.47	0.0550808	2517.7	21.7	0.472063
2024-05-19 14:30:00	2234.3	22.68	0.145211	2183.3	22.71	0.0537032	2512.6	21.89	0.474242
2024-05-19 15:00:00	2228.3	22.51	0.146893	2175.1	22.77	0.0529663	2509.1	21.9	0.475335
2024-05-19 15:30:00	2222.3	22.4	0.149279	2167.8	22.76	0.0521195	2505.8	21.94	0.476431
2024-05-19 16:00:00	2216.4	22.4	0.149624	2159.6	22.85	0.0508159	2501.9	22.06	0.477529
2024-05-19 16:30:00	2212.1	22.37	0.151356	2153.8	22.9	0.0501187	2498.8	22.1	0.477529
2024-05-19 17:00:00	2207.3	22.37	0.151705	2147.9	22.91	0.0494311	2495.6	22.14	0.479733
2024-05-19 17:30:00	2201.9	22.42	0.152405	2140.1	23	0.0487528	2491.1	22.22	0.481948
2024-05-19 18:00:00	2197.7	22.01	0.152757	2133.8	22.99	0.0480839	2487	22.18	0.484172
2024-05-19 18:30:00	2195	21.24	0.154882	2128.3	22.75	0.0474242	2483.5	21.94	0.485289
2024-05-19 19:00:00	2193.6	20.67	0.155239	2125.1	22.38	0.0469894	2481.5	21.62	0.487528
2024-05-19 19:30:00	2191.6	20.29	0.157036	2122	22.05	0.0463447	2479.3	21.37	0.484172
2024-05-19 20:00:00	2189	20.06	0.157398	2119.3	21.79	0.0460257	2476.8	21.19	0.487528
2024-05-19 20:30:00	2187.3	20.05	0.157761	2117	21.63	0.0459198	2475.2	21.08	0.485289
2024-05-19 21:00:00	2185.5	19.92	0.159221	2115.6	21.47	0.0459198	2474.2	20.9	0.485289
2024-05-19 21:30:00	2184.1	19.55	0.159588	2114.1	21.04	0.0459198	2473.8	20.58	0.486407
2024-05-19 22:00:00	2184.1	19.11	0.161065	2113.1	20.59	0.0456037	2473.7	20.26	0.485289
2024-05-19 22:30:00	2183.3	18.68	0.162181	2112.3	20.15	0.044978	2473.9	19.9	0.485289
2024-05-19 23:00:00	2182.2	18.47	0.163305	2111.3	19.79	0.044978	2473.9	19.61	0.483059
2024-05-19 23:30:00	2181.5	18.27	0.164059	2110.5	19.51	0.044978	2473.9	19.38	0.483059
2024-05-20	2180.4	18.1	0.165577	2109.5	19.25	0.0448745	2474	19.14	0.483059
2024-05-20 00:30:00	2178.9	17.95	0.166341	2108.8	19.01	0.0445656	2474.1	18.92	0.483059
2024-05-20 01:00:00	2177.6	17.87	0.166341	2108.1	18.79	0.044157	2473.7	18.72	0.480839
2024-05-20 01:30:00	2176.1	17.8	0.165196	2107.5	18.6	0.0440555	2473.6	18.54	0.479733
2024-05-20 02:00:00	2174.6	17.71	0.166341	2106.5	18.44	0.0440555	2473.3	18.39	0.480839
2024-05-20 02:30:00	2173	17.67	0.167109	2105.5	18.3	0.0439542	2472.9	18.25	0.479733
2024-05-20 03:00:00	2171.5	17.62	0.168267	2104.7	18.15	0.0437522	2472.5	18.11	0.479733
2024-05-20 03:30:00	2169.8	17.57	0.169434	2103.6	18.04	0.0437522	2471.9	17.98	0.477529
2024-05-20 04:00:00	2168.1	17.57	0.169434	2102.7	17.92	0.043451	2471.4	17.87	0.47863
2024-05-20 04:30:00	2166.2	17.6	0.169044	2101.5	17.87	0.0430527	2471.3	17.78	0.479733
2024-05-20 05:00:00	2164.2	17.6	0.169434	2100.8	17.8	0.0430527	2470.7	17.67	0.47863
2024-05-20 05:30:00	2162.6	17.54	0.169434	2099.4	17.7	0.0430527	2470	17.58	0.476431
2024-05-20 06:00:00	2160.6	17.47	0.169434	2098.2	17.65	0.0429536	2469.1	17.49	0.476431
2024-05-20 06:30:00	2158.2	17.47	0.169434	2096.8	17.6	0.0429536	2467.8	17.4	0.475335
2024-05-20 07:00:00	2155.3	17.4	0.169824	2094.6	17.62	0.0425598	2466.2	17.41	0.475335
2024-05-20 07:30:00	2151.7	17.56	0.169824	2090.7	17.76	0.0419759	2463.3	17.54	0.474242
2024-05-20 08:00:00	2146.6	17.88	0.171396	2086.7	18.02	0.0416869	2459.6	17.74	0.474242
2024-05-20 08:30:00	2138.3	18.46	0.169824	2081.7	18.41	0.0409261	2454.5	18.1	0.475335
2024-05-20 09:00:00	2128	19.26	0.169044	2075	18.93	0.0399945	2448.8	18.59	0.476431
2024-05-20 09:30:00	2115.6	20.3	0.169434	2065.9	19.5	0.0395367	2441.2	19.12	0.476431
2024-05-20 10:00:00	2102.8	21.35	0.169044	2055.7	20.17	0.0384592	2432.7	19.65	0.479733
2024-05-20 10:30:00	2091	21.95	0.167109	2054.3	20.8	0.0390841	2423.6	20.18	0.481948
2024-05-20 11:00:00	2109.9	21.71	0.172187	2168	20.59	0.05236	2528.4	20.32	0.483059
2024-05-20 11:30:00	2132.8	21.72	0.187932	2195.4	20.92	0.0540754	2557.2	20.27	0.456037
2024-05-20 12:00:00	2138.6	22.2	0.198609	2196.6	21.39	0.0539511	2552.5	20.64	0.454988
2024-05-20 12:30:00	2139.2	22.42	0.199986	2190.9	21.77	0.0530884	2547.2	20.97	0.454988
2024-05-20 13:00:00	2136.3	22.58	0.199067	2180.3	22.09	0.05188	2541.9	21.25	0.453942
2024-05-20 13:30:00	2131.5	22.6	0.196789	2167.1	22.33	0.0503501	2536.8	21.49	0.454988
2024-05-20 14:00:00	2127.3	22.64	0.195434	2154	22.54	0.0487528	2531.4	21.68	0.453942
2024-05-20 14:30:00	2121.9	22.7	0.193197	2140.5	22.75	0.0467735	2526.5	21.87	0.457088
2024-05-20 15:00:00	2118.1	22.72	0.190985	2128.6	22.88	0.0452898	2521.8	22.03	0.459198
2024-05-20 15:30:00	2115.3	22.53	0.190546	2118.3	22.99	0.0442588	2517.2	22.1	0.460257
2024-05-20 16:00:00	2112.4	22.38	0.188365	2108.4	23	0.0430527	2513.2	22.1	0.461318
2024-05-20 16:30:00	2110.3	22.28	0.186209	2099.5	23.01	0.0421697	2509.5	22.11	0.459198
2024-05-20 17:00:00	2108.3	22.14	0.188799	2090.8	23.1	0.0412098	2505.4	22.2	0.461318
2024-05-20 17:30:00	2106.4	22	0.187932	2083.6	23.14	0.040738	2501.6	22.2	0.464515
2024-05-20 18:00:00	2104.9	21.83	0.187499	2078.1	23.17	0.0401791	2498.1	22.19	0.465586
2024-05-20 18:30:00	2103.3	21.32	0.186209	2073.8	22.96	0.0399025	2494.7	22.01	0.465586
2024-05-20 19:00:00	2102.1	20.82	0.186209	2070	22.66	0.039355	2492	21.78	0.464515
2024-05-20 19:30:00	2100.9	20.38	0.185353	2067	22.31	0.0389942	2489.7	21.52	0.466659
2024-05-20 20:00:00	2100	20.15	0.18578	2064.4	22.03	0.0389045	2488.2	21.32	0.466659
2024-05-20 21:00:00	2098.7	19.98	0.18578	2061.3	21.59	0.0387258	2485.8	21	0.464515
2024-05-20 21:30:00	2098.6	19.63	0.187068	2059.8	21.16	0.0386367	2484.9	20.7	0.463447
2024-05-20 22:00:00	2098.7	19.26	0.185353	2058.9	20.72	0.0387258	2485	20.39	0.463447
2024-05-20 22:30:00	2098.8	18.86	0.186638	2058.1	20.27	0.0384592	2484.9	20.07	0.461318
2024-05-20 23:00:00	2098.7	18.49	0.187068	2057.5	19.85	0.0381944	2485.1	19.74	0.462381
2024-05-20 23:30:00	2098.5	18.38	0.186638	2056.8	19.53	0.0380189	2485.2	19.5	0.459198
2024-05-21	2098.3	18.18	0.187499	2056	19.29	0.0380189	2485.3	19.29	0.459198
2024-05-21 00:30:00	2097.9	18.09	0.187932	2054.9	19.04	0.0379315	2485.3	19.07	0.457088
2024-05-21 01:00:00	2097.4	18	0.188365	2054.3	18.84	0.0376704	2485.4	18.89	0.459198
2024-05-21 01:30:00	2096.8	17.94	0.188799	2053.7	18.67	0.0375837	2485.3	18.73	0.457088
2024-05-21 02:00:00	2096.2	17.9	0.188799	2053.4	18.52	0.0372392	2485	18.57	0.457088
2024-05-21 02:30:00	2095.7	17.77	0.189234	2052.3	18.37	0.0372392	2484.8	18.43	0.456037
2024-05-21 03:00:00	2094.9	17.77	0.188799	2051.7	18.27	0.0369828	2484.5	18.32	0.456037
2024-05-21 03:30:00	2094.2	17.79	0.189234	2050.8	18.15	0.0369828	2484.1	18.19	0.454988
2024-05-21 04:00:00	2093.3	17.75	0.189671	2049.7	18.05	0.0370681	2483.7	18.1	0.454988
2024-05-21 04:30:00	2092.5	17.73	0.189671	2048.5	17.97	0.0369828	2483.2	18	0.454988
2024-05-21 05:00:00	2091.6	17.72	0.189234	2047.7	17.9	0.0369828	2482.8	17.9	0.453942
2024-05-21 05:30:00	2090.7	17.68	0.189234	2046.9	17.82	0.0368978	2482	17.81	0.452898
2024-05-21 06:00:00	2089.5	17.62	0.189671	2045.8	17.8	0.0368129	2481.3	17.73	0.450817
2024-05-21 06:30:00	2088.1	17.63	0.189234	2044.5	17.71	0.0368129	2480.5	17.7	0.450817
2024-05-21 07:00:00	2085.9	17.83	0.188799	2042.7	17.81	0.0363078	2478.6	17.73	0.44978
2024-05-21 07:30:00	2083.5	18.07	0.187499	2040.2	18.01	0.036141	2475.3	17.87	0.448745
2024-05-21 08:00:00	2080.3	18.42	0.187068	2037.3	18.3	0.0359749	2471.5	18.1	0.451856
2024-05-21 08:30:00	2075.1	18.86	0.184927	2033.5	18.64	0.0358922	2467.1	18.36	0.451856
2024-05-21 09:00:00	2068.4	19.56	0.183654	2029.5	19.1	0.0353183	2460.7	18.79	0.452898
2024-05-21 09:30:00	2162.3	19.73	0.213304	2055.6	19.23	0.0386367	2526.4	19.05	0.444631
2024-05-21 10:00:00	2254.5	20.12	0.258821	2094.2	19.37	0.0419759	2542.5	19.34	0.42658
2024-05-21 10:30:00	2257.7	21.26	0.244906	2103.3	20.02	0.042658	2536.6	19.93	0.427563
2024-05-21 11:00:00	2250.9	21.96	0.230675	2103.6	20.63	0.0421697	2530.2	20.44	0.429536
2024-05-21 11:30:00	2240.6	22.45	0.218776	2098.8	21.16	0.0418794	2523.7	20.88	0.430527
2024-05-21 12:00:00	2229.5	22.81	0.211349	2092.3	21.62	0.0412098	2517.2	21.26	0.432514
2024-05-21 12:30:00	2219	23.04	0.204644	2084.6	22.02	0.0402717	2511.2	21.58	0.436516
2024-05-21 13:00:00	2209.5	23.18	0.199067	2077.8	22.31	0.039355	2505.8	21.82	0.437522
2024-05-21 13:30:00	2203	23.26	0.194984	2072.4	22.57	0.038815	2501	22.02	0.437522
2024-05-21 14:00:00	2194.9	23.4	0.191426	2066.5	22.8	0.0382825	2496.2	22.21	0.439542
2024-05-21 14:30:00	2189.6	23.33	0.187932	2061.4	22.93	0.0380189	2492.3	22.3	0.439542
2024-05-21 15:00:00	2185.6	23.2	0.183654	2057.3	23	0.0378443	2488.9	22.34	0.442588
2024-05-21 15:30:00	2181.8	23.21	0.18197	2053.4	23.04	0.0372392	2485.8	22.43	0.440555
2024-05-21 16:00:00	2176.6	23.32	0.178238	2049.8	23.16	0.0369828	2482.3	22.55	0.442588
2024-05-21 16:30:00	2171.4	23.46	0.177011	2046.8	23.3	0.0369828	2478.7	22.7	0.442588
2024-05-21 17:00:00	2166.8	23.5	0.174181	2044.2	23.4	0.0369828	2475.1	22.81	0.444631
2024-05-21 17:30:00	2163.4	23.5	0.172982	2042	23.48	0.0368129	2472.1	22.9	0.446684
2024-05-21 18:00:00	2160.2	23.13	0.172187	2040.5	23.34	0.0365595	2469.3	22.77	0.446684
2024-05-21 18:30:00	2159	22.19	0.170216	2039.1	22.97	0.0366438	2467.3	22.46	0.446684
2024-05-21 19:00:00	2157.5	21.62	0.169824	2037.6	22.58	0.0365595	2465.8	22.2	0.447713
2024-05-21 19:30:00	2156.4	21.24	0.168267	2036.8	22.3	0.0363915	2464.6	21.99	0.445656
2024-05-21 20:00:00	2154.7	20.95	0.167109	2035.8	22.09	0.0360579	2463.4	21.8	0.446684
2024-05-21 20:30:00	2153	20.86	0.166341	2034.8	21.92	0.0359749	2462.2	21.66	0.445656
2024-05-21 21:00:00	2151.9	20.62	0.165196	2034.3	21.7	0.0359749	2461.1	21.46	0.446684
2024-05-21 21:30:00	2151	20.2	0.163682	2033.7	21.32	0.0359749	2460.9	21.14	0.446684
2024-05-21 22:00:00	2150.6	19.75	0.163682	2033.4	20.88	0.0358096	2460.6	20.8	0.446684
2024-05-21 22:30:00	2149.3	19.34	0.162181	2032.6	20.44	0.0357273	2460.7	20.46	0.445656
2024-05-21 23:00:00	2149	18.98	0.161808	2032.4	20.05	0.0356451	2460.9	20.15	0.445656
2024-05-21 23:30:00	2148.3	18.65	0.161065	2032.3	19.66	0.0353183	2461.1	19.84	0.445656
2024-05-22	2147.2	18.5	0.159588	2031.6	19.37	0.0350752	2461.5	19.57	0.443609
2024-05-22 00:30:00	2146.4	18.38	0.160325	2031.1	19.17	0.0352371	2461.3	19.39	0.443609
2024-05-22 01:00:00	2145.5	18.2	0.160694	2031	18.94	0.0350752	2461.5	19.18	0.443609
2024-05-22 01:30:00	2144.6	18.16	0.160325	2030.8	18.79	0.0349945	2460.8	19.03	0.44157
2024-05-22 02:00:00	2143.5	18.06	0.159588	2030.5	18.62	0.0349945	2460.9	18.85	0.44157
2024-05-22 02:30:00	2142.4	18.07	0.159221	2030.1	18.54	0.0349945	2460.7	18.76	0.437522
2024-05-22 03:00:00	2141.4	18	0.158855	2029.7	18.41	0.0349945	2460.2	18.62	0.440555
2024-05-22 03:30:00	2140.4	17.9	0.158855	2029.2	18.32	0.0349945	2459.9	18.48	0.44157
2024-05-22 04:00:00	2139.2	17.87	0.158855	2028.8	18.23	0.0349945	2459.2	18.38	0.440555
2024-05-22 04:30:00	2138	17.8	0.158855	2028.2	18.13	0.0349945	2458.7	18.3	0.439542
2024-05-22 05:00:00	2136.9	17.8	0.157761	2027.6	18.1	0.0349945	2458.4	18.2	0.440555
2024-05-22 05:30:00	2135.5	17.84	0.157036	2027	18.05	0.0349945	2457.4	18.14	0.440555
2024-05-22 06:00:00	2134.1	17.8	0.156315	2026.7	18	0.0349945	2457.2	18.1	0.439542
2024-05-22 06:30:00	2132.4	17.79	0.154882	2026.2	17.94	0.0349945	2455.7	18.01	0.437522
2024-05-22 07:00:00	2129.7	18.03	0.154882	2025.5	18.04	0.0345939	2454.4	18.08	0.438531
2024-05-22 07:30:00	2126.2	18.36	0.154525	2024.3	18.29	0.0346737	2451.5	18.27	0.438531
2024-05-22 08:00:00	2121.3	18.7	0.15417	2022.4	18.57	0.0342768	2447.4	18.46	0.440555
2024-05-22 08:30:00	2117	18.92	0.153462	2021	18.82	0.0345939	2443.7	18.63	0.439542
2024-05-22 09:00:00	2111.7	19.21	0.151705	2019.4	19.05	0.0340408	2439.4	18.81	0.44157
2024-05-22 09:30:00	2101.7	20.3	0.150661	2017.5	19.49	0.033266	2432.8	19.24	0.442588
2024-05-22 10:00:00	2091.4	21.33	0.149279	2014.5	20.05	0.0323594	2424.8	19.73	0.444631
2024-05-22 10:30:00	2084.1	21.62	0.147231	2012.5	20.49	0.031989	2418.5	20.08	0.445656
2024-05-22 11:00:00	2076.4	21.97	0.145211	2011.2	20.91	0.03155	2411.6	20.44	0.447713
2024-05-22 11:30:00	2071.5	21.92	0.144877	2009.8	21.18	0.0313329	2406.6	20.64	0.450817
2024-05-22 12:00:00	2065.8	22.05	0.142889	2008.7	21.44	0.0309742	2401.8	20.85	0.452898
2024-05-22 12:30:00	2090.2	22.34	0.143549	2010.3	21.76	0.0310456	2423.1	21.16	0.469894
2024-05-22 13:00:00	2639.5	19.79	0.187499	2089.8	21.04	0.040738	2587.1	20.53	0.479733
2024-05-22 13:30:00	2598	20.44	0.128529	2132.6	21.07	0.0447713	2583	20.49	0.460257
2024-05-22 14:00:00	2572.9	21.11	0.114815	2148.8	21.37	0.0464515	2579.6	20.82	0.453942
2024-05-22 14:30:00	2554.1	21.6	0.108143	2155.7	21.66	0.0470977	2576.1	21.12	0.456037
2024-05-22 15:00:00	2538	21.93	0.104472	2158	21.9	0.0477529	2572.2	21.35	0.456037
2024-05-22 15:30:00	2524.6	22.2	0.101859	2158.7	22.1	0.0479733	2569	21.55	0.454988
2024-05-22 16:00:00	2513.5	22.28	0.100231	2158.6	22.2	0.0481948	2564.9	21.62	0.456037
2024-05-22 16:30:00	2505.4	22.2	0.0990832	2158.3	22.2	0.0489779	2562	21.7	0.458142
2024-05-22 17:00:00	2498.9	22.24	0.0981748	2157.5	22.27	0.0488652	2559.5	21.7	0.458142
2024-05-22 17:30:00	2493	22.22	0.0972747	2156.6	22.3	0.0489779	2556.4	21.7	0.458142
2024-05-22 18:00:00	2488.4	22.15	0.0968278	2156	22.24	0.0488652	2554.1	21.7	0.458142
2024-05-22 18:30:00	2485.4	21.82	0.0961612	2155.1	22.15	0.0484172	2552.5	21.63	0.458142
2024-05-22 19:00:00	2482.9	21.47	0.0957194	2154.5	21.97	0.0480839	2550.4	21.46	0.459198
2024-05-22 19:30:00	2480.5	21.3	0.0959401	2153.9	21.83	0.0479733	2549.2	21.34	0.457088
2024-05-22 20:00:00	2477.8	21.13	0.0957194	2153.1	21.67	0.0479733	2547.3	21.22	0.459198
2024-05-22 20:30:00	2475.6	20.92	0.0952796	2152.4	21.53	0.0477529	2546.1	21.06	0.457088
2024-05-22 21:00:00	2473.9	20.53	0.0952796	2152.1	21.27	0.0475335	2545	20.83	0.456037
2024-05-22 21:30:00	2473.6	20.08	0.0950605	2152	20.91	0.0474242	2544.9	20.55	0.457088
2024-05-22 22:00:00	2472.9	19.64	0.0950605	2151.9	20.52	0.0473151	2544.9	20.28	0.456037
2024-05-22 22:30:00	2472.7	19.27	0.094189	2151.9	20.16	0.0475335	2544.9	20.01	0.453942
2024-05-22 23:00:00	2471.6	18.92	0.0939723	2151.8	19.8	0.0474242	2544.9	19.72	0.453942
2024-05-22 23:30:00	2471.2	18.78	0.0939723	2151.6	19.51	0.0472063	2544.9	19.51	0.451856
2024-05-23	2469.9	18.58	0.0935406	2151.2	19.3	0.0469894	2545	19.33	0.452898
2024-05-23 00:30:00	2469.3	18.4	0.0939723	2150.9	19.08	0.0469894	2545	19.14	0.451856
2024-05-23 01:00:00	2468.4	18.32	0.0939723	2150.4	18.9	0.0469894	2544.7	18.97	0.450817
2024-05-23 01:30:00	2466.7	18.25	0.0939723	2150.1	18.74	0.0468813	2544.7	18.81	0.450817
2024-05-23 02:00:00	2465.8	18.05	0.0933254	2149.7	18.57	0.0465586	2544.4	18.65	0.44978
2024-05-23 02:30:00	2464.7	18.06	0.0931108	2149.2	18.45	0.0462381	2544	18.53	0.448745
2024-05-23 03:00:00	2463.2	17.94	0.0928966	2148.6	18.34	0.0460257	2543.8	18.41	0.447713
2024-05-23 03:30:00	2462	18	0.0928966	2147.9	18.29	0.0460257	2543.5	18.33	0.445656
2024-05-23 04:00:00	2460.7	17.93	0.092683	2147.3	18.2	0.0460257	2542.9	18.24	0.443609
2024-05-23 04:30:00	2459.4	17.96	0.0922571	2146.3	18.15	0.0460257	2542.6	18.19	0.444631
2024-05-23 05:00:00	2457.8	17.86	0.0922571	2145.3	18.1	0.0460257	2542.4	18.1	0.445656
2024-05-23 05:30:00	2456.4	17.86	0.092045	2144.6	18.07	0.0458142	2541.7	18.06	0.444631
2024-05-23 06:00:00	2454.9	17.8	0.092045	2143.4	18	0.0454988	2541.3	18	0.442588
2024-05-23 06:30:00	2453.4	17.77	0.0918333	2142.1	17.97	0.0451856	2540.5	17.92	0.442588
2024-05-23 07:00:00	2450.1	17.99	0.0914113	2139.8	18.03	0.0450817	2539	17.98	0.44157
2024-05-23 07:30:00	2445	18.43	0.0909913	2135.6	18.31	0.0445656	2536.1	18.21	0.440555
2024-05-23 08:00:00	2437.5	18.8	0.0907821	2129.8	18.63	0.0440555	2532.3	18.45	0.44157
2024-05-23 08:30:00	2425.5	19.27	0.0901571	2123	18.99	0.043451	2527.7	18.76	0.439542
2024-05-23 09:00:00	2409.9	19.93	0.0899498	2115.2	19.4	0.042462	2522.4	19.16	0.442588
2024-05-23 09:30:00	2389.8	21.05	0.0891251	2104.7	19.98	0.0412098	2515.5	19.69	0.442588
2024-05-23 10:00:00	2369.1	21.82	0.0889201	2092.9	20.56	0.0402717	2507.5	20.18	0.443609
2024-05-23 10:30:00	2355	22.09	0.0889201	2083.3	20.97	0.039355	2501.1	20.51	0.442588
2024-05-23 11:00:00	2360	22.24	0.0907821	2076.5	21.31	0.0389045	2498.7	20.81	0.447713
2024-05-23 11:30:00	2483.4	21.96	0.115611	2091.1	21.41	0.0430527	2559	20.87	0.446684
2024-05-23 12:00:00	2460.4	22.26	0.119124	2104.1	21.65	0.0479733	2554.4	21.09	0.44157
2024-05-23 12:30:00	2440	22.69	0.12106	2104.7	22.03	0.0521195	2549.5	21.46	0.440555
2024-05-23 13:00:00	2421.8	23.02	0.122744	2101	22.35	0.0554626	2544.4	21.78	0.440555
2024-05-23 13:30:00	2405.6	23.16	0.122744	2095.8	22.6	0.0576766	2538.9	22.02	0.442588
2024-05-23 14:00:00	2391.3	23.29	0.122744	2090.7	22.82	0.0590201	2533.5	22.22	0.440555
2024-05-23 14:30:00	2376.8	23.31	0.12218	2083.8	23.04	0.0592925	2528.6	22.39	0.440555
2024-05-23 15:00:00	2366.1	23.39	0.120504	2078.9	23.18	0.0591562	2523.9	22.53	0.443609
2024-05-23 15:30:00	2356.9	23.24	0.120226	2074.6	23.25	0.0587489	2519.4	22.6	0.444631
2024-05-23 16:00:00	2348.6	23.16	0.119674	2071	23.3	0.0579429	2515.8	22.6	0.443609
2024-05-23 16:30:00	2341.6	23.01	0.118304	2067	23.32	0.0571479	2511.9	22.62	0.444631
2024-05-23 17:00:00	2337	22.88	0.11749	2063	23.4	0.0564937	2507.6	22.7	0.444631
2024-05-23 17:30:00	2332.1	22.56	0.11508	2058.4	23.4	0.0555904	2502.9	22.65	0.444631
2024-05-23 18:00:00	2328.2	22.03	0.114815	2053.9	23.34	0.0548277	2498.5	22.52	0.444631
2024-05-23 18:30:00	2324.2	21.36	0.113501	2050.6	23.05	0.053827	2495.2	22.24	0.442588
2024-05-23 19:00:00	2320.9	20.8	0.111429	2048.3	22.64	0.0530884	2492.3	21.92	0.44157
2024-05-23 19:30:00	2317.2	20.43	0.111173	2046.5	22.28	0.052723	2490.5	21.64	0.442588
2024-05-23 20:00:00	2314.4	20.23	0.110154	2044.9	22	0.0521195	2488.7	21.42	0.44157
2024-05-23 20:30:00	2312.1	20.1	0.109648	2043.9	21.78	0.0517607	2486.8	21.24	0.440555
2024-05-23 21:00:00	2310.3	19.99	0.109396	2043.3	21.55	0.0514044	2485.9	21.06	0.439542
2024-05-23 21:30:00	2309.9	19.78	0.108893	2042.6	21.25	0.0511682	2485.1	20.82	0.437522
2024-05-23 22:00:00	2309.6	19.49	0.108143	2042.6	20.88	0.0510505	2484.9	20.55	0.438531
2024-05-23 22:30:00	2308.9	19.16	0.107895	2042.5	20.47	0.0510505	2484.9	20.24	0.437522
2024-05-23 23:00:00	2309.1	18.83	0.107895	2041.8	20.05	0.0508159	2484.7	19.92	0.437522
2024-05-23 23:30:00	2308.3	18.6	0.107399	2041.9	19.66	0.0500035	2485.2	19.62	0.435512
2024-05-24	2307	18.52	0.107152	2041.5	19.42	0.0497737	2485.2	19.43	0.432514
2024-05-24 00:30:00	2306.6	18.32	0.106905	2040.9	19.18	0.049545	2485	19.22	0.433511
2024-05-24 01:00:00	2305.2	18.28	0.10666	2040.7	19	0.049204	2485.1	19.05	0.431519
2024-05-24 01:30:00	2304.1	18.18	0.106414	2040.4	18.82	0.0489779	2484.7	18.87	0.430527
2024-05-24 02:00:00	2303.2	18.17	0.105925	2040.6	18.68	0.0489779	2484.6	18.77	0.431519
2024-05-24 02:30:00	2301.4	18.03	0.105925	2040.2	18.54	0.0489779	2484.2	18.62	0.430527
2024-05-24 03:00:00	2300.5	18.02	0.105682	2039.7	18.43	0.0489779	2483.8	18.5	0.429536
2024-05-24 03:30:00	2298.5	17.95	0.104954	2038.9	18.32	0.0487528	2483.2	18.39	0.427563
2024-05-24 04:00:00	2297.4	17.93	0.104954	2038.7	18.26	0.0484172	2482.7	18.3	0.42658
2024-05-24 04:30:00	2295.9	17.96	0.104954	2038.5	18.2	0.0479733	2482.3	18.22	0.427563
2024-05-24 05:00:00	2294.9	17.94	0.104713	2038	18.17	0.0480839	2481.3	18.2	0.428549
2024-05-24 05:30:00	2293.2	17.95	0.104232	2037.5	18.1	0.0477529	2480.9	18.11	0.425598
2024-05-24 06:00:00	2291.8	17.88	0.103753	2036.5	18.1	0.0475335	2480.2	18.08	0.42462
2024-05-24 06:30:00	2289.9	17.87	0.103514	2035.6	18.04	0.0470977	2479.3	18	0.42462
2024-05-24 07:00:00	2287.7	17.85	0.103514	2034.9	18.03	0.0468813	2477.6	18	0.422669
2024-05-24 07:30:00	2283.8	18.07	0.103039	2033.2	18.19	0.0467735	2474.7	18.12	0.421697
2024-05-24 08:00:00	2279	18.33	0.102802	2031.3	18.41	0.0461318	2471.3	18.27	0.420727
2024-05-24 08:30:00	2273.1	18.67	0.102329	2028.8	18.68	0.0460257	2467.7	18.46	0.419759
2024-05-24 09:00:00	2260.5	19.27	0.101625	2026.2	19.04	0.0451856	2463	18.78	0.419759
2024-05-24 09:30:00	2248	19.94	0.100925	2024.1	19.51	0.0444631	2457.2	19.19	0.418794
2024-05-24 10:00:00	2236.7	20.59	0.100693	2021.1	20.05	0.0437522	2451.9	19.63	0.420727
2024-05-24 10:30:00	2220.5	21.34	0.09977	2018.2	20.63	0.0428549	2445.3	20.15	0.419759
2024-05-24 11:00:00	2201.9	22.01	0.0988553	2014.8	21.16	0.0418794	2437.4	20.65	0.419759
2024-05-24 11:30:00	2184.7	22.46	0.097499	2012.1	21.66	0.0403645	2428.4	21.09	0.421697
2024-05-24 12:00:00	2168.3	22.71	0.0961612	2010	22.06	0.0392645	2420.1	21.45	0.421697
2024-05-24 12:30:00	2154.5	23.04	0.0952796	2008.1	22.4	0.0387258	2412.7	21.77	0.422669
2024-05-24 13:00:00	2141.8	23.2	0.0944061	2006.3	22.7	0.0380189	2404.2	22.05	0.42462
2024-05-24 13:30:00	2328.1	22.59	0.177011	2047.9	22.48	0.0594292	2483	22.03	0.458142
2024-05-24 14:00:00	2430.7	22.26	0.212814	2108.9	22.22	0.0874984	2490.9	22.02	0.440555
2024-05-24 14:30:00	2415.8	22.56	0.202768	2127	22.44	0.0939723	2484.8	22.24	0.437522
2024-05-24 15:00:00	2402.5	22.71	0.197242	2134.6	22.7	0.097949	2479.1	22.4	0.438531
2024-05-24 15:30:00	2390.3	22.87	0.192309	2138.7	22.92	0.0993116	2474	22.54	0.435512
2024-05-24 16:00:00	2379.4	22.95	0.187499	2140.3	23.08	0.101859	2469	22.63	0.436516
2024-05-24 16:30:00	2370.4	23	0.184502	2140.7	23.23	0.102329	2463.6	22.73	0.435512
2024-05-24 17:00:00	2362.3	23	0.180717	2140.2	23.36	0.103753	2459.1	22.8	0.435512
2024-05-24 17:30:00	2355.8	23	0.179061	2139.5	23.45	0.103753	2454.7	22.87	0.43451
2024-05-24 18:00:00	2351.2	22.71	0.175792	2139.1	23.44	0.104232	2451	22.78	0.43451
2024-05-24 18:30:00	2348.3	21.92	0.17378	2138.7	23.17	0.104472	2447.8	22.46	0.435512
2024-05-24 19:00:00	2346.7	21.31	0.171791	2138.4	22.82	0.103753	2446.1	22.16	0.43451
2024-05-24 19:30:00	2345	20.94	0.170608	2138.1	22.52	0.103753	2444.7	21.92	0.432514
2024-05-24 20:00:00	2342.7	20.8	0.168655	2137.7	22.32	0.102802	2443.1	21.75	0.430527
2024-05-24 20:30:00	2341.1	20.8	0.167494	2137.1	22.18	0.102565	2441.4	21.65	0.430527
2024-05-24 21:00:00	2339.2	20.6	0.165959	2136.8	22	0.100925	2439.8	21.47	0.430527
2024-05-24 21:30:00	2338.2	20.24	0.164059	2136.7	21.65	0.101859	2439.5	21.16	0.430527
2024-05-24 22:00:00	2338.1	19.87	0.16293	2136.7	21.24	0.101859	2439.3	20.86	0.428549
2024-05-24 22:30:00	2337.2	19.51	0.161808	2136.9	20.82	0.101158	2439	20.55	0.428549
2024-05-24 23:00:00	2337	19.19	0.160694	2137	20.43	0.100462	2439.2	20.24	0.425598
2024-05-24 23:30:00	2336.2	18.89	0.158855	2137	20.06	0.09977	2439.1	19.94	0.425598
2024-05-25	2336	18.61	0.159221	2136.8	19.72	0.0988553	2439.4	19.67	0.42462
2024-05-25 00:30:00	2335	18.5	0.158855	2136.5	19.45	0.0984011	2439.4	19.44	0.423643
2024-05-25 01:00:00	2333.9	18.36	0.158125	2136.1	19.25	0.0984011	2439	19.23	0.423643
2024-05-25 01:30:00	2332.4	18.23	0.157398	2135.5	19.03	0.097949	2439.2	19	0.420727
2024-05-25 02:00:00	2331	18.1	0.154882	2135.2	18.84	0.097499	2439.1	18.79	0.422669
2024-05-25 02:30:00	2329.8	18.04	0.155239	2134.6	18.67	0.097051	2439	18.63	0.420727
2024-05-25 03:00:00	2328.4	17.96	0.154882	2134.1	18.53	0.0963829	2438.7	18.5	0.419759
2024-05-25 03:30:00	2327.1	17.93	0.153462	2133.7	18.43	0.0957194	2438	18.4	0.418794
2024-05-25 04:00:00	2325.4	17.9	0.152757	2133	18.35	0.0948418	2437.5	18.3	0.418794
2024-05-25 04:30:00	2323.9	17.9	0.152055	2132.3	18.3	0.094189	2437.1	18.24	0.41783
2024-05-25 05:00:00	2322.1	17.92	0.151356	2131.4	18.2	0.094189	2436.3	18.19	0.41783
2024-05-25 05:30:00	2320.8	17.9	0.151008	2130.5	18.17	0.0937562	2435.5	18.1	0.41783
2024-05-25 06:00:00	2318.9	17.83	0.149968	2129.6	18.1	0.0928966	2434.7	18.04	0.414
2024-05-25 06:30:00	2316.4	17.83	0.149624	2128.4	18.07	0.0922571	2433.8	17.97	0.415911
2024-05-25 07:00:00	2312.8	18	0.148594	2126.6	18.09	0.0918333	2431.2	18	0.414954
2024-05-25 07:30:00	2308.5	18.24	0.147571	2124	18.27	0.0907821	2427.3	18.15	0.413048
2024-05-25 08:00:00	2303.4	18.49	0.146555	2120.5	18.48	0.0895365	2423.1	18.32	0.410204
2024-05-25 08:30:00	2294.5	18.88	0.144877	2116.5	18.74	0.0872971	2418.1	18.53	0.410204
2024-05-25 09:00:00	2278.4	19.55	0.142889	2111.1	19.12	0.0855067	2411.6	18.92	0.41115
2024-05-25 09:30:00	2267.4	19.98	0.140281	2106.2	19.51	0.0827942	2405.5	19.27	0.41115
2024-05-25 10:00:00	2259	20.21	0.138357	2101.6	19.81	0.0824138	2400.6	19.48	0.413048
2024-05-25 10:30:00	2249.9	20.67	0.136458	2096.7	20.19	0.0809096	2395.4	19.78	0.414
2024-05-25 11:00:00	2236.4	21.28	0.134896	2090.6	20.66	0.078886	2388.6	20.21	0.416869
2024-05-25 11:30:00	2217.3	21.9	0.132739	2082.5	21.09	0.0763836	2380.6	20.65	0.41783
2024-05-25 12:00:00	2199.1	22.43	0.130317	2075.6	21.54	0.0734514	2372	21.08	0.418794
2024-05-25 12:30:00	2183.8	22.75	0.127938	2068.7	21.87	0.0717794	2364.4	21.41	0.422669
2024-05-25 13:00:00	2171.2	23.01	0.125314	2062.2	22.18	0.0696627	2358.6	21.7	0.425598
2024-05-25 13:30:00	2159.4	23.1	0.122462	2056	22.38	0.0672977	2351.4	21.9	0.427563
2024-05-25 14:00:00	2148.8	23.2	0.120226	2050.3	22.55	0.0653131	2344.7	22.07	0.430527
2024-05-25 14:30:00	2139.2	23.33	0.119399	2044.6	22.74	0.063387	2338.4	22.24	0.43451
2024-05-25 15:00:00	2128.1	23.48	0.11749	2038.7	22.93	0.0613762	2331.3	22.43	0.436516
2024-05-25 15:30:00	2119.1	23.62	0.115345	2032.7	23.14	0.0591562	2325.2	22.63	0.438531
2024-05-25 16:00:00	2111.5	23.5	0.11324	2027.8	23.29	0.0571479	2320.5	22.72	0.443609
2024-05-25 16:30:00	2105.5	23.36	0.11272	2023.5	23.38	0.0554626	2315.8	22.8	0.447713
2024-05-25 17:00:00	2100.2	23.33	0.111944	2019.8	23.41	0.053827	2311.9	22.82	0.450817
2024-05-25 17:30:00	2095.9	23.37	0.110917	2017	23.5	0.0526017	2308.1	22.9	0.453942
2024-05-25 18:00:00	2415.6	21.77	0.148936	2024.9	23.43	0.0540754	2478.1	22.19	0.571479
2024-05-25 18:30:00	2625.7	20.08	0.126474	2292.2	21.84	0.135519	2640.3	20.02	0.490908
2024-05-25 19:00:00	2608.1	20	0.115611	2321.8	21.04	0.125603	2623.6	19.96	0.462381
2024-05-25 19:30:00	2597.7	20.05	0.11324	2323.4	20.9	0.118304	2614.3	20.16	0.447713
2024-05-25 20:00:00	2591.2	20.15	0.11298	2323.2	20.9	0.114288	2608.6	20.34	0.439542
2024-05-25 20:30:00	2586.5	20.29	0.11272	2322.8	20.9	0.111429	2604.7	20.49	0.431519
2024-05-25 21:00:00	2583.8	20.15	0.11324	2322.4	20.86	0.110154	2601.6	20.46	0.427563
2024-05-25 21:30:00	2582.5	19.8	0.113501	2322.7	20.62	0.109901	2600.6	20.28	0.42462
2024-05-25 22:00:00	2581.4	19.41	0.115611	2322.6	20.32	0.108893	2599.7	20.05	0.418794
2024-05-25 22:30:00	2580.5	19.06	0.115878	2322.6	19.99	0.108143	2599.1	19.8	0.414954
2024-05-25 23:00:00	2579.5	18.9	0.116413	2322.9	19.73	0.107647	2598.3	19.6	0.412098
2024-05-25 23:30:00	2578.6	18.66	0.11695	2323.5	19.5	0.105682	2597.6	19.41	0.406443
2024-05-26	2577.5	18.53	0.11695	2323.8	19.3	0.10666	2596.7	19.23	0.400867
2024-05-26 00:30:00	2576.3	18.4	0.11695	2324	19.1	0.107399	2596.3	19.04	0.399025
2024-05-26 01:00:00	2575.1	18.26	0.11749	2324	18.94	0.107152	2595.6	18.88	0.395367
2024-05-26 01:30:00	2574.1	18.18	0.117761	2324.5	18.77	0.106905	2594.8	18.73	0.39355
2024-05-26 02:00:00	2572.9	18.04	0.11749	2324.7	18.63	0.106905	2594.2	18.56	0.389045
2024-05-26 02:30:00	2571.6	18.03	0.11722	2324.9	18.49	0.106905	2593.1	18.44	0.385478
2024-05-26 03:00:00	2570.4	17.98	0.11722	2325.3	18.39	0.106905	2592.4	18.31	0.381944
2024-05-26 03:30:00	2569.2	17.9	0.11722	2325.6	18.28	0.107152	2591.5	18.2	0.379315
2024-05-26 04:00:00	2568	17.82	0.11695	2326.2	18.17	0.107152	2590.6	18.09	0.375837
2024-05-26 04:30:00	2566.9	17.8	0.11695	2325.7	18.1	0.107152	2589.8	17.98	0.372392
2024-05-26 05:00:00	2565.6	17.76	0.11695	2326.1	18	0.107152	2588.9	17.9	0.369828
2024-05-26 05:30:00	2564.3	17.64	0.116681	2325.9	17.94	0.106905	2588.2	17.81	0.368129
2024-05-26 06:00:00	2562.5	17.62	0.116145	2325.9	17.9	0.10666	2587.1	17.73	0.363078
2024-05-26 06:30:00	2561	17.69	0.116145	2325.2	17.84	0.106414	2586.1	17.7	0.362243
2024-05-26 07:00:00	2558.1	17.8	0.115611	2325.3	17.87	0.105925	2583.7	17.71	0.358096
2024-05-26 07:30:00	2554.6	18.02	0.11508	2324.5	18.04	0.105196	2579.7	17.83	0.353997
2024-05-26 08:00:00	2549.2	18.34	0.114551	2322.5	18.28	0.104713	2575.1	18	0.345939
2024-05-26 08:30:00	2539.8	18.81	0.114025	2319.7	18.57	0.103992	2569.3	18.28	0.341193
2024-05-26 09:00:00	2527.3	19.45	0.114025	2316.8	18.94	0.103753	2562.9	18.66	0.333426
2024-05-26 09:30:00	2512.7	20.33	0.113501	2314.1	19.37	0.103276	2555.4	19.13	0.326588
2024-05-26 10:00:00	2496.3	21.23	0.113763	2309.5	19.86	0.102329	2547.8	19.64	0.31989
2024-05-26 10:30:00	2481.4	21.77	0.114025	2304	20.35	0.101625	2540.7	20.11	0.312608
2024-05-26 11:00:00	2463.7	22.19	0.113763	2298.1	20.81	0.100925	2533.8	20.5	0.306902
2024-05-26 11:30:00	2444.1	22.81	0.113501	2293.8	21.23	0.100462	2536.1	20.89	0.303389
2024-05-26 12:00:00	2428.8	23.23	0.111429	2292.9	21.65	0.1	2559	21.24	0.301301
2024-05-26 12:30:00	2413.7	23.3	0.112202	2287.1	22.02	0.0990832	2552.2	21.52	0.299226
2024-05-26 13:00:00	2399.1	23.37	0.111686	2279.6	22.35	0.0981748	2545	21.79	0.293089
2024-05-26 13:30:00	2385.5	23.34	0.110917	2272.8	22.67	0.0972747	2537.5	22.03	0.288403
2024-05-26 14:00:00	2373.3	23.3	0.109648	2265.7	22.94	0.0966051	2530.6	22.24	0.283792
2024-05-26 14:30:00	2361.7	23.2	0.109648	2258.5	23.16	0.0959401	2523.2	22.37	0.279898
2024-05-26 15:00:00	2352.3	23.02	0.109901	2252.3	23.28	0.0952796	2516.8	22.47	0.275423
2024-05-26 15:30:00	2411.9	22.75	0.11722	2251.8	23.38	0.0952796	2511.7	22.5	0.27227
2024-05-26 16:00:00	2482	22.34	0.117761	2280	23.31	0.097051	2506.9	22.52	0.268534
2024-05-26 16:30:00	2473.4	22.32	0.111173	2279	23.35	0.0961612	2502.8	22.6	0.266073
2024-05-26 17:00:00	2465.5	22.3	0.10666	2275.7	23.41	0.0950605	2499.2	22.63	0.263027
2024-05-26 17:30:00	2460	22.27	0.104713	2272	23.5	0.0946237	2494.5	22.7	0.260615
2024-05-26 18:00:00	2454.9	21.9	0.102565	2267.3	23.46	0.0935406	2488.7	22.58	0.258226
2024-05-26 18:30:00	2450.5	21.4	0.101158	2264.1	23.27	0.092683	2483.5	22.4	0.253513
2024-05-26 19:00:00	2445.9	20.93	0.1	2261.2	22.98	0.091622	2479.8	22.19	0.251189
2024-05-26 19:30:00	2442.4	20.5	0.0993116	2258.8	22.65	0.0912011	2476.7	21.93	0.246604
2024-05-26 20:00:00	2439.7	20.24	0.0988553	2257.1	22.37	0.0912011	2473.8	21.71	0.244343
2024-05-26 20:30:00	2437.2	20.12	0.097949	2256.8	22.18	0.0909913	2471.7	21.54	0.240991
2024-05-26 21:00:00	2435.3	20.07	0.0972747	2256.4	22	0.0907821	2470.2	21.33	0.240991
2024-05-26 21:30:00	2433.7	19.81	0.097051	2255.9	21.68	0.0905733	2469.5	21.03	0.239883
2024-05-26 22:00:00	2433.1	19.53	0.0963829	2255.7	21.31	0.0901571	2469.4	20.75	0.238232
2024-05-26 22:30:00	2432.4	19.24	0.0959401	2256.1	20.93	0.0899498	2469.5	20.44	0.237137
2024-05-26 23:00:00	2431.8	18.9	0.0959401	2256.4	20.53	0.0897429	2469.4	20.12	0.235505
2024-05-26 23:30:00	2431.3	18.58	0.0952796	2256.9	20.14	0.0895365	2469.7	19.79	0.232809
2024-05-27	2429.7	18.48	0.0948418	2256.8	19.86	0.0893305	2469.8	19.57	0.233346
2024-05-27 00:30:00	2428.5	18.32	0.094189	2256.7	19.61	0.0891251	2469.7	19.39	0.231206
2024-05-27 01:00:00	2427.4	18.24	0.0937562	2257	19.39	0.0891251	2469.7	19.21	0.230675
2024-05-27 01:30:00	2426	18.09	0.0933254	2256.5	19.21	0.0889201	2469.6	19.05	0.229615
2024-05-27 02:00:00	2424.6	18	0.092683	2256.7	19.02	0.0887156	2469.3	18.87	0.228034
2024-05-27 02:30:00	2422.9	17.95	0.092683	2256	18.85	0.0887156	2469.1	18.74	0.229087
2024-05-27 03:00:00	2421.4	17.94	0.0924698	2255.7	18.74	0.0885116	2468.6	18.63	0.228034
2024-05-27 03:30:00	2419.2	17.9	0.092045	2255.6	18.6	0.088308	2468.4	18.51	0.226464
2024-05-27 04:00:00	2417.7	17.84	0.092045	2254.6	18.48	0.0877001	2468.2	18.41	0.225944
2024-05-27 04:30:00	2415.7	17.81	0.091622	2254.2	18.4	0.0874984	2467.4	18.33	0.225424
2024-05-27 05:00:00	2413.6	17.79	0.0909913	2253.4	18.31	0.0870964	2467	18.24	0.224905
2024-05-27 05:30:00	2411.6	17.78	0.0905733	2252.9	18.27	0.086896	2466.5	18.17	0.222331
2024-05-27 06:00:00	2409.3	17.77	0.0901571	2251.8	18.2	0.0866962	2465.6	18.1	0.22182
2024-05-27 06:30:00	2406.5	17.76	0.0897429	2250.9	18.11	0.0866962	2464.9	18.02	0.2208
2024-05-27 07:00:00	2403.1	17.86	0.0891251	2249.3	18.15	0.0860994	2462.4	18.08	0.218776
2024-05-27 07:30:00	2398.1	18.12	0.0889201	2246.2	18.31	0.0847227	2458.6	18.18	0.215278
2024-05-27 08:00:00	2388.2	18.54	0.0879023	2241.6	18.54	0.084918	2454.8	18.39	0.212814
2024-05-27 08:30:00	2371.6	19.18	0.0872971	2235.1	18.89	0.084918	2450.5	18.75	0.209894
2024-05-27 09:00:00	2352.9	19.83	0.0862979	2228.7	19.25	0.0845279	2446	19.12	0.20797
2024-05-27 09:30:00	2330.5	20.93	0.0855067	2221.7	19.73	0.0837529	2439.9	19.63	0.204644
2024-05-27 10:00:00	2304.9	21.84	0.0843335	2212	20.26	0.0827942	2433	20.16	0.201837
2024-05-27 10:30:00	2282.2	22.39	0.0835603	2201.3	20.76	0.0816582	2426.9	20.59	0.199067
2024-05-27 11:00:00	2260.8	22.67	0.0826038	2190.5	21.19	0.0805378	2425.6	20.96	0.195434
2024-05-27 11:30:00	2238.9	23.13	0.0818465	2180.6	21.58	0.0787046	2421.8	21.28	0.194089
2024-05-27 12:00:00	2217.9	23.56	0.0812831	2170.8	21.96	0.0781628	2418.4	21.6	0.192309
2024-05-27 12:30:00	2199.5	23.55	0.0801678	2160.4	22.29	0.076913	2414.4	21.88	0.190985
2024-05-27 13:00:00	2184.9	23.42	0.0797995	2151	22.61	0.0753356	2410.1	22.13	0.190546
2024-05-27 13:30:00	2173.6	23.27	0.0790679	2142.2	22.9	0.0736207	2406.4	22.34	0.189671
2024-05-27 14:00:00	2191.7	22.98	0.0803526	2158.9	23.03	0.0751623	2514.2	22.26	0.245471
2024-05-27 14:30:00	2233.1	22.62	0.0835603	2204.8	23	0.0847227	2519.2	22.2	0.251768
2024-05-27 15:00:00	2241.7	22.65	0.0866962	2217.4	23	0.0901571	2514	22.37	0.251189
2024-05-27 15:30:00	2242.5	22.56	0.0887156	2218.5	23	0.0928966	2508.8	22.5	0.251768
2024-05-27 16:00:00	2241.2	22.44	0.0899498	2218.3	23	0.0933254	2504.4	22.56	0.248313
2024-05-27 16:30:00	2240.1	22.32	0.0907821	2216.8	23	0.0937562	2500.6	22.6	0.247742
2024-05-27 17:00:00	2237.1	22.3	0.0909913	2213.4	23.08	0.0935406	2496.6	22.62	0.247172
2024-05-27 17:30:00	2233.4	22.24	0.0909913	2208.2	23.21	0.0928966	2489.9	22.72	0.243781
2024-05-27 18:00:00	2229	22.15	0.0907821	2202.5	23.3	0.0922571	2482.7	22.8	0.242661
2024-05-27 18:30:00	2224.6	21.94	0.0903649	2198.2	23.29	0.091622	2476.9	22.76	0.238781
2024-05-27 19:00:00	2220.5	21.62	0.0899498	2194.5	23.15	0.0912011	2471.1	22.64	0.235505
2024-05-27 19:30:00	2217	21.14	0.0895365	2192	22.88	0.0905733	2466.3	22.4	0.234423
2024-05-27 20:00:00	2214.4	20.63	0.0893305	2191	22.53	0.0905733	2462.3	22.11	0.232274
2024-05-27 20:30:00	2213.5	20.35	0.0897429	2189.7	22.25	0.0897429	2459.5	21.87	0.229087
2024-05-27 21:00:00	2212.1	20.33	0.0899498	2189.2	22.04	0.0895365	2457.6	21.65	0.228034
2024-05-27 21:30:00	2212	20.12	0.0899498	2189.1	21.77	0.0903649	2456.5	21.36	0.226464
2024-05-27 22:00:00	2212.2	19.86	0.0899498	2189.1	21.42	0.0903649	2456.2	21.05	0.225424
2024-05-27 22:30:00	2212.2	19.6	0.0899498	2189	21.07	0.0901571	2455.9	20.78	0.225424
2024-05-27 23:00:00	2211.9	19.34	0.0899498	2189.1	20.74	0.0899498	2455.8	20.5	0.223872
2024-05-27 23:30:00	2211.7	19.06	0.0897429	2189.2	20.4	0.0899498	2455.6	20.21	0.223357
2024-05-28	2211.7	18.77	0.0899498	2189	20.06	0.0897429	2455.4	19.91	0.221309
2024-05-28 00:30:00	2212.1	18.5	0.0897429	2189.1	19.73	0.0893305	2455.4	19.62	0.221309
2024-05-28 01:00:00	2211.1	18.33	0.0897429	2189.2	19.46	0.0893305	2455.3	19.38	0.2208
2024-05-28 01:30:00	2210.7	18.4	0.0897429	2188.9	19.29	0.0891251	2455.1	19.28	0.2208
2024-05-28 02:00:00	2209.7	18.24	0.0897429	2188.5	19.13	0.0885116	2454.7	19.1	0.218776
2024-05-28 02:30:00	2209.1	18.18	0.0899498	2188.1	18.96	0.0887156	2454.6	18.94	0.218776
2024-05-28 03:00:00	2208.1	18.17	0.0897429	2187.6	18.84	0.0885116	2454	18.84	0.21727
2024-05-28 03:30:00	2207.3	18.08	0.0895365	2187.1	18.74	0.088308	2453.6	18.72	0.218273
2024-05-28 04:00:00	2206.2	18.1	0.0895365	2186.5	18.64	0.088308	2453.2	18.66	0.217771
2024-05-28 04:30:00	2205.1	18	0.0897429	2186.1	18.54	0.0881049	2452.8	18.55	0.21727
2024-05-28 05:00:00	2203.8	18.04	0.0895365	2185.4	18.47	0.0881049	2452.2	18.48	0.215278
2024-05-28 05:30:00	2202.8	17.93	0.0899498	2184.8	18.37	0.0881049	2451.6	18.4	0.215278
2024-05-28 06:00:00	2201	17.96	0.0899498	2184.1	18.3	0.0879023	2450.8	18.31	0.214783
2024-05-28 06:30:00	2198.7	17.94	0.0899498	2183	18.23	0.0877001	2450	18.22	0.214289
2024-05-28 07:00:00	2195.8	18.1	0.0893305	2181.1	18.26	0.0872971	2446.5	18.29	0.211836
2024-05-28 07:30:00	2192	18.42	0.0891251	2178.1	18.42	0.0866962	2441.5	18.41	0.209411
2024-05-28 08:00:00	2185.5	18.8	0.0889201	2174.3	18.67	0.0859014	2435.5	18.6	0.206063
2024-05-28 08:30:00	2176.1	19.24	0.0881049	2169.7	18.94	0.0851138	2429.1	18.83	0.201837
2024-05-28 09:00:00	2167.5	19.64	0.0881049	2164.5	19.25	0.083946	2422.3	19.08	0.199986
2024-05-28 09:30:00	2159.2	20.02	0.0877001	2159.3	19.54	0.0829851	2416.1	19.33	0.196789
2024-05-28 10:00:00	2146.8	20.8	0.086896	2153.3	19.96	0.0818465	2408.8	19.74	0.194089
2024-05-28 10:30:00	2133.3	21.45	0.0860994	2145.4	20.43	0.0801678	2401.1	20.18	0.191867
2024-05-28 11:00:00	2119.9	21.96	0.084918	2137.8	20.85	0.0785236	2393.7	20.58	0.190546
2024-05-28 11:30:00	2121.1	21.94	0.0847227	2132.4	21.2	0.0772681	2384.3	20.93	0.188799
2024-05-28 12:00:00	2122.9	22.06	0.0845279	2126.9	21.5	0.0765597	2378	21.23	0.186638
2024-05-28 12:30:00	2122.7	22.32	0.0845279	2122.1	21.72	0.0756833	2373.2	21.43	0.185353
2024-05-28 13:00:00	2121.5	22.49	0.0841395	2117.9	21.94	0.0749894	2368	21.6	0.184502
2024-05-28 13:30:00	2120.5	22.5	0.0845279	2114.3	22.08	0.0746449	2363.2	21.7	0.184077
2024-05-28 14:00:00	2120.2	22.42	0.084918	2111.5	22.17	0.0739605	2359.7	21.77	0.183654
2024-05-28 14:30:00	2120.3	22.47	0.084918	2109	22.26	0.0732825	2357.2	21.87	0.18281
2024-05-28 15:00:00	2120.4	22.35	0.0855067	2107	22.3	0.0729458	2357	21.84	0.18239
2024-05-28 15:30:00	2120.4	22.3	0.0862979	2105.3	22.23	0.072778	2356.5	21.8	0.18239
2024-05-28 16:00:00	2119.7	22.3	0.086896	2103.4	22.27	0.0719449	2355.8	21.9	0.183231
2024-05-28 16:30:00	2118.9	22.32	0.0874984	2101.8	22.3	0.0712853	2354.9	21.9	0.184502
2024-05-28 17:00:00	2117.5	22.44	0.0879023	2099.8	22.32	0.0709578	2353.8	21.97	0.183654
2024-05-28 17:30:00	2115.3	22.5	0.0879023	2097.6	22.4	0.0707946	2351.3	22	0.184077
2024-05-28 18:00:00	2113.2	22.39	0.088308	2095.4	22.4	0.0704693	2349.5	21.99	0.183654
2024-05-28 18:30:00	2111	21.89	0.0887156	2093.8	22.24	0.0699842	2348.5	21.81	0.183654
2024-05-28 19:00:00	2110	21.62	0.0889201	2092.8	22.06	0.0696627	2347.8	21.64	0.18239
2024-05-28 19:30:00	2109.6	21.4	0.0897429	2091.9	21.89	0.0693426	2347.4	21.47	0.18281
2024-05-28 20:00:00	2109	21.12	0.0899498	2091.3	21.69	0.0693426	2346.4	21.29	0.183654
2024-05-28 20:30:00	2108.9	20.78	0.0905733	2091	21.45	0.0693426	2346.3	21.06	0.183231
2024-05-28 21:00:00	2109	20.38	0.0909913	2090.6	21.14	0.0691831	2346.2	20.78	0.18239
2024-05-28 21:30:00	2109.3	19.94	0.0912011	2090.5	20.78	0.069024	2346.1	20.46	0.183654
2024-05-28 22:00:00	2109.8	19.46	0.091622	2090.4	20.39	0.0688652	2346.3	20.1	0.184077
2024-05-28 22:30:00	2110.2	19.06	0.092045	2090.4	19.98	0.0683912	2346.7	19.72	0.18281
2024-05-28 23:00:00	2110.3	18.94	0.092045	2090.6	19.71	0.0682339	2347.3	19.52	0.183231
2024-05-28 23:30:00	2110.5	18.67	0.0928966	2090.3	19.47	0.0682339	2347.1	19.31	0.183654
2024-05-29	2110.4	18.54	0.0931108	2090.1	19.26	0.0680769	2347.2	19.14	0.18281
2024-05-29 00:30:00	2110.5	18.33	0.0937562	2089.6	19.06	0.0680769	2347.2	18.96	0.18239
2024-05-29 01:00:00	2110.2	18.29	0.0937562	2089.3	18.9	0.0677642	2346.9	18.82	0.183231
2024-05-29 01:30:00	2110	18.13	0.0939723	2089	18.74	0.0679204	2347	18.64	0.18239
2024-05-29 02:00:00	2109.6	18.14	0.0939723	2088.7	18.6	0.0677642	2346.3	18.57	0.180717
2024-05-29 02:30:00	2109.3	18.03	0.0946237	2088.5	18.49	0.0676083	2345.6	18.43	0.181552
2024-05-29 03:00:00	2108.7	17.99	0.0950605	2088.1	18.39	0.0677642	2345.8	18.35	0.18197
2024-05-29 03:30:00	2108	17.9	0.0950605	2087.8	18.28	0.0674528	2345.3	18.24	0.18197
2024-05-29 04:00:00	2107.5	17.85	0.0950605	2087.3	18.15	0.0676083	2344.9	18.12	0.18239
2024-05-29 04:30:00	2106.7	17.8	0.0952796	2087.2	18.07	0.0677642	2344.4	18.05	0.181134
2024-05-29 05:00:00	2105.9	17.76	0.0950605	2087	17.98	0.0672977	2343.3	17.95	0.181552
2024-05-29 05:30:00	2104.8	17.7	0.0957194	2086.2	17.9	0.0672977	2342.7	17.9	0.181552
2024-05-29 06:00:00	2103.7	17.7	0.0959401	2085.5	17.85	0.0669885	2342	17.81	0.18239
2024-05-29 06:30:00	2102.3	17.64	0.0959401	2084.8	17.8	0.0669885	2341.2	17.76	0.181552
2024-05-29 07:00:00	2100.4	17.66	0.0959401	2084.2	17.8	0.0668344	2340	17.74	0.181552
2024-05-29 07:30:00	2098.5	17.66	0.0959401	2083.5	17.8	0.0666807	2338.6	17.78	0.181552
2024-05-29 08:00:00	2096.4	17.6	0.0959401	2082.7	17.8	0.0660693	2337.4	17.7	0.181552
2024-05-29 08:30:00	2094.6	17.62	0.0961612	2081.6	17.8	0.0660693	2336.3	17.7	0.181134
2024-05-29 09:00:00	2091.6	17.92	0.0966051	2080.6	17.9	0.0656145	2334.5	17.82	0.180717
2024-05-29 09:30:00	2087.5	18.65	0.0966051	2079.1	18.17	0.0653131	2331.8	18.17	0.180717
2024-05-29 10:00:00	2083.4	19.29	0.0963829	2076.6	18.57	0.065013	2328.9	18.55	0.178649
2024-05-29 10:30:00	2079.7	19.62	0.0963829	2075	18.91	0.0642688	2325.4	18.81	0.180302
2024-05-29 11:00:00	2074.3	20.1	0.0959401	2072.1	19.24	0.0638263	2321.9	19.09	0.179887
2024-05-29 11:30:00	2067.1	21	0.0954993	2069.1	19.68	0.0630957	2317.8	19.52	0.180302
2024-05-29 12:00:00	2062.5	21.28	0.0950605	2067	20.06	0.0629506	2313.6	19.81	0.180302
2024-05-29 12:30:00	2057.1	21.68	0.0948418	2064.7	20.41	0.06223	2310.2	20.15	0.18197
2024-05-29 13:00:00	2052.3	21.96	0.0939723	2064.4	20.69	0.0618016	2332.8	20.36	0.200447
[truncated: 3,350 more rows]

## Sheet: Soil calibration
Soil Volume (cm3)	4000
Container Weight (g)	410.87
Dry Soil Weight (g)	6511.28
Bulk Density (g cm-3)	1.62782
Sensor Model	TEROS 12
Soil + Container Weights		wet wt	water wt	w	q	Sensor Measurements
						Sensor 1	Sensor 2
Points	g	g	g	g g-1	m3 m-3	RAW	RAW
Air dry	7040	6629.13	117.851	0.0180995	0.0294628	1988.3	1979.4
Point 2	7800	7389.13	877.851	0.13482	0.219463	2345.6	2369.9
Point 3	8000	7589.13	1077.85	0.165536	0.269463	2399.3	2470.7
Point 4	8180	7769.13	1257.85	0.19318	0.314463	2569.4	2514.9
Point 5	8240	7829.13	1317.85	0.202395	0.329463	2751.8	2740
Gravimetric Water Content Calculations of Air Dry Sample
	Values	Units
Wet Soil + Tin	65.31	g
Dry Soil + Tin	64.67	g
Tin Weight	28.67	g
Gravimetric WC, w	0.0177778	g g-1

## Sheet: Raw Data Config 1
z6-16679	Port 1	Port 1	Port 1	Port 2	Port 2	Port 2	Port 3	Port 3	Port 3	Port 4	Port 4	Port 4	Port 5	Port 5	Port 5	Port 7	Port 7	Port 8	Port 8
Records: 8641	TEROS 12	TEROS 12	TEROS 12	TEROS 12	TEROS 12	TEROS 12	TEROS 12	TEROS 12	TEROS 12	TEROS 12	TEROS 12	TEROS 12	TEROS 12	TEROS 12	TEROS 12	Battery	Battery	Barometer	Barometer
Timestamp	raw Raw VWC	°C Soil Temperature	mS/cm Bulk EC	raw Raw VWC	°C Soil Temperature	mS/cm Bulk EC	raw Raw VWC	°C Soil Temperature	mS/cm Bulk EC	raw Raw VWC	°C Soil Temperature	mS/cm Bulk EC	raw Raw VWC	°C Soil Temperature	mS/cm Bulk EC	% Battery Percent	mV Battery Voltage	kPa Reference Pressure	°C Logger Temperature
2024-03-05 15:30:00	65534	65534	65534	65534	65534	65534	65534	65534	65534	65534	65534	65534	65534	65534	65534	2000	6853	10053	7238
2024-03-05 16:00:00	65534	65534	65534	65534	65534	65534	65534	65534	65534	65534	65534	65534	65534	65534	65534	2000	6854	10053	7243
2024-03-05 16:30:00	65534	65534	65534	65534	65534	65534	65534	65534	65534	65534	65534	65534	65534	65534	65534	2000	6851	10054	7243
2024-03-05 17:00:00	65534	65534	65534	65534	65534	65534	65534	65534	65534	65534	65534	65534	65534	65534	65534	2000	6852	10054	7242
2024-03-05 17:30:00	65534	65534	65534	65534	65534	65534	65534	65534	65534	65534	65534	65534	65534	65534	65534	2000	6852	10054	7241
2024-03-05 18:00:00	65534	65534	65534	65534	65534	65534	65534	65534	65534	65534	65534	65534	65534	65534	65534	2000	6852	10054	7241
2024-03-05 18:30:00	65534	65534	65534	65534	65534	65534	65534	65534	65534	65534	65534	65534	65534	65534	65534	2000	6852	10055	7242
2024-03-05 19:00:00	65534	65534	65534	65534	65534	65534	65534	65534	65534	65534	65534	65534	65534	65534	65534	2000	6852	10054	7243
2024-03-05 19:30:00	65534	65534	65534	65534	65534	65534	65534	65534	65534	65534	65534	65534	65534	65534	65534	2000	6853	10056	7245
2024-03-05 20:00:00	65534	65534	65534	65534	65534	65534	65534	65534	65534	65534	65534	65534	65534	65534	65534	2000	6852	10057	7250
2024-03-05 20:30:00	65534	65534	65534	65534	65534	65534	65534	65534	65534	65534	65534	65534	65534	65534	65534	2000	6853	10060	7253
2024-03-05 21:00:00	65534	65534	65534	65534	65534	65534	65534	65534	65534	65534	65534	65534	65534	65534	65534	2000	6853	10063	7254
2024-03-05 21:30:00	65534	65534	65534	65534	65534	65534	65534	65534	65534	65534	65534	65534	65534	65534	65534	2000	6852	10064	7252
2024-03-05 22:00:00	65534	65534	65534	65534	65534	65534	65534	65534	65534	65534	65534	65534	65534	65534	65534	2000	6852	10066	7250
2024-03-05 22:30:00	65534	65534	65534	65534	65534	65534	65534	65534	65534	65534	65534	65534	65534	65534	65534	2000	6851	10068	7248
2024-03-05 23:00:00	65534	65534	65534	65534	65534	65534	65534	65534	65534	65534	65534	65534	65534	65534	65534	2000	6853	10069	7246
2024-03-05 23:30:00	65534	65534	65534	65534	65534	65534	65534	65534	65534	65534	65534	65534	65534	65534	65534	2000	6854	10069	7243
2024-03-06	65534	65534	65534	65534	65534	65534	65534	65534	65534	65534	65534	65534	65534	65534	65534	2000	6851	10071	7240
2024-03-06 00:30:00	65534	65534	65534	65534	65534	65534	65534	65534	65534	65534	65534	65534	65534	65534	65534	2000	6853	10072	7237
2024-03-06 01:00:00	65534	65534	65534	65534	65534	65534	65534	65534	65534	65534	65534	65534	65534	65534	65534	2000	6850	10074	7233
2024-03-06 01:30:00	65534	65534	65534	65534	65534	65534	65534	65534	65534	65534	65534	65534	65534	65534	65534	2000	6852	10075	7230
2024-03-06 02:00:00	65534	65534	65534	65534	65534	65534	65534	65534	65534	65534	65534	65534	65534	65534	65534	2000	6853	10077	7228
2024-03-06 02:30:00	65534	65534	65534	65534	65534	65534	65534	65534	65534	65534	65534	65534	65534	65534	65534	2000	6850	10077	7225
2024-03-06 03:00:00	65534	65534	65534	65534	65534	65534	65534	65534	65534	65534	65534	65534	65534	65534	65534	2000	6852	10078	7223
2024-03-06 03:30:00	65534	65534	65534	65534	65534	65534	65534	65534	65534	65534	65534	65534	65534	65534	65534	2000	6850	10077	7221
2024-03-06 04:00:00	65534	65534	65534	65534	65534	65534	65534	65534	65534	65534	65534	65534	65534	65534	65534	2000	6851	10075	7218
2024-03-06 04:30:00	65534	65534	65534	65534	65534	65534	65534	65534	65534	65534	65534	65534	65534	65534	65534	2000	6852	10075	7214
2024-03-06 05:00:00	65534	65534	65534	65534	65534	65534	65534	65534	65534	65534	65534	65534	65534	65534	65534	2000	6850	10074	7211
2024-03-06 05:30:00	65534	65534	65534	65534	65534	65534	65534	65534	65534	65534	65534	65534	65534	65534	65534	2000	6850	10075	7208
2024-03-06 06:00:00	65534	65534	65534	65534	65534	65534	65534	65534	65534	65534	65534	65534	65534	65534	65534	2000	6850	10078	7205
2024-03-06 06:30:00	65534	65534	65534	65534	65534	65534	65534	65534	65534	65534	65534	65534	65534	65534	65534	2000	6853	10079	7201
2024-03-06 07:00:00	65534	65534	65534	65534	65534	65534	65534	65534	65534	65534	65534	65534	65534	65534	65534	2000	6851	10081	7198
2024-03-06 07:30:00	65534	65534	65534	65534	65534	65534	65534	65534	65534	65534	65534	65534	65534	65534	65534	2000	6848	10084	7195
2024-03-06 08:00:00	65534	65534	65534	65534	65534	65534	65534	65534	65534	65534	65534	65534	65534	65534	65534	2000	6851	10086	7192
2024-03-06 08:30:00	65534	65534	65534	65534	65534	65534	65534	65534	65534	65534	65534	65534	65534	65534	65534	2000	6850	10088	7189
2024-03-06 09:00:00	65534	65534	65534	65534	65534	65534	65534	65534	65534	65534	65534	65534	65534	65534	65534	2000	6851	10090	7186
2024-03-06 09:30:00	65534	65534	65534	65534	65534	65534	65534	65534	65534	65534	65534	65534	65534	65534	65534	2000	6850	10093	7184
2024-03-06 10:00:00	65534	65534	65534	65534	65534	65534	65534	65534	65534	65534	65534	65534	65534	65534	65534	2000	6850	10094	7185
2024-03-06 10:30:00	65534	65534	65534	65534	65534	65534	65534	65534	65534	65534	65534	65534	65534	65534	65534	2000	6850	10096	7190
2024-03-06 11:00:00	65534	65534	65534	65534	65534	65534	65534	65534	65534	65534	65534	65534	65534	65534	65534	2000	6852	10095	7195
2024-03-06 11:30:00	65534	65534	65534	65534	65534	65534	65534	65534	65534	65534	65534	65534	65534	65534	65534	2000	6851	10095	7199
2024-03-06 12:00:00	65534	65534	65534	65534	65534	65534	65534	65534	65534	65534	65534	65534	65534	65534	65534	2000	6850	10093	7202
2024-03-06 12:30:00	65534	65534	65534	65534	65534	65534	65534	65534	65534	65534	65534	65534	65534	65534	65534	2000	6851	10092	7210
2024-03-06 13:00:00	65534	65534	65534	65534	65534	65534	65534	65534	65534	65534	65534	65534	65534	65534	65534	2000	6851	10092	7221
2024-03-06 13:30:00	65534	65534	65534	65534	65534	65534	65534	65534	65534	65534	65534	65534	65534	65534	65534	2000	6849	10090	7226
2024-03-06 14:00:00	65534	65534	65534	65534	65534	65534	65534	65534	65534	65534	65534	65534	65534	65534	65534	2000	6851	10088	7231
2024-03-06 14:30:00	65534	65534	65534	65534	65534	65534	65534	65534	65534	65534	65534	65534	65534	65534	65534	2000	6853	10087	7234
2024-03-06 15:00:00	65534	65534	65534	65534	65534	65534	65534	65534	65534	65534	65534	65534	65534	65534	65534	2000	6850	10085	7236
2024-03-06 15:30:00	65534	65534	65534	65534	65534	65534	65534	65534	65534	65534	65534	65534	65534	65534	65534	2000	6850	10085	7237
2024-03-06 16:00:00	65534	65534	65534	65534	65534	65534	65534	65534	65534	65534	65534	65534	65534	65534	65534	2000	6851	10084	7242
2024-03-06 16:30:00	65534	65534	65534	65534	65534	65534	65534	65534	65534	65534	65534	65534	65534	65534	65534	2000	6853	10084	7243
2024-03-06 17:00:00	65534	65534	65534	65534	65534	65534	65534	65534	65534	65534	65534	65534	65534	65534	65534	2000	6850	10084	7243
2024-03-06 17:30:00	65534	65534	65534	65534	65534	65534	65534	65534	65534	65534	65534	65534	65534	65534	65534	2000	6848	10084	7242
2024-03-06 18:00:00	65534	65534	65534	65534	65534	65534	65534	65534	65534	65534	65534	65534	65534	65534	65534	2000	6851	10084	7240
2024-03-06 18:30:00	65534	65534	65534	65534	65534	65534	65534	65534	65534	65534	65534	65534	65534	65534	65534	2000	6852	10086	7241
2024-03-06 19:00:00	65534	65534	65534	65534	65534	65534	65534	65534	65534	65534	65534	65534	65534	65534	65534	2000	6849	10087	7243
2024-03-06 19:30:00	65534	65534	65534	65534	65534	65534	65534	65534	65534	65534	65534	65534	65534	65534	65534	2000	6848	10088	7248
2024-03-06 20:00:00	65534	65534	65534	65534	65534	65534	65534	65534	65534	65534	65534	65534	65534	65534	65534	2000	6849	10089	7252
2024-03-06 20:30:00	65534	65534	65534	65534	65534	65534	65534	65534	65534	65534	65534	65534	65534	65534	65534	2000	6851	10091	7252
2024-03-06 21:00:00	65534	65534	65534	65534	65534	65534	65534	65534	65534	65534	65534	65534	65534	65534	65534	2000	6850	10092	7251
2024-03-06 21:30:00	65534	65534	65534	65534	65534	65534	65534	65534	65534	65534	65534	65534	65534	65534	65534	2000	6849	10093	7249
2024-03-06 22:00:00	65534	65534	65534	65534	65534	65534	65534	65534	65534	65534	65534	65534	65534	65534	65534	2000	6851	10094	7246
2024-03-06 22:30:00	65534	65534	65534	65534	65534	65534	65534	65534	65534	65534	65534	65534	65534	65534	65534	2000	6850	10096	7244
2024-03-06 23:00:00	65534	65534	65534	65534	65534	65534	65534	65534	65534	65534	65534	65534	65534	65534	65534	2000	6850	10099	7243
2024-03-06 23:30:00	65534	65534	65534	65534	65534	65534	65534	65534	65534	65534	65534	65534	65534	65534	65534	2000	6850	10101	7243
2024-03-07	65534	65534	65534	65534	65534	65534	65534	65534	65534	65534	65534	65534	65534	65534	65534	2000	6850	10101	7242
2024-03-07 00:30:00	65534	65534	65534	65534	65534	65534	65534	65534	65534	65534	65534	65534	65534	65534	65534	2000	6850	10101	7239
2024-03-07 01:00:00	65534	65534	65534	65534	65534	65534	65534	65534	65534	65534	65534	65534	65534	65534	65534	2000	6850	10102	7237
2024-03-07 01:30:00	65534	65534	65534	65534	65534	65534	65534	65534	65534	65534	65534	65534	65534	65534	65534	2000	6849	10102	7235
2024-03-07 02:00:00	65534	65534	65534	65534	65534	65534	65534	65534	65534	65534	65534	65534	65534	65534	65534	2000	6849	10104	7233
2024-03-07 02:30:00	65534	65534	65534	65534	65534	65534	65534	65534	65534	65534	65534	65534	65534	65534	65534	2000	6852	10107	7231
2024-03-07 03:00:00	65534	65534	65534	65534	65534	65534	65534	65534	65534	65534	65534	65534	65534	65534	65534	2000	6849	10109	7229
2024-03-07 03:30:00	65534	65534	65534	65534	65534	65534	65534	65534	65534	65534	65534	65534	65534	65534	65534	2000	6848	10110	7227
2024-03-07 04:00:00	65534	65534	65534	65534	65534	65534	65534	65534	65534	65534	65534	65534	65534	65534	65534	2000	6848	10111	7224
2024-03-07 04:30:00	65534	65534	65534	65534	65534	65534	65534	65534	65534	65534	65534	65534	65534	65534	65534	2000	6847	10112	7222
2024-03-07 05:00:00	65534	65534	65534	65534	65534	65534	65534	65534	65534	65534	65534	65534	65534	65534	65534	2000	6850	10114	7219
2024-03-07 05:30:00	65534	65534	65534	65534	65534	65534	65534	65534	65534	65534	65534	65534	65534	65534	65534	2000	6850	10117	7216
2024-03-07 06:00:00	65534	65534	65534	65534	65534	65534	65534	65534	65534	65534	65534	65534	65534	65534	65534	2000	6847	10119	7213
2024-03-07 06:30:00	65534	65534	65534	65534	65534	65534	65534	65534	65534	65534	65534	65534	65534	65534	65534	2000	6847	10120	7211
2024-03-07 07:00:00	65534	65534	65534	65534	65534	65534	65534	65534	65534	65534	65534	65534	65534	65534	65534	2000	6849	10121	7208
2024-03-07 07:30:00	65534	65534	65534	65534	65534	65534	65534	65534	65534	65534	65534	65534	65534	65534	65534	2000	6848	10123	7206
2024-03-07 08:00:00	65534	65534	65534	65534	65534	65534	65534	65534	65534	65534	65534	65534	65534	65534	65534	2000	6850	10125	7204
2024-03-07 08:30:00	65534	65534	65534	65534	65534	65534	65534	65534	65534	65534	65534	65534	65534	65534	65534	2000	6848	10128	7202
2024-03-07 09:00:00	65534	65534	65534	65534	65534	65534	65534	65534	65534	65534	65534	65534	65534	65534	65534	2000	6847	10132	7191
2024-03-07 09:30:00	65534	65534	65534	65534	65534	65534	65534	65534	65534	65534	65534	65534	65534	65534	65534	2000	6848	10135	7197
2024-03-07 10:00:00	65534	65534	65534	65534	65534	65534	65534	65534	65534	65534	65534	65534	65534	65534	65534	2000	6847	10147	7140
2024-03-07 10:30:00	65534	65534	65534	65534	65534	65534	65534	65534	65534	65534	65534	65534	65534	65534	65534	2000	6846	10151	7063
2024-03-07 11:00:00	65534	65534	65534	65534	65534	65534	65534	65534	65534	65534	65534	65534	65534	65534	65534	2000	6846	10154	7065
2024-03-07 11:30:00	65534	65534	65534	65534	65534	65534	65534	65534	65534	65534	65534	65534	65534	65534	65534	2000	6846	10154	7099
2024-03-07 12:00:00	65534	65534	65534	65534	65534	65534	65534	65534	65534	65534	65534	65534	65534	65534	65534	2000	6847	10154	7135
2024-03-07 12:30:00	65534	65534	65534	65534	65534	65534	65534	65534	65534	65534	65534	65534	65534	65534	65534	2000	6847	10154	7185
2024-03-07 13:00:00	65534	65534	65534	65534	65534	65534	65534	65534	65534	65534	65534	65534	65534	65534	65534	2000	6847	10152	7206
2024-03-07 13:30:00	65534	65534	65534	65534	65534	65534	65534	65534	65534	65534	65534	65534	65534	65534	65534	2000	6847	10152	7248
2024-03-07 14:00:00	65534	65534	65534	65534	65534	65534	65534	65534	65534	65534	65534	65534	65534	65534	65534	2000	6847	10152	7308
2024-03-07 14:30:00	65534	65534	65534	65534	65534	65534	65534	65534	65534	65534	65534	65534	65534	65534	65534	2000	6848	10149	7387
2024-03-07 15:00:00	65534	65534	65534	65534	65534	65534	65534	65534	65534	65534	65534	65534	65534	65534	65534	2000	6848	10146	7449
2024-03-07 15:30:00	65534	65534	65534	65534	65534	65534	65534	65534	65534	65534	65534	65534	65534	65534	65534	2000	6849	10144	7491
2024-03-07 16:00:00	65534	65534	65534	65534	65534	65534	65534	65534	65534	65534	65534	65534	65534	65534	65534	2000	6849	10145	7460
2024-03-07 16:30:00	65534	65534	65534	65534	65534	65534	65534	65534	65534	65534	65534	65534	65534	65534	65534	2000	6847	10144	7388
2024-03-07 17:00:00	65534	65534	65534	65534	65534	65534	65534	65534	65534	65534	65534	65534	65534	65534	65534	2000	6850	10144	7348
2024-03-07 17:30:00	65534	65534	65534	65534	65534	65534	65534	65534	65534	65534	65534	65534	65534	65534	65534	2000	6848	10144	7335
2024-03-07 18:00:00	65534	65534	65534	65534	65534	65534	65534	65534	65534	65534	65534	65534	65534	65534	65534	2000	6850	10145	7299
2024-03-07 18:30:00	65534	65534	65534	65534	65534	65534	65534	65534	65534	65534	65534	65534	65534	65534	65534	2000	6848	10145	7275
2024-03-07 19:00:00	65534	65534	65534	65534	65534	65534	65534	65534	65534	65534	65534	65534	65534	65534	65534	2000	6847	10147	7244
2024-03-07 19:30:00	65534	65534	65534	65534	65534	65534	65534	65534	65534	65534	65534	65534	65534	65534	65534	2000	6845	10147	7191
2024-03-07 20:00:00	65534	65534	65534	65534	65534	65534	65534	65534	65534	65534	65534	65534	65534	65534	65534	2000	6847	10149	7132
2024-03-07 20:30:00	65534	65534	65534	65534	65534	65534	65534	65534	65534	65534	65534	65534	65534	65534	65534	2000	6847	10150	7070
2024-03-07 21:00:00	65534	65534	65534	65534	65534	65534	65534	65534	65534	65534	65534	65534	65534	65534	65534	2000	6847	10152	7008
2024-03-07 21:30:00	65534	65534	65534	65534	65534	65534	65534	65534	65534	65534	65534	65534	65534	65534	65534	2000	6844	10155	6949
2024-03-07 22:00:00	65534	65534	65534	65534	65534	65534	65534	65534	65534	65534	65534	65534	65534	65534	65534	2000	6844	10157	6897
2024-03-07 22:30:00	65534	65534	65534	65534	65534	65534	65534	65534	65534	65534	65534	65534	65534	65534	65534	2000	6842	10158	6853
2024-03-07 23:00:00	65534	65534	65534	65534	65534	65534	65534	65534	65534	65534	65534	65534	65534	65534	65534	2000	6843	10158	6818
2024-03-07 23:30:00	65534	65534	65534	65534	65534	65534	65534	65534	65534	65534	65534	65534	65534	65534	65534	2000	6842	10158	6791
2024-03-08	65534	65534	65534	65534	65534	65534	65534	65534	65534	65534	65534	65534	65534	65534	65534	2000	6841	10157	6771
2024-03-08 00:30:00	65534	65534	65534	65534	65534	65534	65534	65534	65534	65534	65534	65534	65534	65534	65534	2000	6841	10160	6754
2024-03-08 01:00:00	65534	65534	65534	65534	65534	65534	65534	65534	65534	65534	65534	65534	65534	65534	65534	2000	6839	10161	6740
2024-03-08 01:30:00	65534	65534	65534	65534	65534	65534	65534	65534	65534	65534	65534	65534	65534	65534	65534	2000	6840	10163	6729
2024-03-08 02:00:00	65534	65534	65534	65534	65534	65534	65534	65534	65534	65534	65534	65534	65534	65534	65534	2000	6840	10163	6719
2024-03-08 02:30:00	65534	65534	65534	65534	65534	65534	65534	65534	65534	65534	65534	65534	65534	65534	65534	2000	6840	10163	6708
2024-03-08 03:00:00	65534	65534	65534	65534	65534	65534	65534	65534	65534	65534	65534	65534	65534	65534	65534	2000	6838	10163	6701
2024-03-08 03:30:00	65534	65534	65534	65534	65534	65534	65534	65534	65534	65534	65534	65534	65534	65534	65534	2000	6839	10163	6696
2024-03-08 04:00:00	65534	65534	65534	65534	65534	65534	65534	65534	65534	65534	65534	65534	65534	65534	65534	2000	6837	10161	6691
2024-03-08 04:30:00	65534	65534	65534	65534	65534	65534	65534	65534	65534	65534	65534	65534	65534	65534	65534	2000	6839	10160	6687
2024-03-08 05:00:00	65534	65534	65534	65534	65534	65534	65534	65534	65534	65534	65534	65534	65534	65534	65534	2000	6839	10159	6683
2024-03-08 05:30:00	65534	65534	65534	65534	65534	65534	65534	65534	65534	65534	65534	65534	65534	65534	65534	2000	6839	10158	6683
2024-03-08 06:00:00	65534	65534	65534	65534	65534	65534	65534	65534	65534	65534	65534	65534	65534	65534	65534	2000	6839	10157	6686
2024-03-08 06:30:00	65534	65534	65534	65534	65534	65534	65534	65534	65534	65534	65534	65534	65534	65534	65534	2000	6837	10156	6687
2024-03-08 07:00:00	65534	65534	65534	65534	65534	65534	65534	65534	65534	65534	65534	65534	65534	65534	65534	2000	6838	10155	6687
2024-03-08 07:30:00	65534	65534	65534	65534	65534	65534	65534	65534	65534	65534	65534	65534	65534	65534	65534	2000	6838	10153	6688
2024-03-08 08:00:00	65534	65534	65534	65534	65534	65534	65534	65534	65534	65534	65534	65534	65534	65534	65534	2000	6838	10152	6699
2024-03-08 08:30:00	65534	65534	65534	65534	65534	65534	65534	65534	65534	65534	65534	65534	65534	65534	65534	2000	6837	10152	6718
2024-03-08 09:00:00	65534	65534	65534	65534	65534	65534	65534	65534	65534	65534	65534	65534	65534	65534	65534	2000	6838	10153	6744
2024-03-08 09:30:00	65534	65534	65534	65534	65534	65534	65534	65534	65534	65534	65534	65534	65534	65534	65534	2000	6838	10152	6775
2024-03-08 10:00:00	65534	65534	65534	65534	65534	65534	65534	65534	65534	65534	65534	65534	65534	65534	65534	2000	6837	10150	6841
2024-03-08 10:30:00	65534	65534	65534	65534	65534	65534	65534	65534	65534	65534	65534	65534	65534	65534	65534	2000	6840	10146	6944
2024-03-08 11:00:00	65534	65534	65534	65534	65534	65534	65534	65534	65534	65534	65534	65534	65534	65534	65534	2000	6838	10144	7049
2024-03-08 11:30:00	65534	65534	65534	65534	65534	65534	65534	65534	65534	65534	65534	65534	65534	65534	65534	2000	6840	10141	7145
2024-03-08 12:00:00	65534	65534	65534	65534	65534	65534	65534	65534	65534	65534	65534	65534	65534	65534	65534	2000	6842	10138	7223
2024-03-08 12:30:00	65534	65534	65534	65534	65534	65534	65534	65534	65534	65534	65534	65534	65534	65534	65534	2000	6840	10133	7275
2024-03-08 13:00:00	65534	65534	65534	65534	65534	65534	65534	65534	65534	65534	65534	65534	65534	65534	65534	2000	6842	10128	7289
2024-03-08 13:30:00	65534	65534	65534	65534	65534	65534	65534	65534	65534	65534	65534	65534	65534	65534	65534	2000	6841	10122	7306
2024-03-08 14:00:00	65534	65534	65534	65534	65534	65534	65534	65534	65534	65534	65534	65534	65534	65534	65534	2000	6842	10114	7358
2024-03-08 14:30:00	65534	65534	65534	65534	65534	65534	65534	65534	65534	65534	65534	65534	65534	65534	65534	2000	6843	10106	7435
2024-03-08 15:00:00	65534	65534	65534	65534	65534	65534	65534	65534	65534	65534	65534	65534	65534	65534	65534	2000	6843	10098	7472
2024-03-08 15:30:00	65534	65534	65534	65534	65534	65534	65534	65534	65534	65534	65534	65534	65534	65534	65534	2000	6844	10092	7483
2024-03-08 16:00:00	65534	65534	65534	65534	65534	65534	65534	65534	65534	65534	65534	65534	65534	65534	65534	2000	6846	10088	7457
2024-03-08 16:30:00	65534	65534	65534	65534	65534	65534	65534	65534	65534	65534	65534	65534	65534	65534	65534	2000	6843	10083	7418
2024-03-08 17:00:00	65534	65534	65534	65534	65534	65534	65534	65534	65534	65534	65534	65534	65534	65534	65534	2000	6847	10079	7415
2024-03-08 17:30:00	65534	65534	65534	65534	65534	65534	65534	65534	65534	65534	65534	65534	65534	65534	65534	2000	6845	10075	7399
2024-03-08 18:00:00	65534	65534	65534	65534	65534	65534	65534	65534	65534	65534	65534	65534	65534	65534	65534	2000	6846	10071	7353
2024-03-08 18:30:00	65534	65534	65534	65534	65534	65534	65534	65534	65534	65534	65534	65534	65534	65534	65534	2000	6844	10068	7325
2024-03-08 19:00:00	65534	65534	65534	65534	65534	65534	65534	65534	65534	65534	65534	65534	65534	65534	65534	2000	6845	10065	7295
2024-03-08 19:30:00	65534	65534	65534	65534	65534	65534	65534	65534	65534	65534	65534	65534	65534	65534	65534	2000	6847	10065	7245
2024-03-08 20:00:00	65534	65534	65534	65534	65534	65534	65534	65534	65534	65534	65534	65534	65534	65534	65534	2000	6843	10065	7183
2024-03-08 20:30:00	65534	65534	65534	65534	65534	65534	65534	65534	65534	65534	65534	65534	65534	65534	65534	2000	6842	10065	7123
2024-03-08 21:00:00	65534	65534	65534	65534	65534	65534	65534	65534	65534	65534	65534	65534	65534	65534	65534	2000	6843	10063	7073
2024-03-08 21:30:00	65534	65534	65534	65534	65534	65534	65534	65534	65534	65534	65534	65534	65534	65534	65534	2000	6842	10062	7022
2024-03-08 22:00:00	65534	65534	65534	65534	65534	65534	65534	65534	65534	65534	65534	65534	65534	65534	65534	2000	6840	10062	6965
2024-03-08 22:30:00	65534	65534	65534	65534	65534	65534	65534	65534	65534	65534	65534	65534	65534	65534	65534	2000	6840	10063	6914
2024-03-08 23:00:00	65534	65534	65534	65534	65534	65534	65534	65534	65534	65534	65534	65534	65534	65534	65534	2000	6840	10060	6874
2024-03-08 23:30:00	65534	65534	65534	65534	65534	65534	65534	65534	65534	65534	65534	65534	65534	65534	65534	2000	6837	10057	6845
2024-03-09	65534	65534	65534	65534	65534	65534	65534	65534	65534	65534	65534	65534	65534	65534	65534	2000	6837	10054	6823
2024-03-09 00:30:00	65534	65534	65534	65534	65534	65534	65534	65534	65534	65534	65534	65534	65534	65534	65534	2000	6837	10052	6808
2024-03-09 01:00:00	65534	65534	65534	65534	65534	65534	65534	65534	65534	65534	65534	65534	65534	65534	65534	2000	6838	10050	6795
2024-03-09 01:30:00	65534	65534	65534	65534	65534	65534	65534	65534	65534	65534	65534	65534	65534	65534	65534	2000	6838	10046	6784
2024-03-09 02:00:00	65534	65534	65534	65534	65534	65534	65534	65534	65534	65534	65534	65534	65534	65534	65534	2000	6838	10043	6775
2024-03-09 02:30:00	65534	65534	65534	65534	65534	65534	65534	65534	65534	65534	65534	65534	65534	65534	65534	2000	6837	10041	6766
2024-03-09 03:00:00	65534	65534	65534	65534	65534	65534	65534	65534	65534	65534	65534	65534	65534	65534	65534	2000	6835	10039	6762
2024-03-09 03:30:00	65534	65534	65534	65534	65534	65534	65534	65534	65534	65534	65534	65534	65534	65534	65534	2000	6836	10037	6761
2024-03-09 04:00:00	65534	65534	65534	65534	65534	65534	65534	65534	65534	65534	65534	65534	65534	65534	65534	2000	6835	10033	6758
2024-03-09 04:30:00	65534	65534	65534	65534	65534	65534	65534	65534	65534	65534	65534	65534	65534	65534	65534	2000	6836	10029	6754
2024-03-09 05:00:00	65534	65534	65534	65534	65534	65534	65534	65534	65534	65534	65534	65534	65534	65534	65534	2000	6835	10026	6755
2024-03-09 05:30:00	65534	65534	65534	65534	65534	65534	65534	65534	65534	65534	65534	65534	65534	65534	65534	2000	6834	10027	6758
2024-03-09 06:00:00	65534	65534	65534	65534	65534	65534	65534	65534	65534	65534	65534	65534	65534	65534	65534	2000	6836	10030	6761
2024-03-09 06:30:00	65534	65534	65534	65534	65534	65534	65534	65534	65534	65534	65534	65534	65534	65534	65534	2000	6836	10031	6757
2024-03-09 07:00:00	65534	65534	65534	65534	65534	65534	65534	65534	65534	65534	65534	65534	65534	65534	65534	2000	6837	10030	6757
2024-03-09 07:30:00	65534	65534	65534	65534	65534	65534	65534	65534	65534	65534	65534	65534	65534	65534	65534	2000	6835	10033	6760
2024-03-09 08:00:00	65534	65534	65534	65534	65534	65534	65534	65534	65534	65534	65534	65534	65534	65534	65534	2000	6835	10034	6771
2024-03-09 08:30:00	65534	65534	65534	65534	65534	65534	65534	65534	65534	65534	65534	65534	65534	65534	65534	2000	6832	10037	6781
2024-03-09 09:00:00	65534	65534	65534	65534	65534	65534	65534	65534	65534	65534	65534	65534	65534	65534	65534	2000	6834	10038	6792
2024-03-09 09:30:00	65534	65534	65534	65534	65534	65534	65534	65534	65534	65534	65534	65534	65534	65534	65534	2000	6834	10039	6809
2024-03-09 10:00:00	65534	65534	65534	65534	65534	65534	65534	65534	65534	65534	65534	65534	65534	65534	65534	2000	6834	10038	6872
2024-03-09 10:30:00	65534	65534	65534	65534	65534	65534	65534	65534	65534	65534	65534	65534	65534	65534	65534	2000	6837	10040	6947
2024-03-09 11:00:00	65534	65534	65534	65534	65534	65534	65534	65534	65534	65534	65534	65534	65534	65534	65534	2000	6837	10040	7007
2024-03-09 11:30:00	65534	65534	65534	65534	65534	65534	65534	65534	65534	65534	65534	65534	65534	65534	65534	2000	6836	10045	7074
2024-03-09 12:00:00	65534	65534	65534	65534	65534	65534	65534	65534	65534	65534	65534	65534	65534	65534	65534	2000	6839	10048	7141
2024-03-09 12:30:00	65534	65534	65534	65534	65534	65534	65534	65534	65534	65534	65534	65534	65534	65534	65534	2000	6837	10047	7188
2024-03-09 13:00:00	65534	65534	65534	65534	65534	65534	65534	65534	65534	65534	65534	65534	65534	65534	65534	2000	6837	10049	7233
2024-03-09 13:30:00	65534	65534	65534	65534	65534	65534	65534	65534	65534	65534	65534	65534	65534	65534	65534	2000	6840	10048	7268
2024-03-09 14:00:00	65534	65534	65534	65534	65534	65534	65534	65534	65534	65534	65534	65534	65534	65534	65534	2000	6838	10045	7346
2024-03-09 14:30:00	65534	65534	65534	65534	65534	65534	65534	65534	65534	65534	65534	65534	65534	65534	65534	2000	6837	10048	7341
2024-03-09 15:00:00	65534	65534	65534	65534	65534	65534	65534	65534	65534	65534	65534	65534	65534	65534	65534	2000	6838	10047	7336
2024-03-09 15:30:00	65534	65534	65534	65534	65534	65534	65534	65534	65534	65534	65534	65534	65534	65534	65534	2000	6840	10048	7310
2024-03-09 16:00:00	65534	65534	65534	65534	65534	65534	65534	65534	65534	65534	65534	65534	65534	65534	65534	2000	6839	10046	7310
2024-03-09 16:30:00	65534	65534	65534	65534	65534	65534	65534	65534	65534	65534	65534	65534	65534	65534	65534	2000	6839	10046	7319
2024-03-09 17:00:00	65534	65534	65534	65534	65534	65534	65534	65534	65534	65534	65534	65534	65534	65534	65534	2000	6840	10045	7315
2024-03-09 17:30:00	65534	65534	65534	65534	65534	65534	65534	65534	65534	65534	65534	65534	65534	65534	65534	2000	6837	10039	7301
2024-03-09 18:00:00	65534	65534	65534	65534	65534	65534	65534	65534	65534	65534	65534	65534	65534	65534	65534	2000	6839	10035	7279
2024-03-09 18:30:00	65534	65534	65534	65534	65534	65534	65534	65534	65534	65534	65534	65534	65534	65534	65534	2000	6838	10034	7237
2024-03-09 19:00:00	65534	65534	65534	65534	65534	65534	65534	65534	65534	65534	65534	65534	65534	65534	65534	2000	6839	10031	7193
2024-03-09 19:30:00	65534	65534	65534	65534	65534	65534	65534	65534	65534	65534	65534	65534	65534	65534	65534	2000	6836	10025	7141
2024-03-09 20:00:00	65534	65534	65534	65534	65534	65534	65534	65534	65534	65534	65534	65534	65534	65534	65534	2000	6838	10023	7092
2024-03-09 20:30:00	65534	65534	65534	65534	65534	65534	65534	65534	65534	65534	65534	65534	65534	65534	65534	2000	6837	10023	7054
2024-03-09 21:00:00	65534	65534	65534	65534	65534	65534	65534	65534	65534	65534	65534	65534	65534	65534	65534	2000	6837	10018	7026
2024-03-09 21:30:00	65534	65534	65534	65534	65534	65534	65534	65534	65534	65534	65534	65534	65534	65534	65534	2000	6836	10014	6989
2024-03-09 22:00:00	65534	65534	65534	65534	65534	65534	65534	65534	65534	65534	65534	65534	65534	65534	65534	2000	6834	10010	6938
2024-03-09 22:30:00	65534	65534	65534	65534	65534	65534	65534	65534	65534	65534	65534	65534	65534	65534	65534	2000	6837	10008	6891
2024-03-09 23:00:00	65534	65534	65534	65534	65534	65534	65534	65534	65534	65534	65534	65534	65534	65534	65534	2000	6837	10006	6860
2024-03-09 23:30:00	65534	65534	65534	65534	65534	65534	65534	65534	65534	65534	65534	65534	65534	65534	65534	2000	6832	10002	6839
2024-03-10	65534	65534	65534	65534	65534	65534	65534	65534	65534	65534	65534	65534	65534	65534	65534	2000	6834	9998	6820
2024-03-10 00:30:00	65534	65534	65534	65534	65534	65534	65534	65534	65534	65534	65534	65534	65534	65534	65534	2000	6832	9992	6803
2024-03-10 01:00:00	65534	65534	65534	65534	65534	65534	65534	65534	65534	65534	65534	65534	65534	65534	65534	2000	6833	9987	6793
2024-03-10 01:30:00	65534	65534	65534	65534	65534	65534	65534	65534	65534	65534	65534	65534	65534	65534	65534	2000	6834	9980	6794
2024-03-10 02:00:00	65534	65534	65534	65534	65534	65534	65534	65534	65534	65534	65534	65534	65534	65534	65534	2000	6832	9974	6795
2024-03-10 02:30:00	65534	65534	65534	65534	65534	65534	65534	65534	65534	65534	65534	65534	65534	65534	65534	2000	6832	9969	6791
2024-03-10 03:00:00	65534	65534	65534	65534	65534	65534	65534	65534	65534	65534	65534	65534	65534	65534	65534	2000	6831	9967	6784
2024-03-10 03:30:00	65534	65534	65534	65534	65534	65534	65534	65534	65534	65534	65534	65534	65534	65534	65534	2000	6831	9973	6775
2024-03-10 04:00:00	65534	65534	65534	65534	65534	65534	65534	65534	65534	65534	65534	65534	65534	65534	65534	2000	6831	9979	6761
2024-03-10 04:30:00	65534	65534	65534	65534	65534	65534	65534	65534	65534	65534	65534	65534	65534	65534	65534	2000	6831	9982	6752
2024-03-10 05:00:00	65534	65534	65534	65534	65534	65534	65534	65534	65534	65534	65534	65534	65534	65534	65534	2000	6831	9985	6746
2024-03-10 05:30:00	65534	65534	65534	65534	65534	65534	65534	65534	65534	65534	65534	65534	65534	65534	65534	2000	6832	9987	6739
2024-03-10 06:00:00	65534	65534	65534	65534	65534	65534	65534	65534	65534	65534	65534	65534	65534	65534	65534	2000	6829	9987	6735
2024-03-10 06:30:00	65534	65534	65534	65534	65534	65534	65534	65534	65534	65534	65534	65534	65534	65534	65534	2000	6831	9987	6734
2024-03-10 07:00:00	65534	65534	65534	65534	65534	65534	65534	65534	65534	65534	65534	65534	65534	65534	65534	2000	6829	9988	6733
2024-03-10 07:30:00	65534	65534	65534	65534	65534	65534	65534	65534	65534	65534	65534	65534	65534	65534	65534	2000	6831	9992	6731
2024-03-10 08:00:00	65534	65534	65534	65534	65534	65534	65534	65534	65534	65534	65534	65534	65534	65534	65534	2000	6833	9990	6740
2024-03-10 08:30:00	65534	65534	65534	65534	65534	65534	65534	65534	65534	65534	65534	65534	65534	65534	65534	2000	6831	9988	6749
2024-03-10 09:00:00	65534	65534	65534	65534	65534	65534	65534	65534	65534	65534	65534	65534	65534	65534	65534	2000	6831	9991	6760
2024-03-10 09:30:00	65534	65534	65534	65534	65534	65534	65534	65534	65534	65534	65534	65534	65534	65534	65534	2000	6831	9991	6772
2024-03-10 10:00:00	65534	65534	65534	65534	65534	65534	65534	65534	65534	65534	65534	65534	65534	65534	65534	2000	6831	9994	6814
2024-03-10 10:30:00	65534	65534	65534	65534	65534	65534	65534	65534	65534	65534	65534	65534	65534	65534	65534	2000	6831	9995	6899
2024-03-10 11:00:00	65534	65534	65534	65534	65534	65534	65534	65534	65534	65534	65534	65534	65534	65534	65534	2000	6831	9998	6988
2024-03-10 11:30:00	65534	65534	65534	65534	65534	65534	65534	65534	65534	65534	65534	65534	65534	65534	65534	2000	6831	9999	7034
2024-03-10 12:00:00	65534	65534	65534	65534	65534	65534	65534	65534	65534	65534	65534	65534	65534	65534	65534	2000	6833	10000	7084
2024-03-10 12:30:00	65534	65534	65534	65534	65534	65534	65534	65534	65534	65534	65534	65534	65534	65534	65534	2000	6832	9998	7113
2024-03-10 13:00:00	65534	65534	65534	65534	65534	65534	65534	65534	65534	65534	65534	65534	65534	65534	65534	2000	6834	9999	7148
2024-03-10 13:30:00	65534	65534	65534	65534	65534	65534	65534	65534	65534	65534	65534	65534	65534	65534	65534	2000	6835	9999	7181
2024-03-10 14:00:00	65534	65534	65534	65534	65534	65534	65534	65534	65534	65534	65534	65534	65534	65534	65534	2000	6833	9999	7222
2024-03-10 14:30:00	65534	65534	65534	65534	65534	65534	65534	65534	65534	65534	65534	65534	65534	65534	65534	2000	6832	10001	7221
2024-03-10 15:00:00	65534	65534	65534	65534	65534	65534	65534	65534	65534	65534	65534	65534	65534	65534	65534	2000	6832	10005	7210
2024-03-10 15:30:00	65534	65534	65534	65534	65534	65534	65534	65534	65534	65534	65534	65534	65534	65534	65534	2000	6836	10006	7242
2024-03-10 16:00:00	65534	65534	65534	65534	65534	65534	65534	65534	65534	65534	65534	65534	65534	65534	65534	2000	6834	10007	7285
2024-03-10 16:30:00	65534	65534	65534	65534	65534	65534	65534	65534	65534	65534	65534	65534	65534	65534	65534	2000	6833	10014	7290
2024-03-10 17:00:00	65534	65534	65534	65534	65534	65534	65534	65534	65534	65534	65534	65534	65534	65534	65534	2000	6833	10018	7287
2024-03-10 17:30:00	65534	65534	65534	65534	65534	65534	65534	65534	65534	65534	65534	65534	65534	65534	65534	2000	6834	10021	7258
2024-03-10 18:00:00	65534	65534	65534	65534	65534	65534	65534	65534	65534	65534	65534	65534	65534	65534	65534	2000	6834	10026	7220
2024-03-10 18:30:00	65534	65534	65534	65534	65534	65534	65534	65534	65534	65534	65534	65534	65534	65534	65534	2000	6836	10028	7192
2024-03-10 19:00:00	65534	65534	65534	65534	65534	65534	65534	65534	65534	65534	65534	65534	65534	65534	65534	2000	6834	10029	7162
2024-03-10 19:30:00	65534	65534	65534	65534	65534	65534	65534	65534	65534	65534	65534	65534	65534	65534	65534	2000	6834	10030	7119
2024-03-10 20:00:00	65534	65534	65534	65534	65534	65534	65534	65534	65534	65534	65534	65534	65534	65534	65534	2000	6832	10034	7080
2024-03-10 20:30:00	65534	65534	65534	65534	65534	65534	65534	65534	65534	65534	65534	65534	65534	65534	65534	2000	6831	10037	7048
2024-03-10 21:00:00	65534	65534	65534	65534	65534	65534	65534	65534	65534	65534	65534	65534	65534	65534	65534	2000	6831	10040	7022
2024-03-10 21:30:00	65534	65534	65534	65534	65534	65534	65534	65534	65534	65534	65534	65534	65534	65534	65534	2000	6832	10043	6988
2024-03-10 22:00:00	65534	65534	65534	65534	65534	65534	65534	65534	65534	65534	65534	65534	65534	65534	65534	2000	6831	10047	6941
2024-03-10 22:30:00	65534	65534	65534	65534	65534	65534	65534	65534	65534	65534	65534	65534	65534	65534	65534	2000	6831	10050	6897
2024-03-10 23:00:00	65534	65534	65534	65534	65534	65534	65534	65534	65534	65534	65534	65534	65534	65534	65534	2000	6829	10055	6865
2024-03-10 23:30:00	65534	65534	65534	65534	65534	65534	65534	65534	65534	65534	65534	65534	65534	65534	65534	2000	6830	10054	6840
2024-03-11	65534	65534	65534	65534	65534	65534	65534	65534	65534	65534	65534	65534	65534	65534	65534	2000	6830	10053	6823
2024-03-11 00:30:00	65534	65534	65534	65534	65534	65534	65534	65534	65534	65534	65534	65534	65534	65534	65534	2000	6828	10052	6808
2024-03-11 01:00:00	65534	65534	65534	65534	65534	65534	65534	65534	65534	65534	65534	65534	65534	65534	65534	2000	6829	10050	6797
2024-03-11 01:30:00	65534	65534	65534	65534	65534	65534	65534	65534	65534	65534	65534	65534	65534	65534	65534	2000	6828	10050	6788
2024-03-11 02:00:00	65534	65534	65534	65534	65534	65534	65534	65534	65534	65534	65534	65534	65534	65534	65534	2000	6828	10048	6784
2024-03-11 02:30:00	65534	65534	65534	65534	65534	65534	65534	65534	65534	65534	65534	65534	65534	65534	65534	2000	6827	10047	6776
2024-03-11 03:00:00	65534	65534	65534	65534	65534	65534	65534	65534	65534	65534	65534	65534	65534	65534	65534	2000	6826	10046	6770
2024-03-11 03:30:00	65534	65534	65534	65534	65534	65534	65534	65534	65534	65534	65534	65534	65534	65534	65534	2000	6827	10049	6772
2024-03-11 04:00:00	65534	65534	65534	65534	65534	65534	65534	65534	65534	65534	65534	65534	65534	65534	65534	2000	6828	10047	6768
2024-03-11 04:30:00	65534	65534	65534	65534	65534	65534	65534	65534	65534	65534	65534	65534	65534	65534	65534	2000	6827	10044	6766
2024-03-11 05:00:00	65534	65534	65534	65534	65534	65534	65534	65534	65534	65534	65534	65534	65534	65534	65534	2000	6824	10043	6762
2024-03-11 05:30:00	65534	65534	65534	65534	65534	65534	65534	65534	65534	65534	65534	65534	65534	65534	65534	2000	6827	10042	6761
2024-03-11 06:00:00	65534	65534	65534	65534	65534	65534	65534	65534	65534	65534	65534	65534	65534	65534	65534	2000	6826	10040	6758
2024-03-11 06:30:00	65534	65534	65534	65534	65534	65534	65534	65534	65534	65534	65534	65534	65534	65534	65534	2000	6827	10041	6755
2024-03-11 07:00:00	65534	65534	65534	65534	65534	65534	65534	65534	65534	65534	65534	65534	65534	65534	65534	2000	6825	10038	6752
2024-03-11 07:30:00	65534	65534	65534	65534	65534	65534	65534	65534	65534	65534	65534	65534	65534	65534	65534	2000	6824	10036	6753
2024-03-11 08:00:00	65534	65534	65534	65534	65534	65534	65534	65534	65534	65534	65534	65534	65534	65534	65534	2000	6825	10034	6769
2024-03-11 08:30:00	65534	65534	65534	65534	65534	65534	65534	65534	65534	65534	65534	65534	65534	65534	65534	2000	6824	10031	6783
2024-03-11 09:00:00	65534	65534	65534	65534	65534	65534	65534	65534	65534	65534	65534	65534	65534	65534	65534	2000	6826	10029	6808
2024-03-11 09:30:00	65534	65534	65534	65534	65534	65534	65534	65534	65534	65534	65534	65534	65534	65534	65534	2000	6824	10025	6833
2024-03-11 10:00:00	65534	65534	65534	65534	65534	65534	65534	65534	65534	65534	65534	65534	65534	65534	65534	2000	6825	10023	6869
2024-03-11 10:30:00	65534	65534	65534	65534	65534	65534	65534	65534	65534	65534	65534	65534	65534	65534	65534	2000	6826	10020	6921
2024-03-11 11:00:00	65534	65534	65534	65534	65534	65534	65534	65534	65534	65534	65534	65534	65534	65534	65534	2000	6825	10016	6979
2024-03-11 11:30:00	65534	65534	65534	65534	65534	65534	65534	65534	65534	65534	65534	65534	65534	65534	65534	2000	6827	10015	7017
2024-03-11 12:00:00	65534	65534	65534	65534	65534	65534	65534	65534	65534	65534	65534	65534	65534	65534	65534	2000	6828	10011	7046
2024-03-11 12:30:00	65534	65534	65534	65534	65534	65534	65534	65534	65534	65534	65534	65534	65534	65534	65534	2000	6828	10007	7060
2024-03-11 13:00:00	65534	65534	65534	65534	65534	65534	65534	65534	65534	65534	65534	65534	65534	65534	65534	2000	6827	10005	7078
2024-03-11 13:30:00	65534	65534	65534	65534	65534	65534	65534	65534	65534	65534	65534	65534	65534	65534	65534	2000	6827	10002	7094
2024-03-11 14:00:00	65534	65534	65534	65534	65534	65534	65534	65534	65534	65534	65534	65534	65534	65534	65534	2000	6827	9997	7095
2024-03-11 14:30:00	65534	65534	65534	65534	65534	65534	65534	65534	65534	65534	65534	65534	65534	65534	65534	2000	6828	9991	7083
2024-03-11 15:00:00	65534	65534	65534	65534	65534	65534	65534	65534	65534	65534	65534	65534	65534	65534	65534	2000	6828	9990	7073
2024-03-11 15:30:00	65534	65534	65534	65534	65534	65534	65534	65534	65534	65534	65534	65534	65534	65534	65534	2000	6827	9988	7066
2024-03-11 16:00:00	65534	65534	65534	65534	65534	65534	65534	65534	65534	65534	65534	65534	65534	65534	65534	2000	6830	9984	7060
2024-03-11 16:30:00	20598	7172	1647	20672	7153	1972	18276	7218	1	19747	7165	1763	65534	65534	65534	2000	6828	9981	7131
2024-03-11 17:00:00	21432	7030	1799	20811	7071	1946	18284	7108	1	21172	7047	2086	65534	65534	65534	2000	6826	9977	7148
2024-03-11 17:30:00	21417	6981	1800	20812	7022	1949	18285	7034	0	21154	6978	2089	65534	65534	65534	2000	6824	9975	7137
2024-03-11 18:00:00	21408	6975	1800	20810	7011	1949	18284	7024	0	21143	6970	2089	65534	65534	65534	2000	6821	9973	7139
2024-03-11 18:30:00	21397	6975	1800	20812	6997	1948	18286	7012	1	21135	6969	2088	65534	65534	65534	2000	6819	9973	7127
2024-03-11 19:00:00	21393	6952	1800	20817	6936	1946	18285	6964	0	21130	6946	2087	65534	65534	65534	2000	6815	9973	7046
2024-03-11 19:30:00	21392	6915	1801	20827	6865	1952	18286	6908	0	21129	6904	2091	65534	65534	65534	2000	6811	9975	6958
2024-03-11 20:00:00	21395	6877	1801	20838	6809	1953	18283	6859	0	21131	6867	2093	65534	65534	65534	2000	6810	9980	6890
2024-03-11 20:30:00	21397	6851	1801	20845	6778	1951	18281	6826	0	21133	6840	2093	65534	65534	65534	2000	6806	9981	6854
2024-03-11 21:00:00	21401	6832	1802	20850	6770	1950	18281	6808	0	21135	6823	2091	65534	65534	65534	2000	6805	9983	6854
2024-03-11 21:30:00	21402	6818	1800	20853	6766	1949	18282	6794	1	21136	6811	2090	65534	65534	65534	2000	6802	9986	6840
2024-03-11 22:00:00	21405	6789	1802	20854	6749	1948	18280	6771	0	21135	6785	2086	65534	65534	65534	2000	6802	9991	6812
2024-03-11 22:30:00	21408	6773	1800	20857	6745	1948	18280	6763	1	21136	6772	2083	65534	65534	65534	2000	6799	9993	6804
2024-03-11 23:00:00	21412	6762	1801	20856	6741	1948	18278	6758	1	21138	6763	2085	65534	65534	65534	2000	6797	9997	6797
2024-03-11 23:30:00	21413	6750	1801	20857	6736	1949	18277	6754	0	21138	6759	2084	65534	65534	65534	2000	6798	9998	6796
2024-03-12	21416	6740	1800	20855	6727	1948	18278	6745	1	21139	6750	2085	65534	65534	65534	2000	6792	9999	6793
2024-03-12 00:30:00	21415	6741	1800	20857	6729	1947	18277	6745	1	21135	6745	2086	65534	65534	65534	2000	6789	10001	6800
2024-03-12 01:00:00	21414	6740	1800	20854	6734	1947	18280	6746	1	21136	6746	2085	65534	65534	65534	2000	6790	10002	6804
2024-03-12 01:30:00	21412	6740	1801	20856	6730	1947	18277	6743	0	21134	6742	2084	65534	65534	65534	2000	6788	10002	6801
2024-03-12 02:00:00	21412	6737	1800	20853	6731	1948	18280	6744	0	21132	6740	2086	65534	65534	65534	2000	6786	10004	6805
2024-03-12 02:30:00	21413	6737	1802	20852	6734	1948	18275	6745	1	21130	6744	2085	65534	65534	65534	2000	6784	10005	6803
2024-03-12 03:00:00	21410	6734	1801	20851	6731	1949	18276	6741	0	21128	6740	2083	65534	65534	65534	2000	6783	10007	6800
2024-03-12 03:30:00	21409	6730	1801	20852	6726	1948	18278	6737	0	21124	6740	2081	65534	65534	65534	2000	6780	10010	6800
2024-03-12 04:00:00	21409	6725	1802	20849	6724	1948	18280	6735	1	21124	6736	2081	65534	65534	65534	2000	6780	10009	6794
2024-03-12 04:30:00	21408	6725	1800	20850	6729	1947	18278	6737	1	21124	6738	2082	65534	65534	65534	2000	6777	10010	6802
2024-03-12 05:00:00	21405	6724	1800	20849	6730	1948	18278	6736	1	21120	6737	2081	65534	65534	65534	2000	6776	10013	6803
2024-03-12 05:30:00	21401	6726	1800	20848	6730	1948	18277	6737	1	21120	6738	2081	65534	65534	65534	2000	6774	10018	6802
2024-03-12 06:00:00	21398	6728	1800	20844	6734	1948	18278	6738	1	21116	6738	2081	65534	65534	65534	2000	6775	10024	6804
2024-03-12 06:30:00	21398	6729	1800	20843	6734	1948	18278	6736	0	21114	6738	2082	65534	65534	65534	2000	6774	10029	6800
2024-03-12 07:00:00	21395	6720	1800	20843	6725	1948	18278	6731	0	21113	6734	2082	65534	65534	65534	2000	6771	10034	6792
2024-03-12 07:30:00	21392	6726	1799	20840	6734	1948	18277	6739	0	21111	6737	2080	65534	65534	65534	2000	6767	10038	6818
2024-03-12 08:00:00	21382	6742	1799	20838	6743	1947	18278	6747	0	21108	6752	2078	65534	65534	65534	2000	6767	10043	6839
2024-03-12 08:30:00	21371	6751	1798	20837	6749	1947	18281	6754	0	21104	6757	2078	65534	65534	65534	2000	6767	10048	6852
2024-03-12 09:00:00	21360	6756	1799	20827	6757	1947	18279	6763	0	21100	6760	2078	65534	65534	65534	2000	6769	10051	6857
2024-03-12 09:30:00	21342	6786	1794	20794	6860	1947	18284	6828	0	21096	6785	2077	65534	65534	65534	2000	6816	10059	6949
2024-03-12 10:00:00	21322	6823	1793	20789	6932	1943	18283	6886	0	21087	6822	2077	65534	65534	65534	2000	6807	10067	7027
2024-03-12 10:30:00	21298	6866	1792	20778	6980	1941	18288	6937	0	21078	6864	2073	65534	65534	65534	2000	6933	10072	7109
2024-03-12 11:00:00	21266	6946	1789	20708	7186	1941	18289	7058	1	21060	6942	2072	65534	65534	65534	2008	7034	10076	7295
2024-03-12 11:30:00	21225	7021	1786	20636	7432	1941	18291	7121	0	21043	6996	2074	65534	65534	65534	2015	7090	10080	7466
2024-03-12 12:00:00	21197	7010	1788	20640	7369	1944	18289	7103	0	21032	6976	2077	65534	65534	65534	2022	7151	10084	7403
2024-03-12 12:30:00	21168	7035	1786	20635	7384	1943	18292	7144	1	21022	6982	2076	65534	65534	65534	2028	7200	10086	7441
2024-03-12 13:00:00	21138	7066	1784	20646	7361	1940	18291	7184	0	21014	6980	2076	65534	65534	65534	2033	7239	10088	7483
2024-03-12 13:30:00	21102	7113	1778	20644	7370	1937	18308	7430	0	21003	6999	2074	65534	65534	65534	2034	7251	10091	7562
2024-03-12 14:00:00	21072	7120	1779	20638	7383	1934	18309	7604	0	20988	7032	2073	65534	65534	65534	2037	7272	10094	7606
2024-03-12 14:30:00	21045	7135	1777	20633	7394	1934	18302	7724	0	20974	7074	2072	65534	65534	65534	2027	7194	10102	7653
2024-03-12 15:00:00	21020	7121	1777	20638	7356	1935	18297	7486	0	20962	7075	2072	65534	65534	65534	2027	7191	10105	7542
2024-03-12 15:30:00	21005	7116	1774	20644	7330	1934	18294	7372	0	20951	7078	2072	65534	65534	65534	2026	7183	10105	7482
2024-03-12 16:00:00	20979	7121	1771	20642	7311	1933	18292	7315	0	20943	7075	2071	65534	65534	65534	2026	7180	10106	7483
2024-03-12 16:30:00	20964	7074	1769	20644	7258	1934	18296	7258	0	20940	7027	2071	65534	65534	65534	2021	7137	10111	7450
2024-03-12 17:00:00	20947	7089	1765	20640	7273	1932	18300	7307	1	20931	7054	2069	65534	65534	65534	2022	7148	10115	7499
2024-03-12 17:30:00	20930	7085	1764	20642	7250	1932	18298	7290	0	20923	7059	2068	65534	65534	65534	2019	7127	10121	7411
2024-03-12 18:00:00	20921	7076	1764	20643	7218	1934	18294	7247	0	20914	7047	2068	65534	65534	65534	2019	7124	10129	7330
2024-03-12 18:30:00	20914	7054	1763	20650	7156	1934	18286	7194	1	20913	7031	2068	65534	65534	65534	2014	7080	10133	7235
2024-03-12 19:00:00	20909	7036	1763	20658	7106	1929	18286	7154	1	20911	7017	2067	65534	65534	65534	2014	7084	10136	7172
2024-03-12 19:30:00	20909	6998	1763	20669	7050	1931	18285	7083	0	20910	6981	2065	65534	65534	65534	2010	7046	10139	7105
2024-03-12 20:00:00	20909	6956	1764	20680	6978	1935	18282	7019	1	20912	6940	2066	65534	65534	65534	2010	7048	10144	7020
2024-03-12 20:30:00	20916	6920	1764	20688	6918	1935	18283	6967	1	20916	6902	2067	65534	65534	65534	2010	7050	10151	6953
2024-03-12 21:00:00	20917	6890	1763	20696	6879	1933	18284	6929	0	20919	6873	2068	65534	65534	65534	2007	7026	10153	6916
2024-03-12 21:30:00	20923	6849	1763	20703	6831	1934	18280	6879	1	20925	6838	2063	65534	65534	65534	2008	7031	10158	6848
2024-03-12 22:00:00	20926	6817	1763	20712	6804	1935	18281	6841	1	20930	6806	2061	65534	65534	65534	2002	6983	10163	6813
2024-03-12 22:30:00	20930	6797	1766	20716	6792	1935	18280	6826	1	20931	6794	2061	65534	65534	65534	2002	6979	10163	6806
2024-03-12 23:00:00	20938	6784	1765	20716	6785	1934	18279	6813	0	20934	6784	2064	65534	65534	65534	2002	6985	10165	6808
2024-03-12 23:30:00	20938	6773	1765	20718	6776	1934	18277	6804	0	20935	6777	2065	65534	65534	65534	2003	6987	10168	6805
2024-03-13	20942	6765	1764	20720	6770	1934	18276	6792	1	20932	6772	2063	65534	65534	65534	2003	6986	10171	6802
2024-03-13 00:30:00	20944	6758	1765	20721	6761	1933	18277	6785	0	20930	6761	2063	65534	65534	65534	2000	6852	10174	6817
2024-03-13 01:00:00	20945	6752	1764	20722	6757	1934	18277	6783	1	20932	6760	2062	65534	65534	65534	2000	6878	10176	6809
2024-03-13 01:30:00	20948	6747	1764	20722	6756	1933	18278	6777	1	20930	6757	2061	65534	65534	65534	2000	6890	10177	6809
2024-03-13 02:00:00	20950	6742	1764	20722	6754	1931	18277	6774	1	20930	6753	2062	65534	65534	65534	2000	6895	10182	6810
2024-03-13 02:30:00	20954	6740	1766	20718	6748	1931	18275	6768	1	20931	6749	2062	65534	65534	65534	2000	6897	10184	6808
2024-03-13 03:00:00	20950	6733	1765	20721	6744	1931	18277	6760	0	20930	6743	2061	65534	65534	65534	2000	6900	10184	6804
2024-03-13 03:30:00	20951	6730	1764	20719	6738	1930	18275	6755	1	20930	6736	2061	65534	65534	65534	2000	6901	10186	6801
2024-03-13 04:00:00	20951	6726	1764	20721	6738	1931	18276	6756	1	20931	6737	2061	65534	65534	65534	2000	6902	10185	6805
2024-03-13 04:30:00	20953	6722	1764	20719	6737	1929	18275	6752	1	20928	6736	2060	65534	65534	65534	2000	6903	10184	6803
2024-03-13 05:00:00	20953	6720	1765	20719	6733	1927	18275	6745	0	20927	6731	2060	65534	65534	65534	2000	6904	10186	6801
2024-03-13 05:30:00	20953	6719	1764	20715	6734	1929	18276	6744	1	20925	6730	2059	65534	65534	65534	2000	6903	10189	6804
2024-03-13 06:00:00	20950	6712	1763	20715	6732	1925	18275	6740	0	20926	6725	2058	65534	65534	65534	2000	6902	10193	6800
2024-03-13 06:30:00	20950	6710	1764	20713	6730	1928	18273	6738	0	20922	6723	2058	65534	65534	65534	2000	6902	10195	6798
2024-03-13 07:00:00	20949	6712	1764	20710	6735	1928	18274	6740	0	20919	6725	2057	65534	65534	65534	2000	6901	10199	6810
2024-03-13 07:30:00	20941	6719	1763	20711	6734	1928	18274	6743	1	20916	6731	2055	65534	65534	65534	2000	6901	10203	6830
2024-03-13 08:00:00	20934	6734	1763	20708	6746	1928	18274	6750	1	20916	6743	2058	65534	65534	65534	2000	6902	10205	6852
2024-03-13 08:30:00	20923	6750	1760	20698	6762	1928	18274	6762	1	20910	6751	2057	65534	65534	65534	2000	6907	10209	6864
2024-03-13 09:00:00	20909	6775	1756	20678	6837	1930	18278	6823	0	20907	6775	2055	65534	65534	65534	2002	6983	10211	6957
2024-03-13 09:30:00	20885	6799	1756	20653	6927	1930	18282	6872	1	20900	6797	2056	65534	65534	65534	2004	6996	10212	7018
2024-03-13 10:00:00	20872	6825	1755	20642	6989	1931	18284	6920	1	20892	6824	2055	65534	65534	65534	2005	7007	10212	7069
2024-03-13 10:30:00	20847	6884	1751	20631	7056	1928	18281	7000	1	20881	6882	2052	65534	65534	65534	2002	6981	10214	7175
2024-03-13 11:00:00	20820	6947	1748	20600	7159	1924	18285	7091	0	20867	6940	2048	65534	65534	65534	2014	7084	10217	7293
2024-03-13 11:30:00	20791	7016	1744	20560	7300	1922	18285	7170	1	20851	6993	2052	65534	65534	65534	2022	7145	10217	7434
2024-03-13 12:00:00	20762	7052	1741	20541	7361	1924	18284	7211	0	20835	7020	2053	65534	65534	65534	2024	7169	10217	7493
2024-03-13 12:30:00	20737	7079	1740	20537	7374	1922	18286	7236	1	20820	7046	2052	65534	65534	65534	2027	7190	10216	7504
2024-03-13 13:00:00	20710	7103	1737	20528	7378	1921	18288	7269	0	20810	7067	2052	65534	65534	65534	2027	7195	10216	7525
2024-03-13 13:30:00	20685	7110	1734	20527	7361	1920	18289	7281	1	20798	7079	2052	65534	65534	65534	2029	7208	10214	7508
2024-03-13 14:00:00	20661	7125	1732	20519	7372	1915	18291	7333	1	20785	7098	2047	65534	65534	65534	2033	7244	10214	7521
2024-03-13 14:30:00	20634	7136	1731	20508	7387	1911	18290	7412	0	20774	7104	2047	65534	65534	65534	2036	7266	10212	7552
2024-03-13 15:00:00	20615	7133	1726	20505	7367	1914	18288	7388	0	20767	7100	2047	65534	65534	65534	2034	7253	10212	7542
2024-03-13 15:30:00	20593	7137	1725	20507	7342	1914	18289	7336	0	20757	7106	2047	65534	65534	65534	2034	7248	10212	7497
2024-03-13 16:00:00	20574	7152	1724	20505	7351	1914	18289	7335	0	20750	7124	2045	65534	65534	65534	2034	7251	10213	7495
2024-03-13 16:30:00	20558	7156	1722	20501	7342	1914	18289	7314	0	20741	7128	2045	65534	65534	65534	2033	7243	10214	7465
2024-03-13 17:00:00	20542	7141	1717	20501	7306	1912	18293	7297	0	20733	7117	2046	65534	65534	65534	2032	7236	10214	7442
2024-03-13 17:30:00	20530	7120	1716	20506	7271	1911	18289	7270	0	20728	7101	2049	65534	65534	65534	2030	7219	10215	7383
2024-03-13 18:00:00	20522	7120	1716	20506	7253	1911	18284	7252	0	20725	7100	2049	65534	65534	65534	2030	7219	10215	7349
2024-03-13 18:30:00	20512	7119	1715	20506	7244	1910	18284	7250	0	20716	7107	2049	65534	65534	65534	2029	7210	10216	7335
2024-03-13 19:00:00	20505	7088	1714	20512	7185	1911	18282	7187	1	20715	7077	2047	65534	65534	65534	2029	7207	10218	7256
2024-03-13 19:30:00	20501	7037	1713	20520	7104	1910	18280	7106	1	20715	7030	2049	65534	65534	65534	2028	7203	10217	7154
2024-03-13 20:00:00	20506	6992	1712	20531	7035	1912	18278	7041	1	20718	6984	2045	65534	65534	65534	2027	7194	10218	7075
2024-03-13 20:30:00	20507	6961	1710	20537	6978	1907	18276	7003	1	20722	6952	2048	65534	65534	65534	2027	7192	10218	7024
2024-03-13 21:00:00	20510	6930	1710	20541	6932	1906	18276	6963	1	20725	6927	2048	65534	65534	65534	2027	7188	10218	6967
2024-03-13 21:30:00	20514	6882	1710	20548	6864	1909	18276	6907	0	20726	6886	2046	65534	65534	65534	2026	7179	10219	6869
2024-03-13 22:00:00	20522	6840	1710	20558	6820	1909	18273	6861	0	20732	6842	2046	65534	65534	65534	2026	7179	10222	6811
2024-03-13 22:30:00	20530	6815	1710	20564	6796	1909	18273	6834	0	20737	6819	2042	65534	65534	65534	2025	7175	10225	6789
2024-03-13 23:00:00	20532	6799	1710	20566	6787	1909	18275	6823	1	20739	6808	2044	65534	65534	65534	2024	7167	10225	6789
2024-03-13 23:30:00	20532	6784	1714	20569	6776	1908	18273	6808	1	20742	6796	2043	65534	65534	65534	2024	7169	10226	6787
2024-03-14	20533	6777	1715	20572	6772	1908	18272	6798	0	20741	6789	2044	65534	65534	65534	2024	7167	10227	6785
2024-03-14 00:30:00	20533	6764	1713	20570	6762	1909	18272	6784	1	20742	6775	2042	65534	65534	65534	2010	7050	10227	6795
2024-03-14 01:00:00	20535	6754	1712	20572	6755	1909	18272	6777	0	20740	6770	2041	65534	65534	65534	2013	7070	10229	6784
2024-03-14 01:30:00	20538	6749	1712	20574	6753	1908	18272	6769	0	20739	6762	2040	65534	65534	65534	2014	7079	10229	6782
2024-03-14 02:00:00	20537	6740	1710	20574	6750	1908	18272	6764	1	20739	6758	2039	65534	65534	65534	2014	7083	10228	6783
2024-03-14 02:30:00	20540	6740	1710	20570	6749	1908	18269	6759	0	20737	6751	2039	65534	65534	65534	2014	7083	10228	6789
2024-03-14 03:00:00	20537	6736	1712	20572	6746	1908	18270	6753	1	20735	6746	2038	65534	65534	65534	2014	7084	10228	6783
2024-03-14 03:30:00	20536	6730	1713	20572	6744	1908	18269	6749	1	20735	6739	2038	65534	65534	65534	2014	7085	10226	6785
2024-03-14 04:00:00	20536	6731	1711	20571	6743	1908	18270	6749	1	20735	6739	2037	65534	65534	65534	2015	7087	10225	6790
2024-03-14 04:30:00	20534	6730	1708	20570	6741	1908	18268	6745	1	20734	6736	2037	65534	65534	65534	2013	7077	10224	6790
2024-03-14 05:00:00	20532	6730	1708	20566	6739	1908	18268	6743	1	20732	6730	2037	65534	65534	65534	2014	7081	10226	6790
2024-03-14 05:30:00	20532	6721	1708	20568	6733	1908	18270	6735	1	20733	6725	2037	65534	65534	65534	2013	7076	10224	6781
2024-03-14 06:00:00	20530	6720	1707	20567	6732	1908	18271	6734	0	20730	6720	2037	65534	65534	65534	2013	7076	10224	6784
2024-03-14 06:30:00	20528	6715	1708	20567	6726	1909	18267	6729	0	20729	6720	2037	65534	65534	65534	2014	7079	10224	6785
2024-03-14 07:00:00	20527	6711	1708	20564	6717	1908	18269	6722	0	20728	6712	2036	65534	65534	65534	2013	7071	10225	6776
2024-03-14 07:30:00	20524	6713	1707	20565	6725	1906	18269	6726	1	20726	6714	2036	65534	65534	65534	2013	7070	10225	6805
2024-03-14 08:00:00	20518	6731	1704	20559	6737	1905	18269	6735	1	20721	6730	2033	65534	65534	65534	2012	7066	10225	6833
2024-03-14 08:30:00	20506	6740	1700	20552	6759	1904	18269	6749	0	20718	6740	2033	65534	65534	65534	2012	7068	10223	6856
2024-03-14 09:00:00	20492	6763	1699	20860	6847	2014	18271	6802	1	20707	6756	2032	65534	65534	65534	2028	7196	10225	6946
2024-03-14 09:30:00	20460	6819	1692	21215	7179	2082	18275	6894	0	22115	6850	2239	65534	65534	65534	2033	7239	10223	7100
2024-03-14 10:00:00	20418	6903	1689	21042	7448	2063	19661	6998	1969	24207	6996	2388	65534	65534	65534	2043	7328	10219	7306
2024-03-14 10:30:00	24780	6791	2000	21013	7689	2081	23200	7073	2459	23825	7015	2347	65534	65534	65534	2048	7365	10215	7535
2024-03-14 11:00:00	24171	6823	1942	21035	7698	2089	22876	7113	2403	23603	6999	2328	65534	65534	65534	2052	7403	10212	7606
2024-03-14 11:30:00	23745	6897	1916	21021	7719	2084	22724	7144	2379	23478	6986	2317	65534	65534	65534	2054	7418	10210	7639
2024-03-14 12:00:00	23509	6912	1905	21045	7629	2080	22628	7118	2367	23398	6940	2313	65534	65534	65534	2057	7447	10205	7565
2024-03-14 12:30:00	23348	6944	1896	21085	7500	2077	22558	7126	2354	23342	6930	2309	65534	65534	65534	2063	7491	10201	7532
2024-03-14 13:00:00	23225	6968	1891	21105	7418	2075	22494	7151	2344	23293	6917	2303	65534	65534	65534	2063	7492	10197	7528
2024-03-14 13:30:00	23121	7015	1887	21118	7395	2072	22428	7208	2335	23244	6935	2295	65534	65534	65534	2060	7471	10193	7560
2024-03-14 14:00:00	23043	7037	1886	21122	7421	2067	22355	7302	2324	23191	6965	2291	65534	65534	65534	2064	7503	10186	7631
2024-03-14 14:30:00	22973	7058	1886	21114	7415	2065	22255	7445	2313	23138	7009	2285	65534	65534	65534	2064	7498	10179	7693
2024-03-14 15:00:00	22897	7084	1886	21109	7394	2065	22138	7528	2305	23083	7046	2281	65534	65534	65534	2062	7485	10174	7716
2024-03-14 15:30:00	22823	7119	1883	21105	7390	2064	22056	7564	2298	23030	7095	2276	65534	65534	65534	2060	7467	10170	7727
2024-03-14 16:00:00	22744	7140	1881	21099	7396	2061	22032	7459	2298	22976	7141	2274	65534	65534	65534	2059	7460	10167	7752
2024-03-14 16:30:00	22685	7130	1881	21095	7379	2060	22004	7425	2294	22944	7099	2274	65534	65534	65534	2058	7451	10165	7738
2024-03-14 17:00:00	22642	7105	1883	21095	7350	2056	21947	7436	2288	22921	7072	2272	65534	65534	65534	2057	7446	10162	7755
2024-03-14 17:30:00	22616	7088	1883	21093	7311	2058	21898	7480	2282	22899	7070	2268	65534	65534	65534	2056	7438	10157	7652
2024-03-14 18:00:00	22592	7069	1885	21098	7277	2060	21877	7424	2280	22879	7050	2269	65534	65534	65534	2056	7432	10153	7518
2024-03-14 18:30:00	22573	7082	1884	21099	7276	2060	21882	7403	2276	22868	7053	2268	65534	65534	65534	2056	7431	10151	7487
2024-03-14 19:00:00	22555	7100	1885	21103	7263	2059	21884	7391	2273	22853	7070	2264	65534	65534	65534	2055	7422	10150	7432
2024-03-14 19:30:00	22545	7081	1886	21114	7193	2059	21900	7316	2273	22846	7051	2267	65534	65534	65534	2054	7416	10148	7309
2024-03-14 20:00:00	22546	7035	1889	21131	7108	2061	21926	7223	2272	22845	7015	2271	65534	65534	65534	2053	7412	10147	7181
2024-03-14 20:30:00	22549	6993	1891	21149	7042	2060	21953	7149	2270	22847	6980	2272	65534	65534	65534	2053	7409	10146	7092
2024-03-14 21:00:00	22548	6970	1890	21160	6997	2060	21977	7101	2268	22850	6958	2269	65534	65534	65534	2052	7404	10146	7033
2024-03-14 21:30:00	22553	6945	1892	21169	6950	2060	21988	7048	2267	22851	6932	2267	65534	65534	65534	2052	7398	10147	6947
2024-03-14 22:00:00	22564	6900	1892	21182	6881	2059	22010	6979	2267	22858	6886	2270	65534	65534	65534	2052	7397	10149	6836
2024-03-14 22:30:00	22578	6870	1895	21191	6848	2060	22024	6942	2267	22871	6860	2271	65534	65534	65534	2045	7346	10150	6812
2024-03-14 23:00:00	22581	6847	1895	21199	6827	2060	22036	6914	2265	22877	6840	2272	65534	65534	65534	2047	7359	10149	6795
2024-03-14 23:30:00	22587	6831	1895	21204	6809	2060	22050	6890	2263	22880	6824	2267	65534	65534	65534	2047	7361	10148	6781
2024-03-15	22593	6820	1894	21205	6803	2058	22057	6875	2259	22883	6814	2265	65534	65534	65534	2047	7361	10146	6786
2024-03-15 00:30:00	22591	6808	1894	21206	6792	2057	22059	6861	2261	22883	6807	2267	65534	65534	65534	2038	7287	10145	6802
2024-03-15 01:00:00	22590	6791	1894	21207	6779	2057	22064	6847	2262	22882	6791	2269	65534	65534	65534	2040	7302	10144	6790
2024-03-15 01:30:00	22589	6781	1895	21206	6769	2057	22069	6831	2262	22884	6786	2268	65534	65534	65534	2041	7306	10143	6782
2024-03-15 02:00:00	22586	6771	1893	21206	6764	2056	22068	6825	2261	22882	6780	2266	65534	65534	65534	2041	7310	10142	6794
2024-03-15 02:30:00	22588	6759	1892	21206	6756	2056	22067	6815	2258	22880	6775	2265	65534	65534	65534	2041	7311	10141	6795
2024-03-15 03:00:00	22579	6748	1893	21205	6747	2055	22071	6808	2258	22876	6769	2263	65534	65534	65534	2042	7314	10140	6788
2024-03-15 03:30:00	22578	6740	1892	21204	6742	2055	22071	6798	2255	22874	6760	2263	65534	65534	65534	2041	7310	10137	6789
2024-03-15 04:00:00	22575	6737	1892	21204	6736	2056	22066	6789	2254	22872	6758	2264	65534	65534	65534	2041	7311	10134	6788
2024-03-15 04:30:00	22573	6729	1890	21202	6731	2056	22067	6783	2253	22871	6749	2266	65534	65534	65534	2041	7311	10133	6785
2024-03-15 05:00:00	22567	6720	1891	21201	6725	2057	22064	6775	2251	22869	6740	2267	65534	65534	65534	2041	7309	10132	6787
2024-03-15 05:30:00	22564	6720	1891	21199	6725	2057	22064	6770	2251	22866	6739	2268	65534	65534	65534	2041	7305	10130	6795
2024-03-15 06:00:00	22556	6717	1891	21198	6717	2056	22060	6767	2253	22863	6730	2268	65534	65534	65534	2041	7306	10129	6791
2024-03-15 06:30:00	22549	6710	1891	21195	6716	2053	22058	6760	2252	22861	6730	2267	65534	65534	65534	2040	7304	10129	6794
2024-03-15 07:00:00	22546	6710	1891	21194	6713	2054	22054	6758	2250	22858	6720	2266	65534	65534	65534	2040	7304	10129	6791
2024-03-15 07:30:00	22536	6710	1891	21190	6713	2053	22052	6755	2249	22855	6722	2266	65534	65534	65534	2041	7305	10128	6820
2024-03-15 08:00:00	22513	6720	1889	21185	6720	2053	22045	6761	2250	22847	6726	2265	65534	65534	65534	2035	7259	10126	6854
2024-03-15 08:30:00	22489	6721	1887	21179	6721	2053	22035	6766	2247	22840	6724	2265	65534	65534	65534	2036	7268	10125	6859
2024-03-15 09:00:00	22458	6754	1883	21117	6813	2052	22016	6817	2244	22829	6741	2263	65534	65534	65534	2045	7342	10125	6983
2024-03-15 09:30:00	22407	6814	1881	20958	7157	2051	21982	6894	2239	22812	6771	2261	65534	65534	65534	2051	7395	10122	7182
2024-03-15 10:00:00	22341	6896	1876	20873	7494	2047	21942	6984	2238	22787	6826	2257	65534	65534	65534	2054	7419	10119	7399
2024-03-15 10:30:00	22266	6969	1874	20808	7738	2044	21899	7055	2237	22747	6887	2254	65534	65534	65534	2055	7422	10117	7592
2024-03-15 11:00:00	22191	7003	1870	20817	7691	2046	21863	7058	2235	22712	6895	2252	65534	65534	65534	2059	7457	10114	7601
2024-03-15 11:30:00	22116	7026	1869	20810	7664	2044	21835	7069	2229	22680	6899	2250	65534	65534	65534	2060	7467	10111	7636
2024-03-15 12:00:00	22050	7050	1867	20817	7640	2037	21800	7121	2223	22648	6924	2249	65534	65534	65534	2063	7491	10106	7670
2024-03-15 12:30:00	21971	7099	1863	20852	7596	2036	21746	7205	2220	22608	6975	2247	65534	65534	65534	2065	7512	10102	7741
2024-03-15 13:00:00	21893	7164	1858	20846	7607	2034	21695	7295	2216	22562	7037	2246	65534	65534	65534	2067	7523	10098	7820
2024-03-15 13:30:00	21815	7254	1852	20869	7585	2033	21635	7378	2210	22517	7086	2242	65534	65534	65534	2068	7533	10094	7869
2024-03-15 14:00:00	21745	7299	1851	20866	7587	2031	21568	7508	2202	22468	7143	2238	65534	65534	65534	2071	7558	10090	7958
2024-03-15 14:30:00	21684	7317	1848	20854	7619	2029	21495	7569	2197	22415	7205	2232	65534	65534	65534	2070	7551	10084	8037
2024-03-15 15:00:00	21618	7361	1845	20846	7651	2026	21416	7632	2192	22359	7265	2233	65534	65534	65534	2069	7540	10077	8087
2024-03-15 15:30:00	21546	7416	1840	20834	7674	2025	21347	7682	2186	22312	7317	2232	65534	65534	65534	2067	7530	10071	8101
2024-03-15 16:00:00	21472	7448	1837	20823	7687	2025	21300	7662	2183	22261	7365	2226	65534	65534	65534	2063	7496	10066	8138
2024-03-15 16:30:00	21404	7451	1832	20817	7684	2025	21256	7662	2178	22225	7355	2225	65534	65534	65534	2063	7493	10063	8163
2024-03-15 17:00:00	21356	7425	1831	20811	7656	2025	21198	7668	2175	22199	7334	2228	65534	65534	65534	2063	7491	10060	8187
2024-03-15 17:30:00	21319	7435	1827	20808	7653	2026	21138	7761	2169	22179	7365	2226	65534	65534	65534	2061	7477	10057	8134
2024-03-15 18:00:00	21277	7505	1823	20801	7719	2024	21090	7837	2163	22144	7445	2223	65534	65534	65534	2061	7475	10055	8100
2024-03-15 18:30:00	21244	7474	1824	20798	7664	2025	21078	7757	2164	22116	7416	2223	65534	65534	65534	2061	7473	10052	7945
2024-03-15 19:00:00	21234	7359	1826	20808	7509	2028	21081	7605	2161	22112	7305	2224	65534	65534	65534	2060	7468	10052	7700
2024-03-15 19:30:00	21241	7248	1828	20837	7352	2028	21099	7457	2157	22118	7203	2223	65534	65534	65534	2059	7461	10053	7485
2024-03-15 20:00:00	21253	7163	1827	20864	7233	2029	21123	7334	2151	22125	7121	2222	65534	65534	65534	2059	7460	10054	7328
2024-03-15 20:30:00	21262	7123	1827	20881	7171	2028	21134	7270	2150	22137	7079	2222	65534	65534	65534	2059	7456	10055	7215
2024-03-15 21:00:00	21276	7072	1827	20898	7096	2028	21150	7198	2144	22146	7031	2218	65534	65534	65534	2055	7423	10058	7098
2024-03-15 21:30:00	21291	7028	1829	20916	7035	2028	21161	7136	2145	22159	6993	2221	65534	65534	65534	2049	7378	10058	7008
2024-03-15 22:00:00	21305	6994	1829	20930	6987	2030	21170	7086	2141	22169	6963	2218	65534	65534	65534	2051	7394	10059	6944
2024-03-15 22:30:00	21319	6961	1830	20942	6942	2029	21182	7040	2141	22180	6938	2219	65534	65534	65534	2051	7395	10060	6882
2024-03-15 23:00:00	21331	6930	1830	20951	6897	2030	21190	6995	2136	22190	6909	2218	65534	65534	65534	2051	7394	10060	6824
2024-03-15 23:30:00	21343	6902	1831	20962	6859	2029	21199	6955	2136	22200	6883	2216	65534	65534	65534	2052	7398	10060	6791
2024-03-16	21349	6891	1831	20966	6847	2028	21204	6942	2136	22207	6876	2218	65534	65534	65534	2052	7397	10059	6796
2024-03-16 00:30:00	21356	6872	1832	20972	6822	2028	21208	6918	2135	22214	6861	2219	65534	65534	65534	2029	7204	10059	6812
2024-03-16 01:00:00	21362	6857	1831	20974	6811	2027	21214	6902	2134	22219	6845	2220	65534	65534	65534	2034	7251	10061	6802
2024-03-16 01:30:00	21366	6843	1832	20974	6799	2025	21217	6885	2133	22222	6833	2220	65534	65534	65534	2036	7264	10061	6797
2024-03-16 02:00:00	21373	6825	1832	20976	6786	2024	21219	6870	2131	22227	6819	2219	65534	65534	65534	2037	7274	10062	6792
2024-03-16 02:30:00	21375	6812	1833	20978	6776	2024	21221	6861	2128	22226	6809	2218	65534	65534	65534	2038	7281	10062	6794
2024-03-16 03:00:00	21379	6796	1833	20978	6764	2023	21219	6846	2125	22225	6798	2217	65534	65534	65534	2038	7283	10064	6784
2024-03-16 03:30:00	21381	6783	1833	20977	6757	2023	21218	6837	2125	22226	6789	2217	65534	65534	65534	2039	7289	10063	6789
2024-03-16 04:00:00	21382	6770	1833	20980	6747	2021	21216	6827	2127	22226	6780	2215	65534	65534	65534	2039	7289	10062	6786
2024-03-16 04:30:00	21382	6760	1833	20979	6743	2023	21215	6819	2126	22225	6771	2212	65534	65534	65534	2039	7292	10061	6790
2024-03-16 05:00:00	21384	6750	1832	20978	6736	2022	21214	6810	2127	22223	6766	2213	65534	65534	65534	2038	7286	10061	6790
2024-03-16 05:30:00	21381	6747	1833	20978	6736	2023	21212	6805	2125	22222	6760	2215	65534	65534	65534	2039	7288	10062	6793
2024-03-16 06:00:00	21379	6740	1834	20977	6735	2022	21210	6800	2124	22221	6758	2216	65534	65534	65534	2038	7287	10063	6796
2024-03-16 06:30:00	21376	6745	1833	20973	6744	2021	21207	6805	2122	22217	6756	2217	65534	65534	65534	2039	7289	10064	6835
2024-03-16 07:00:00	21362	6745	1832	20971	6731	2022	21203	6795	2123	22213	6753	2214	65534	65534	65534	2039	7289	10066	6835
2024-03-16 07:30:00	21343	6754	1827	20969	6735	2021	21198	6795	2120	22207	6755	2212	65534	65534	65534	2038	7286	10069	6847
2024-03-16 08:00:00	21327	6757	1827	20964	6737	2021	21194	6794	2120	22201	6752	2211	65534	65534	65534	2039	7289	10071	6849
2024-03-16 08:30:00	21310	6752	1825	20954	6747	2022	21188	6794	2118	22195	6745	2210	65534	65534	65534	2039	7290	10073	6861
2024-03-16 09:00:00	21279	6808	1821	20900	6874	2019	21167	6870	2114	22183	6782	2210	65534	65534	65534	2044	7330	10076	7050
2024-03-16 09:30:00	21223	6907	1815	20744	7252	2018	21135	6984	2109	22163	6845	2207	65534	65534	65534	2047	7360	10076	7328
2024-03-16 10:00:00	21162	6999	1811	20666	7597	2017	21094	7091	2110	22131	6917	2207	65534	65534	65534	2057	7440	10077	7538
2024-03-16 10:30:00	21099	7047	1807	20597	7772	2018	21064	7120	2111	22101	6949	2204	65534	65534	65534	2060	7472	10077	7672
2024-03-16 11:00:00	21033	7071	1802	20603	7717	2016	21042	7116	2109	22074	6950	2203	65534	65534	65534	2067	7530	10077	7666
2024-03-16 11:30:00	20971	7112	1795	20612	7702	2010	21020	7145	2104	22045	6967	2202	65534	65534	65534	2069	7545	10078	7734
2024-03-16 12:00:00	20919	7133	1792	20647	7636	2007	20987	7199	2099	22015	7000	2198	65534	65534	65534	2071	7563	10079	7755
2024-03-16 12:30:00	20859	7181	1785	20660	7599	2003	20953	7278	2095	21980	7050	2194	65534	65534	65534	2075	7593	10077	7815
2024-03-16 13:00:00	20797	7245	1775	20650	7634	2000	20911	7371	2088	21939	7113	2194	65534	65534	65534	2075	7597	10076	7914
2024-03-16 13:30:00	20738	7340	1767	20644	7653	1998	20871	7471	2083	21896	7178	2191	65534	65534	65534	2077	7615	10075	8005
2024-03-16 14:00:00	20690	7395	1763	20625	7692	1995	20821	7621	2073	21849	7250	2190	65534	65534	65534	2079	7628	10073	8130
2024-03-16 14:30:00	20642	7428	1757	20609	7732	1994	20764	7670	2069	21798	7324	2185	65534	65534	65534	2078	7621	10072	8219
2024-03-16 15:00:00	20591	7467	1751	20594	7761	1991	20711	7739	2066	21748	7378	2182	65534	65534	65534	2075	7594	10071	8294
2024-03-16 15:30:00	20535	7510	1743	20578	7783	1990	20665	7804	2060	21703	7424	2178	65534	65534	65534	2074	7586	10071	8303
2024-03-16 16:00:00	20479	7546	1733	20565	7800	1987	20633	7766	2060	21657	7457	2174	65534	65534	65534	2073	7580	10071	8325
2024-03-16 16:30:00	20431	7555	1725	20551	7796	1986	20602	7753	2055	21623	7448	2174	65534	65534	65534	2070	7555	10070	8348
2024-03-16 17:00:00	20393	7525	1723	20545	7773	1985	20566	7751	2053	21598	7427	2173	65534	65534	65534	2070	7555	10070	8353
2024-03-16 17:30:00	20364	7500	1716	20541	7738	1986	20530	7795	2047	21575	7425	2168	65534	65534	65534	2070	7549	10070	8229
2024-03-16 18:00:00	20339	7487	1713	20536	7702	1984	20508	7772	2043	21554	7408	2168	65534	65534	65534	2069	7545	10070	8050
2024-03-16 18:30:00	20321	7438	1708	20540	7630	1984	20504	7684	2041	21538	7363	2165	65534	65534	65534	2063	7497	10071	7898
2024-03-16 19:00:00	20313	7382	1707	20551	7541	1983	20504	7602	2039	21531	7312	2164	65534	65534	65534	2066	7517	10072	7755
2024-03-16 19:30:00	20305	7300	1703	20570	7416	1984	20511	7491	2033	21529	7245	2163	65534	65534	65534	2065	7514	10075	7566
2024-03-16 20:00:00	20308	7210	1701	20591	7284	1986	20526	7367	2031	21533	7167	2163	65534	65534	65534	2065	7512	10078	7369
2024-03-16 20:30:00	20310	7161	1698	20608	7201	1987	20534	7301	2025	21538	7121	2157	65534	65534	65534	2061	7479	10082	7227
2024-03-16 21:00:00	20315	7102	1698	20626	7113	1985	20545	7219	2024	21546	7069	2161	65534	65534	65534	2062	7484	10086	7083
2024-03-16 21:30:00	20326	7051	1698	20643	7045	1987	20556	7151	2022	21554	7025	2158	65534	65534	65534	2062	7486	10090	6991
2024-03-16 22:00:00	20329	7006	1698	20655	6988	1986	20563	7092	2019	21560	6987	2156	65534	65534	65534	2062	7485	10093	6917
2024-03-16 22:30:00	20341	6963	1697	20670	6931	1986	20573	7033	2016	21567	6947	2159	65534	65534	65534	2061	7479	10096	6849
2024-03-16 23:00:00	20344	6925	1697	20678	6884	1986	20581	6984	2015	21574	6912	2159	65534	65534	65534	2061	7480	10100	6806
2024-03-16 23:30:00	20353	6897	1694	20686	6861	1984	20584	6954	2013	21579	6890	2154	65534	65534	65534	2061	7479	10103	6791
2024-03-17	20357	6872	1693	20690	6839	1982	20588	6931	2009	21582	6867	2154	65534	65534	65534	2061	7477	10105	6786
2024-03-17 00:30:00	20359	6851	1696	20696	6824	1983	20593	6911	2008	21585	6847	2157	65534	65534	65534	2054	7415	10108	6802
2024-03-17 01:00:00	20363	6836	1690	20699	6809	1981	20593	6897	2005	21587	6836	2155	65534	65534	65534	2055	7428	10111	6790
2024-03-17 01:30:00	20366	6818	1692	20700	6803	1980	20595	6880	2004	21589	6826	2154	65534	65534	65534	2056	7432	10115	6791
2024-03-17 02:00:00	20365	6807	1691	20700	6792	1981	20597	6868	2002	21590	6810	2153	65534	65534	65534	2056	7435	10119	6793
2024-03-17 02:30:00	20369	6795	1690	20703	6787	1980	20595	6857	2002	21591	6805	2153	65534	65534	65534	2056	7435	10122	6795
2024-03-17 03:00:00	20368	6779	1690	20701	6777	1980	20595	6847	2000	21590	6789	2152	65534	65534	65534	2056	7436	10122	6792
2024-03-17 03:30:00	20370	6777	1690	20702	6776	1981	20594	6842	2000	21589	6788	2152	65534	65534	65534	2057	7439	10123	6804
2024-03-17 04:00:00	20372	6766	1691	20704	6765	1980	20594	6828	2000	21589	6778	2151	65534	65534	65534	2056	7437	10125	6791
2024-03-17 04:30:00	20371	6757	1690	20699	6763	1981	20591	6825	2000	21586	6773	2150	65534	65534	65534	2056	7437	10125	6797
2024-03-17 05:00:00	20371	6747	1690	20698	6756	1982	20591	6816	1999	21585	6766	2150	65534	65534	65534	2056	7433	10126	6790
2024-03-17 05:30:00	20368	6740	1690	20698	6747	1982	20589	6807	1998	21582	6756	2150	65534	65534	65534	2056	7434	10128	6791
2024-03-17 06:00:00	20371	6736	1690	20695	6747	1980	20586	6805	1996	21581	6754	2150	65534	65534	65534	2056	7434	10131	6798
2024-03-17 06:30:00	20367	6739	1690	20696	6750	1980	20585	6803	1996	21578	6754	2149	65534	65534	65534	2054	7420	10134	6820
2024-03-17 07:00:00	20356	6744	1688	20695	6756	1981	20582	6800	1995	21574	6754	2146	65534	65534	65534	2055	7428	10137	6848
2024-03-17 07:30:00	20347	6744	1685	20691	6752	1980	20580	6794	1995	21568	6749	2142	65534	65534	65534	2055	7427	10139	6844
2024-03-17 08:00:00	20336	6744	1682	20690	6754	1981	20575	6794	1992	21563	6746	2143	65534	65534	65534	2055	7425	10141	6852
2024-03-17 08:30:00	20318	6758	1681	20679	6781	1979	20571	6808	1991	21557	6750	2142	65534	65534	65534	2055	7430	10142	6882
2024-03-17 09:00:00	20297	6816	1676	20626	6908	1980	20557	6883	1988	21548	6788	2141	65534	65534	65534	2067	7526	10142	7085
2024-03-17 09:30:00	20259	6926	1667	20499	7275	1979	20535	7007	1984	21526	6880	2140	65534	65534	65534	2068	7539	10143	7390
2024-03-17 10:00:00	20221	7019	1663	20433	7625	1974	20508	7110	1984	21504	6940	2139	65534	65534	65534	2079	7627	10143	7587
2024-03-17 10:30:00	20182	7072	1662	20369	7823	1974	20488	7140	1986	21479	6965	2137	65534	65534	65534	2076	7603	10143	7704
2024-03-17 11:00:00	20147	7099	1658	20365	7815	1967	20471	7122	1987	21460	6961	2138	65534	65534	65534	2081	7645	10143	7680
2024-03-17 11:30:00	20112	7122	1653	20350	7878	1958	20462	7136	1983	21442	6964	2137	65534	65534	65534	2084	7671	10141	7726
2024-03-17 12:00:00	20083	7126	1650	20353	7827	1958	20445	7179	1981	21423	6984	2135	65534	65534	65534	2086	7683	10139	7723
2024-03-17 12:30:00	20052	7171	1643	20354	7750	1954	20421	7251	1977	21401	7027	2132	65534	65534	65534	2087	7696	10136	7767
2024-03-17 13:00:00	20015	7220	1641	20339	7777	1949	20399	7329	1974	21374	7076	2126	65534	65534	65534	2088	7700	10133	7840
2024-03-17 13:30:00	24060	6958	1958	21373	7571	2145	22309	7200	2286	23396	7033	2316	65534	65534	65534	2090	7720	10130	7911
2024-03-17 14:00:00	23968	6925	1927	21221	7539	2099	22756	7163	2292	24021	6926	2324	65534	65534	65534	2091	7725	10126	8026
2024-03-17 14:30:00	23592	7032	1899	21107	7601	2067	22415	7334	2246	23687	6978	2291	65534	65534	65534	2090	7716	10122	8123
2024-03-17 15:00:00	23340	7139	1883	21028	7621	2050	22166	7475	2220	23442	7059	2271	65534	65534	65534	2088	7706	10119	8181
2024-03-17 15:30:00	23141	7229	1874	20965	7646	2036	21971	7585	2198	23249	7141	2258	65534	65534	65534	2087	7697	10115	8178
2024-03-17 16:00:00	22968	7290	1869	20918	7663	2027	21846	7582	2188	23097	7205	2245	65534	65534	65534	2087	7692	10113	8186
2024-03-17 16:30:00	22833	7344	1863	20880	7672	2018	21735	7605	2177	22978	7218	2239	65534	65534	65534	2086	7685	10110	8223
2024-03-17 17:00:00	22728	7366	1863	20850	7686	2012	21623	7633	2167	22886	7230	2234	65534	65534	65534	2085	7681	10108	8262
2024-03-17 17:30:00	22657	7375	1862	20825	7651	2006	21518	7685	2157	22810	7256	2227	65534	65534	65534	2085	7674	10106	8153
2024-03-17 18:00:00	22599	7373	1862	20808	7618	2002	21448	7688	2149	22739	7257	2222	65534	65534	65534	2084	7672	10105	7995
2024-03-17 18:30:00	22566	7344	1863	20795	7556	1999	21418	7621	2143	22683	7233	2219	65534	65534	65534	2084	7666	10105	7857
2024-03-17 19:00:00	22544	7304	1863	20796	7477	1996	21400	7554	2137	22641	7203	2214	65534	65534	65534	2083	7662	10106	7710
2024-03-17 19:30:00	22542	7247	1864	20807	7370	1994	21392	7458	2133	22609	7161	2214	65534	65534	65534	2083	7659	10107	7547
2024-03-17 20:00:00	22552	7175	1867	20823	7251	1991	21402	7344	2128	22591	7105	2210	65534	65534	65534	2082	7654	10109	7380
2024-03-17 20:30:00	22564	7130	1869	20833	7167	1990	21407	7277	2125	22581	7064	2210	65534	65534	65534	2082	7651	10110	7235
2024-03-17 21:00:00	22571	7086	1869	20847	7079	1990	21417	7207	2122	22573	7025	2207	65534	65534	65534	2082	7650	10110	7083
2024-03-17 21:30:00	22591	7038	1869	20860	7001	1989	21424	7134	2119	22568	6985	2207	65534	65534	65534	2081	7648	10112	6963
2024-03-17 22:00:00	22603	6991	1868	20874	6935	1988	21436	7066	2117	22567	6944	2207	65534	65534	65534	2081	7646	10113	6870
2024-03-17 22:30:00	22614	6950	1868	20883	6882	1987	21438	7009	2111	22568	6906	2202	65534	65534	65534	2078	7619	10115	6810
2024-03-17 23:00:00	22619	6926	1866	20887	6863	1986	21445	6983	2109	22563	6887	2202	65534	65534	65534	2079	7624	10116	6804
2024-03-17 23:30:00	22628	6901	1865	20891	6839	1983	21444	6957	2109	22558	6871	2201	65534	65534	65534	2079	7627	10118	6788
2024-03-18	22634	6882	1866	20893	6821	1982	21447	6936	2106	22554	6854	2200	65534	65534	65534	2079	7625	10118	6784
2024-03-18 00:30:00	22626	6863	1868	20896	6810	1980	21444	6922	2104	22547	6841	2198	65534	65534	65534	2074	7583	10119	6802
2024-03-18 01:00:00	22630	6851	1868	20896	6798	1979	21441	6904	2101	22540	6825	2198	65534	65534	65534	2075	7590	10119	6792
2024-03-18 01:30:00	22630	6837	1869	20895	6790	1978	21437	6892	2099	22534	6815	2198	65534	65534	65534	2075	7590	10120	6795
2024-03-18 02:00:00	22625	6823	1868	20895	6782	1978	21431	6882	2097	22528	6805	2196	65534	65534	65534	2075	7593	10121	6791
2024-03-18 02:30:00	22625	6813	1867	20895	6773	1977	21425	6869	2095	22519	6796	2193	65534	65534	65534	2075	7593	10120	6789
2024-03-18 03:00:00	22622	6804	1866	20894	6766	1977	21421	6862	2093	22514	6790	2189	65534	65534	65534	2075	7594	10120	6794
2024-03-18 03:30:00	22618	6795	1866	20891	6761	1977	21417	6850	2092	22503	6783	2188	65534	65534	65534	2075	7593	10121	6782
2024-03-18 04:00:00	22618	6785	1864	20888	6756	1976	21412	6839	2090	22498	6776	2190	65534	65534	65534	2075	7595	10119	6787
2024-03-18 04:30:00	22613	6777	1865	20886	6750	1974	21404	6833	2089	22489	6767	2192	65534	65534	65534	2075	7591	10119	6785
2024-03-18 05:00:00	22609	6767	1864	20884	6745	1973	21396	6824	2086	22483	6759	2191	65534	65534	65534	2075	7593	10119	6781
2024-03-18 05:30:00	22605	6759	1863	20882	6741	1973	21392	6814	2086	22477	6753	2192	65534	65534	65534	2075	7590	10120	6776
2024-03-18 06:00:00	22602	6754	1863	20880	6743	1973	21387	6813	2084	22469	6752	2189	65534	65534	65534	2075	7592	10122	6787
2024-03-18 06:30:00	22589	6754	1863	20876	6745	1973	21381	6815	2083	22462	6754	2189	65534	65534	65534	2074	7587	10121	6818
2024-03-18 07:00:00	22574	6755	1859	20874	6745	1973	21372	6811	2083	22450	6752	2189	65534	65534	65534	2074	7587	10122	6827
2024-03-18 07:30:00	22549	6755	1858	20868	6744	1972	21363	6803	2081	22438	6747	2187	65534	65534	65534	2074	7588	10123	6832
2024-03-18 08:00:00	22523	6757	1857	20863	6746	1971	21353	6800	2080	22427	6746	2187	65534	65534	65534	2074	7587	10124	6835
2024-03-18 08:30:00	22497	6759	1855	20852	6769	1969	21343	6810	2076	22417	6744	2185	65534	65534	65534	2075	7594	10126	6875
2024-03-18 09:00:00	22451	6809	1850	20808	6880	1968	21319	6883	2072	22401	6779	2184	65534	65534	65534	2083	7660	10126	7064
2024-03-18 09:30:00	22377	6904	1844	20727	7187	1965	21277	7002	2068	22371	6857	2182	65534	65534	65534	2085	7679	10126	7374
2024-03-18 10:00:00	22294	6989	1841	20661	7459	1960	21230	7103	2065	22336	6919	2174	65534	65534	65534	2092	7736	10126	7566
2024-03-18 10:30:00	22211	7036	1837	20582	7640	1959	21192	7130	2064	22304	6949	2174	65534	65534	65534	2092	7735	10125	7691
2024-03-18 11:00:00	22121	7067	1832	20583	7653	1955	21157	7134	2061	22264	6961	2171	65534	65534	65534	2094	7754	10123	7696
2024-03-18 11:30:00	22034	7104	1827	20597	7687	1944	21124	7169	2056	22229	6985	2170	65534	65534	65534	2096	7774	10121	7776
2024-03-18 12:00:00	21960	7130	1823	20587	7685	1942	21082	7220	2049	22195	7017	2174	65534	65534	65534	2097	7776	10117	7800
2024-03-18 12:30:00	21878	7176	1819	20566	7670	1941	21036	7301	2044	22156	7067	2173	65534	65534	65534	2097	7778	10115	7854
2024-03-18 13:00:00	21786	7237	1812	20538	7724	1937	20985	7387	2038	22109	7128	2170	65534	65534	65534	2097	7782	10112	7933
2024-03-18 13:30:00	21701	7298	1805	20525	7675	1934	20927	7464	2033	22062	7185	2164	65534	65534	65534	2099	7799	10109	8000
2024-03-18 14:00:00	21621	7348	1800	20515	7666	1931	20875	7543	2026	22015	7248	2161	65534	65534	65534	2100	7802	10106	8113
2024-03-18 14:30:00	21547	7397	1795	20499	7690	1929	20816	7626	2019	21964	7314	2160	65534	65534	65534	2099	7798	10102	8213
2024-03-18 15:00:00	21477	7445	1792	20481	7713	1925	20754	7701	2014	21914	7371	2157	65534	65534	65534	2098	7786	10098	8284
2024-03-18 15:30:00	21398	7490	1784	20458	7723	1920	20702	7757	2008	21861	7420	2157	65534	65534	65534	2097	7777	10094	8259
2024-03-18 16:00:00	21311	7521	1775	20443	7740	1916	20658	7730	2003	21813	7452	2154	65534	65534	65534	2096	7772	10091	8232
2024-03-18 16:30:00	21234	7541	1770	20426	7750	1913	20615	7767	1997	21773	7468	2153	65534	65534	65534	2096	7767	10088	8231
2024-03-18 17:00:00	21169	7536	1766	20413	7737	1911	20574	7821	1994	21736	7470	2151	65534	65534	65534	2095	7763	10085	8216
2024-03-18 17:30:00	21111	7534	1761	20405	7729	1908	20518	7908	1988	21706	7478	2147	65534	65534	65534	2095	7762	10081	8139
2024-03-18 18:00:00	21067	7525	1755	20400	7704	1906	20487	7882	1987	21678	7471	2145	65534	65534	65534	2094	7754	10079	8027
2024-03-18 18:30:00	21033	7495	1753	20399	7652	1906	20475	7784	1982	21657	7437	2143	65534	65534	65534	2094	7751	10078	7913
2024-03-18 19:00:00	21012	7447	1751	20405	7574	1906	20475	7695	1980	21646	7393	2146	65534	65534	65534	2093	7748	10078	7772
2024-03-18 19:30:00	21005	7377	1748	20417	7468	1903	20483	7572	1975	21640	7335	2139	65534	65534	65534	2093	7745	10078	7615
2024-03-18 20:00:00	21009	7294	1748	20433	7351	1903	20496	7446	1971	21642	7265	2141	65534	65534	65534	2093	7742	10080	7448
2024-03-18 20:30:00	21021	7203	1748	20450	7239	1903	20511	7338	1968	21648	7190	2138	65534	65534	65534	2092	7740	10081	7274
2024-03-18 21:00:00	21033	7149	1748	20463	7166	1901	20519	7277	1964	21653	7148	2140	65534	65534	65534	2092	7739	10083	7149
2024-03-18 21:30:00	21046	7102	1752	20479	7099	1901	20531	7214	1961	21656	7108	2139	65534	65534	65534	2092	7736	10083	7052
2024-03-18 22:00:00	21057	7058	1753	20492	7039	1898	20540	7154	1958	21662	7067	2134	65534	65534	65534	2092	7733	10085	6976
2024-03-18 22:30:00	21070	7016	1752	20497	6988	1897	20546	7101	1954	21667	7028	2137	65534	65534	65534	2091	7731	10085	6916
2024-03-18 23:00:00	21084	6973	1753	20507	6940	1899	20554	7049	1948	21673	6991	2137	65534	65534	65534	2091	7731	10086	6858
2024-03-18 23:30:00	21097	6935	1755	20513	6893	1901	20562	7000	1949	21680	6953	2136	65534	65534	65534	2091	7727	10088	6805
2024-03-19	21108	6908	1754	20519	6861	1899	20568	6964	1946	21684	6925	2133	65534	65534	65534	2091	7729	10088	6788
2024-03-19 00:30:00	21115	6886	1754	20529	6844	1898	20570	6944	1944	21685	6907	2134	65534	65534	65534	2090	7720	10088	6789
2024-03-19 01:00:00	21122	6871	1755	20526	6831	1897	20569	6924	1941	21687	6892	2132	65534	65534	65534	2090	7718	10089	6786
2024-03-19 01:30:00	21127	6858	1755	20531	6826	1897	20574	6913	1940	21687	6879	2128	65534	65534	65534	2090	7719	10090	6800
2024-03-19 02:00:00	21132	6841	1756	20531	6816	1897	20573	6900	1939	21687	6864	2129	65534	65534	65534	2090	7718	10090	6797
2024-03-19 02:30:00	21134	6825	1755	20534	6799	1898	20574	6882	1937	21688	6850	2130	65534	65534	65534	2090	7717	10089	6784
2024-03-19 03:00:00	21136	6814	1756	20532	6793	1898	20577	6867	1936	21688	6837	2129	65534	65534	65534	2090	7718	10088	6786
2024-03-19 03:30:00	21139	6808	1756	20535	6789	1897	20578	6861	1935	21685	6834	2127	65534	65534	65534	2090	7717	10088	6792
2024-03-19 04:00:00	21138	6800	1756	20535	6782	1898	20573	6850	1935	21685	6823	2127	65534	65534	65534	2090	7716	10087	6790
2024-03-19 04:30:00	21140	6794	1756	20534	6775	1897	20571	6844	1934	21681	6816	2128	65534	65534	65534	2089	7711	10086	6790
2024-03-19 05:00:00	21138	6782	1755	20534	6768	1897	20572	6833	1933	21680	6810	2126	65534	65534	65534	2089	7714	10086	6793
2024-03-19 05:30:00	21138	6774	1756	20533	6763	1897	20569	6825	1932	21677	6803	2127	65534	65534	65534	2089	7713	10087	6795
2024-03-19 06:00:00	21134	6766	1756	20534	6759	1896	20568	6820	1930	21674	6795	2123	65534	65534	65534	2089	7712	10087	6797
2024-03-19 06:30:00	21132	6767	1754	20531	6760	1895	20564	6818	1929	21672	6796	2122	65534	65534	65534	2089	7710	10088	6809
2024-03-19 07:00:00	21120	6770	1752	20531	6760	1894	20564	6819	1927	21669	6790	2122	65534	65534	65534	2089	7710	10088	6818
2024-03-19 07:30:00	21104	6762	1749	20530	6746	1895	20558	6805	1929	21666	6782	2123	65534	65534	65534	2089	7709	10088	6801
2024-03-19 08:00:00	21084	6770	1748	20524	6759	1894	20556	6810	1925	21660	6780	2122	65534	65534	65534	2089	7709	10089	6823
2024-03-19 08:30:00	21065	6767	1745	20517	6776	1894	20551	6819	1924	21655	6776	2123	65534	65534	65534	2089	7711	10091	6853
2024-03-19 09:00:00	21028	6838	1739	20477	6914	1892	20534	6910	1921	21645	6815	2120	65534	65534	65534	2095	7763	10091	7086
2024-03-19 09:30:00	20969	6950	1731	20366	7264	1893	20503	7045	1919	21623	6890	2117	65534	65534	65534	2099	7795	10089	7411
2024-03-19 10:00:00	20900	7058	1723	20308	7634	1892	20473	7153	1917	21598	6962	2117	65534	65534	65534	2100	7831	10089	7631
2024-03-19 10:30:00	20826	7109	1716	20243	7809	1890	20450	7174	1919	21574	6988	2117	65534	65534	65534	2100	7825	10089	7723
2024-03-19 11:00:00	20766	7122	1707	20234	7811	1887	20433	7155	1919	21556	6984	2117	65534	65534	65534	2100	7840	10090	7672
2024-03-19 11:30:00	21511	7140	1761	20629	7809	1968	20562	7154	1957	21538	6980	2116	65534	65534	65534	2100	7859	10089	7705
2024-03-19 12:00:00	23749	7089	1947	21519	7659	2117	22434	7110	2206	21998	6978	2178	65534	65534	65534	2100	7865	10089	7669
2024-03-19 12:30:00	23008	7064	1895	21312	7544	2065	22010	7130	2130	22310	6983	2215	65534	65534	65534	2100	7865	10088	7670
2024-03-19 13:00:00	22616	7096	1861	21207	7444	2033	21790	7196	2096	22341	7005	2216	65534	65534	65534	2100	7868	10087	7687
2024-03-19 13:30:00	22338	7110	1838	21136	7400	2009	21627	7255	2077	22320	7032	2215	65534	65534	65534	2100	7884	10086	7720
2024-03-19 14:00:00	22154	7137	1817	21072	7400	1990	21493	7315	2059	22282	7072	2214	65534	65534	65534	2100	7887	10085	7803
2024-03-19 14:30:00	21993	7160	1802	21017	7400	1976	21362	7384	2043	22239	7111	2210	65534	65534	65534	2100	7881	10082	7854
2024-03-19 15:00:00	21854	7181	1788	20976	7400	1965	21231	7514	2028	22193	7142	2208	65534	65534	65534	2100	7875	10080	7870
2024-03-19 15:30:00	21726	7203	1774	20941	7400	1956	21110	7605	2017	22148	7162	2205	65534	65534	65534	2100	7866	10077	7809
2024-03-19 16:00:00	21604	7210	1759	20912	7393	1948	21035	7507	2011	22107	7166	2200	65534	65534	65534	2100	7859	10076	7752
2024-03-19 16:30:00	21500	7216	1745	20889	7369	1940	20977	7468	2004	22071	7145	2200	65534	65534	65534	2100	7854	10075	7717
2024-03-19 17:00:00	21419	7170	1736	20870	7331	1935	20913	7468	1997	22048	7108	2198	65534	65534	65534	2100	7850	10074	7651
2024-03-19 17:30:00	21361	7108	1729	20857	7282	1931	20841	7513	1988	22032	7072	2196	65534	65534	65534	2100	7847	10074	7522
2024-03-19 18:00:00	21313	7059	1722	20846	7230	1926	20797	7459	1980	22021	7028	2194	65534	65534	65534	2100	7846	10074	7387
2024-03-19 18:30:00	21271	7033	1715	20837	7187	1922	20778	7377	1977	22013	6997	2193	65534	65534	65534	2100	7840	10074	7301
2024-03-19 19:00:00	21235	7024	1708	20833	7151	1919	20767	7353	1969	22003	6986	2191	65534	65534	65534	2100	7840	10073	7229
2024-03-19 19:30:00	21208	6984	1706	20837	7076	1915	20761	7260	1966	21997	6960	2190	65534	65534	65534	2100	7837	10074	7121
2024-03-19 20:00:00	21191	6951	1702	20841	7009	1913	20766	7173	1962	21992	6944	2189	65534	65534	65534	2100	7833	10075	7032
2024-03-19 20:30:00	21178	6916	1701	20846	6944	1912	20769	7096	1957	21989	6920	2191	65534	65534	65534	2100	7832	10078	6926
2024-03-19 21:00:00	21178	6870	1699	20852	6882	1905	20774	7021	1953	21989	6883	2192	65534	65534	65534	2100	7830	10079	6842
2024-03-19 21:30:00	21174	6844	1696	20854	6855	1907	20777	6976	1949	21990	6862	2188	65534	65534	65534	2100	7830	10082	6811
2024-03-19 22:00:00	21170	6824	1693	20855	6833	1907	20775	6944	1946	21988	6844	2183	65534	65534	65534	2100	7828	10085	6794
2024-03-19 22:30:00	21168	6805	1691	20856	6812	1905	20773	6917	1942	21987	6826	2185	65534	65534	65534	2100	7824	10088	6784
2024-03-19 23:00:00	21163	6794	1690	20854	6804	1903	20771	6898	1939	21982	6816	2187	65534	65534	65534	2100	7824	10089	6790
2024-03-19 23:30:00	21160	6787	1689	20852	6796	1903	20765	6884	1936	21979	6808	2184	65534	65534	65534	2100	7824	10090	6788
2024-03-20	21155	6775	1688	20850	6788	1902	20761	6867	1934	21977	6800	2184	65534	65534	65534	2100	7821	10090	6788
2024-03-20 00:30:00	21148	6775	1686	20848	6790	1901	20753	6862	1931	21973	6796	2184	65534	65534	65534	2099	7798	10090	6818
2024-03-20 01:00:00	21144	6769	1682	20843	6786	1898	20749	6850	1928	21969	6789	2182	65534	65534	65534	2100	7802	10089	6811
2024-03-20 01:30:00	21136	6760	1683	20843	6776	1899	20743	6840	1925	21967	6780	2180	65534	65534	65534	2100	7806	10088	6799
2024-03-20 02:00:00	21132	6753	1682	20838	6764	1898	20736	6827	1924	21963	6772	2178	65534	65534	65534	2100	7802	10088	6782
2024-03-20 02:30:00	21123	6747	1682	20836	6764	1898	20727	6822	1923	21960	6767	2179	65534	65534	65534	2100	7801	10088	6791
2024-03-20 03:00:00	21117	6740	1681	20831	6762	1898	20721	6817	1920	21956	6760	2180	65534	65534	65534	2100	7802	10089	6798
2024-03-20 03:30:00	21110	6740	1680	20827	6757	1897	20713	6810	1918	21951	6760	2180	65534	65534	65534	2100	7800	10089	6795
2024-03-20 04:00:00	21097	6737	1679	20825	6757	1898	20707	6807	1917	21946	6758	2181	65534	65534	65534	2100	7802	10088	6794
2024-03-20 04:30:00	21088	6730	1678	20823	6751	1897	20700	6800	1915	21941	6750	2179	65534	65534	65534	2100	7800	10088	6794
2024-03-20 05:00:00	21078	6730	1673	20818	6747	1895	20694	6790	1914	21937	6747	2179	65534	65534	65534	2099	7798	10087	6788
2024-03-20 05:30:00	21071	6722	1675	20814	6739	1896	20686	6785	1911	21933	6741	2179	65534	65534	65534	2099	7798	10086	6779
2024-03-20 06:00:00	21059	6720	1672	20813	6741	1895	20678	6787	1908	21928	6740	2178	65534	65534	65534	2099	7796	10085	6794
2024-03-20 06:30:00	21044	6727	1671	20808	6748	1893	20670	6788	1907	21922	6740	2177	65534	65534	65534	2099	7797	10084	6809
2024-03-20 07:00:00	21015	6740	1664	20800	6760	1892	20662	6800	1903	21915	6750	2176	65534	65534	65534	2099	7795	10083	6824
2024-03-20 07:30:00	20982	6739	1661	20796	6753	1892	20655	6795	1901	21907	6745	2176	65534	65534	65534	2099	7792	10083	6813
2024-03-20 08:00:00	20955	6730	1654	20795	6740	1892	20645	6785	1899	21900	6736	2176	65534	65534	65534	2099	7794	10084	6794
2024-03-20 08:30:00	20926	6739	1648	20787	6755	1892	20635	6792	1900	21893	6737	2174	65534	65534	65534	2099	7792	10083	6830
2024-03-20 09:00:00	20886	6781	1643	20771	6813	1889	20621	6838	1895	21880	6767	2173	65534	65534	65534	2099	7793	10083	6928
2024-03-20 09:30:00	20842	6845	1635	20752	6900	1886	20597	6910	1890	21861	6820	2170	65534	65534	65534	2097	7776	10082	7065
2024-03-20 10:00:00	20800	6896	1629	20732	6958	1886	20575	6961	1890	21839	6860	2170	65534	65534	65534	2098	7785	10081	7123
2024-03-20 10:30:00	20756	6950	1623	20708	7039	1886	20547	7025	1889	21817	6905	2166	65534	65534	65534	2098	7791	10080	7224
2024-03-20 11:00:00	20702	6990	1614	20680	7105	1883	20520	7074	1887	21795	6938	2167	65534	65534	65534	2100	7802	10079	7300
2024-03-20 11:30:00	20649	7030	1610	20654	7169	1881	20492	7119	1884	21771	6966	2167	65534	65534	65534	2100	7804	10078	7376
2024-03-20 12:00:00	20595	7072	1602	20636	7218	1880	20466	7163	1883	21747	7000	2166	65534	65534	65534	2100	7812	10078	7434
2024-03-20 12:30:00	20546	7090	1596	20617	7247	1880	20441	7181	1881	21725	7015	2165	65534	65534	65534	2100	7817	10077	7455
2024-03-20 13:00:00	20494	7092	1591	20601	7266	1876	20415	7197	1878	21704	7020	2164	65534	65534	65534	2100	7824	10075	7486
2024-03-20 13:30:00	20447	7101	1582	20585	7271	1874	20391	7214	1875	21683	7026	2162	65534	65534	65534	2100	7824	10074	7506
2024-03-20 14:00:00	20404	7104	1573	20566	7288	1868	20366	7230	1869	21660	7031	2159	65534	65534	65534	2100	7827	10071	7527
2024-03-20 14:30:00	20361	7106	1567	20553	7280	1868	20345	7236	1865	21638	7035	2156	65534	65534	65534	2100	7831	10068	7518
2024-03-20 15:00:00	20323	7118	1557	20544	7272	1865	20325	7238	1862	21619	7043	2153	65534	65534	65534	2100	7830	10068	7491
2024-03-20 15:30:00	20288	7113	1556	20539	7242	1864	20310	7232	1858	21600	7047	2151	65534	65534	65534	2100	7830	10067	7444
2024-03-20 16:00:00	20257	7120	1552	20531	7239	1861	20292	7240	1856	21585	7058	2150	65534	65534	65534	2100	7828	10067	7435
2024-03-20 16:30:00	20229	7109	1544	20527	7219	1858	20278	7229	1857	21570	7054	2151	65534	65534	65534	2100	7829	10069	7385
2024-03-20 17:00:00	20203	7089	1542	20523	7190	1857	20270	7207	1854	21561	7044	2152	65534	65534	65534	2100	7813	10069	7342
2024-03-20 17:30:00	20183	7078	1536	20520	7165	1853	20266	7188	1852	21552	7037	2152	65534	65534	65534	2100	7811	10069	7299
2024-03-20 18:00:00	20166	7053	1531	20520	7126	1852	20258	7162	1851	21546	7021	2151	65534	65534	65534	2100	7810	10070	7244
2024-03-20 18:30:00	20153	7015	1528	20524	7079	1851	20257	7123	1851	21542	6991	2150	65534	65534	65534	2100	7810	10071	7184
2024-03-20 19:00:00	20143	6989	1523	20528	7039	1850	20253	7090	1849	21539	6970	2146	65534	65534	65534	2100	7808	10071	7136
2024-03-20 19:30:00	20134	6961	1520	20530	6995	1848	20253	7054	1846	21536	6947	2146	65534	65534	65534	2100	7805	10072	7078
2024-03-20 20:00:00	20125	6934	1519	20534	6954	1846	20252	7017	1845	21534	6923	2146	65534	65534	65534	2100	7805	10073	7027
2024-03-20 20:30:00	20122	6916	1519	20537	6929	1845	20254	6986	1845	21531	6904	2144	65534	65534	65534	2100	7803	10076	6973
2024-03-20 21:00:00	20122	6875	1519	20539	6880	1845	20255	6936	1844	21533	6872	2146	65534	65534	65534	2100	7802	10079	6878
2024-03-20 21:30:00	20121	6836	1519	20545	6832	1845	20259	6889	1842	21536	6837	2145	65534	65534	65534	2099	7798	10080	6810
2024-03-20 22:00:00	20120	6807	1515	20550	6799	1845	20258	6855	1839	21538	6809	2144	65534	65534	65534	2099	7797	10080	6774
2024-03-20 22:30:00	20120	6804	1515	20550	6798	1843	20264	6849	1839	21538	6800	2142	65534	65534	65534	2099	7795	10081	6802
2024-03-20 23:00:00	20119	6792	1506	20551	6787	1840	20262	6833	1838	21537	6791	2137	65534	65534	65534	2099	7797	10081	6791
2024-03-20 23:30:00	20118	6786	1506	20550	6783	1842	20260	6826	1835	21536	6785	2138	65534	65534	65534	2099	7795	10081	6792
2024-03-21	20120	6778	1505	20550	6776	1842	20262	6814	1833	21534	6780	2138	65534	65534	65534	2099	7795	10082	6789
2024-03-21 00:30:00	20118	6770	1506	20550	6767	1839	20260	6806	1833	21535	6770	2139	65534	65534	65534	2098	7788	10082	6792
2024-03-21 01:00:00	20116	6763	1504	20549	6762	1839	20259	6795	1833	21531	6763	2138	65534	65534	65534	2098	7786	10083	6785
2024-03-21 01:30:00	20113	6757	1505	20549	6753	1840	20257	6790	1832	21528	6758	2137	65534	65534	65534	2098	7786	10084	6779
2024-03-21 02:00:00	20111	6757	1505	20546	6755	1841	20256	6786	1833	21527	6757	2135	65534	65534	65534	2098	7788	10084	6786
2024-03-21 02:30:00	20108	6751	1504	20549	6747	1839	20254	6779	1832	21524	6750	2137	65534	65534	65534	2098	7786	10085	6775
2024-03-21 03:00:00	20107	6749	1504	20545	6751	1839	20252	6778	1831	21519	6750	2135	65534	65534	65534	2098	7785	10085	6786
2024-03-21 03:30:00	20106	6749	1500	20542	6751	1839	20250	6776	1828	21515	6740	2136	65534	65534	65534	2098	7785	10086	6794
2024-03-21 04:00:00	20101	6746	1498	20541	6748	1839	20248	6770	1827	21515	6740	2137	65534	65534	65534	2097	7783	10087	6792
2024-03-21 04:30:00	20097	6743	1500	20540	6743	1839	20242	6764	1826	21510	6736	2137	65534	65534	65534	2097	7783	10087	6788
2024-03-21 05:00:00	20093	6742	1501	20538	6743	1839	20241	6762	1826	21508	6733	2135	65534	65534	65534	2097	7780	10087	6787
2024-03-21 05:30:00	20089	6744	1502	20537	6746	1839	20238	6759	1825	21504	6736	2134	65534	65534	65534	2097	7778	10088	6790
2024-03-21 06:00:00	20086	6740	1499	20536	6744	1839	20233	6759	1824	21501	6730	2134	65534	65534	65534	2097	7777	10089	6793
2024-03-21 06:30:00	20079	6744	1498	20534	6750	1839	20231	6759	1821	21496	6733	2133	65534	65534	65534	2097	7779	10089	6810
2024-03-21 07:00:00	20063	6758	1493	20528	6763	1839	20225	6771	1820	21491	6740	2132	65534	65534	65534	2097	7778	10090	6830
2024-03-21 07:30:00	20047	6744	1492	20532	6743	1839	20220	6755	1821	21484	6733	2130	65534	65534	65534	2097	7776	10092	6794
2024-03-21 08:00:00	20031	6755	1490	20524	6760	1839	20216	6762	1820	21479	6734	2128	65534	65534	65534	2097	7776	10094	6822
2024-03-21 08:30:00	20015	6770	1490	20514	6786	1839	20207	6776	1818	21471	6740	2125	65534	65534	65534	2097	7779	10096	6840
2024-03-21 09:00:00	19986	6816	1480	20494	6880	1838	20196	6830	1816	21461	6770	2128	65534	65534	65534	2099	7792	10098	6966
2024-03-21 09:30:00	19963	6904	1476	20419	7073	1805	20447	6942	1974	21426	6834	2125	65534	65534	65534	2100	7819	10098	7201
2024-03-21 10:00:00	19923	6984	1471	22765	7061	2101	22682	7208	2250	21727	6892	2186	65534	65534	65534	2100	7830	10099	7382
2024-03-21 10:30:00	23259	6941	1775	22838	6974	2084	22243	7222	2154	23653	6808	2359	65534	65534	65534	2100	7820	10102	7386
2024-03-21 11:00:00	24391	6893	1825	22411	6998	2032	21902	7203	2096	23353	6833	2317	65534	65534	65534	2100	7821	10103	7314
2024-03-21 11:30:00	23836	6948	1790	22251	7074	2018	21792	7220	2078	23184	6890	2299	65534	65534	65534	2100	7829	10103	7372
2024-03-21 12:00:00	23472	6991	1768	22134	7149	2014	21689	7239	2063	23061	6934	2287	65534	65534	65534	2100	7844	10102	7446
2024-03-21 12:30:00	23183	7017	1754	22054	7201	2008	21584	7235	2050	22964	6950	2281	65534	65534	65534	2100	7857	10101	7502
2024-03-21 13:00:00	22961	7044	1739	21997	7227	2007	21494	7233	2038	22896	6965	2273	65534	65534	65534	2100	7859	10098	7528
2024-03-21 13:30:00	22773	7062	1728	21952	7236	2003	21414	7230	2026	22840	6976	2269	65534	65534	65534	2100	7865	10097	7522
2024-03-21 14:00:00	22608	7081	1718	21921	7255	2000	21345	7236	2018	22786	6990	2265	65534	65534	65534	2100	7868	10095	7534
2024-03-21 14:30:00	22469	7097	1710	21886	7267	1999	21275	7247	2008	22737	7007	2259	65534	65534	65534	2100	7871	10091	7555
2024-03-21 15:00:00	22331	7110	1702	21862	7276	1995	21208	7255	2000	22688	7020	2258	65534	65534	65534	2100	7871	10090	7558
2024-03-21 15:30:00	22230	7120	1694	21827	7277	1982	21150	7258	1993	22647	7029	2252	65534	65534	65534	2100	7869	10088	7543
2024-03-21 16:00:00	22153	7122	1688	21820	7262	1981	21102	7245	1988	22615	7030	2250	65534	65534	65534	2100	7868	10088	7508
2024-03-21 16:30:00	22079	7132	1682	21805	7254	1982	21065	7241	1983	22593	7041	2248	65534	65534	65534	2100	7863	10088	7480
2024-03-21 17:00:00	22019	7143	1682	21795	7250	1982	21034	7250	1978	22570	7050	2247	65534	65534	65534	2100	7863	10086	7467
2024-03-21 17:30:00	21960	7144	1677	21785	7237	1982	21001	7248	1975	22550	7048	2246	65534	65534	65534	2100	7859	10084	7444
2024-03-21 18:00:00	21922	7109	1675	21781	7185	1982	20978	7199	1973	22533	7013	2246	65534	65534	65534	2100	7855	10083	7351
2024-03-21 18:30:00	21892	7060	1672	21788	7118	1982	20969	7135	1969	22528	6963	2246	65534	65534	65534	2100	7853	10081	7254
2024-03-21 19:00:00	21872	7040	1671	21791	7085	1981	20962	7107	1966	22526	6949	2244	65534	65534	65534	2100	7850	10081	7203
2024-03-21 19:30:00	21856	7040	1667	21795	7067	1979	20951	7099	1964	22526	6950	2244	65534	65534	65534	2100	7847	10081	7167
2024-03-21 20:00:00	21842	7029	1667	21802	7040	1980	20943	7079	1959	22519	6946	2243	65534	65534	65534	2100	7848	10081	7112
2024-03-21 20:30:00	21835	7000	1667	21802	6994	1982	20941	7040	1959	22519	6923	2245	65534	65534	65534	2100	7843	10081	7029
2024-03-21 21:00:00	21836	6953	1666	21811	6933	1982	20941	6981	1958	22526	6884	2246	65534	65534	65534	2100	7844	10082	6918
2024-03-21 21:30:00	21844	6907	1667	21821	6875	1981	20943	6926	1954	22537	6842	2248	65534	65534	65534	2100	7838	10081	6830
2024-03-21 22:00:00	21846	6883	1666	21826	6854	1980	20944	6905	1951	22543	6825	2249	65534	65534	65534	2100	7840	10081	6820
[truncated: 7,859 more rows]
