# Supplementary material for: Thiamin addition to soil increases potato tuber thiamin content under greenhouse conditions
Source: PeerJ. 2026 Jan 29;14:e20684. doi: 10.7717/peerj.20684 (PMC12861137; doi:10.7717/peerj.20684)
Supplement: Supplemental Information 10 [file peerj-14-20684-s010.xlsx]

## Sheet: Fig 1
Fig 1A				Fig 1B
treatment	total thiamin nmol/g			treatment	total thiamin nmol/g
NP-NT	1.54			NP-0	1.54
NP-NT	1.796			NP-0	1.796
NP-NT	2.264			NP-0	2.264
NP-NT	1.56			NP-20	1.56
NP-NT	1			NP-20	1
NP-NT	1.316			NP-20	1.316
NP-NT	2.392			NP-50	2.392
NP-NT	1.64			NP-50	1.64
NP-NT	1.42			NP-50	1.42
NP-NT	1.312			NP-50	1.312
NP-NT	1.164			P-0	1.164
P-NT	1.572			P-0	1.572
P-NT	1.428			P-0	1.428
P-NT	2.164			P-0	2.164
P-NT	1.684			P-20	1.684
P-NT	1.444			P-20	1.444
P-NT	2.288			P-20	2.288
P-NT	2.376			P-20	2.376
P-NT	1.952			P-50	1.952
P-NT	1.212			P-50	1.212
P-NT	1.564			P-50	1.564
P-1X	2.572
P-1X	2.384
P-1X	2.428
P-1X	2.38
P-1X	1.868
P-1X	1.416
P-1X	1.652
P-1X	1.256
P-1X	1.712
P-1X	1.772
P-5X	2.188
P-5X	2.436
P-5X	5.14
P-5X	2.132
P-5X	2.336
P-5X	2.36
P-5X	1.312
P-5X	2.148
P-5X	2.56
P-5X	2.208
P-20X	6.912
P-20X	3.308
P-20X	3.436
P-20X	3.608
P-20X	3.5
P-20X	4.492
P-20X	3.132
P-20X	4.592
P-20X	2.536

## Sheet: Fig 2
Figure 2A&B
Well	Well Name	Well Type	Threshold (dRn)	Ct (dRn)	CV%		Sample	Ct	tech avg		Sample	Thiamine treatment	Pot #s	18S Ct	ThiC Ct	dCt	avg	stdev	ddCt	2^-ddCt	fold change	2^-dCt	avg	stdev	Standard error
A1	s1 18S +	Unknown	0.4377	17.96	0.705148		s1 18S +	17.96	18.05		1	0x	4&5	18.05	29.87	11.82	12.7933	0.817367	0.28	-1.21419	0.823591	0.000276583	0.000163968	8.56153e-05	4.943e-05
A2	s1 18S +	Unknown	0.4377	18.14				18.14			2	0x	16&17	17.875	31.695	13.82						6.91457e-05
A3	s2 18S +	Unknown	0.4377	17.74	1.06808		s2 18S +	17.74	17.875		3	0x	13&14	18.85	31.59	12.74						0.000146177
A4	s2 18S +	Unknown	0.4377	18.01				18.01			5	50x	1&3	18.08	31.53	13.45	13.0733	0.306195				8.93607e-05	0.000118645	2.49285e-05	1.43925e-05
A5	s3 18S +	Unknown	0.4377	18.73	0.900295		s3 18S +	18.73	18.85		6	50x	13&14	19.39	32.09	12.7						0.000150286
A6	s3 18S +	Unknown	0.4377	18.97				18.97			7	50x	4&5	19.34	32.41	13.07						0.000116289
A7	s5 18S +	Unknown	0.4377	17.9	1.40796		s5 18S +	17.9	18.08
A8	s5 18S +	Unknown	0.4377	18.26				18.26														T.test of 2^dCt
A9	s6 18S +	Unknown	0.4377	19.4	0.0729352		s6 18S +	19.4	19.39													0.51201
A10	s6 18S +	Unknown	0.4377	19.38				19.38
A11	s7 18S +	Unknown	0.4377	19.31	0.219371		s7 18S +	19.31	19.34
A12	s7 18S +	Unknown	0.4377	19.37				19.37			Sample	Thiamine treatment	Pot #s	18S Ct	ThiI Ct	dCt	avg	stdev	ddCt	2^-ddCt	fold change	2^-dCt	avg	stdev	Standard error
B1	s1 ThiC+	Unknown	0.4377	29.78	0.426111		s1 ThiC+	29.78	29.87		1	0x	4&5	18.05	25.475	7.425	9.07167	1.50094	0.455	-1.37078	0.72951	0.00581905	0.00287867	0.00221587	0.00127933
B2	s1 ThiC+	Unknown	0.4377	29.96				29.96			2	0x	16&17	17.875	28.93	11.055						0.000470017
B3	s2 ThiC+	Unknown	0.4377	31.72	0.111549		s2 ThiC+	31.72	31.695		3	0x	13&14	18.85	27.585	8.735						0.00234695
B4	s2 ThiC+	Unknown	0.4377	31.67				31.67			5	50x	1&3	18.08	28.115	10.035	9.52667	0.871611				0.000953156	0.00165002	0.0010781	0.000622442
B5	s3 ThiC+	Unknown	0.4377	31.53	0.268607		s3 ThiC+	31.53	31.59		6	50x	13&14	19.39	27.69	8.3						0.00317286
B6	s3 ThiC+	Unknown	0.4377	31.65				31.65			7	50x	4&5	19.34	29.585	10.245						0.000824039
B7	s5 ThiC+	Unknown	0.4377	31.44	0.403677		s5 ThiC+	31.44	31.53
B8	s5 ThiC+	Unknown	0.4377	31.62				31.62						18.5975								T.test of 2^dCt
B9	s6 ThiC+	Unknown	0.4377	No Ct	-> outlier removed		s6 ThiC+	No Ct	32.09													0.519627
B10	s6 ThiC+	Unknown	0.4377	32.09				32.09
B11	s7 ThiC+	Unknown	0.4377	32.47	0.261811		s7 ThiC+	32.47	32.41
B12	s7 ThiC+	Unknown	0.4377	32.35				32.35			Sample	Thiamine treatment	Pot #s	18S Ct	ST-IR Ct	dCt	avg	stdev	ddCt	2^-ddCt	fold change	2^-dCt	avg	stdev	Standard error
C1	s1 ThiI+	Unknown	0.4377	25.5	0.138784		s1 ThiI+	25.5	25.475		1	0x	4&5	18.05	31.44	13.39	14.3267	0.738471	0.0766667	-1.05458	0.948246	9.31555e-05	5.54105e-05	2.78819e-05	1.60976e-05
C2	s1 ThiI+	Unknown	0.4377	25.45				25.45			2	0x	16&17	17.875	33.07	15.195						2.66593e-05
C3	s2 ThiI+	Unknown	0.4377	28.86	0.342188		s2 ThiI+	28.86	28.93		3	0x	13&14	18.85	33.245	14.395						4.64166e-05
C4	s2 ThiI+	Unknown	0.4377	29				29			5	50x	1&3	18.08	33.115	15.035	14.4033	0.533578				2.97861e-05	4.94061e-05	1.81752e-05	1.04935e-05
C5	s3 ThiI+	Unknown	0.4377	27.58	0.0256337		s3 ThiI+	27.58	27.585		6	50x	13&14	19.39	33.12	13.73						7.35967e-05
C6	s3 ThiI+	Unknown	0.4377	27.59				27.59			7	50x	4&5	19.34	33.785	14.445						4.48355e-05
C7	s5 ThiI+	Unknown	0.4377	28.24	0.628763		s5 ThiI+	28.24	28.115
C8	s5 ThiI+	Unknown	0.4377	27.99				27.99														T.test of 2^dCt
C9	s6 ThiI+	Unknown	0.4377	27.75	0.306438		s6 ThiI+	27.75	27.69													0.811203
C10	s6 ThiI+	Unknown	0.4377	27.63				27.63
C11	s7 ThiI+	Unknown	0.4377	29.66	0.358513		s7 ThiI+	29.66	29.585
C12	s7 ThiI+	Unknown	0.4377	29.51				29.51			Sample	Thiamine treatment	Pot #s	18S Ct	ST-IS Ct	dCt	avg	stdev	ddCt	2^-ddCt	fold change	2^-dCt	avg	stdev	Standard error
D1	s1 ST-IR+	Unknown	0.4377	31.49	0.224907		s1 ST-IR+	31.49	31.44		1	0x	4&5	18.05	30.095	12.045	13.3883	1.20345	-0.516667	-0.698985	1.43065	0.000236643	0.000125848	8.46246e-05	4.8858e-05
D2	s1 ST-IR+	Unknown	0.4377	31.39				31.39			2	0x	16&17	17.875	32.84	14.965						3.1267e-05
D3	s2 ST-IR+	Unknown	0.4377	33.01	0.256585		s2 ST-IR+	33.01	33.07		3	0x	13&14	18.85	32.005	13.155						0.000109635
D4	s2 ST-IR+	Unknown	0.4377	33.13				33.13			5	50x	1&3	18.08	31.68	13.6	12.8717	0.523137				8.05364e-05	0.000141686	4.46032e-05	2.57517e-05
D5	s3 ST-IR+	Unknown	0.4377	33.13	0.4892		s3 ST-IR+	33.13	33.245		6	50x	13&14	19.39	31.785	12.395						0.000185666
D6	s3 ST-IR+	Unknown	0.4377	33.36				33.36			7	50x	4&5	19.34	31.96	12.62						0.000158855
D7	s5 ST-IR+	Unknown	0.4377	33.33	0.918182		s5 ST-IR+	33.33	33.115
D8	s5 ST-IR+	Unknown	0.4377	32.9				32.9														T.test of 2^dCt
D9	s6 ST-IR+	Unknown	0.4377	32.89	0.982093		s6 ST-IR+	32.89	33.12													0.826373
D10	s6 ST-IR+	Unknown	0.4377	33.35				33.35
D11	s7 ST-IR+	Unknown	0.4377	33.87	0.355803		s7 ST-IR+	33.87	33.785
D12	s7 ST-IR+	Unknown	0.4377	33.7				33.7
E1	s1 ST-IS+	Unknown	0.4377	30.13	0.164471		s1 ST-IS+	30.13	30.095
E2	s1 ST-IS+	Unknown	0.4377	30.06				30.06
E3	s2 ST-IS+	Unknown	0.4377	32.82	0.0861275		s2 ST-IS+	32.82	32.84			Results of NTCs
E4	s2 ST-IS+	Unknown	0.4377	32.86				32.86				Well Name	Well Type	Threshold (dRn)	Ct (dRn)
E5	s3 ST-IS+	Unknown	0.4377	32.22	0.950026		s3 ST-IS+	32.22	32.005			18S	Unknown	0.4959	No Ct
E6	s3 ST-IS+	Unknown	0.4377	31.79				31.79				18S	Unknown	0.4959	37.91
E7	s5 ST-IS+	Unknown	0.4377	31.71	0.133922		s5 ST-IS+	31.71	31.68			18S	Unknown	0.4959	32.58
E8	s5 ST-IS+	Unknown	0.4377	31.65				31.65				THIC IR	Unknown	0.4959	No Ct
E9	s6 ST-IS+	Unknown	0.4377	31.6	0.823123		s6 ST-IS+	31.6	31.785			THIC IR	Unknown	0.4959	No Ct
E10	s6 ST-IS+	Unknown	0.4377	31.97				31.97				THIC IR	Unknown	0.4959	No Ct
E11	s7 ST-IS+	Unknown	0.4377	31.94	0.088499		s7 ST-IS+	31.94	31.96			THIC IS	Unknown	0.4959	No Ct
E12	s7 ST-IS+	Unknown	0.4377	31.98				31.98				THIC IS	Unknown	0.4959	No Ct
F1	s1 18S -	No RT	0.4377	33.78	1.50201							THIC IS	Unknown	0.4959	No Ct
F2	s1 18S -	No RT	0.4377	33.07								THIC	Unknown	0.4959	No Ct
F3	s2 18S -	No RT	0.4377	32.83	1.19595							THIC	Unknown	0.4959	No Ct
F4	s2 18S -	No RT	0.4377	33.39								THIC	Unknown	0.4959	35.51
F5	s3 18S -	No RT	0.4377	34.41	0.123404							THI1	Unknown	0.4959	No Ct
F6	s3 18S -	No RT	0.4377	34.35								THI2	Unknown	0.4959	No Ct
F7	s5 18S -	No RT	0.4377	33.74	0.230909							THI3	Unknown	0.4959	No Ct
F8	s5 18S -	No RT	0.4377	33.63
F9	s6 18S -	No RT	0.4377	33.05	1.04064
F10	s6 18S -	No RT	0.4377	33.54
F11	s7 18S -	No RT	0.4377	32.56	0.627002
F12	s7 18S -	No RT	0.4377	32.85
G1	s1 ThiC-	No RT	0.4377	38.21	0.371087
G2	s2 ThiC-	No RT	0.4377	38.01
G3	s3 ThiC-	No RT	0.4377	37.82	0.372947
G4	s5 ThiC-	No RT	0.4377	38.02
G5	s6 ThiC-	No RT	0.4377	38.65	0.7541
G6	s7 ThiC-	No RT	0.4377	38.24
G7	s1 ThiI-	No RT	0.4377	No Ct
G8	s2 ThiI-	No RT	0.4377	No Ct
G9	s3 ThiI-	No RT	0.4377	No Ct
G10	s5 ThiI-	No RT	0.4377	No Ct
G11	s6 ThiI-	No RT	0.4377	No Ct
G12	s7 ThiI-	No RT	0.4377	No Ct
H1	s1 ST-IR-	No RT	0.4377	No Ct
H2	s2 ST-IR-	No RT	0.4377	No Ct
H3	s3 ST-IR-	No RT	0.4377	No Ct
H4	s5 ST-IR-	No RT	0.4377	No Ct
H5	s6 ST-IR-	No RT	0.4377	No Ct
H6	s7 ST-IR-	No RT	0.4377	No Ct
H7	s1 ST-IS-	No RT	0.4377	No Ct
H8	s2 ST-IS-	No RT	0.4377	No Ct
H9	s3 ST-IS-	No RT	0.4377	No Ct
H10	s5 ST-IS-	No RT	0.4377	No Ct
H11	s6 ST-IS-	No RT	0.4377	No Ct
H12	s7 ST-IS-	No RT	0.4377	No Ct
Figure 2C
Well	Well Name	Well Type	Threshold (dRn)	Ct (dRn)			Sample	Ct	tech avg		Sample	Thiamine treatment	Pot #s	18S Ct	ThiC Ct	dCt	avg	stdev	ddCt	2^-ddCt	fold change	2^-dCt	avg	stdev	Standard error
A1	s1 18S+	Unknown	0.4577	16.29	0.382191		s1 18S+	16.29	16.34		1	0x	4&5	16.34	29.7967	13.4567	13.7533	0.327697	-0.124167	1.08988	1.08988	8.89487e-05	7.42084e-05	1.55124e-05	8.95611e-06
A2	s1 18S+	Unknown	0.4577	16.41				16.41			2	0x	16&17	16.4933	30.0867	13.5933						8.09094e-05
A3	s1 18S+	Unknown	0.4577	16.32				16.32			4	0x	14&15	16.3133	30.5233	14.21						5.27672e-05
A4	s1 ThiC	Unknown	0.4577	29.88	0.825032		s2 18S+	16.34	16.4933		5	50x	13&14	16.0833	29.14	13.0567						0.000117369
A5	s1 ThiC	Unknown	0.4577	29.52				15.97			6	50x	3&4	16.3133	29.83	13.5167	13.6292	0.384262				8.53253e-05	8.18547e-05	2.27061e-05	1.1353e-05
A6	s1 ThiC	Unknown	0.4577	29.99				17.17			7	50x	16&17	15.9167	29.9767	14.06						5.85488e-05
A7	s1 ST-IR	Unknown	0.4577	31.11	1.30573		s4 18S+	16.12	16.3133		8	50x	4&5	15.6333	29.5167	13.8833						6.6176e-05
A8	s1 ST-IR	Unknown	0.4577	30.46				16.48
A9	s1 ST-IR	Unknown	0.4577	31.2				16.34
A10	s1 ST-IS	Unknown	0.4577	32.34	0.500791		s5 18S+	16.21	16.0833													T.test of 2^dCt
A11	s1 ST-IS	Unknown	0.4577	32.6				15.99														0.689015
A12	s1 ST-IS	Unknown	0.4577	32.64				16.05
B1	s2 18S+	Unknown	0.4577	16.34	3.72586		s6 18S+	16.31	16.3133
B2	s2 18S+	Unknown	0.4577	15.97				16.24
B3	s2 18S+	Unknown	0.4577	17.17				16.39
B4	s2 ThiC	Unknown	0.4577	30.15	0.423477		s7 18S+	16.11	15.9167
B5	s2 ThiC	Unknown	0.4577	29.94				15.74
B6	s2 ThiC	Unknown	0.4577	30.17				15.9
B7	s2 ST-IR	Unknown	0.4577	31.16	0.671455		s8 18S+	15.33	15.6333
B8	s2 ST-IR	Unknown	0.4577	31.57				15.54
B9	s2 ST-IR	Unknown	0.4577	31.45				16.03			Sample	Thiamine treatment	Pot #s	18S Ct	ST-IR Ct	dCt	avg	stdev	ddCt	2^-ddCt	fold change	2^-dCt	avg	stdev	Standard error
B10	s2 ST-IS	Unknown	0.4577	32.84	0.646344		s1 ThiC	29.88	29.7967		1	0x	4&5	16.34	30.9233	14.5833	15.0256	0.42178	0.228194	0.853703	-1.17137	4.07361e-05	3.12238e-05	8.43817e-06	4.87178e-06
B11	s2 ST-IS	Unknown	0.4577	33.22				29.52			2	0x	16&17	16.4933	31.3933	14.9						3.27079e-05
B12	s2 ST-IS	Unknown	0.4577	33.2				29.99			4	0x	14&15	16.3133	31.9067	15.5933						2.02273e-05
C1	s4 18S+	Unknown	0.4577	16.12	1.11244		s2 ThiC	30.15	30.0867		5	50x	13&14	16.0833	30.7367	14.6533						3.88067e-05
C2	s4 18S+	Unknown	0.4577	16.48				29.94			6	50x	3&4	16.3133	31.955	15.6417	15.2538	0.442506				1.95609e-05	2.68394e-05	8.31237e-06	4.15618e-06
C3	s4 18S+	Unknown	0.4577	16.34				30.17			7	50x	16&17	15.9167	31.63	15.7133						1.8613e-05
C4	s4 ThiC	Unknown	0.4577	30.61	0.264811		s4 ThiC	30.61	30.5233		8	50x	4&5	15.6333	30.64	15.0067						3.03769e-05
C5	s4 ThiC	Unknown	0.4577	30.45				30.45
C6	s4 ThiC	Unknown	0.4577	30.51				30.51
C7	s4 ST-IR	Unknown	0.4577	31.87	0.148114		s5 ThiC	29.3	29.14													T.test of 2^dCt
C8	s4 ST-IR	Unknown	0.4577	31.89				28.97														0.587138
C9	s4 ST-IR	Unknown	0.4577	31.96				29.15
C10	s4 ST-IS	Unknown	0.4577	32.95	3.23372		s6 ThiC	29.95	29.83
C11	s4 ST-IS	Unknown	0.4577	33.11				29.76
C12	s4 ST-IS	Unknown	0.4577	34.91				29.78
D1	s5 18S+	Unknown	0.4577	16.21	0.707097		s7 ThiC	29.7	29.9767
D2	s5 18S+	Unknown	0.4577	15.99				30.15
D3	s5 18S+	Unknown	0.4577	16.05				30.08
D4	s5 ThiC	Unknown	0.4577	29.3	0.567011		s8 ThiC	29.6	29.5167
D5	s5 ThiC	Unknown	0.4577	28.97				29.41
D6	s5 ThiC	Unknown	0.4577	29.15				29.54			Sample	Thiamine treatment	Pot #s	18S Ct	ST-IS Ct	dCt	avg	stdev	ddCt	2^-ddCt	fold change	2^-dCt	avg	stdev	Standard error
D7	s5 ST-IR	Unknown	0.4577	30.81	0.307503		s1 ST-IR	31.11	30.9233		1	0x	4&5	16.34	32.5267	16.1867	16.7078	0.479091	-0.692778	1.61639	1.61639	1.34069e-05	9.84473e-06	3.02427e-06	1.74606e-06
D8	s5 ST-IR	Unknown	0.4577	30.77				30.46			2	0x	16&17	16.4933	33.0867	16.5933						1.01137e-05
D9	s5 ST-IR	Unknown	0.4577	30.63				31.2			4	0x	14&15	16.3133	33.6567	17.3433						6.01363e-06
D10	s5 ST-IS	Unknown	0.4577	31.17	0.763706		s2 ST-IR	31.16	31.3933		5	50x	13&14	16.0833	31.2433	15.16						2.7314e-05
D11	s5 ST-IS	Unknown	0.4577	31.05				31.57			6	50x	3&4	16.3133	33.2533	16.94	16.015	0.631161				7.95338e-06	1.65568e-05	6.93824e-06	3.46912e-06
D12	s5 ST-IS	Unknown	0.4577	31.51				31.45			7	50x	16&17	15.9167	31.9433	16.0267						1.49793e-05
E1	s6 18S+	Unknown	0.4577	16.31	0.460087		s4 ST-IR	31.87	31.9067		8	50x	4&5	15.6333	31.5667	15.9333						1.59804e-05
E2	s6 18S+	Unknown	0.4577	16.24				31.89
E3	s6 18S+	Unknown	0.4577	16.39				31.96
E4	s6 ThiC	Unknown	0.4577	29.95	0.349994		s5 ST-IR	30.81	30.7367													T.test of 2^dCt
E5	s6 ThiC	Unknown	0.4577	29.76				30.77														0.242529
E6	s6 ThiC	Unknown	0.4577	29.78				30.63
E7	s6 ST-IR	Unknown	0.4577	32.21	1.12854		s6 ST-IR	32.21	31.955
E8	s6 ST-IR	Unknown	0.4577	31.7				31.7
E9	s6 ST-IR	Unknown	0.4577	38.99	-> outlier removed			=E158
E10	s6 ST-IS	Unknown	0.4577	34.36	2.90463		s7 ST-IR	31.64	31.63
E11	s6 ST-IS	Unknown	0.4577	32.82				31.41
E12	s6 ST-IS	Unknown	0.4577	32.58				31.84
F1	s7 18S+	Unknown	0.4577	16.11	1.16584		s8 ST-IR	31.02	30.64
F2	s7 18S+	Unknown	0.4577	15.74				30.62
F3	s7 18S+	Unknown	0.4577	15.9				30.28
F4	s7 ThiC	Unknown	0.4577	29.7	0.807772		s1 ST-IS	32.34	32.5267
F5	s7 ThiC	Unknown	0.4577	30.15				32.6
F6	s7 ThiC	Unknown	0.4577	30.08				32.64
F7	s7 ST-IR	Unknown	0.4577	31.64	0.680286		s2 ST-IS	32.84	33.0867
F8	s7 ST-IR	Unknown	0.4577	31.41				33.22
F9	s7 ST-IR	Unknown	0.4577	31.84				33.2
F10	s7 ST-IS	Unknown	0.4577	32.56	1.70387		s4 ST-IS	32.95	33.6567
F11	s7 ST-IS	Unknown	0.4577	31.74				33.11
F12	s7 ST-IS	Unknown	0.4577	31.53				34.91
G1	s8 18S+	Unknown	0.4577	15.33	2.29773		s5 ST-IS	31.17	31.2433
G2	s8 18S+	Unknown	0.4577	15.54				31.05
G3	s8 18S+	Unknown	0.4577	16.03				31.51
G4	s8 ThiC	Unknown	0.4577	29.6	0.329053		s6 ST-IS	34.36	33.2533
G5	s8 ThiC	Unknown	0.4577	29.41				32.82
G6	s8 ThiC	Unknown	0.4577	29.54				32.58
G7	s8 ST-IR	Unknown	0.4577	31.02	1.20889		s7 ST-IS	32.56	31.9433
G8	s8 ST-IR	Unknown	0.4577	30.62				31.74
G9	s8 ST-IR	Unknown	0.4577	30.28				31.53
G10	s8 ST-IS	Unknown	0.4577	31.58	0.13189		s8 ST-IS	31.58	31.5667
G11	s8 ST-IS	Unknown	0.4577	31.6				31.6
G12	s8 ST-IS	Unknown	0.4577	31.52				31.52
Figure 2D
Well	Well Name	Well Type	Threshold (dRn)	Ct (dRn)			Sample	Ct	tech avg		Sample	Thiamine treatment	Pot #s	18S Ct	Thi1 Ct	dCt	avg	stdev	ddCt	2^-ddCt	fold change	2^-dCt	avg	stdev	Standard error
A1	1 18S	Unknown	0.4479	17.01	0.703579		1 18S	17.01	16.9567		1	0x	4&5	16.9567	28.6933	11.7367	12.6839	0.787603	-0.341389	1.26698	-0.789281	0.000293029	0.000175201	8.92824e-05	5.15472e-05
A2	1 18S	Unknown	0.4479	16.82				16.82			2	0x	16&17	16.2967	28.9467	12.65						0.000155586
A3	1 18S	Unknown	0.4479	17.04				17.04			4	0x	14&15	17.185	30.85	13.665						7.69884e-05
A4	1 + Thi1	Unknown	0.4479	28.39	0.973552		1 + Thi1	28.39	28.6933		5	50x	13&14	17.2133	28.62	11.4067	12.3425	0.791919				0.000368342	0.000222292	0.000112148	5.60742e-05
A5	1 + Thi2	Unknown	0.4479	28.75				28.75			6	50x	3&4	17.0133	29.93	12.9167						0.000129329
A6	1 + Thi3	Unknown	0.4479	28.94				28.94			7	50x	16&17	16.79	30.1	13.31						9.8467e-05
A7	1 - ThiI	No RT	0.4479	No Ct			2 18S	16.21	16.2967		8	50x	4&5	17.1933	28.93	11.7367						0.000293029
A8	1 - ThiI	No RT	0.4479	No Ct				16.29
A9	1 - ThiI	No RT	0.4479	No Ct				16.39
B1	2 18S	Unknown	0.4479	16.21	0.553395		2 + Thi1	29	28.9467													T.test of 2^dCt
B2	2 18S	Unknown	0.4479	16.29				28.47														0.63434
B3	2 18S	Unknown	0.4479	16.39				29.37
B4	2 + Thi1	Unknown	0.4479	29	1.56275		4 18S	16.94	17.185
B5	2 + Thi2	Unknown	0.4479	28.47				=E208
B6	2 + Thi3	Unknown	0.4479	29.37				17.43
B7	2 - ThiI	No RT	0.4479	No Ct			4 + ThiI	31.36	30.85
B8	2 - ThiI	No RT	0.4479	No Ct				=E211
B9	2 - ThiI	No RT	0.4479	No Ct				30.34
C1	4 18S	Unknown	0.4479	16.94	2.01619		5 18S	17.35	17.2133
C2	4 18S	Unknown	0.4479	34.57	-> outlier removed			17.11
C3	4 18S	Unknown	0.4479	17.43				17.18
C4	4 + ThiI	Unknown	0.4479	31.36	5.78054		5 + ThiI	28.79	28.62
C5	4 + ThiI	Unknown	0.4479	27.99	-> outlier removed			No Ct
C6	4 + ThiI	Unknown	0.4479	30.34				28.45
C7	4 - ThiI	No RT	0.4479	No Ct			6 18S	17.05	17.0133
C8	4 - ThiI	No RT	0.4479	No Ct				17.03
C9	4 - ThiI	No RT	0.4479	No Ct				16.96
D1	5 18S	Unknown	0.4479	17.35	0.717022		6 + ThiI	30.39	29.93
D2	5 18S	Unknown	0.4479	17.11				29.45
D3	5 18S	Unknown	0.4479	17.18				29.95
D4	5 + ThiI	Unknown	0.4479	28.79	0.840029		7 18S	16.52	16.79
D5	5 + ThiI	Unknown	0.4479	No Ct				17.62
D6	5 + ThiI	Unknown	0.4479	28.45				16.23
D7	5 - ThiI	No RT	0.4479	No Ct			7 + ThiI	29.93	30.1
D8	5 - ThiI	No RT	0.4479	42.14				29.89
D9	5 - ThiI	No RT	0.4479	No Ct				30.48
E1	6 18S	Unknown	0.4479	17.05	0.277771		8 18S	17.19	17.1933
E2	6 18S	Unknown	0.4479	17.03				17.15
E3	6 18S	Unknown	0.4479	16.96				17.24
E4	6 + ThiI	Unknown	0.4479	30.39	1.5714		8 + ThiI	28.71	28.93
E5	6 + ThiI	Unknown	0.4479	29.45				28.69
E6	6 + ThiI	Unknown	0.4479	29.95				29.39
E7	6 - ThiI	No RT	0.4479	No Ct
E8	6 - ThiI	No RT	0.4479	No Ct
E9	6 - ThiI	No RT	0.4479	No Ct
F1	7 18S	Unknown	0.4479	16.52	4.36736
F2	7 18S	Unknown	0.4479	17.62
F3	7 18S	Unknown	0.4479	16.23
F4	7 + ThiI	Unknown	0.4479	29.93	1.09534
F5	7 + ThiI	Unknown	0.4479	29.89
F6	7 + ThiI	Unknown	0.4479	30.48
F7	C7 - ThiI	No RT	0.4479	No Ct
F8	C7 - ThiI	No RT	0.4479	No Ct
F9	C7 - ThiI	No RT	0.4479	43.5
H1	8 18S	Unknown	0.4479	17.19	0.262267
H2	8 18S	Unknown	0.4479	17.15
H3	8 18S	Unknown	0.4479	17.24
H4	8 + ThiI	Unknown	0.4479	28.71	1.37745
H5	8 + ThiI	Unknown	0.4479	28.69
H6	8 + ThiI	Unknown	0.4479	29.39
H7	8 - ThiI	No RT	0.4479	No Ct
H8	8 - ThiI	No RT	0.4479	No Ct
H9	8 - ThiI	No RT	0.4479	No Ct
					0.877367	Overall intra-assay variation (CV%)
Figure 2E
Snowden
	Pot#	Thiamin	ThMP	ThDP	Total
0x	2,3	3.73333	0	4.8	8.53333
0x	13,14	1.86667	0	0	1.86667
0x	4,5	1.06667	0	0	1.06667
50x	1,3	9.33333	4.8	7.2	21.3333
50x	13,14	4.8	0	12.5333	17.3333
50x	16,17	1.86667	0	6.4	8.26667
Figure 2F
Clearwater
	Pot#	Thiamin	ThMP	ThDP	Total
0x	14,15	2.66667	0	0	2.66667
0x	4,5	2.66667	0	6.4	9.06667
0x	16,17	1.33333	0	0	1.33333
50x	3	9.86667	0	6.93333	16.8
50x	4,5	3.2	0	4.8	8
50x	16,17	3.46667	0	4.26667	7.73333
50x	13,14	2.13333	0	0	2.13333

## Sheet: Fig 3&4
file_name	Class	L-(+) lactic acid	L-valine 1	acetohydroxamic acid	L-proline 1	benzoic acid	ethanolamine	phosphoric acid	DL-isoleucine 2	glycine	succinic acid	glyceric acid	glyoxylic acid	fumaric acid	pelargonic acid (nonanoic acid)	L-threonine 2	L-methionine 1	aspartic acid 1	Beta- alanine	D-malic acid	L-pyroglutamic acid	gamma-aminobutyric acid (GABA)	threonic acid	L-glutamic acid	L-asparagine	ribitol	2-amino-1-phenylethanol	citric acid	quinic acid	D-allose 2	D-mannitol	myo-inositol	D-glucose-6-phosphate 2	Sucrose	galactinol 2	glycerol	L-proline	galactosamine 2	D-mannose 2	2-hydroxypyridine	L-serine	D (+)altrose 2	glycolic acid	L-leucine 1	DL-isoleucine 1	L-valine 2	urea	nicotinic acid	5,10,15,20-tetra(4-pyridyl)-21H,23H-porphine
1_4.FIN	0x	313621		955809		448848	211300	2.06604e+07		531818	286126	328659	303924	453729	942618	1160911	552132	1359011	582743	9.57487e+06	12619038	13319709	3875907	2144641	1.05983e+07	7319288		5.12067e+07	1888581	81595		7.10841e+06		93993475	1431250	2165222	2.88853e+06			183440	1.22099e+06	107221	47421.5	196436	2.03271e+06	6816632	10620	98436.5	313028
2_4.FIN	0x	698421	5369190	979880	834344	489404	134700	22073013		601008	220194	284453	334096	326754	1.22438e+06		444092		668520	13008070	1.92005e+07	1.60249e+07	4942847	2.15698e+06	5056529	8291733		5.6788e+07	2.66649e+06			6570151		1.25416e+08	1902672	2.22569e+06			1216066	147236	1.20236e+06		64932.5	168101	582248	5143996	15674	133664	312177
3_4.FIN	0x		4692258	1056136		460908	124999	2.37636e+07		500778	186292	215072	341550	207220	859000	1.07938e+06	358148		456973	10225335	16871480	17051277	4.19458e+06	2360075	1.05224e+07	8.23681e+06		61914773	3597050	153371		6873406		9.25375e+07	778045	1.93037e+06	2.37118e+06			208022	1204758	188770	47523.5		838860			137349
4_3.FIN	0x		6158023	793624	5245374	375838	130778	20764202		482388	184694	275744	275974	295194	749622	1.09262e+06	432232	2912183	700940	8.61839e+06	20373720	1.28475e+07	4255199	2218887	9.91924e+06	7034001		55135923	1.6381e+06	65262		7.30651e+06		94566828	1117756	1.64979e+06	1302707	44369		261122	1314063	26307	36111	183749	1042652	3162470	85016.5	77069
5_4.FIN	0x	191203	4562404	1.02459e+06		408401	66393	14515114	2604846	676189	236052	294842	364456	143598	1137402	1040745	528840		857936	9.16175e+06	1.39045e+07	10613549	4.17003e+06		8.94277e+06	8147534		73159950	5.14346e+06			5517306	81116	85493624	1.83173e+06	1.60849e+06	1.07735e+06			265227	1.30799e+06	493764	53297.5	196203		5186956	84728.5	96524.5
6_4.FIN	0x		3711248	1109418		474968	97973.5	22613115	593926	485900	204698	311546	368212	186779	981913	873778	371598	2833037	596079	1.30379e+07	17835659	1.53868e+07	3828882		5.7435e+06	8.87851e+06		6.9572e+07	4.2894e+06		626201	6.77836e+06	112091	8.93017e+07	703625	1794611	1.06211e+06			204528	1.1389e+06		41734.5	151578		4824321	17399.5	114598
7_4.FIN	50x	661572	7436928	1047955		303058	90277.5	23074929		806092	208932	372172	450122	228514	1.42416e+06	1.22608e+06	734118	3361338	1231422	7123559	23975869	24452913	4460040	2.89851e+06	1.68898e+07	9116072		59191479	2.31281e+06			5.42302e+06		105757492	1780048	2108346	3.39208e+06			184564	1.94012e+06	10744	36152.5	324818	1.72087e+06	5386443	9158	114252
8_4.FIN	50x		5.17353e+06	1003127		461418	202390	2.80846e+07		612936	202182	312518	367341	130560	1325854		328139		1116475	7.78479e+06	30156436	1.77836e+07	3979492	3.70765e+06	1.86157e+07	8302035		6.14792e+07	3.05638e+06		789564	10394243	120617	107974770	2240222	2289984	4.2142e+06	27463		199638	1576220		32170.5	124992	558770			145902
9_4.FIN	50x		9045045	622460		410482	250428	23752177		843742	217270	475722	318064	494192	885210	1388359	935125		972302	7399206	20055606	22943406	2.88677e+06	3305967	23868809	7.9175e+06		5.19181e+07	1250862			6.25754e+06	150642	114508236	1.19509e+06	2.32924e+06	2891613			254298	1857320	14194	33327.5	342877	1.72973e+06	7101059	56230.5	152356
10_4.FIN	50x	116662		1.03555e+06		308065	366684	23884266		576720	203600	279028	328004	302364	1.07862e+06	1362501	415220		751546	1.17262e+07	2.35074e+07	20903132	4.32302e+06	2.60683e+06	1.75628e+07	7846615		53964312	4593461			9.71022e+06		1.38054e+08	899018	2.9126e+06	4.09221e+06		2026729	191702	1251482		48484	209959	1.06245e+06	8.78816e+06	24846.5	134199
11_4.FIN	50x			1066152		555105	670184	22369474	4.96207e+06	846370	156592	291656	345762	140268	1.01808e+06	1.64743e+06	986724		1308850	2970907	19201346	25994270	3.59446e+06	3150946	60635624	9120037		43389345	1.52879e+06	150672		7772178	160859	1.1183e+08	831797	2230698	1.1745e+07			187060	2.06959e+06		49433	226844		1.25996e+07	9741	189574
12_4.FIN	50x		7.2003e+06	1215358	5816421	267240	164514	2.0454e+07		632344	157280	384872	331148	154368	994478	1.44046e+06	776654	4097119	1.35992e+06	6.62299e+06	25419877	2.10227e+07	3.74647e+06	2975465	12358109	8.91548e+06		6.35644e+07	2.94911e+06	48550	1165868	5.37787e+06	73284	9.45465e+07	1122245	2.12349e+06				287850	2071953	138100	49034.5	220992	1.67197e+06		55475	144986
[truncated: 85 more columns]

## Sheet: Fig 5
name	taxonomy_id	taxonomy_lvl	0X.bracken_num	0X.bracken_frac	20X.bracken_num	20X.bracken_frac
Photobacterium leiognathi	553611	S	44339	0.15519	15003	0.03849
Rhodanobacter thiooxydans	416169	S	1515	0.0053	6566	0.01685
Rhodanobacter denitrificans	666685	S	1121	0.00392	4433	0.01137
Rhodanobacter sp. FDAARGOS 1247	2778082	S	750	0.00263	2755	0.00707
Rhodanobacter sp. AS-Z3	3031330	S	104	0.00036	323	0.00083
Rhodanobacter glycinis	582702	S	117	0.00041	302	0.00077
Dyella sp. A6	3069105	S	39	0.00014	84	0.00022
Dyella sp. BiH032	3075430	S	39	0.00014	108	0.00028
Dyella sp. GSA-30	2994496	S	24	8e-05	65	0.00017
Dyella thiooxydans	445710	S	53	0.00019	225	0.00058
Dyella japonica	231455	S	30	0.00011	70	0.00018
Dyella telluris	2763498	S	16	6e-05	86	0.00022
Dyella terrae	522259	S	12	4e-05	36	9e-05
Dyella caseinilytica	1849581	S	12	4e-05	41	0.00011
Frateuria edaphi	2898793	S	118	0.00041	308	0.00079
Frateuria soli	1542730	S	108	0.00038	274	0.0007
Luteibacter flocculans	2780091	S	23	8e-05	26	7e-05
Luteibacter aegosomatis	2911537	S	19	7e-05	25	6e-05
Luteibacter aegosomaticola	2911538	S	18	6e-05	25	6e-05
Luteibacter rhizovicinus	242606	S	14	5e-05	17	4e-05
Luteibacter pinisoli	2589080	S	11	4e-05	33	8e-05
Aerosticca soli	2010829	S	25	9e-05	88	0.00023
Tahibacter amnicola	2976241	S	13	5e-05	12	3e-05
Dokdonella koreensis	323415	S	10	4e-05	26	7e-05
Lysobacter sp. TY2-98	2290922	S	30	0.00011	93	0.00024
Lysobacter sp. KIS68-7	2904252	S	29	0.0001	119	0.00031
Lysobacter sp. FW306-1B-D06B	3140250	S	23	8e-05	47	0.00012
Lysobacter sp. CW239	2762611	S	27	9e-05	111	0.00028
Lysobacter sp. 5GHs7-4	2904253	S	17	6e-05	91	0.00023
Lysobacter sp. K5869	2820808	S	17	6e-05	35	9e-05
Lysobacter sp. S4-A87	2925843	S	17	6e-05	66	0.00017
Lysobacter lycopersici	1324796	S	71	0.00025	220	0.00056
Lysobacter enzymogenes	69	S	75	0.00026	208	0.00053
Lysobacter terrestris	2865112	S	30	0.00011	129	0.00033
Lysobacter capsici	435897	S	75	0.00026	280	0.00072
Lysobacter soli	453783	S	27	9e-05	86	0.00022
Lysobacter maris	1605891	S	24	8e-05	89	0.00023
Lysobacter luteus	2822368	S	25	9e-05	79	0.0002
Lysobacter antibioticus	84531	S	23	8e-05	69	0.00018
Lysobacter alkalisoli	2591633	S	19	7e-05	72	0.00018
Lysobacter auxotrophicus	2992573	S	16	6e-05	53	0.00014
Lysobacter arenosi	2795387	S	14	5e-05	50	0.00013
Lysobacter solisilvae	2763317	S	11	4e-05	98	0.00025
Stenotrophomonas sp. MYb57	1827305	S	64	0.00022	0	0
Stenotrophomonas indicatrix	2045451	S	177	0.00062	0	0
Stenotrophomonas maltophilia	40324	S	121	0.00042	355	0.00091
Stenotrophomonas rhizophila	216778	S	21	7e-05	49	0.00013
Stenotrophomonas aracearum	3003272	S	25	9e-05	25	6e-05
Xanthomonas sp. CFBP 8443	2971235	S	21	7e-05	33	8e-05
Xanthomonas campestris	339	S	46	0.00016	85	0.00022
Xanthomonas translucens	343	S	33	0.00012	76	0.00019
Xanthomonas sacchari	56458	S	25	9e-05	50	0.00013
Xanthomonas oryzae	347	S	12	4e-05	14	4e-05
Pseudoxanthomonas sp. SE1	1664560	S	20	7e-05	54	0.00014
Pseudoxanthomonas sp. X-1	2571115	S	14	5e-05	36	9e-05
Pseudoxanthomonas sp. SL93	2995142	S	11	4e-05	48	0.00012
Pseudoxanthomonas mexicana	128785	S	51	0.00018	128	0.00033
Pseudoxanthomonas suwonensis	314722	S	22	8e-05	59	0.00015
Pseudoxanthomonas spadix	415229	S	13	5e-05	17	4e-05
Luteimonas sp. S4-F44	2925842	S	16	6e-05	30	8e-05
Luteimonas sp. MC1572	2799325	S	18	6e-05	42	0.00011
Luteimonas sp. JM171	1896164	S	13	5e-05	19	5e-05
Luteimonas yindakuii	2565782	S	15	5e-05	21	5e-05
Luteimonas granuli	1176533	S	13	5e-05	31	8e-05
Luteimonas fraxinea	2901869	S	12	4e-05	21	5e-05
Thermomonas sp. HDW16	2714945	S	13	5e-05	32	8e-05
Thermomonas sp. XSG	2771436	S	14	5e-05	35	9e-05
Thermomonas aquatica	2202149	S	29	0.0001	74	0.00019
Thermomonas brevis	215691	S	21	7e-05	67	0.00017
Thermomonas carbonis	1463158	S	12	4e-05	45	0.00012
Arenimonas daejeonensis	370777	S	17	6e-05	41	0.00011
Escherichia coli	562	S	108585	0.38007	90680	0.23266
Escherichia albertii	208962	S	83	0.00029	78	0.0002
Salmonella enterica	28901	S	5578	0.01952	6878	0.01765
Salmonella sp.	599	S	19793	0.06928	0	0
Shigella flexneri	623	S	13035	0.04562	13206	0.03388
Pseudomonas sp. B21-028	2895480	S	99	0.00035	75	0.00019
Pseudomonas corrugata	47879	S	53	0.00019	0	0
Pseudomonas fluorescens	294	S	66	0.00023	119	0.00031
Pseudomonas putida	303	S	448	0.00157	531	0.00136
Pseudomonas aeruginosa	287	S	98	0.00034	279	0.00072
Pseudomonas citronellolis	53408	S	18	6e-05	33	8e-05
Pseudomonas syringae	317	S	24	8e-05	41	0.00011
Pseudomonas viridiflava	33069	S	10	4e-05	0	0
Pseudomonas umsongensis	198618	S	47	0.00016	14	4e-05
Pseudomonas chlororaphis	587753	S	31	0.00011	27	7e-05
Pseudomonas otitidis	319939	S	15	5e-05	21	5e-05
Pseudomonas entomophila	312306	S	13	5e-05	0	0
Stutzerimonas stutzeri	316	S	46	0.00016	98	0.00025
Acinetobacter seifertii	1530123	S	346	0.00121	276	0.00071
Acinetobacter radioresistens	40216	S	39	0.00014	27	7e-05
Francisella halioticida	549298	S	114	0.0004	362	0.00093
Methylomagnum ishizawai	1760988	S	13	5e-05	0	0
Solimonas sp. K1W22B-7	2303331	S	11	4e-05	25	6e-05
Sulfurifustis variabilis	1675686	S	13	5e-05	14	4e-05
Immundisolibacter cernigliae	1810504	S	11	4e-05	14	4e-05
Bradyrhizobium sp. 170	2782641	S	651	0.00228	719	0.00184
Bradyrhizobium sp. 200	2782665	S	316	0.00111	386	0.00099
Bradyrhizobium sp. Ash2021	2954771	S	140	0.00049	272	0.0007
Bradyrhizobium sp. sBnM-33	2831780	S	106	0.00037	192	0.00049
Bradyrhizobium sp. CB3481	3039158	S	96	0.00034	131	0.00034
Bradyrhizobium sp. CCBAU 051011	858422	S	96	0.00034	153	0.00039
Bradyrhizobium sp. NP1	3049772	S	90	0.00032	223	0.00057
Bradyrhizobium sp. WD16	1521768	S	82	0.00029	185	0.00047
Bradyrhizobium sp. SK17	2057741	S	120	0.00042	168	0.00043
Bradyrhizobium sp. CCBAU 51753	1325100	S	71	0.00025	127	0.00033
Bradyrhizobium sp. BWA-3-5	3080013	S	68	0.00024	122	0.00031
Bradyrhizobium sp. BTAi1	288000	S	64	0.00022	128	0.00033
Bradyrhizobium sp. ORS 278	114615	S	60	0.00021	97	0.00025
Bradyrhizobium genosp. L	83637	S	57	0.0002	107	0.00027
Bradyrhizobium sp. 186	2782654	S	69	0.00024	93	0.00024
Bradyrhizobium sp. CB82	3039159	S	52	0.00018	80	0.00021
Bradyrhizobium sp. ORS 285	115808	S	44	0.00015	108	0.00028
Bradyrhizobium sp. CB1650	3039153	S	40	0.00014	70	0.00018
Bradyrhizobium sp. CCBAU 53421	1325120	S	34	0.00012	73	0.00019
Bradyrhizobium sp. B097	3140244	S	39	0.00014	49	0.00013
Bradyrhizobium sp. 1(2017)	1404888	S	28	0.0001	44	0.00011
Bradyrhizobium sp. NDS-1	3080014	S	27	9e-05	36	9e-05
Bradyrhizobium sp. 195	2782662	S	31	0.00011	45	0.00012
Bradyrhizobium sp. CCGE-LA001	1223566	S	27	9e-05	33	8e-05
Bradyrhizobium sp. 6(2017)	1197460	S	51	0.00018	63	0.00016
Bradyrhizobium sp. CIAT3101	439387	S	21	7e-05	66	0.00017
Bradyrhizobium sp. 41S5	1404443	S	29	0.0001	44	0.00011
Bradyrhizobium sp. B124	3140245	S	29	0.0001	52	0.00013
Bradyrhizobium sp. CCBAU 53340	1325112	S	27	9e-05	53	0.00014
Bradyrhizobium sp. CCBAU 51765	1325102	S	35	0.00012	21	5e-05
Bradyrhizobium sp. 62B	2898442	S	40	0.00014	34	9e-05
Bradyrhizobium sp. CB1717	3039154	S	17	6e-05	35	9e-05
Bradyrhizobium sp. 191	2782659	S	27	9e-05	32	8e-05
Bradyrhizobium sp. CB1015	2976822	S	16	6e-05	35	9e-05
Bradyrhizobium sp. BEA-2-5	3080015	S	20	7e-05	38	0.0001
Bradyrhizobium sp. C-145	574727	S	16	6e-05	19	5e-05
Bradyrhizobium sp.	376	S	84	0.00029	95	0.00024
Bradyrhizobium sp. CCBAU 53351	1325114	S	32	0.00011	37	9e-05
Bradyrhizobium erythrophlei	1437360	S	246	0.00086	414	0.00106
Bradyrhizobium sediminis	2840469	S	170	0.0006	307	0.00079
Bradyrhizobium symbiodeficiens	1404367	S	180	0.00063	827	0.00212
Bradyrhizobium diazoefficiens	1355477	S	422	0.00148	793	0.00203
Bradyrhizobium roseus	3056648	S	70	0.00025	73	0.00019
Bradyrhizobium prioritasuperba	2854389	S	63	0.00022	169	0.00043
Bradyrhizobium lablabi	722472	S	117	0.00041	212	0.00054
Bradyrhizobium canariense	255045	S	56	0.0002	103	0.00026
Bradyrhizobium elkanii	29448	S	82	0.00029	113	0.00029
Bradyrhizobium icense	1274631	S	49	0.00017	72	0.00018
Bradyrhizobium arachidis	858423	S	73	0.00026	159	0.00041
Bradyrhizobium paxllaeri	190148	S	38	0.00013	53	0.00014
Bradyrhizobium ontarionense	2898149	S	37	0.00013	67	0.00017
Bradyrhizobium japonicum	375	S	52	0.00018	79	0.0002
Bradyrhizobium oligotrophicum	44255	S	23	8e-05	49	0.00013
Bradyrhizobium guangzhouense	1325095	S	28	0.0001	32	8e-05
Bradyrhizobium commune	83627	S	20	7e-05	31	8e-05
Bradyrhizobium quebecense	2748629	S	22	8e-05	48	0.00012
Bradyrhizobium vignae	1549949	S	19	7e-05	22	6e-05
Bradyrhizobium guangdongense	1325090	S	23	8e-05	34	9e-05
Bradyrhizobium barranii	2992140	S	29	0.0001	53	0.00014
Bradyrhizobium septentrionale	1404411	S	20	7e-05	41	0.00011
Bradyrhizobium xenonodulans	2736875	S	16	6e-05	22	6e-05
Bradyrhizobium brasilense	1419277	S	16	6e-05	39	0.0001
Bradyrhizobium huanghuaihaiense	990078	S	14	5e-05	21	5e-05
Bradyrhizobium ottawaense	931866	S	29	0.0001	57	0.00015
Bradyrhizobium guangxiense	1325115	S	17	6e-05	35	9e-05
Bradyrhizobium cosmicum	1404864	S	12	4e-05	32	8e-05
Bradyrhizobium betae	244734	S	35	0.00012	79	0.0002
Bradyrhizobium yuanmingense	108015	S	24	8e-05	44	0.00011
Nitrobacter hamburgensis	912	S	409	0.00143	557	0.00143
Nitrobacter winogradskyi	913	S	96	0.00034	146	0.00037
Nitrobacter sp. NHB1	3119830	S	11	4e-05	21	5e-05
Rhodopseudomonas palustris	1076	S	190	0.00067	303	0.00078
Rhodopseudomonas sp. P2A-2r	2991972	S	23	8e-05	51	0.00013
Rhodopseudomonas sp. BAL398	3034676	S	38	0.00013	121	0.00031
Rhodopseudomonas boonkerdii	475937	S	45	0.00016	31	8e-05
[Pseudomonas] carboxydohydrogena	290	S	59	0.00021	432	0.00111
Afipia carboxidovorans	40137	S	113	0.0004	235	0.0006
Afipia sp. GAS231	1882747	S	30	0.00011	32	8e-05
Tardiphaga sp. 42S5	1404799	S	57	0.0002	34	9e-05
Tardiphaga alba	340268	S	17	6e-05	28	7e-05
Variibacter gotjawalensis	1333996	S	22	8e-05	29	7e-05
Mesorhizobium sp. WR6	3074855	S	961	0.00336	1503	0.00386
Mesorhizobium sp. 8	2584466	S	155	0.00054	170	0.00044
Mesorhizobium sp. J8	2777475	S	72	0.00025	101	0.00026
Mesorhizobium sp. AR07	2865838	S	74	0.00026	127	0.00033
Mesorhizobium sp. B2-1-1	2589974	S	55	0.00019	111	0.00028
Mesorhizobium sp. B2-8-5	2589903	S	53	0.00019	102	0.00026
Mesorhizobium sp. M1E.F.Ca.ET.045.02.1.1	2493672	S	71	0.00025	98	0.00025
Mesorhizobium sp. INR15	2654248	S	42	0.00015	67	0.00017
Mesorhizobium sp. M7D.F.Ca.US.005.01.1.1	2493678	S	51	0.00018	116	0.0003
Mesorhizobium sp. Pch-S	2082387	S	44	0.00015	46	0.00012
Mesorhizobium sp. DCY119	2108445	S	44	0.00015	73	0.00019
Mesorhizobium sp. M1D.F.Ca.ET.043.01.1.1	2493669	S	76	0.00027	69	0.00018
Mesorhizobium sp. M9A.F.Ca.ET.002.03.1.2	2493668	S	66	0.00023	87	0.00022
Mesorhizobium sp. M7A.F.Ce.TU.012.03.2.1	2493681	S	43	0.00015	68	0.00017
Mesorhizobium sp. B1-1-8	2589976	S	39	0.00014	52	0.00013
Mesorhizobium sp. M1B.F.Ca.ET.045.04.1.1	2493673	S	48	0.00017	86	0.00022
Mesorhizobium sp. L-2-11	2744521	S	56	0.0002	93	0.00024
Mesorhizobium sp. 131-2-1	2744518	S	60	0.00021	56	0.00014
Mesorhizobium sp. AR10	2865839	S	48	0.00017	63	0.00016
Mesorhizobium sp. M1A.F.Ca.IN.022.06.1.1	2493680	S	40	0.00014	51	0.00013
Mesorhizobium sp. B2-1-8	2589967	S	30	0.00011	28	7e-05
Mesorhizobium sp. M2A.F.Ca.ET.043.05.1.1	2493671	S	40	0.00014	38	0.0001
Mesorhizobium sp. PAMC28654	2880934	S	24	8e-05	68	0.00017
Mesorhizobium sp. 113-3-9	2744517	S	41	0.00014	37	9e-05
Mesorhizobium sp. AR02	2865837	S	28	0.0001	27	7e-05
Mesorhizobium sp. NZP2298	2483403	S	28	0.0001	107	0.00027
Mesorhizobium sp. NZP2077	2483404	S	24	8e-05	25	6e-05
Mesorhizobium sp. B4-1-4	2589888	S	20	7e-05	36	9e-05
Mesorhizobium sp. M3A.F.Ca.ET.080.04.2.1	2493676	S	24	8e-05	59	0.00015
Mesorhizobium sp. M4B.F.Ca.ET.058.02.1.1	2493675	S	23	8e-05	54	0.00014
Mesorhizobium sp. WSM1497	278153	S	55	0.00019	47	0.00012
Mesorhizobium sp. M8A.F.Ca.ET.057.01.1.1	2493679	S	19	7e-05	40	0.0001
Mesorhizobium sp. 113-1-2	2744515	S	19	7e-05	27	7e-05
Mesorhizobium sp. M6A.T.Cr.TU.016.01.1.1	2493677	S	23	8e-05	31	8e-05
Mesorhizobium sp. AA22	1854057	S	15	5e-05	37	9e-05
Mesorhizobium sp. 113-3-3	2744516	S	19	7e-05	43	0.00011
Mesorhizobium sp. M2A.F.Ca.ET.043.02.1.1	2493670	S	35	0.00012	55	0.00014
Mesorhizobium ciceri	39645	S	194	0.00068	346	0.00089
Mesorhizobium onobrychidis	2775404	S	59	0.00021	70	0.00018
Mesorhizobium terrae	2725666	S	64	0.00022	69	0.00018
Mesorhizobium opportunistum	593909	S	33	0.00012	48	0.00012
Mesorhizobium huakuii	28104	S	29	0.0001	33	8e-05
Mesorhizobium australicum	536018	S	21	7e-05	16	4e-05
Mesorhizobium amorphae	71433	S	17	6e-05	21	5e-05
Mesorhizobium japonicum	2066070	S	21	7e-05	18	5e-05
Mesorhizobium loti	381	S	24	8e-05	24	6e-05
Aminobacter sp. MSH1	374606	S	78	0.00027	103	0.00026
Aminobacter niigataensis	83265	S	35	0.00012	0	0
Phyllobacterium zundukense	1867719	S	47	0.00016	88	0.00023
Nitratireductor mangrovi	2599600	S	13	5e-05	30	8e-05
Nitratireductor rhodophyticola	2854036	S	60	0.00021	49	0.00013
Nitratireductor thuwali	2267699	S	13	5e-05	25	6e-05
Aquibium oceanicum	1670800	S	23	8e-05	26	7e-05
Aquibium microcysteis	675281	S	17	6e-05	36	9e-05
Chelativorans sp. AA-79	3028735	S	31	0.00011	38	0.0001
Rhizobium sp. BG4	2613770	S	78	0.00027	43	0.00011
Rhizobium sp. TH2	2775403	S	40	0.00014	58	0.00015
Rhizobium sp. WYJ-E13	2849093	S	16	6e-05	30	8e-05
Rhizobium sp. Pop5	1223565	S	47	0.00016	45	0.00012
Rhizobium sp. SL42	2806346	S	16	6e-05	13	3e-05
Rhizobium sp. 32-5/1	3019602	S	14	5e-05	14	4e-05
Rhizobium sp. SSA_523	2952477	S	14	5e-05	15	4e-05
Rhizobium sp. WL3	2603277	S	14	5e-05	12	3e-05
Rhizobium sp. 11515TR	2028343	S	17	6e-05	26	7e-05
Rhizobium sp. CB3090	3039156	S	29	0.0001	27	7e-05
Rhizobium leguminosarum	384	S	212	0.00074	207	0.00053
Rhizobium sullae	50338	S	26	9e-05	27	7e-05
Rhizobium etli	29449	S	35	0.00012	42	0.00011
Rhizobium jaguaris	1312183	S	16	6e-05	16	4e-05
Rhizobium phaseoli	396	S	21	7e-05	22	6e-05
Rhizobium rhizogenes	359	S	30	0.00011	48	0.00012
Rhizobium hidalgonense	1538159	S	13	5e-05	0	0
Rhizobium gallicum	56730	S	14	5e-05	30	8e-05
Rhizobium gei	1395951	S	11	4e-05	0	0
Agrobacterium tumefaciens	358	S	83	0.00029	102	0.00026
Agrobacterium fabrum	1176649	S	23	8e-05	0	0
Agrobacterium vitis	373	S	22	8e-05	28	7e-05
Neorhizobium galegae	399	S	34	0.00012	61	0.00016
Neorhizobium sp. CSC1952	2978974	S	13	5e-05	0	0
Neorhizobium petrolearium	515361	S	32	0.00011	41	0.00011
Allorhizobium pseudoryzae	379684	S	11	4e-05	13	3e-05
Sinorhizobium fredii	380	S	56	0.0002	75	0.00019
Sinorhizobium sp. RAC02	1842534	S	19	7e-05	25	6e-05
Sinorhizobium meliloti	382	S	49	0.00017	55	0.00014
Sinorhizobium medicae	110321	S	21	7e-05	21	5e-05
Sinorhizobium chiapasense	501572	S	13	5e-05	18	5e-05
Sinorhizobium alkalisoli	1752398	S	12	4e-05	17	4e-05
Sinorhizobium numidicum	680248	S	11	4e-05	13	3e-05
Ensifer adhaerens	106592	S	36	0.00013	45	0.00012
Ensifer canadensis	555315	S	13	5e-05	0	0
Shinella sp. HZN7	879274	S	126	0.00044	83	0.00021
Shinella sp. PSBB067	2715959	S	44	0.00015	0	0
Shinella sp. XGS7	2877941	S	26	9e-05	0	0
Shinella zoogloeoides	352475	S	241	0.00084	303	0.00078
Devosia sp. A16	1736675	S	272	0.00095	363	0.00093
Devosia sp. SL43	2806348	S	36	0.00013	80	0.00021
Devosia sp. SD17-2	2976459	S	47	0.00016	48	0.00012
Devosia sp. FJ2-5-3	2976680	S	38	0.00013	57	0.00015
Devosia sp. YIM 151766	3017325	S	83	0.00029	131	0.00034
Devosia sp.	1871048	S	28	0.0001	38	0.0001
Devosia sp. I507	2083786	S	43	0.00015	46	0.00012
Devosia sp. 1566	2499144	S	24	8e-05	48	0.00012
Devosia sp. J2-20	3026161	S	20	7e-05	14	4e-05
Devosia sp. RR2S18	3049774	S	18	6e-05	30	8e-05
Devosia sp. XK-2	3126689	S	19	7e-05	31	8e-05
Devosia ginsengisoli	400770	S	63	0.00022	65	0.00017
Devosia lacusdianchii	2917991	S	48	0.00017	58	0.00015
Devosia oryziradicis	2801335	S	36	0.00013	42	0.00011
Devosia salina	2860336	S	61	0.00021	75	0.00019
Devosia neptuniae	191302	S	26	9e-05	49	0.00013
Devosia beringensis	2657486	S	27	9e-05	40	0.0001
Devosia rhizoryzae	2774137	S	25	9e-05	25	6e-05
Devosia algicola	3026418	S	15	5e-05	20	5e-05
Devosia rhodophyticola	3026423	S	15	5e-05	14	4e-05
Pelagibacterium flavum	2984530	S	24	8e-05	20	5e-05
Youhaiella tibetensis	1447062	S	41	0.00014	62	0.00016
Paradevosia shaoguanensis	1335043	S	53	0.00019	84	0.00022
Methylobacterium sp. FF17	2984843	S	18	6e-05	27	7e-05
Methylobacterium sp. 17Sr1-1	2202826	S	35	0.00012	23	6e-05
Methylobacterium sp. WL1	2603276	S	17	6e-05	26	7e-05
Methylobacterium nodulans	114616	S	29	0.0001	24	6e-05
Methylobacterium aquaticum	270351	S	39	0.00014	44	0.00011
Methylobacterium radiodurans	2202828	S	24	8e-05	21	5e-05
Methylobacterium durans	2202825	S	22	8e-05	30	8e-05
Methylobacterium currus	2051553	S	29	0.0001	28	7e-05
Methylobacterium tardum	374432	S	36	0.00013	39	0.0001
Methylobacterium mesophilicum	39956	S	15	5e-05	33	8e-05
Methylobacterium bullatum	570505	S	12	4e-05	21	5e-05
Methylobacterium brachiatum	269660	S	24	8e-05	34	9e-05
Methylobacterium indicum	1775910	S	14	5e-05	20	5e-05
Microvirga sp. VF16	2807101	S	45	0.00016	34	9e-05
Microvirga sp. 17 mud 1-3	2082949	S	17	6e-05	22	6e-05
Microvirga ossetica	1882682	S	43	0.00015	54	0.00014
Microvirga terrae	2740529	S	25	9e-05	26	7e-05
Microvirga lotononidis	864069	S	20	7e-05	33	8e-05
Microvirga thermotolerans	2651334	S	14	5e-05	17	4e-05
Methylorubrum extorquens	408	S	45	0.00016	42	0.00011
Methylorubrum populi	223967	S	28	0.0001	29	7e-05
Pseudolabrys taiwanensis	331696	S	190	0.00067	292	0.00075
Pseudolabrys sp. FHR47	2562284	S	94	0.00033	183	0.00047
Ancylobacter sp. WKF20	3039801	S	16	6e-05	0	0
Ancylobacter novellus	921	S	14	5e-05	33	8e-05
Ancylobacter polymorphus	223390	S	28	0.0001	44	0.00011
Xanthobacter dioxanivorans	2528964	S	57	0.0002	54	0.00014
Starkeya sp. ORNL1	2709380	S	21	7e-05	29	7e-05
Labrys sp. KNU-23	2789216	S	19	7e-05	25	6e-05
Azorhizobium caulinodans	7	S	19	7e-05	20	5e-05
Aquabacter sp. L1I39	2820278	S	11	4e-05	12	3e-05
Bosea sp. ANAM02	2020412	S	102	0.00036	144	0.00037
Bosea sp. AS-1	2015316	S	38	0.00013	63	0.00016
Bosea sp. NBC_00550	2969621	S	26	9e-05	39	0.0001
Bosea sp. F3-2	2599640	S	26	9e-05	42	0.00011
Bosea sp. Tri-49	1867715	S	24	8e-05	39	0.0001
Bosea sp. PAMC 26642	1792307	S	20	7e-05	27	7e-05
Bosea sp. RAC05	1842539	S	32	0.00011	0	0
Bosea sp. 685	3080057	S	15	5e-05	23	6e-05
Bosea beijingensis	3068632	S	54	0.00019	128	0.00033
Bosea vestrisii	151416	S	21	7e-05	20	5e-05
Bosea vaviloviae	1526658	S	14	5e-05	22	6e-05
Rhodoplanes sp. Z2-YC6860	674703	S	146	0.00051	170	0.00044
Hyphomicrobium denitrificans	53399	S	81	0.00028	65	0.00017
Hyphomicrobium sp. MC1	717785	S	34	0.00012	75	0.00019
Hyphomicrobium sp. ghe19	2682968	S	13	5e-05	21	5e-05
Hyphomicrobium sp. DMF-1	3019544	S	13	5e-05	15	4e-05
Hyphomicrobium nitrativorans	1427356	S	13	5e-05	12	3e-05
Methyloligella sp. GL2	2742204	S	18	6e-05	12	3e-05
Enhydrobacter sp.	1894999	S	221	0.00077	371	0.00095
Nordella sp. HKS 07	2712222	S	51	0.00018	72	0.00018
Pseudorhodoplanes sinuspersici	1235591	S	38	0.00013	55	0.00014
Aureimonas populi	1701758	S	14	5e-05	14	4e-05
Jiella pelagia	2986949	S	17	6e-05	20	5e-05
Aurantimonas sp. HBX-1	2906072	S	15	5e-05	19	5e-05
Breoghania sp.	2065378	S	112	0.00039	207	0.00053
Breoghania sp. L-A4	2304600	S	14	5e-05	24	6e-05
Pannonibacter phragmitetus	121719	S	74	0.00026	78	0.0002
Methylocystis heyeri	391905	S	23	8e-05	0	0
Methylosinus trichosporium	426	S	15	5e-05	15	4e-05
Brucella sp. NM4	3045175	S	38	0.00013	0	0
Phreatobacter stygius	1940610	S	25	9e-05	27	7e-05
Phreatobacter cathodiphilus	1868589	S	16	6e-05	30	8e-05
Phreatobacter aquaticus	2570229	S	13	5e-05	15	4e-05
Methylovirgula sp. HY1	2822761	S	10	4e-05	10	3e-05
Methylovirgula ligni	569860	S	13	5e-05	16	4e-05
Kaustia mangrovi	2593653	S	17	6e-05	21	5e-05
Parvibaculum lavamentivorans	256618	S	22	8e-05	20	5e-05
Kaistia sp. 32K	2795690	S	45	0.00016	44	0.00011
Blastochloris tepida	2233851	S	18	6e-05	25	6e-05
Blastochloris viridis	1079	S	17	6e-05	20	5e-05
uncultured Pleomorphomonas sp.	442121	S	71	0.00025	39	0.0001
uncultured Cohaesibacter sp.	1002546	S	28	0.0001	36	9e-05
Chelatococcus sp. CO-6	1702325	S	20	7e-05	36	9e-05
Chelatococcus daeguensis	444444	S	12	4e-05	19	5e-05
Acuticoccus sp. I52.16.1	2928472	S	16	6e-05	33	8e-05
Acuticoccus sp. MNP-M23	3072793	S	10	4e-05	12	3e-05
Chenggangzhangella methanolivorans	1437009	S	13	5e-05	27	7e-05
Terrarubrum flagellatum	2895980	S	12	4e-05	29	7e-05
Sphingomonas sp. LY54	3095343	S	58	0.0002	103	0.00026
Sphingomonas sp. QA11	2950605	S	58	0.0002	135	0.00035
Sphingomonas sp. LY29	3095341	S	57	0.0002	138	0.00035
Sphingomonas sp. NIBR02145	3014784	S	57	0.0002	138	0.00035
Sphingomonas sp. 7/4-4	3018446	S	55	0.00019	115	0.0003
Sphingomonas sp. KRR8	2942996	S	48	0.00017	213	0.00055
Sphingomonas sp. LHG3406-1	2804617	S	39	0.00014	119	0.00031
Sphingomonas sp. CL5.1	2653203	S	47	0.00016	286	0.00073
Sphingomonas sp. LM7	1938607	S	35	0.00012	79	0.0002
Sphingomonas sp. MM-1	745310	S	157	0.00055	288	0.00074
Sphingomonas sp. So64.6b	2997354	S	31	0.00011	90	0.00023
Sphingomonas sp. R1	399176	S	41	0.00014	87	0.00022
Sphingomonas sp. NBWT7	2596913	S	54	0.00019	144	0.00037
Sphingomonas sp. AP4-R1	2735134	S	27	9e-05	75	0.00019
Sphingomonas sp. AAP5	1523415	S	38	0.00013	141	0.00036
Sphingomonas sp. S2-65	2903960	S	25	9e-05	58	0.00015
Sphingomonas sp. HDW15A	2714942	S	24	8e-05	96	0.00025
Sphingomonas sp. Y38-1Y	3078265	S	25	9e-05	81	0.00021
Sphingomonas sp. FARSPH	2219696	S	102	0.00036	282	0.00072
Sphingomonas sp. HMP6	1517551	S	25	9e-05	83	0.00021
Sphingomonas sp. SUN019	2937788	S	22	8e-05	59	0.00015
Sphingomonas sp. CV7422	3018036	S	39	0.00014	153	0.00039
Sphingomonas sp. M1-B02	3114300	S	19	7e-05	77	0.0002
Sphingomonas sp. J315	2898433	S	26	9e-05	70	0.00018
Sphingomonas sp. NY01	2968057	S	26	9e-05	65	0.00017
Sphingomonas sp. C3-2	3062169	S	18	6e-05	38	0.0001
Sphingomonas sp. KC8	1030157	S	18	6e-05	32	8e-05
Sphingomonas sp. PAMC26645	2565555	S	20	7e-05	52	0.00013
Sphingomonas sp. HMP9	1517554	S	18	6e-05	63	0.00016
Sphingomonas sp. SUN039	2937787	S	12	4e-05	44	0.00011
Sphingomonas sabuli	2764186	S	154	0.00054	337	0.00086
Sphingomonas lutea	1045317	S	148	0.00052	292	0.00075
Sphingomonas sediminicola	386874	S	105	0.00037	254	0.00065
Sphingomonas sinipercae	2714944	S	101	0.00035	241	0.00062
Sphingomonas flavescens	3132797	S	100	0.00035	303	0.00078
Sphingomonas daechungensis	1176646	S	76	0.00027	183	0.00047
Sphingomonas panacisoli	1813879	S	61	0.00021	379	0.00097
Sphingomonas piscis	2714943	S	47	0.00016	107	0.00027
Sphingomonas rhizophila	2071607	S	60	0.00021	139	0.00036
Sphingomonas ginsengisoli An et al. 2013	363835	S	42	0.00015	145	0.00037
Sphingomonas nostoxanthinifaciens	2872652	S	33	0.00012	88	0.00023
Sphingomonas kaistensis	298708	S	33	0.00012	60	0.00015
Sphingomonas psychrotolerans	1327635	S	32	0.00011	55	0.00014
Sphingomonas abietis	3012344	S	32	0.00011	188	0.00048
Sphingomonas panacis	1560345	S	31	0.00011	60	0.00015
Sphingomonas xanthus	2594473	S	40	0.00014	104	0.00027
Sphingomonas cannabina	2899123	S	34	0.00012	149	0.00038
Sphingomonas suaedae	2599297	S	28	0.0001	33	8e-05
Sphingomonas glaciei	2938948	S	28	0.0001	61	0.00016
Sphingomonas hengshuiensis	1609977	S	27	9e-05	55	0.00014
Sphingomonas morindae	1541170	S	24	8e-05	54	0.00014
Sphingomonas hankookensis	563996	S	117	0.00041	139	0.00036
Sphingomonas donggukensis	2949093	S	24	8e-05	66	0.00017
Sphingomonas profundi	2681549	S	23	8e-05	37	9e-05
Sphingomonas koreensis	93064	S	60	0.00021	93	0.00024
Sphingomonas alpina	653931	S	19	7e-05	99	0.00025
Sphingomonas sanxanigenens	397260	S	46	0.00016	147	0.00038
Sphingomonas changnyeongensis	2698679	S	18	6e-05	28	7e-05
Sphingomonas taxi	1549858	S	19	7e-05	53	0.00014
Sphingomonas aliaeris	2759526	S	16	6e-05	44	0.00011
Sphingomonas sanguinis	33051	S	27	9e-05	57	0.00015
Sphingomonas radiodurans	2890321	S	15	5e-05	43	0.00011
Sphingomonas aerolata	185951	S	17	6e-05	56	0.00014
Sphingomonas naphthae	1813468	S	46	0.00016	135	0.00035
Sphingomonas paucimobilis	13689	S	27	9e-05	96	0.00025
Sphingopyxis sp. USTB-05	2830667	S	49	0.00017	29	7e-05
Sphingopyxis sp. DBS4	2968500	S	65	0.00023	104	0.00027
Sphingopyxis sp. OPL5	2486273	S	26	9e-05	26	7e-05
Sphingopyxis sp. QXT-31	1357916	S	24	8e-05	36	9e-05
Sphingopyxis sp. PAMC25046	2565556	S	27	9e-05	31	8e-05
Sphingopyxis sp. BSN-002	2911495	S	17	6e-05	27	7e-05
Sphingopyxis sp. EG6	1874061	S	31	0.00011	42	0.00011
Sphingopyxis sp. YF1	2482763	S	16	6e-05	34	9e-05
Sphingopyxis sp. 113P3	292913	S	16	6e-05	38	0.0001
Sphingopyxis sp. FD7	1914525	S	14	5e-05	31	8e-05
Sphingopyxis macrogoltabida	33050	S	65	0.00023	71	0.00018
Sphingopyxis fribergensis	1515612	S	35	0.00012	46	0.00012
uncultured Sphingopyxis sp.	310581	S	18	6e-05	21	5e-05
Sphingopyxis indica	436663	S	47	0.00016	106	0.00027
Sphingopyxis granuli	267128	S	56	0.0002	115	0.0003
Sphingopyxis lindanitolerans	2054227	S	28	0.0001	43	0.00011
Sphingopyxis chilensis	180400	S	10	4e-05	21	5e-05
Sphingobium sp. Cam5-1	2789327	S	170	0.0006	295	0.00076
Sphingobium sp. AntQ-1	2930091	S	25	9e-05	27	7e-05
Sphingobium sp. EP60837	1855519	S	31	0.00011	75	0.00019
Sphingobium sp. SYK-6	627192	S	24	8e-05	36	9e-05
Sphingobium sp. TKS	1315974	S	62	0.00022	135	0.00035
Sphingobium sp. V4	3038927	S	17	6e-05	43	0.00011
Sphingobium sp. YG1	2082188	S	24	8e-05	29	7e-05
Sphingobium sp. CAP-1	2676077	S	28	0.0001	62	0.00016
Sphingobium sp. KCTC 72723	2733867	S	11	4e-05	0	0
Sphingobium yanoikuyae	13690	S	76	0.00027	170	0.00044
Sphingobium herbicidovorans	76947	S	58	0.0002	79	0.0002
Sphingobium amiense	135719	S	59	0.00021	47	0.00012
Sphingobium baderi	1332080	S	82	0.00029	174	0.00045
Sphingobium xenophagum	121428	S	24	8e-05	38	0.0001
Sphingobium phenoxybenzoativorans	1592790	S	15	5e-05	25	6e-05
Novosphingobium sp. Gsoil 351	2675225	S	20	7e-05	38	0.0001
Novosphingobium sp. ES2-1	2780074	S	31	0.00011	33	8e-05
Novosphingobium sp. THN1	1016987	S	17	6e-05	11	3e-05
Novosphingobium sp. P6W	1609758	S	11	4e-05	26	7e-05
Novosphingobium resinovorum	158500	S	122	0.00043	154	0.0004
Novosphingobium kaempferiae	2896849	S	17	6e-05	37	9e-05
Novosphingobium capsulatum	13688	S	19	7e-05	31	8e-05
Novosphingobium humi	2282397	S	11	4e-05	15	4e-05
Rhizorhabdus wittichii	160791	S	55	0.00019	112	0.00029
Rhizorhabdus dicambivorans	1850238	S	43	0.00015	56	0.00014
Rhizorhabdus phycosphaerae	2711156	S	14	5e-05	27	7e-05
Sphingomicrobium aestuariivivum	1582356	S	16	6e-05	21	5e-05
Allosphingosinicella indica	941907	S	24	8e-05	48	0.00012
Sphingosinithalassobacter sp. CS137	2762748	S	15	5e-05	28	7e-05
Stakelama sp. W311	3075605	S	16	6e-05	35	9e-05
Tardibacter chloracetimidivorans	1921510	S	29	0.0001	0	0
Erythrobacter sp.	1042	S	27	9e-05	33	8e-05
Erythrobacter sp. 3-20A1M	2653850	S	38	0.00013	27	7e-05
Erythrobacter litoralis	39960	S	33	0.00012	31	8e-05
Altererythrobacter sp. TH136	2067415	S	47	0.00016	66	0.00017
Tsuneonella amylolytica	2338327	S	30	0.00011	43	0.00011
Tsuneonella dongtanensis	692370	S	18	6e-05	44	0.00011
Tsuneonella mangrovi	1982042	S	10	4e-05	23	6e-05
Croceibacterium sp. D39	3064139	S	36	0.00013	55	0.00014
Pelagerythrobacter marensis	543877	S	23	8e-05	60	0.00015
Sphingosinicella sp. BN140058	1892855	S	24	8e-05	43	0.00011
Sphingosinicella microcystinivorans	335406	S	30	0.00011	62	0.00016
Sphingosinicella flava	2771430	S	12	4e-05	13	3e-05
Azospirillum sp. TSA2s	709810	S	224	0.00078	62	0.00016
Azospirillum sp. TSH100	652764	S	20	7e-05	20	5e-05
Azospirillum sp. B510	137722	S	14	5e-05	14	4e-05
Azospirillum oryzae	286727	S	39	0.00014	22	6e-05
Azospirillum brasilense	192	S	26	9e-05	53	0.00014
Azospirillum thermophilum	2202148	S	21	7e-05	28	7e-05
Azospirillum thiophilum	528244	S	12	4e-05	22	6e-05
Azospirillum ramasamyi	682998	S	11	4e-05	0	0
Azospirillum argentinense	2970906	S	12	4e-05	32	8e-05
Skermanella mucosa	1789672	S	19	7e-05	18	5e-05
Skermanella sp. TT6	2775420	S	79	0.00028	73	0.00019
Skermanella pratensis	2233999	S	14	5e-05	0	0
Indioceanicola profundi	2220096	S	11	4e-05	14	4e-05
Roseomonas marmotae	2768161	S	18	6e-05	20	5e-05
Roseomonas fluvialis	1750527	S	15	5e-05	24	6e-05
Roseomonas gilardii	257708	S	20	7e-05	32	8e-05
Roseomonas sp. OT10	2897332	S	20	7e-05	35	9e-05
Roseomonas haemaphysalidis	2768162	S	10	4e-05	15	4e-05
Rhodovastum atsumiense	504468	S	20	7e-05	28	7e-05
Pseudoroseomonas cervicalis	204525	S	12	4e-05	21	5e-05
Acidibrevibacterium fodinaquatile	1969806	S	12	4e-05	13	3e-05
Defluviicoccus vanus	111831	S	13	5e-05	0	0
Ferrovibrio terrae	2594003	S	10	4e-05	11	3e-05
Hypericibacter adhaerens	2602016	S	34	0.00012	38	0.0001
Hypericibacter terrae	2602015	S	22	8e-05	24	6e-05
Stella humosa	94	S	29	0.0001	38	0.0001
Paramagnetospirillum magneticum	84159	S	29	0.0001	0	0
Brevundimonas sp. NIBR11	3015999	S	23	8e-05	0	0
Brevundimonas sp. M20	2591463	S	11	4e-05	33	8e-05
Brevundimonas pondensis	2774189	S	78	0.00027	20	5e-05
Brevundimonas bullata	13160	S	42	0.00015	0	0
Brevundimonas subvibrioides	74313	S	13	5e-05	11	3e-05
Brevundimonas olei	657642	S	13	5e-05	0	0
Brevundimonas vitisensis	2800818	S	11	4e-05	15	4e-05
Caulobacter sp. S6	2823693	S	28	0.0001	60	0.00015
Caulobacter sp. NIBR1757	3016000	S	15	5e-05	29	7e-05
Caulobacter sp. NIBR2454	3015996	S	16	6e-05	27	7e-05
Caulobacter segnis	88688	S	57	0.0002	102	0.00026
Caulobacter rhizosphaerae	2010972	S	55	0.00019	66	0.00017
Caulobacter mirabilis	69666	S	26	9e-05	32	8e-05
Caulobacter vibrioides	155892	S	29	0.0001	26	7e-05
Caulobacter flavus	1679497	S	16	6e-05	34	9e-05
Caulobacter soli	2708539	S	15	5e-05	21	5e-05
Caulobacter henricii	69395	S	14	5e-05	13	3e-05
Phenylobacterium sp. LH3H17	2903901	S	51	0.00018	56	0.00014
Phenylobacterium sp. NIBR 498073	3015177	S	56	0.0002	37	9e-05
Phenylobacterium zucineum	284016	S	79	0.00028	125	0.00032
Phenylobacterium parvum	2201350	S	18	6e-05	19	5e-05
Asticcacaulis sp. AND118	2840468	S	12	4e-05	30	8e-05
Asticcacaulis excentricus	78587	S	17	6e-05	21	5e-05
Terricaulis silvestris	2686094	S	14	5e-05	23	6e-05
Rhodobacter capsulatus	1061	S	15	5e-05	13	3e-05
Polymorphum gilvum	991904	S	35	0.00012	17	4e-05
Cereibacter sphaeroides	1063	S	18	6e-05	21	5e-05
Limimaricola variabilis	1492771	S	22	8e-05	0	0
Paroceanicella profunda	2579971	S	33	0.00012	49	0.00013
Alloyangia pacifica	311180	S	15	5e-05	17	4e-05
Mameliella alba	561184	S	25	9e-05	0	0
uncultured Hyphomonas sp.	225298	S	16	6e-05	21	5e-05
Marinicauda algicola	2029849	S	18	6e-05	0	0
Tistrella mobilis	171437	S	11	4e-05	16	4e-05
Burkholderia multivorans	87883	S	125	0.00044	241	0.00062
Burkholderia ubonensis	101571	S	94	0.00033	207	0.00053
Burkholderia pyrrocinia	60550	S	77	0.00027	150	0.00038
Burkholderia cepacia	292	S	58	0.0002	131	0.00034
Burkholderia cenocepacia	95486	S	214	0.00075	252	0.00065
Burkholderia contaminans	488447	S	73	0.00026	132	0.00034
Burkholderia ambifaria	152480	S	60	0.00021	129	0.00033
Burkholderia stagnalis	1503054	S	40	0.00014	39	0.0001
Burkholderia anthina	179879	S	58	0.0002	114	0.00029
Burkholderia dolosa	152500	S	29	0.0001	57	0.00015
Burkholderia lata	482957	S	35	0.00012	71	0.00018
Burkholderia vietnamiensis	60552	S	109	0.00038	224	0.00057
Burkholderia stabilis	95485	S	38	0.00013	49	0.00013
Burkholderia latens	488446	S	19	7e-05	46	0.00012
Burkholderia arboris	488730	S	18	6e-05	25	6e-05
Burkholderia metallica	488729	S	18	6e-05	0	0
Burkholderia diffusa	488732	S	16	6e-05	15	4e-05
Burkholderia pseudomultivorans	1207504	S	15	5e-05	30	8e-05
Burkholderia territorii	1503055	S	13	5e-05	33	8e-05
Burkholderia seminalis	488731	S	12	4e-05	18	5e-05
Burkholderia pseudomallei	28450	S	140	0.00049	151	0.00039
Burkholderia thailandensis	57975	S	48	0.00017	55	0.00014
Burkholderia singularis	1503053	S	42	0.00015	69	0.00018
Burkholderia mayonis	1385591	S	32	0.00011	64	0.00016
Burkholderia oklahomensis	342113	S	15	5e-05	35	9e-05
Burkholderia sp. FERM BP-3421	1494466	S	37	0.00013	81	0.00021
Burkholderia sp. JP2-270	2217913	S	20	7e-05	31	8e-05
Burkholderia sp. LA-2-3-30-S1-D2	1637862	S	17	6e-05	27	7e-05
Burkholderia gladioli	28095	S	65	0.00023	121	0.00031
Burkholderia glumae	337	S	28	0.0001	60	0.00015
Burkholderia plantarii	41899	S	39	0.00014	62	0.00016
Paraburkholderia sp. SOS3	1926494	S	55	0.00019	110	0.00028
Paraburkholderia sp. SUR17	3034358	S	50	0.00018	109	0.00028
Paraburkholderia sp. PREW-6R	3141544	S	34	0.00012	149	0.00038
Paraburkholderia sp. IMGN_8	3136564	S	32	0.00011	231	0.00059
Paraburkholderia sp. D15	2880218	S	34	0.00012	151	0.00039
Paraburkholderia sp. FT54	3074437	S	27	9e-05	170	0.00044
Paraburkholderia sp. PGU19	2735434	S	35	0.00012	94	0.00024
Paraburkholderia pallida	2547399	S	53	0.00019	104	0.00027
Paraburkholderia tropica	92647	S	55	0.00019	91	0.00023
Paraburkholderia phenoliruptrix	252970	S	66	0.00023	229	0.00059
Paraburkholderia terricola	169427	S	56	0.0002	295	0.00076
Paraburkholderia graminis	60548	S	54	0.00019	248	0.00064
Paraburkholderia edwinii	2861782	S	45	0.00016	90	0.00023
Paraburkholderia acidiphila	2571747	S	49	0.00017	105	0.00027
Paraburkholderia fungorum	134537	S	87	0.0003	340	0.00087
Paraburkholderia sabiae	273251	S	45	0.00016	93	0.00024
Paraburkholderia acidisoli	2571748	S	43	0.00015	94	0.00024
Paraburkholderia caribensis	75105	S	45	0.00016	134	0.00034
Paraburkholderia megapolitana	420953	S	36	0.00013	90	0.00023
Paraburkholderia aromaticivorans	2026199	S	56	0.0002	447	0.00115
Paraburkholderia terrae	311230	S	60	0.00021	134	0.00034
Paraburkholderia phytofirmans	261302	S	77	0.00027	278	0.00071
Paraburkholderia phymatum	148447	S	51	0.00018	146	0.00037
Paraburkholderia atlantica	2654982	S	32	0.00011	193	0.0005
Paraburkholderia kururiensis	984307	S	37	0.00013	61	0.00016
Paraburkholderia dokdonensis	2211211	S	31	0.00011	53	0.00014
Paraburkholderia hospita	169430	S	49	0.00017	154	0.0004
Paraburkholderia sprentiae	948107	S	25	9e-05	186	0.00048
Paraburkholderia kirstenboschensis	1245436	S	27	9e-05	148	0.00038
Paraburkholderia caffeinilytica	1761016	S	26	9e-05	152	0.00039
Paraburkholderia bonniea	2152891	S	22	8e-05	37	9e-05
Paraburkholderia dioscoreae	2604047	S	29	0.0001	109	0.00028
Paraburkholderia bryophila	420952	S	20	7e-05	168	0.00043
Paraburkholderia caledonica	134536	S	17	6e-05	114	0.00029
Paraburkholderia xenovorans	36873	S	28	0.0001	243	0.00062
Cupriavidus taiwanensis	164546	S	80	0.00028	188	0.00048
Cupriavidus pauculus	82633	S	68	0.00024	114	0.00029
Cupriavidus basilensis	68895	S	43	0.00015	111	0.00028
Cupriavidus campinensis	151783	S	34	0.00012	58	0.00015
Cupriavidus necator	106590	S	21	7e-05	78	0.0002
Cupriavidus gilardii	82541	S	22	8e-05	34	9e-05
Cupriavidus cauae	2608999	S	30	0.00011	37	9e-05
Trinickia caryophylli	28094	S	109	0.00038	198	0.00051
Trinickia violacea	2571746	S	72	0.00025	114	0.00029
Caballeronia sp. TF1N1	2878153	S	34	0.00012	22	6e-05
Caballeronia sp. Lep1P3	2878150	S	26	9e-05	41	0.00011
Caballeronia insecticola	758793	S	24	8e-05	43	0.00011
Caballeronia grimmiae	1071679	S	66	0.00023	175	0.00045
Pandoraea pnomenusa	93220	S	65	0.00023	104	0.00027
Pandoraea thiooxydans	445709	S	17	6e-05	34	9e-05
Ralstonia solanacearum	305	S	27	9e-05	49	0.00013
Ralstonia mannitolilytica	105219	S	45	0.00016	64	0.00016
Ralstonia wenshanensis	2842456	S	14	5e-05	16	4e-05
Mycetohabitans endofungorum	417203	S	18	6e-05	27	7e-05
Variovorax sp. RA8	662548	S	135	0.00047	1282	0.00329
Variovorax sp. PBL-H6	434009	S	135	0.00047	2627	0.00674
Variovorax sp. HW608	1034889	S	23	8e-05	546	0.0014
Variovorax sp. PBS-H4	434008	S	92	0.00032	1567	0.00402
Variovorax sp. WDL1	207745	S	78	0.00027	1373	0.00352
Variovorax sp. PAMC 28711	1795631	S	18	6e-05	191	0.00049
Variovorax sp. 38R	2774875	S	35	0.00012	275	0.00071
Variovorax sp. RKNM96	2681552	S	14	5e-05	154	0.0004
Variovorax sp. PAMC26660	2762322	S	12	4e-05	144	0.00037
Variovorax paradoxus	34073	S	299	0.00105	2759	0.00708
Variovorax boronicumulans	436515	S	27	9e-05	245	0.00063
Ramlibacter tataouinensis	94132	S	153	0.00054	280	0.00072
Hydrogenophaga sp. SL48	2806347	S	18	6e-05	24	6e-05
Hydrogenophaga sp. BPS33	2651974	S	77	0.00027	688	0.00177
Hydrogenophaga sp. PBC	795665	S	32	0.00011	126	0.00032
Hydrogenophaga crocea	2716225	S	30	0.00011	86	0.00022
Acidovorax sp. KKS102	358220	S	51	0.00018	84	0.00022
Acidovorax sp. JMULE5	2518343	S	39	0.00014	56	0.00014
Rhodoferax sediminis	2509614	S	22	8e-05	53	0.00014
Rhodoferax sp. BAB1	2741720	S	16	6e-05	39	0.0001
Rhodoferax koreense	1842727	S	52	0.00018	469	0.0012
Delftia tsuruhatensis	180282	S	67	0.00023	188	0.00048
Polaromonas sp. JS666	296591	S	30	0.00011	67	0.00017
Polaromonas naphthalenivorans	216465	S	12	4e-05	27	7e-05
Paracidovorax avenae	80867	S	50	0.00018	102	0.00026
Ottowia oryzae	2109914	S	12	4e-05	38	0.0001
Simplicispira suum	2109915	S	41	0.00014	74	0.00019
Alicycliphilus denitrificans	179636	S	109	0.00038	209	0.00054
Massilia sp. R2A-15	3064278	S	29	0.0001	48	0.00012
Massilia sp. WG5	1707785	S	22	8e-05	82	0.00021
Massilia sp. NP310	2861282	S	21	7e-05	30	8e-05
Massilia sp. METH4	3123041	S	14	5e-05	19	5e-05
Massilia sp. PAMC28688	2861283	S	15	5e-05	37	9e-05
Massilia putida	1141883	S	142	0.0005	300	0.00077
Massilia violaceinigra	2045208	S	30	0.00011	32	8e-05
Massilia varians	457921	S	14	5e-05	35	9e-05
Massilia forsythiae	2728020	S	17	6e-05	41	0.00011
Massilia litorea	2769491	S	14	5e-05	24	6e-05
Massilia endophytica	2899220	S	11	4e-05	18	5e-05
Telluria mixta	34071	S	239	0.00084	253	0.00065
Telluria beijingensis	3068633	S	13	5e-05	25	6e-05
Pseudoduganella aquatica	2660641	S	24	8e-05	27	7e-05
Pseudoduganella lutea	321985	S	26	9e-05	17	4e-05
Pseudoduganella umbonata	864828	S	21	7e-05	20	5e-05
Pseudoduganella flava	871742	S	12	4e-05	28	7e-05
Pseudoduganella plicata	321984	S	13	5e-05	17	4e-05
Duganella dendranthematis	2728021	S	22	8e-05	20	5e-05
Rugamonas sp. DEMB1	3039386	S	24	8e-05	37	9e-05
Janthinobacterium sp. 17J80-10	2497863	S	12	4e-05	23	6e-05
Herbaspirillum hiltneri	341045	S	26	9e-05	16	4e-05
Collimonas arenae	279058	S	15	5e-05	20	5e-05
Collimonas pratensis	279113	S	13	5e-05	15	4e-05
Noviherbaspirillum sp. UKPF54	2601898	S	28	0.0001	51	0.00013
Achromobacter sp. MFA1 R4	1881016	S	42	0.00015	21	5e-05
Achromobacter sp. AONIH1	1758194	S	26	9e-05	45	0.00012
Achromobacter sp. 77	2756133	S	26	9e-05	0	0
Achromobacter spanius	217203	S	150	0.00053	133	0.00034
Achromobacter mucicolens	1389922	S	97	0.00034	37	9e-05
Achromobacter xylosoxidans	85698	S	86	0.0003	341	0.00087
Achromobacter deleyi	1353891	S	39	0.00014	26	7e-05
Achromobacter denitrificans	32002	S	40	0.00014	43	0.00011
Achromobacter insolitus	217204	S	23	8e-05	785	0.00201
Achromobacter veterisilvae	2069367	S	13	5e-05	23	6e-05
Achromobacter pestifer	1353889	S	27	9e-05	192	0.00049
Bordetella sp. N	1746199	S	17	6e-05	17	4e-05
Bordetella genomosp. 13	463040	S	31	0.00011	49	0.00013
Bordetella flabilis	463014	S	24	8e-05	21	5e-05
Bordetella hinzii	103855	S	28	0.0001	12	3e-05
Bordetella trematum	123899	S	21	7e-05	25	6e-05
Bordetella bronchialis	463025	S	19	7e-05	25	6e-05
Castellaniella defragrans	75697	S	44	0.00015	37	9e-05
Castellaniella sp. MT123	3140381	S	16	6e-05	0	0
Pigmentiphaga sp. CHJ604	3081984	S	19	7e-05	32	8e-05
Pollutimonas sp. M17	2962065	S	10	4e-05	25	6e-05
Paralcaligenes sp. KSB-10	2901142	S	10	4e-05	207	0.00053
Mitsuaria sp. 7	1658665	S	14	5e-05	47	0.00012
Roseateles sp. DAIF2	2714952	S	15	5e-05	32	8e-05
Paucibacter sediminis	3019553	S	30	0.00011	20	5e-05
Paucibacter aquatile	2070761	S	12	4e-05	17	4e-05
uncultured Roseateles sp.	452440	S	11	4e-05	35	9e-05
Piscinibacter gummiphilus	946333	S	94	0.00033	236	0.00061
Piscinibacter sp. XHJ-5	3037797	S	30	0.00011	52	0.00013
Schlegelella aquatica	376175	S	18	6e-05	24	6e-05
Caldimonas brevitalea	413882	S	12	4e-05	19	5e-05
Sphaerotilus sulfidivorans	639200	S	16	6e-05	22	6e-05
Sphaerotilus microaerophilus	2914710	S	22	8e-05	57	0.00015
Methylibium sp. Pch-M	2082386	S	14	5e-05	0	0
Rubrivivax gelatinosus	28068	S	20	7e-05	30	8e-05
Leptothrix cholodnii	34029	S	11	4e-05	26	7e-05
Ideonella dechloratans	36863	S	24	8e-05	16	4e-05
Inhella inkyongensis	392593	S	11	4e-05	0	0
Aquabacterium sp. J223	2898431	S	20	7e-05	23	6e-05
Xylophilus sp. GOD-11R	3089814	S	16	6e-05	26	7e-05
Rhizobacter sp. AJA081-3	2753607	S	13	5e-05	32	8e-05
Eleftheria terrae	1597781	S	13	5e-05	11	3e-05
Nitrosospira multiformis	1231	S	83	0.00029	68	0.00017
Nitrosospira lacus	1288494	S	83	0.00029	145	0.00037
Nitrosospira sp. Is2	3080532	S	44	0.00015	64	0.00016
Nitrosospira sp. NRS527	155925	S	24	8e-05	36	9e-05
Nitrosospira briensis	35799	S	18	6e-05	35	9e-05
Nitrosomonas sp.	42353	S	18	6e-05	0	0
Usitatibacter rugosus	2732067	S	24	8e-05	31	8e-05
Usitatibacter palustris	2732487	S	19	7e-05	24	6e-05
Azoarcus sp. KH32C	748247	S	19	7e-05	28	7e-05
Aromatoleum bremense	76115	S	17	6e-05	13	3e-05
Azospira restricta	404405	S	20	7e-05	24	6e-05
Ferribacterium limneticum	76259	S	16	6e-05	23	6e-05
Chitinimonas koreensis	356302	S	13	5e-05	17	4e-05
Streptomyces sp. NBC_01178	2903762	S	938	0.00328	821	0.00211
Streptomyces sp. NBC_01243	2903796	S	2599	0.0091	63664	0.16335
Streptomyces sp. NBC_01353	2903835	S	848	0.00297	478	0.00123
Streptomyces sp. NBC_01420	2903858	S	851	0.00298	416	0.00107
Streptomyces sp. NBC_01340	2903830	S	678	0.00237	457	0.00117
Streptomyces sp. NBC_01281	2903811	S	408	0.00143	263	0.00067
Streptomyces sp. NBC_01766	2975936	S	253	0.00089	119	0.00031
Streptomyces sp. NBC_00286	2975701	S	110	0.00039	128	0.00033
Streptomyces sp. NBC_00258	2903642	S	72	0.00025	149	0.00038
Streptomyces sp. NBC_01803	2975946	S	57	0.0002	79	0.0002
Streptomyces sp. WMMC500	3015154	S	56	0.0002	72	0.00018
Streptomyces sp. NBC_00322	2975712	S	66	0.00023	58	0.00015
Streptomyces sp. 891-h	2720714	S	53	0.00019	61	0.00016
Streptomyces sp. NHF165	2175864	S	45	0.00016	40	0.0001
Streptomyces sp. YIM 121038	2136401	S	58	0.0002	57	0.00015
Streptomyces sp. So13.3	2136173	S	48	0.00017	70	0.00018
Streptomyces sp. NA02950	2742137	S	49	0.00017	52	0.00013
Streptomyces sp. NBC_00490	2903657	S	48	0.00017	57	0.00015
Streptomyces sp. NBC_01352	2903834	S	49	0.00017	74	0.00019
Streptomyces sp. NBC_01262	2903803	S	44	0.00015	60	0.00015
Streptomyces sp. LX-29	2900152	S	46	0.00016	67	0.00017
Streptomyces sp. SN-593	659352	S	41	0.00014	77	0.0002
Streptomyces sp. Q6	3118173	S	42	0.00015	61	0.00016
Streptomyces sp. P3	2135430	S	47	0.00016	42	0.00011
Streptomyces sp. Rer75	2750011	S	39	0.00014	42	0.00011
Streptomyces sp. NBC_00223	2976008	S	37	0.00013	58	0.00015
Streptomyces sp. NBC_00582	2975783	S	50	0.00018	54	0.00014
Streptomyces sp. CdTB01	1725411	S	47	0.00016	56	0.00014
Streptomyces sp. NBC_01304	2903818	S	40	0.00014	55	0.00014
Streptomyces sp. NBC_01476	2903881	S	35	0.00012	70	0.00018
Streptomyces sp. ITFR-21	3075199	S	36	0.00013	47	0.00012
Streptomyces sp. SCUT-3	2684469	S	43	0.00015	45	0.00012
Streptomyces sp. CB01881	2078691	S	36	0.00013	48	0.00012
Streptomyces sp. NBC_01465	2903878	S	37	0.00013	40	0.0001
Streptomyces sp. NBC_01716	2975917	S	41	0.00014	25	6e-05
Streptomyces sp. NBC_01198	2903769	S	32	0.00011	61	0.00016
Streptomyces sp. NEAU-sy36	2751189	S	40	0.00014	33	8e-05
Streptomyces sp. Li-HN-5-11	3075432	S	39	0.00014	40	0.0001
Streptomyces sp. HUAS 15-9	2981136	S	36	0.00013	41	0.00011
Streptomyces sp. NBC_00588	2975784	S	41	0.00014	54	0.00014
Streptomyces sp. RerS4	2942449	S	36	0.00013	21	5e-05
Streptomyces sp. MST-110588	2833628	S	32	0.00011	41	0.00011
Streptomyces sp. NBC_01210	2903774	S	33	0.00012	34	9e-05
Streptomyces sp. VNUA116	3062449	S	43	0.00015	55	0.00014
Streptomyces sp. XD-27	3062779	S	38	0.00013	57	0.00015
Streptomyces sp. NBC_00576	2903665	S	32	0.00011	44	0.00011
Streptomyces sp. HUAS 14-6	2981135	S	38	0.00013	27	7e-05
Streptomyces sp. NBC_01351	2903833	S	36	0.00013	24	6e-05
Streptomyces sp. NBC_00370	2975728	S	37	0.00013	50	0.00013
Streptomyces sp. NBC_01478	2903882	S	34	0.00012	32	8e-05
Streptomyces sp. NBC_01216	2903778	S	35	0.00012	27	7e-05
Streptomyces sp. NBC_01429	2903862	S	36	0.00013	30	8e-05
Streptomyces sp. RTd22	1841249	S	31	0.00011	41	0.00011
Streptomyces sp. TLI_053	1855352	S	45	0.00016	47	0.00012
Streptomyces sp. NBC_01268	2903806	S	33	0.00012	49	0.00013
Streptomyces sp. NBC_00390	2975736	S	32	0.00011	34	9e-05
Streptomyces sp. NBC_00250	2903641	S	35	0.00012	43	0.00011
Streptomyces sp. GQFP	2907545	S	32	0.00011	50	0.00013
Streptomyces sp. NBC_00663	2975801	S	36	0.00013	37	9e-05
Streptomyces sp. NBC_00691	2903671	S	33	0.00012	28	7e-05
Streptomyces sp. NBC_00425	2975740	S	35	0.00012	30	8e-05
Streptomyces sp. C8S0	2585716	S	31	0.00011	48	0.00012
Streptomyces sp. A2-16	2781734	S	39	0.00014	34	9e-05
Streptomyces sp. NBC_00536	2975769	S	31	0.00011	40	0.0001
Streptomyces sp. NBC_00239	2903640	S	32	0.00011	45	0.00012
Streptomyces sp. HUAS YS2	3081768	S	30	0.00011	35	9e-05
Streptomyces sp. NBC_01497	2903885	S	27	9e-05	57	0.00015
Streptomyces sp. T12	477697	S	38	0.00013	57	0.00015
Streptomyces sp. W1SF4	2305220	S	31	0.00011	31	8e-05
Streptomyces sp. CGMCC 4.7035	3061628	S	34	0.00012	32	8e-05
Streptomyces sp. MUM 178J	2791991	S	37	0.00013	40	0.0001
Streptomyces sp. NBC_01335	2903828	S	29	0.0001	30	8e-05
Streptomyces sp. WAC 01438	2203204	S	35	0.00012	30	8e-05
Streptomyces sp. NA04227	2742136	S	30	0.00011	47	0.00012
Streptomyces sp. NBC_01431	2903863	S	33	0.00012	38	0.0001
Streptomyces sp. NBC_00670	2975804	S	33	0.00012	65	0.00017
Streptomyces sp. SAT1	1849967	S	31	0.00011	48	0.00012
Streptomyces sp. NBC_01477	2976015	S	25	9e-05	60	0.00015
Streptomyces sp. SCSIO ZS0520	2892996	S	28	0.0001	54	0.00014
Streptomyces sp. ST1015	1848900	S	29	0.0001	38	0.0001
Streptomyces sp. NBC_01235	2903788	S	33	0.00012	31	8e-05
Streptomyces sp. 3214.6	1882757	S	34	0.00012	29	7e-05
Streptomyces sp. M92	2944250	S	33	0.00012	14	4e-05
Streptomyces sp. NBC_00690	2975808	S	27	9e-05	36	9e-05
Streptomyces sp. NBC_01426	2975866	S	35	0.00012	34	9e-05
Streptomyces sp. NBC_00442	2903651	S	31	0.00011	33	8e-05
Streptomyces sp. BHT-5-2	2866715	S	26	9e-05	40	0.0001
Streptomyces sp. NBC_00669	2976011	S	26	9e-05	23	6e-05
Streptomyces sp. 11x1	3038642	S	31	0.00011	30	8e-05
Streptomyces sp. NBC_00285	2975700	S	28	0.0001	37	9e-05
Streptomyces sp. TG1A-60	3129111	S	31	0.00011	27	7e-05
Streptomyces sp. SCSIO 30461	3118085	S	31	0.00011	21	5e-05
Streptomyces sp. NBC_00190	2903634	S	30	0.00011	23	6e-05
Streptomyces sp. f51	1827742	S	33	0.00012	56	0.00014
Streptomyces sp. NBC_00287	2975702	S	27	9e-05	36	9e-05
Streptomyces sp. GS7	2692234	S	25	9e-05	49	0.00013
Streptomyces sp. NBC_00704	2975809	S	31	0.00011	41	0.00011
Streptomyces sp. NBC_01334	2903827	S	28	0.0001	34	9e-05
Streptomyces sp. CMB-StM0423	2059884	S	23	8e-05	26	7e-05
Streptomyces sp. NBC_01257	2903799	S	27	9e-05	22	6e-05
Streptomyces sp. NBC_01750	2975928	S	25	9e-05	33	8e-05
Streptomyces sp. NBC_01788	2975940	S	33	0.00012	47	0.00012
Streptomyces sp. NBC_01237	2903790	S	24	8e-05	37	9e-05
Streptomyces sp. JB150	2714844	S	26	9e-05	30	8e-05
Streptomyces sp. NBC_00316	2975710	S	23	8e-05	22	6e-05
Streptomyces sp. HM190	2695266	S	27	9e-05	27	7e-05
Streptomyces sp. GMY02	1333528	S	23	8e-05	33	8e-05
Streptomyces sp. NBC_01317	2903822	S	27	9e-05	37	9e-05
Streptomyces sp. NBC_01244	2903797	S	26	9e-05	22	6e-05
Streptomyces sp. NBC_00344	2975720	S	22	8e-05	25	6e-05
Streptomyces sp. CA-210063	2801029	S	24	8e-05	27	7e-05
Streptomyces sp. HUAS CB01	3053466	S	27	9e-05	21	5e-05
Streptomyces sp. Z423-1	2730915	S	25	9e-05	48	0.00012
Streptomyces sp. NBC_00820	2975842	S	24	8e-05	28	7e-05
Streptomyces sp. NBC_00234	2903638	S	25	9e-05	29	7e-05
Streptomyces sp. NBC_00162	2903629	S	25	9e-05	30	8e-05
Streptomyces sp. NBC_00455	2903654	S	25	9e-05	28	7e-05
Streptomyces sp. NBC_00435	2903649	S	25	9e-05	21	5e-05
Streptomyces sp. NBC_01294	2903815	S	27	9e-05	22	6e-05
Streptomyces sp. WAC 01529	2203205	S	24	8e-05	27	7e-05
Streptomyces sp. NBC_01343	2903832	S	25	9e-05	26	7e-05
Streptomyces sp. NBC_01341	2903831	S	23	8e-05	23	6e-05
Streptomyces sp. Caat 7-52	2949637	S	26	9e-05	27	7e-05
Streptomyces sp. NBC_00448	2903652	S	22	8e-05	37	9e-05
Streptomyces sp. N50	3081765	S	22	8e-05	22	6e-05
Streptomyces sp. FZ201	3057122	S	25	9e-05	37	9e-05
Streptomyces sp. NBC_00259	2903643	S	24	8e-05	44	0.00011
Streptomyces sp. NBC_01451	2903872	S	20	7e-05	37	9e-05
Streptomyces sp. QHH-9511	2684468	S	22	8e-05	27	7e-05
Streptomyces sp. Mut1	3033811	S	25	9e-05	39	0.0001
Streptomyces sp. NBC_01288	2903814	S	22	8e-05	24	6e-05
Streptomyces sp. NBC_01723	2975921	S	24	8e-05	33	8e-05
Streptomyces sp. Go-475	2072505	S	26	9e-05	31	8e-05
Streptomyces sp. NBC_00557	2975776	S	23	8e-05	40	0.0001
Streptomyces sp. NBC_01217	2903779	S	22	8e-05	23	6e-05
Streptomyces sp. AM 4-1-1	3028710	S	20	7e-05	19	5e-05
Streptomyces sp. Go40/10	2825844	S	22	8e-05	39	0.0001
Streptomyces sp. NBC_00459	2975749	S	18	6e-05	46	0.00012
Streptomyces sp. NBC_01498	2975870	S	24	8e-05	28	7e-05
Streptomyces sp. 71268	3002640	S	23	8e-05	22	6e-05
Streptomyces sp. fd1-xmd	1812480	S	24	8e-05	15	4e-05
Streptomyces sp. WAC 06738	2203210	S	18	6e-05	25	6e-05
Streptomyces sp. WZ-12	3030210	S	18	6e-05	45	0.00012
Streptomyces sp. NBC_01361	2903838	S	22	8e-05	22	6e-05
Streptomyces sp. NBC_01435	2903865	S	21	7e-05	21	5e-05
Streptomyces sp. NBC_01233	2903787	S	20	7e-05	16	4e-05
Streptomyces sp. NBC_01460	2903875	S	19	7e-05	31	8e-05
Streptomyces sp. FXJ1.172	710705	S	21	7e-05	22	6e-05
Streptomyces sp. ADI95-16	1522758	S	35	0.00012	16	4e-05
Streptomyces sp. NBC_01485	2903884	S	20	7e-05	32	8e-05
Streptomyces sp. NBC_00358	2975725	S	21	7e-05	37	9e-05
Streptomyces sp. HP-A2021	2927875	S	24	8e-05	33	8e-05
Streptomyces sp. NBC_00247	2975689	S	18	6e-05	23	6e-05
Streptomyces sp. NBC_00503	2903659	S	19	7e-05	25	6e-05
Streptomyces sp. KMM 9044	2744474	S	20	7e-05	23	6e-05
Streptomyces sp. FIT100	2837956	S	22	8e-05	26	7e-05
Streptomyces sp. DSM 40868	2721173	S	21	7e-05	32	8e-05
Streptomyces sp. Je 1-369	2966192	S	19	7e-05	13	3e-05
Streptomyces sp. NBC_00354	2975723	S	21	7e-05	22	6e-05
Streptomyces sp. Tu 2975	2676871	S	22	8e-05	29	7e-05
Streptomyces sp. NBC_01808	2975947	S	15	5e-05	31	8e-05
Streptomyces sp. NBC_00467	2975752	S	16	6e-05	0	0
Streptomyces sp. NBC_01296	2903816	S	19	7e-05	17	4e-05
Streptomyces sp. SS7	3108485	S	22	8e-05	43	0.00011
Streptomyces sp. NBC_01320	2903824	S	16	6e-05	19	5e-05
Streptomyces sp. NBC_00178	2975672	S	17	6e-05	25	6e-05
Streptomyces sp. BPTC-684	3043734	S	22	8e-05	20	5e-05
Streptomyces sp. CL7	3096006	S	21	7e-05	16	4e-05
Streptomyces sp. SJL17-4	2967224	S	19	7e-05	28	7e-05
Streptomyces sp. NBC_00683	2903670	S	16	6e-05	22	6e-05
Streptomyces sp. NBC_01356	2903836	S	15	5e-05	21	5e-05
Streptomyces sp. MMBL 11-1	3026420	S	20	7e-05	15	4e-05
Streptomyces sp. NBC_00376	2975730	S	15	5e-05	20	5e-05
Streptomyces sp. NBC_00443	2975743	S	18	6e-05	30	8e-05
Streptomyces sp. NBC_00299	2975705	S	18	6e-05	34	9e-05
Streptomyces sp. NBC_01236	2903789	S	18	6e-05	23	6e-05
Streptomyces sp. NBC_00414	2975739	S	16	6e-05	35	9e-05
Streptomyces sp. SM18	1736046	S	18	6e-05	27	7e-05
Streptomyces sp. NBC_00841	2975847	S	16	6e-05	13	3e-05
Streptomyces sp. PCS3-D2	1460244	S	17	6e-05	30	8e-05
Streptomyces sp. BB1-1-1	3074430	S	19	7e-05	27	7e-05
Streptomyces sp. NBC_00335	2975714	S	17	6e-05	28	7e-05
Streptomyces sp. NBC_00525	2903660	S	17	6e-05	31	8e-05
Streptomyces sp. NBC_01754	2975930	S	14	5e-05	23	6e-05
Streptomyces sp. MRC013	2898276	S	17	6e-05	20	5e-05
Streptomyces sp. NBC_00457	2975748	S	24	8e-05	16	4e-05
Streptomyces sp. YPW6	2840373	S	18	6e-05	16	4e-05
Streptomyces sp. LRE541	2931983	S	21	7e-05	17	4e-05
Streptomyces sp. NBC_00523	2975765	S	18	6e-05	12	3e-05
Streptomyces sp. NBC_00569	2975780	S	22	8e-05	0	0
Streptomyces sp. NBC_01232	2903786	S	16	6e-05	24	6e-05
Streptomyces sp. CCM_MD2014	1561022	S	19	7e-05	14	4e-05
Streptomyces sp. NBC_01255	2903798	S	15	5e-05	23	6e-05
Streptomyces sp. ITFR-6	3075197	S	15	5e-05	24	6e-05
Streptomyces sp. CNQ-509	444103	S	13	5e-05	16	4e-05
Streptomyces sp. NBC_01298	2903817	S	16	6e-05	21	5e-05
Streptomyces sp. NBC_00151	2975669	S	16	6e-05	0	0
Streptomyces sp. NBC_01450	2903871	S	16	6e-05	19	5e-05
Streptomyces sp. NBC_00483	2975756	S	14	5e-05	26	7e-05
Streptomyces sp. FXY-T5	3064901	S	16	6e-05	24	6e-05
Streptomyces sp. SUK 48	2582831	S	17	6e-05	14	4e-05
Streptomyces sp. SCA4-21	3026192	S	15	5e-05	11	3e-05
Streptomyces sp. TN58	234612	S	14	5e-05	18	5e-05
Streptomyces sp. SH5	3041765	S	17	6e-05	11	3e-05
Streptomyces sp. NBC_00441	2975742	S	14	5e-05	16	4e-05
Streptomyces sp. DSM 40750	2801030	S	12	4e-05	21	5e-05
Streptomyces sp. NBC_00388	2975735	S	13	5e-05	28	7e-05
Streptomyces sp. SCSIO 75703	3112165	S	13	5e-05	47	0.00012
Streptomyces sp. DG1A-41	3125779	S	15	5e-05	27	7e-05
Streptomyces laculatispora	887464	S	2395	0.00838	1594	0.00409
Streptomyces canus	58343	S	125	0.00044	232	0.0006
Streptomyces aurantiacus	47760	S	40	0.00014	69	0.00018
Streptomyces pseudovenezuelae	67350	S	32	0.00011	33	8e-05
Streptomyces alboniger	132473	S	24	8e-05	18	5e-05
Streptomyces phaeoluteigriseus	114686	S	18	6e-05	44	0.00011
Streptomyces cadmiisoli	2184053	S	15	5e-05	34	9e-05
Streptomyces tauricus	68274	S	21	7e-05	23	6e-05
Streptomyces anulatus	1892	S	96	0.00034	62	0.00016
Streptomyces cyaneofuscatus	66883	S	47	0.00016	32	8e-05
Streptomyces graminofaciens	68212	S	17	6e-05	28	7e-05
Streptomyces griseus	1911	S	18	6e-05	22	6e-05
Streptomyces uncialis	1048205	S	109	0.00038	80	0.00021
Streptomyces venezuelae	54571	S	107	0.00037	127	0.00033
Streptomyces rapamycinicus	1226757	S	26	9e-05	35	9e-05
Streptomyces hygroscopicus	1912	S	32	0.00011	53	0.00014
Streptomyces yatensis	155177	S	22	8e-05	18	5e-05
Streptomyces bathyalis	2710756	S	47	0.00016	63	0.00016
Streptomyces marincola	2878388	S	41	0.00014	51	0.00013
Streptomyces collinus	42684	S	62	0.00022	48	0.00012
Streptomyces griseorubiginosus	67304	S	56	0.0002	57	0.00015
Streptomyces phaeochromogenes	1923	S	43	0.00015	37	9e-05
Streptomyces olivoreticuli	68246	S	46	0.00016	37	9e-05
Streptomyces tsukubensis	83656	S	39	0.00014	48	0.00012
Streptomyces europaeiscabiei	146819	S	41	0.00014	58	0.00015
Streptomyces xinghaiensis	1038928	S	42	0.00015	39	0.0001
Streptomyces noursei	1971	S	66	0.00023	49	0.00013
Streptomyces formicae	1616117	S	39	0.00014	46	0.00012
Streptomyces tanashiensis	67367	S	37	0.00013	28	7e-05
Streptomyces chartreusis	1969	S	43	0.00015	77	0.0002
Streptomyces halobius	2879846	S	28	0.0001	41	0.00011
Streptomyces armeniacus	83291	S	25	9e-05	38	0.0001
Streptomyces rimosus	1927	S	27	9e-05	36	9e-05
Streptomyces cyaneochromogenes	2496836	S	39	0.00014	29	7e-05
Streptomyces profundus	2867410	S	24	8e-05	37	9e-05
Streptomyces inhibens	2293571	S	29	0.0001	34	9e-05
Streptomyces roseirectus	2768066	S	29	0.0001	32	8e-05
Streptomyces tubbatahanensis	2923272	S	26	9e-05	29	7e-05
Streptomyces niveus	193462	S	30	0.00011	45	0.00012
Streptomyces zaomyceticus	68286	S	28	0.0001	40	0.0001
Streptomyces netropsis	55404	S	32	0.00011	31	8e-05
Streptomyces spectabilis	68270	S	29	0.0001	58	0.00015
Streptomyces longwoodensis	68231	S	33	0.00012	37	9e-05
Streptomyces luteoverticillatus	66425	S	30	0.00011	28	7e-05
Streptomyces griseocarneus	51201	S	26	9e-05	19	5e-05
Streptomyces coeruleorubidus	116188	S	32	0.00011	42	0.00011
Streptomyces gilvosporeus	553510	S	24	8e-05	19	5e-05
Streptomyces virginiae	1961	S	56	0.0002	47	0.00012
Streptomyces lincolnensis	1915	S	31	0.00011	18	5e-05
Streptomyces hirsutus	35620	S	24	8e-05	15	4e-05
Streptomyces seoulensis	73044	S	32	0.00011	20	5e-05
Streptomyces rectiverticillatus	173860	S	27	9e-05	35	9e-05
Streptomyces harbinensis	1176198	S	21	7e-05	30	8e-05
Streptomyces buecherae	2763006	S	26	9e-05	29	7e-05
Streptomyces ambofaciens	1889	S	29	0.0001	27	7e-05
Streptomyces cynarae	2981134	S	24	8e-05	27	7e-05
Streptomyces calvus	67282	S	26	9e-05	16	4e-05
Streptomyces aureoverticillatus	66871	S	23	8e-05	24	6e-05
Streptomyces angustmyceticus	285578	S	25	9e-05	34	9e-05
Streptomyces nigra	1827580	S	28	0.0001	32	8e-05
Streptomyces albus	1888	S	19	7e-05	31	8e-05
Streptomyces durmitorensis	319947	S	20	7e-05	40	0.0001
Streptomyces jietaisiensis	235987	S	25	9e-05	48	0.00012
Streptomyces dengpaensis	2049881	S	22	8e-05	22	6e-05
Streptomyces acidiscabies	42234	S	24	8e-05	31	8e-05
Streptomyces griseoviridis	45398	S	26	9e-05	33	8e-05
Streptomyces lydicus	47763	S	37	0.00013	58	0.00015
Streptomyces roseicoloratus	2508722	S	22	8e-05	23	6e-05
Streptomyces incarnatus	665007	S	19	7e-05	20	5e-05
Streptomyces peucetius	1950	S	22	8e-05	26	7e-05
Streptomyces ferrugineus	1413221	S	22	8e-05	20	5e-05
Streptomyces alfalfae	1642299	S	22	8e-05	41	0.00011
Streptomyces subrutilus	36818	S	22	8e-05	19	5e-05
Streptomyces pristinaespiralis	38300	S	24	8e-05	19	5e-05
Streptomyces clavuligerus	1901	S	20	7e-05	28	7e-05
Streptomyces camelliae	3004093	S	22	8e-05	24	6e-05
Streptomyces qinzhouensis	2599401	S	19	7e-05	18	5e-05
Streptomyces actuosus	1885	S	21	7e-05	27	7e-05
Streptomyces decoyicus	249567	S	28	0.0001	38	0.0001
Streptomyces paludis	2282738	S	20	7e-05	17	4e-05
Streptomyces xanthophaeus	67385	S	25	9e-05	36	9e-05
Streptomyces tubercidicus	47759	S	21	7e-05	32	8e-05
Streptomyces kanamyceticus	1967	S	19	7e-05	25	6e-05
Streptomyces fodineus	1904616	S	19	7e-05	21	5e-05
Streptomyces mobaraensis	35621	S	23	8e-05	20	5e-05
Streptomyces alboflavus	67267	S	21	7e-05	38	0.0001
Streptomyces lunaelactis	1535768	S	15	5e-05	28	7e-05
Streptomyces lavendulae	1914	S	19	7e-05	32	8e-05
Streptomyces antibioticus	1890	S	24	8e-05	31	8e-05
Streptomyces griseochromogenes	68214	S	20	7e-05	23	6e-05
Streptomyces coralus	66880	S	23	8e-05	25	6e-05
Streptomyces cathayae	3031124	S	17	6e-05	18	5e-05
Streptomyces phaeolivaceus	2653200	S	19	7e-05	10	3e-05
Streptomyces gobiensis	2875706	S	15	5e-05	27	7e-05
Streptomyces tuirus	68278	S	21	7e-05	16	4e-05
Streptomyces dangxiongensis	1442032	S	18	6e-05	15	4e-05
Streptomyces aquilus	2548456	S	20	7e-05	19	5e-05
Streptomyces broussonetiae	2686304	S	19	7e-05	23	6e-05
Streptomyces flavofungini	68200	S	40	0.00014	67	0.00017
Streptomyces nojiriensis	66374	S	26	9e-05	27	7e-05
Streptomyces scopuliridis	452529	S	17	6e-05	21	5e-05
Streptomyces vietnamensis	362257	S	18	6e-05	36	9e-05
Streptomyces katrae	68223	S	16	6e-05	22	6e-05
Streptomyces liangshanensis	2717324	S	16	6e-05	24	6e-05
Streptomyces asoensis	249586	S	19	7e-05	24	6e-05
Streptomyces tirandamycinicus	2174846	S	17	6e-05	15	4e-05
Streptomyces platensis	58346	S	24	8e-05	18	5e-05
Streptomyces genisteinicus	2768068	S	17	6e-05	26	7e-05
Streptomyces liliifuscus	2797636	S	16	6e-05	25	6e-05
Streptomyces yangpuensis	1648182	S	17	6e-05	14	4e-05
Streptomyces violaceus	1936	S	33	0.00012	24	6e-05
Streptomyces ficellus	1977088	S	16	6e-05	13	3e-05
Streptomyces glaucescens	1907	S	16	6e-05	29	7e-05
Streptomyces nodosus	40318	S	14	5e-05	18	5e-05
Streptomyces roseochromogenus	285450	S	15	5e-05	11	3e-05
Streptomyces davaonensis	348043	S	14	5e-05	18	5e-05
Streptomyces leeuwenhoekii	1437453	S	18	6e-05	18	5e-05
Streptomyces brevispora	887462	S	14	5e-05	23	6e-05
Streptomyces vilmorinianum	3051092	S	14	5e-05	17	4e-05
Streptomyces nitrosporeus	28894	S	14	5e-05	27	7e-05
Streptomyces erythrochromogenes	285574	S	16	6e-05	14	4e-05
Streptomyces spongiicola	1690221	S	14	5e-05	21	5e-05
Streptomyces cinnabarinus	67287	S	15	5e-05	13	3e-05
Streptomyces melanogenes	67326	S	15	5e-05	21	5e-05
Streptomyces akebiae	2865673	S	14	5e-05	15	4e-05
Streptomyces xanthii	2768069	S	13	5e-05	33	8e-05
Streptomyces fagopyri	2662397	S	13	5e-05	20	5e-05
Streptomyces antimycoticus	68175	S	47	0.00016	0	0
Kitasatospora sp. NA04385	2742135	S	26	9e-05	20	5e-05
Kitasatospora sp. NBC_01246	2903570	S	23	8e-05	29	7e-05
Kitasatospora sp. CM 4170	3075627	S	19	7e-05	39	0.0001
Kitasatospora sp. MMS16-BH015	2018025	S	15	5e-05	41	0.00011
Kitasatospora sp. NBC_00458	2903568	S	18	6e-05	32	8e-05
Kitasatospora sp. NBC_01266	2903572	S	13	5e-05	25	6e-05
Kitasatospora sp. YST-16	2998080	S	18	6e-05	21	5e-05
Kitasatospora purpeofusca	67352	S	31	0.00011	33	8e-05
Kitasatospora setae	2066	S	17	6e-05	16	4e-05
Kitasatospora herbaricolor	68217	S	15	5e-05	12	3e-05
Streptacidiphilus sp. PB12-B1b	2705012	S	20	7e-05	24	6e-05
Streptacidiphilus sp. P02-A3a	2704468	S	13	5e-05	28	7e-05
Actinacidiphila glaucinigra	235986	S	19	7e-05	32	8e-05
Embleya sp. NBC_00888	2975960	S	12	4e-05	12	3e-05
Yinghuangia sp. ASG 101	2896848	S	15	5e-05	34	9e-05
Peterkaempfera bronchialis	2126346	S	14	5e-05	22	6e-05
Microbacterium sp. LWH13-1.2	3135260	S	82	0.00029	57	0.00015
Microbacterium sp. LWH7-1.2	3135257	S	30	0.00011	46	0.00012
Microbacterium sp. AZCO	3142976	S	25	9e-05	53	0.00014
Microbacterium sp. No. 7	1714373	S	52	0.00018	103	0.00026
Microbacterium sp. LWH11-1.2	3135258	S	34	0.00012	50	0.00013
Microbacterium sp. YJN-G	2763257	S	38	0.00013	100	0.00026
Microbacterium sp. NIBRBAC000506063	2734618	S	143	0.0005	67	0.00017
Microbacterium sp. zg-Y818	3049072	S	23	8e-05	49	0.00013
Microbacterium sp. AB	2981139	S	18	6e-05	29	7e-05
Microbacterium sp. LWH10-1.2	3135255	S	28	0.0001	82	0.00021
Microbacterium sp. LWO13-1.2	3135262	S	19	7e-05	45	0.00012
Microbacterium sp. Y-01	2048898	S	34	0.00012	42	0.00011
Microbacterium sp. 10M-3C3	2483401	S	26	9e-05	66	0.00017
Microbacterium sp. PM5	2014534	S	16	6e-05	35	9e-05
Microbacterium sp. ABRD28	2268461	S	17	6e-05	32	8e-05
Microbacterium sp. JZ37	2654193	S	18	6e-05	24	6e-05
Microbacterium sp. H1-D42	2925844	S	15	5e-05	32	8e-05
Microbacterium sp. nov. GSS16	3019890	S	54	0.00019	94	0.00024
Microbacterium sp. KUDC0406	2909588	S	14	5e-05	62	0.00016
Microbacterium sp. 4R-513	2567934	S	14	5e-05	44	0.00011
Microbacterium sp. LWO14-1.2	3135263	S	23	8e-05	55	0.00014
Microbacterium sp. BH-3-3-3	1906742	S	14	5e-05	29	7e-05
Microbacterium sp. zg-B185	3049070	S	13	5e-05	47	0.00012
Microbacterium sp. JZ31	1906274	S	13	5e-05	36	9e-05
Microbacterium sp. zg-Y1090	3049073	S	13	5e-05	32	8e-05
Microbacterium sp. XT11	367477	S	12	4e-05	47	0.00012
Microbacterium azadirachtae	582680	S	66	0.00023	312	0.0008
Microbacterium protaetiae	2509458	S	55	0.00019	104	0.00027
Microbacterium testaceum	2033	S	46	0.00016	65	0.00017
Microbacterium rhizosphaerae	1678237	S	38	0.00013	130	0.00033
Microbacterium hydrocarbonoxydans	273678	S	37	0.00013	26	7e-05
Microbacterium foliorum	104336	S	73	0.00026	130	0.00033
Microbacterium galbinum	2851646	S	26	9e-05	20	5e-05
Microbacterium terricola	344163	S	25	9e-05	47	0.00012
Microbacterium elymi	2909587	S	26	9e-05	60	0.00015
Microbacterium hominis	162426	S	114	0.0004	231	0.00059
Microbacterium oxydans	82380	S	49	0.00017	151	0.00039
Microbacterium lemovicicum	1072463	S	20	7e-05	31	8e-05
Microbacterium horticulturae	3028316	S	23	8e-05	59	0.00015
Microbacterium esteraromaticum	57043	S	21	7e-05	50	0.00013
Microbacterium wangchenii	2541726	S	17	6e-05	18	5e-05
Microbacterium proteolyticum	1572644	S	63	0.00022	56	0.00014
Microbacterium caowuchunii	2614638	S	16	6e-05	37	9e-05
Microbacterium pygmaeum	370764	S	14	5e-05	23	6e-05
Microbacterium luteolum	69367	S	15	5e-05	21	5e-05
Microbacterium limosum	3079935	S	25	9e-05	24	6e-05
Microbacterium suwonense	683047	S	19	7e-05	44	0.00011
Microbacterium chocolatum	84292	S	47	0.00016	27	7e-05
Microbacterium cremeum	2782169	S	11	4e-05	36	9e-05
Microbacterium sufflavum	2851649	S	12	4e-05	21	5e-05
Microbacterium resistens	156977	S	11	4e-05	31	8e-05
Leifsonia sp. 21MFCrub1.1	1798223	S	603	0.00211	1473	0.00378
Leifsonia sp. PS1209	2724914	S	179	0.00063	448	0.00115
Leifsonia sp. ZF2019	2781978	S	158	0.00055	402	0.00103
Leifsonia shinshuensis	150026	S	119	0.00042	295	0.00076
Leifsonia xyli	1575	S	43	0.00015	61	0.00016
Curtobacterium sp. BH-2-1-1	1905847	S	32	0.00011	201	0.00052
Curtobacterium sp. DN_7.5	3049047	S	29	0.0001	29	7e-05
Curtobacterium sp. 458	3050069	S	23	8e-05	27	7e-05
Curtobacterium sp. MCLR17_036	2175620	S	21	7e-05	20	5e-05
Curtobacterium flaccumfaciens	2035	S	39	0.00014	57	0.00015
Agromyces sp. LHK192	2498704	S	24	8e-05	54	0.00014
Agromyces sp. H17E-10	2932244	S	20	7e-05	49	0.00013
Agromyces protaetiae	2509455	S	32	0.00011	84	0.00022
Agromyces flavus	589382	S	26	9e-05	38	0.0001
Agromyces laixinhei	2585717	S	19	7e-05	39	0.0001
Agromyces archimandritae	2781962	S	16	6e-05	30	8e-05
Agromyces larvae	2929802	S	20	7e-05	28	7e-05
Agromyces mangrovi	1858653	S	14	5e-05	34	9e-05
Agromyces intestinalis	2592652	S	19	7e-05	28	7e-05
Agromyces aureus	453304	S	14	5e-05	50	0.00013
Agromyces marinus	1389020	S	14	5e-05	32	8e-05
Agromyces soli	659012	S	12	4e-05	60	0.00015
Rathayibacter sp. VKM Ac-2760	2609253	S	33	0.00012	43	0.00011
Rathayibacter sp. VKM Ac-2804	2609257	S	28	0.0001	0	0
Rathayibacter tanaceti	1671680	S	21	7e-05	19	5e-05
Rathayibacter festucae	110937	S	24	8e-05	53	0.00014
Agrococcus sp. Marseille-Q4369	2810513	S	15	5e-05	20	5e-05
Agrococcus sp. SGAir0287	2070347	S	12	4e-05	24	6e-05
Agrococcus sp. SL85	2995141	S	14	5e-05	11	3e-05
Agrococcus jejuensis	399736	S	17	6e-05	31	8e-05
Agrococcus carbonis	684552	S	25	9e-05	33	8e-05
Cryobacterium sp. SO2	1897060	S	21	7e-05	40	0.0001
Cryobacterium sp. 10S3	3048582	S	22	8e-05	43	0.00011
Cryobacterium sp. LW097	1978566	S	17	6e-05	27	7e-05
Leucobacter allii	2932247	S	19	7e-05	31	8e-05
Leucobacter tenebrionis	2873270	S	12	4e-05	22	6e-05
Clavibacter michiganensis	28447	S	37	0.00013	56	0.00014
Microcella daejeonensis	2994971	S	26	9e-05	24	6e-05
Protaetiibacter sp. SSC-01	2759943	S	27	9e-05	51	0.00013
Protaetiibacter intestinalis	2419774	S	17	6e-05	51	0.00013
Protaetiibacter larvae	2592654	S	16	6e-05	41	0.00011
Salinibacterium sp. ZJ450	2708338	S	17	6e-05	34	9e-05
Humibacter ginsenosidimutans	2599293	S	93	0.00033	212	0.00054
Diaminobutyricibacter sp. McL0608	3143537	S	39	0.00014	99	0.00025
Frigoribacterium sp. NBH87	2596916	S	16	6e-05	20	5e-05
Frigoribacterium sp. SL97	2994664	S	15	5e-05	37	9e-05
Herbiconiux sp. L3-i23	2905871	S	15	5e-05	28	7e-05
Herbiconiux sp. SALV-R1	2735133	S	11	4e-05	34	9e-05
Microterricola viridarii	412690	S	25	9e-05	78	0.0002
Gryllotalpicola protaetiae	2419771	S	20	7e-05	49	0.00013
Naasia aerilata	1162966	S	20	7e-05	44	0.00011
Subtercola sp. PAMC28395	2846775	S	12	4e-05	12	3e-05
Homoserinibacter sp. YIM 151385	2985506	S	14	5e-05	47	0.00012
Cnuibacter physcomitrellae	1619308	S	17	6e-05	30	8e-05
Glaciihabitans sp. INWT7	2596912	S	12	4e-05	41	0.00011
Diaminobutyricimonas sp. LJ205	2683590	S	12	4e-05	27	7e-05
Arthrobacter sp. NtRootA1	2830983	S	236	0.00083	164	0.00042
Arthrobacter sp. FW305-BF8	2879617	S	127	0.00044	149	0.00038
Arthrobacter sp. CDRTa11	2651199	S	51	0.00018	65	0.00017
Arthrobacter sp. StoSoilB20	2830995	S	52	0.00018	21	5e-05
Arthrobacter sp. 24S4-2	2575374	S	49	0.00017	89	0.00023
Arthrobacter sp. FB24	290399	S	50	0.00018	45	0.00012
Arthrobacter sp. QXT-31	1357915	S	30	0.00011	47	0.00012
Arthrobacter sp. Rue61a	1118963	S	27	9e-05	18	5e-05
Arthrobacter sp. NEB 688	904039	S	24	8e-05	68	0.00017
Arthrobacter sp. CJ23	2972479	S	23	8e-05	27	7e-05
Arthrobacter sp. NicSoilB4	2830997	S	19	7e-05	29	7e-05
Arthrobacter sp. PM3	2017685	S	12	4e-05	15	4e-05
Arthrobacter sp. StoSoilB13	2830993	S	48	0.00017	0	0
Arthrobacter sp. PAMC25564	2565366	S	15	5e-05	40	0.0001
Arthrobacter sp. StoSoilB22	2830996	S	14	5e-05	12	3e-05
Arthrobacter sp. NicSoilC5	2831000	S	21	7e-05	55	0.00014
Arthrobacter sp. KBS0702	2578107	S	18	6e-05	45	0.00012
Arthrobacter crystallopoietes	37928	S	25	9e-05	29	7e-05
Arthrobacter agilis	37921	S	15	5e-05	16	4e-05
Arthrobacter oryzae	409290	S	22	8e-05	40	0.0001
Arthrobacter dokdonellae	2211210	S	11	4e-05	26	7e-05
Arthrobacter antioxidans	2895818	S	13	5e-05	23	6e-05
Pseudarthrobacter sp. IC2-21	3092262	S	25	9e-05	14	4e-05
Pseudarthrobacter sp. BIM B-2242	2772401	S	21	7e-05	47	0.00012
Pseudarthrobacter sp. MM222	3018929	S	19	7e-05	35	9e-05
Pseudarthrobacter sp. NBSH8	2596911	S	21	7e-05	0	0
Pseudarthrobacter sp. NS4	2973976	S	16	6e-05	27	7e-05
Pseudarthrobacter sp. L1SW	2851598	S	17	6e-05	0	0
Pseudarthrobacter equi	728066	S	24	8e-05	23	6e-05
Pseudarthrobacter chlorophenolicus	85085	S	19	7e-05	19	5e-05
Kocuria rhizophila	72000	S	27	9e-05	0	0
Kocuria flava	446860	S	20	7e-05	39	0.0001
Kocuria rosea	1275	S	11	4e-05	32	8e-05
Kocuria turfanensis	388357	S	12	4e-05	34	9e-05
Glutamicibacter halophytocola	1933880	S	25	9e-05	23	6e-05
Glutamicibacter mishrai	1775880	S	17	6e-05	17	4e-05
Sinomonas atrocyanea	37927	S	18	6e-05	21	5e-05
Pedococcus dokdonensis	443156	S	126	0.00044	301	0.00077
Janibacter sp. CX7	2963431	S	16	6e-05	19	5e-05
Janibacter melonis	262209	S	37	0.00013	48	0.00012
Janibacter terrae	103817	S	56	0.0002	40	0.0001
Janibacter limosus	53458	S	19	7e-05	34	9e-05
Terrabacter sp. C0L_2	3108389	S	65	0.00023	176	0.00045
Nostocoides sp. HKS02	1813880	S	54	0.00019	124	0.00032
Phycicoccus sp. HDW14	2714941	S	41	0.00014	50	0.00013
Phycicoccus endophyticus	1690220	S	11	4e-05	20	5e-05
Intrasporangium calvum	53358	S	31	0.00011	44	0.00011
Arsenicicoccus sp. oral taxon 190	1658671	S	21	7e-05	34	9e-05
Cellulomonas sp. NTE-D12	2962632	S	37	0.00013	33	8e-05
Cellulomonas sp. Y8	2591145	S	29	0.0001	40	0.0001
Cellulomonas sp. ATA003	3073064	S	21	7e-05	35	9e-05
Cellulomonas sp. NS3	2973977	S	18	6e-05	36	9e-05
Cellulomonas sp. JZ18	2654191	S	18	6e-05	22	6e-05
Cellulomonas sp. H30R-01	2704467	S	19	7e-05	25	6e-05
Cellulomonas fimi	1708	S	47	0.00016	46	0.00012
Cellulomonas wangsupingiae	2968085	S	19	7e-05	15	4e-05
Cellulomonas palmilytica	2608402	S	23	8e-05	15	4e-05
Cellulomonas taurus	2729175	S	16	6e-05	20	5e-05
Cellulomonas fengjieae	2819978	S	14	5e-05	21	5e-05
Cellulomonas chengniuliangii	2968084	S	13	5e-05	16	4e-05
Paraoerskovia sediminicola	1138587	S	15	5e-05	20	5e-05
Actinotalea sp. JY-7876	2758442	S	13	5e-05	17	4e-05
Cellulosimicrobium cellulans	1710	S	85	0.0003	97	0.00025
Isoptericola variabilis	139208	S	20	7e-05	35	9e-05
Isoptericola dokdonensis	372663	S	19	7e-05	15	4e-05
Xylanimonas allomyrinae	2509459	S	14	5e-05	24	6e-05
Ornithinimicrobium sufpigmenti	2508882	S	20	7e-05	19	5e-05
Ornithinimicrobium avium	2283195	S	14	5e-05	24	6e-05
Ornithinimicrobium flavum	1288636	S	17	6e-05	25	6e-05
Ornithinimicrobium cryptoxanthini	2934161	S	11	4e-05	14	4e-05
Serinicoccus chungangensis	767452	S	17	6e-05	28	7e-05
Brachybacterium sp. P6-10-X1	1903186	S	22	8e-05	12	3e-05
Brachybacterium ginsengisoli	1331682	S	18	6e-05	14	4e-05
Brachybacterium huguangmaarense	1652028	S	36	0.00013	0	0
Brevibacterium sp. BRM-1	2999062	S	43	0.00015	37	9e-05
Brevibacterium casei	33889	S	55	0.00019	44	0.00011
Dermacoccus nishinomiyaensis	1274	S	40	0.00014	25	6e-05
Luteipulveratus mongoliensis	571913	S	13	5e-05	16	4e-05
Yimella sp. cx-51	2770551	S	11	4e-05	20	5e-05
Barrientosiimonas endolithica	1535208	S	43	0.00015	80	0.00021
Allobranchiibius sp. GilTou73	2904523	S	10	4e-05	29	7e-05
Georgenia sp. M64	3120520	S	30	0.00011	45	0.00012
Georgenia yuyongxinii	2589797	S	20	7e-05	17	4e-05
Georgenia wutianyii	2585135	S	17	6e-05	19	5e-05
Georgenia faecalis	2483799	S	13	5e-05	21	5e-05
Ruania suaedae	2897774	S	16	6e-05	13	3e-05
Occultella kanbiaonis	2675754	S	28	0.0001	36	9e-05
Sanguibacter sp. HDW7	2714931	S	15	5e-05	19	5e-05
Sanguibacter keddieii	60920	S	15	5e-05	23	6e-05
Pengzhenrongella sicca	2819238	S	17	6e-05	30	8e-05
Luteimicrobium xylanilyticum	1133546	S	16	6e-05	32	8e-05
Beutenbergia cavernae	84757	S	20	7e-05	25	6e-05
Mycolicibacterium sp. YH-1	2908837	S	41	0.00014	57	0.00015
Mycolicibacterium sp. TUM20985	3023370	S	27	9e-05	35	9e-05
Mycolicibacterium sp. ND9-15	3042320	S	25	9e-05	29	7e-05
Mycolicibacterium sp. HK-90	3056937	S	15	5e-05	34	9e-05
Mycolicibacterium sp. MU0053	3064286	S	20	7e-05	39	0.0001
Mycolicibacterium sp. MU0050	3064284	S	15	5e-05	39	0.0001
Mycolicibacterium neoaurum	1795	S	81	0.00028	97	0.00025
Mycolicibacterium frederiksbergense	117567	S	121	0.00042	284	0.00073
Mycolicibacterium moriokaense	39691	S	38	0.00013	50	0.00013
Mycolicibacterium mageritense	53462	S	37	0.00013	46	0.00012
Mycolicibacterium diernhoferi	1801	S	35	0.00012	33	8e-05
Mycolicibacterium rhodesiae	36814	S	46	0.00016	53	0.00014
Mycolicibacterium sediminis	1286180	S	29	0.0001	46	0.00012
Mycolicibacterium phocaicum	319706	S	55	0.00019	107	0.00027
Mycolicibacterium aubagnense	319707	S	38	0.00013	81	0.00021
Mycolicibacterium rutilum	370526	S	32	0.00011	59	0.00015
Mycolicibacterium grossiae	1552759	S	66	0.00023	42	0.00011
Mycolicibacterium litorale	758802	S	29	0.0001	68	0.00017
Mycolicibacterium goodii	134601	S	27	9e-05	71	0.00018
Mycolicibacterium holsaticum	152142	S	23	8e-05	33	8e-05
Mycolicibacterium arabiense	1286181	S	22	8e-05	49	0.00013
Mycolicibacterium smegmatis	1772	S	25	9e-05	55	0.00014
Mycolicibacterium celeriflavum	1249101	S	24	8e-05	54	0.00014
Mycolicibacterium fortuitum	1766	S	25	9e-05	32	8e-05
Mycolicibacterium duvalii	39688	S	25	9e-05	40	0.0001
Mycolicibacterium madagascariense	212765	S	21	7e-05	30	8e-05
Mycolicibacterium pulveris	36813	S	18	6e-05	35	9e-05
Mycolicibacterium psychrotolerans	216929	S	18	6e-05	29	7e-05
Mycolicibacterium poriferae	39694	S	20	7e-05	26	7e-05
Mycolicibacterium tokaiense	39695	S	18	6e-05	23	6e-05
Mycolicibacterium fluoranthenivorans	258505	S	18	6e-05	36	9e-05
Mycolicibacterium phlei	1771	S	19	7e-05	28	7e-05
Mycolicibacterium baixiangningiae	2761578	S	17	6e-05	26	7e-05
Mycolicibacterium aurum	1791	S	17	6e-05	31	8e-05
Mycolicibacterium gadium	1794	S	19	7e-05	35	9e-05
Mycolicibacterium thermoresistibile	1797	S	20	7e-05	26	7e-05
Mycolicibacterium parafortuitum	39692	S	17	6e-05	26	7e-05
Mycolicibacterium chubuense	1800	S	107	0.00037	56	0.00014
Mycolicibacterium rufum	318424	S	20	7e-05	48	0.00012
Mycolicibacterium hassiacum	46351	S	17	6e-05	35	9e-05
Mycolicibacterium monacense	85693	S	19	7e-05	34	9e-05
Mycolicibacterium boenickei	146017	S	15	5e-05	14	4e-05
Mycolicibacterium confluentis	28047	S	13	5e-05	21	5e-05
Mycolicibacterium doricum	126673	S	14	5e-05	15	4e-05
Mycolicibacterium gilvum	1804	S	20	7e-05	40	0.0001
Mycolicibacterium mucogenicum	56689	S	12	4e-05	36	9e-05
Mycolicibacterium chitae	1792	S	12	4e-05	16	4e-05
Mycolicibacterium nivoides	2487344	S	13	5e-05	21	5e-05
Mycolicibacterium anyangense	1431246	S	11	4e-05	23	6e-05
Mycolicibacterium insubricum	444597	S	13	5e-05	15	4e-05
Mycolicibacterium austroafricanum	39687	S	118	0.00041	187	0.00048
Mycolicibacterium fallax	1793	S	13	5e-05	23	6e-05
Mycobacterium sp. JS623	212767	S	104	0.00036	132	0.00034
Mycobacterium sp. ITM-2016-00316	2099695	S	63	0.00022	304	0.00078
Mycobacterium sp. ITM-2016-00318	2099693	S	29	0.0001	55	0.00014
Mycobacterium sp. IDR2000157661	2867005	S	22	8e-05	30	8e-05
Mycobacterium sp. Aquia_213	2991728	S	12	4e-05	0	0
Mycobacterium sp. Z3061	3073562	S	11	4e-05	20	5e-05
Mycobacterium sp. EPa45	1545728	S	11	4e-05	0	0
Mycobacterium sp. MS1601	1936029	S	10	4e-05	28	7e-05
Mycobacterium sp. ITM-2016-00317	2099694	S	10	4e-05	19	5e-05
Mycobacterium sp. SMC-4	2857059	S	28	0.0001	47	0.00012
Mycobacterium parmense	185642	S	18	6e-05	18	5e-05
Mycobacterium kubicae	120959	S	20	7e-05	28	7e-05
Mycobacterium heidelbergense	53376	S	12	4e-05	18	5e-05
Mycobacterium simiae	1784	S	10	4e-05	0	0
Mycobacterium lentiflavum	141349	S	15	5e-05	15	4e-05
Mycobacterium avium	1764	S	21	7e-05	41	0.00011
Mycobacterium senriense	2775496	S	12	4e-05	11	3e-05
Mycobacterium intracellulare	1767	S	67	0.00023	120	0.00031
Mycobacterium mantenii	560555	S	10	4e-05	0	0
Mycobacterium adipatum	1682113	S	53	0.00019	60	0.00015
Mycobacterium branderi	43348	S	17	6e-05	25	6e-05
Mycobacterium xenopi	1789	S	17	6e-05	12	3e-05
Candidatus Mycobacterium methanotrophicum	2943498	S	14	5e-05	12	3e-05
Mycobacterium lacus	169765	S	13	5e-05	18	5e-05
Mycobacterium decipiens	1430326	S	11	4e-05	0	0
Mycobacterium dioxanotrophicus	482462	S	17	6e-05	42	0.00011
Mycobacterium kansasii	1768	S	12	4e-05	18	5e-05
Candidatus Mycobacterium wuenschmannii	3027808	S	10	4e-05	24	6e-05
Mycobacterium gallinarum	39689	S	12	4e-05	24	6e-05
Mycolicibacter terrae	1788	S	14	5e-05	0	0
Rhodococcus sp. X156	2499145	S	17	6e-05	31	8e-05
Rhodococcus sp. W8901	2742603	S	15	5e-05	15	4e-05
Rhodococcus sp. P-2	2795031	S	32	0.00011	29	7e-05
Rhodococcus sp. SGAir0479	2567884	S	14	5e-05	35	9e-05
Rhodococcus erythropolis	1833	S	162	0.00057	216	0.00055
Rhodococcus qingshengii	334542	S	80	0.00028	122	0.00031
Rhodococcus jostii	132919	S	136	0.00048	0	0
Rhodococcus opacus	37919	S	36	0.00013	73	0.00019
Rhodococcus fascians	1828	S	36	0.00013	54	0.00014
Rhodococcus antarcticus	2987751	S	16	6e-05	19	5e-05
Rhodococcus koreensis	99653	S	10	4e-05	17	4e-05
Rhodococcus triatomae	300028	S	16	6e-05	28	7e-05
Nocardia sp. NBC_01730	2975998	S	171	0.0006	17	4e-05
Nocardia sp. NBC_00565	2975993	S	12	4e-05	17	4e-05
Nocardia sp. CS682	1047172	S	12	4e-05	27	7e-05
Nocardia sp. NBC_00508	2975992	S	11	4e-05	19	5e-05
Nocardia asteroides	1824	S	42	0.00015	94	0.00024
Nocardia puris	208602	S	29	0.0001	13	3e-05
Nocardia vinacea	96468	S	20	7e-05	19	5e-05
Nocardia wallacei	480035	S	26	9e-05	31	8e-05
Nocardia terpenica	455432	S	16	6e-05	36	9e-05
Nocardia arthritidis	228602	S	15	5e-05	17	4e-05
Nocardia brasiliensis	37326	S	21	7e-05	55	0.00014
Nocardia cyriacigeorgica	135487	S	29	0.0001	75	0.00019
Nocardia salmonicida	53431	S	18	6e-05	26	7e-05
Nocardia otitidiscaviarum	1823	S	14	5e-05	16	4e-05
Nocardia farcinica	37329	S	27	9e-05	58	0.00015
Nocardia yunnanensis	2382165	S	11	4e-05	21	5e-05
Nocardia sputorum	2984338	S	12	4e-05	18	5e-05
Nocardia iowensis	204891	S	11	4e-05	28	7e-05
Nocardia gipuzkoensis	2749991	S	17	6e-05	24	6e-05
Nocardia huaxiensis	2755382	S	10	4e-05	17	4e-05
Prescottella equi	43767	S	19	7e-05	31	8e-05
Corynebacterium cyclohexanicum	322009	S	17	6e-05	16	4e-05
Gordonia terrae	2055	S	99	0.00035	17	4e-05
Gordonia amarae	36821	S	14	5e-05	15	4e-05
Gordonia rubripertincta	36822	S	34	0.00012	61	0.00016
Gordonia mangrovi	2665643	S	10	4e-05	19	5e-05
Tsukamurella paurometabola	2061	S	15	5e-05	27	7e-05
Tsukamurella tyrosinosolvens	57704	S	16	6e-05	35	9e-05
Nocardioides sp. W7	2931390	S	91	0.00032	287	0.00074
Nocardioides sp. JS614	196162	S	158	0.00055	852	0.00219
Nocardioides sp. LMS-CY	2840457	S	83	0.00029	644	0.00165
Nocardioides sp. S-34	3095075	S	85	0.0003	381	0.00098
Nocardioides sp. BP30	3036374	S	68	0.00024	341	0.00087
Nocardioides sp. S5	2017486	S	260	0.00091	680	0.00174
Nocardioides sp. zg-1228	2763008	S	64	0.00022	336	0.00086
Nocardioides sp. HM61	3095076	S	58	0.0002	212	0.00054
Nocardioides sp. HDW12B	2714939	S	61	0.00021	215	0.00055
Nocardioides sp. cx-173	2898796	S	55	0.00019	214	0.00055
Nocardioides sp. B-3	2895565	S	45	0.00016	228	0.00058
Nocardioides sp. NBC_00368	2976000	S	46	0.00016	226	0.00058
Nocardioides sp. CF8	110319	S	74	0.00026	370	0.00095
Nocardioides sp. InS609-2	2760705	S	42	0.00015	232	0.0006
Nocardioides sp. TF02-7	2917724	S	49	0.00017	232	0.0006
Nocardioides sp. Arc9.136	2996826	S	45	0.00016	207	0.00053
Nocardioides sp. S-1144	2582905	S	35	0.00012	231	0.00059
Nocardioides sp. WS12	2486272	S	32	0.00011	239	0.00061
Nocardioides sp. QY071	3044187	S	62	0.00022	2495	0.0064
Nocardioides sp. JQ2195	2592334	S	31	0.00011	276	0.00071
Nocardioides sp. dk884	2662361	S	34	0.00012	218	0.00056
Nocardioides sp. Kera G14	2884264	S	14	5e-05	194	0.0005
Nocardioides cynanchi	2558918	S	122	0.00043	371	0.00095
Nocardioides anomalus	2712223	S	88	0.00031	301	0.00077
Nocardioides panacis	2849501	S	64	0.00022	253	0.00065
Nocardioides marmorisolisilvae	1542737	S	92	0.00032	1382	0.00355
Nocardioides ungokensis	1643322	S	61	0.00021	270	0.00069
Nocardioides okcheonensis	2894081	S	64	0.00022	335	0.00086
Nocardioides piscis	2714938	S	87	0.0003	286	0.00073
Nocardioides scoriae	642780	S	47	0.00016	429	0.0011
Nocardioides humi	449461	S	46	0.00016	325	0.00083
Nocardioides euryhalodurans	2518370	S	40	0.00014	181	0.00046
Nocardioides dongkuii	2760089	S	43	0.00015	159	0.00041
Nocardioides aquaticus	160826	S	39	0.00014	164	0.00042
Nocardioides coralli	2872154	S	33	0.00012	117	0.0003
Nocardioides mesophilus	433659	S	35	0.00012	232	0.0006
Nocardioides marmotae	2663857	S	37	0.00013	157	0.0004
Nocardioides aromaticivorans	200618	S	32	0.00011	253	0.00065
Nocardioides seonyuensis	2518371	S	30	0.00011	134	0.00034
Nocardioides dokdonensis	450734	S	39	0.00014	178	0.00046
Nocardioides campestrisoli	2736757	S	28	0.0001	156	0.0004
Nocardioides rotundus	1774216	S	37	0.00013	172	0.00044
Nocardioides panacisoli	627624	S	23	8e-05	130	0.00033
Nocardioides pantholopis	2483798	S	29	0.0001	164	0.00042
Nocardioides marinisabuli	419476	S	30	0.00011	171	0.00044
Nocardioides sambongensis	2589074	S	22	8e-05	156	0.0004
Nocardioides jishulii	2575440	S	25	9e-05	78	0.0002
Nocardioides houyundeii	2045452	S	22	8e-05	118	0.0003
Nocardioides daphniae	402297	S	27	9e-05	106	0.00027
Nocardioides faecalis	2803858	S	23	8e-05	199	0.00051
Nocardioides baekrokdamisoli	1804624	S	16	6e-05	111	0.00028
Nocardioides ochotonae	2685869	S	25	9e-05	113	0.00029
Aeromicrobium sp. A1-2	2107713	S	39	0.00014	91	0.00023
Aeromicrobium sp. Leaf245	1736306	S	29	0.0001	46	0.00012
Aeromicrobium sp. HA	3009077	S	22	8e-05	48	0.00012
Aeromicrobium choanae	1736691	S	39	0.00014	54	0.00014
Aeromicrobium chenweiae	2079793	S	25	9e-05	73	0.00019
Aeromicrobium erythreum	2041	S	20	7e-05	65	0.00017
Aeromicrobium yanjiei	2662028	S	21	7e-05	42	0.00011
Aeromicrobium wangtongii	2969247	S	18	6e-05	48	0.00012
Aeromicrobium marinum	219314	S	11	4e-05	58	0.00015
Pimelobacter simplex	2045	S	60	0.00021	445	0.00114
Friedmanniella luteola	546871	S	34	0.00012	56	0.00014
Mumia sp. ZJ1417	2708082	S	23	8e-05	35	9e-05
Solicola gregarius	2908642	S	21	7e-05	43	0.00011
Kribbella sp. NBC_00482	2975968	S	241	0.00084	323	0.00083
Kribbella sp. NBC_00709	2975972	S	104	0.00036	157	0.0004
Kribbella sp. NBC_00359	2975966	S	102	0.00036	140	0.00036
Kribbella sp. NBC_00382	2975967	S	66	0.00023	78	0.0002
Kribbella sp. NBC_01245	2903578	S	58	0.0002	92	0.00024
Kribbella sp. CA-293567	3002436	S	57	0.0002	62	0.00016
Kribbella sp. NBC_01484	2903579	S	75	0.00026	133	0.00034
Kribbella flavida	182640	S	63	0.00022	69	0.00018
Kribbella qitaiheensis	1544730	S	42	0.00015	75	0.00019
Microlunatus phosphovorus	29405	S	49	0.00017	44	0.00011
Microlunatus sagamiharensis	546874	S	30	0.00011	44	0.00011
Microlunatus soli	630515	S	25	9e-05	46	0.00012
Microlunatus sp. Gsoil 973	2672569	S	15	5e-05	26	7e-05
Microlunatus elymi	2596828	S	13	5e-05	36	9e-05
Tessaracoccus defluvii	1285901	S	27	9e-05	32	8e-05
Tessaracoccus flavus	1610493	S	22	8e-05	0	0
Propioniciclava coleopterorum	2714937	S	92	0.00032	30	8e-05
Auraticoccus monumenti	675864	S	28	0.0001	37	9e-05
Raineyella sp. LH-20	3081204	S	35	0.00012	28	7e-05
Actinopolymorpha singaporensis	117157	S	30	0.00011	50	0.00013
Amycolatopsis sp. DSM 110486	2865832	S	85	0.0003	36	9e-05
Amycolatopsis sp. 2-15	715471	S	85	0.0003	29	7e-05
Amycolatopsis sp. FDAARGOS 1241	2778070	S	46	0.00016	49	0.00013
Amycolatopsis sp. NBC_01488	2903563	S	47	0.00016	78	0.0002
Amycolatopsis sp. YIM 10	2653857	S	37	0.00013	50	0.00013
Amycolatopsis sp. 2-2	715472	S	58	0.0002	72	0.00018
Amycolatopsis sp. NBC_00345	2975955	S	36	0.00013	34	9e-05
Amycolatopsis sp. CA-230715	2745196	S	31	0.00011	43	0.00011
Amycolatopsis sp. FBCC-B4732	3079339	S	33	0.00012	69	0.00018
Amycolatopsis sp. AA4	1896961	S	27	9e-05	31	8e-05
Amycolatopsis sp. NBC_01480	2903562	S	24	8e-05	41	0.00011
Amycolatopsis sp. DG1A-15b	3052846	S	30	0.00011	57	0.00015
Amycolatopsis sp. BJA-103	1911175	S	22	8e-05	28	7e-05
Amycolatopsis sp. Hca4	2742131	S	21	7e-05	65	0.00017
Amycolatopsis sp. FU40	2914159	S	16	6e-05	26	7e-05
Amycolatopsis sp. WQ 127309	2932773	S	60	0.00021	62	0.00016
Amycolatopsis sp. EV170708-02-1	2919322	S	25	9e-05	48	0.00012
Amycolatopsis acidiphila	715473	S	41	0.00014	46	0.00012
Amycolatopsis thermalba	944492	S	31	0.00011	41	0.00011
Amycolatopsis rhabdoformis	1448059	S	29	0.0001	48	0.00012
Amycolatopsis keratiniphila	129921	S	30	0.00011	52	0.00013
Amycolatopsis cynarae	2995223	S	24	8e-05	39	0.0001
Amycolatopsis albispora	1804986	S	89	0.00031	82	0.00021
Amycolatopsis mongoliensis	715475	S	27	9e-05	69	0.00018
Amycolatopsis methanolica	1814	S	22	8e-05	39	0.0001
Amycolatopsis mediterranei	33910	S	24	8e-05	35	9e-05
Amycolatopsis orientalis	31958	S	20	7e-05	24	6e-05
Amycolatopsis aidingensis	2842453	S	14	5e-05	31	8e-05
Pseudonocardia sp. DSM 110487	2865833	S	659	0.00231	717	0.00184
Pseudonocardia sp. AL041005-10	445576	S	37	0.00013	19	5e-05
Pseudonocardia sp. HH130630-07	1690815	S	45	0.00016	74	0.00019
Pseudonocardia sp. HH130629-09	1641402	S	32	0.00011	56	0.00014
Pseudonocardia broussonetiae	2736640	S	68	0.00024	97	0.00025
Pseudonocardia dioxanivorans	240495	S	116	0.00041	101	0.00026
Pseudonocardia petroleophila	37331	S	56	0.0002	52	0.00013
Pseudonocardia autotrophica	2074	S	53	0.00019	71	0.00018
Pseudonocardia abyssalis	2792008	S	37	0.00013	62	0.00016
Saccharopolyspora erythraea	1836	S	39	0.00014	57	0.00015
Saccharopolyspora sp. SCSIO 74807	3118084	S	22	8e-05	17	4e-05
Saccharopolyspora gregorii	33914	S	19	7e-05	34	9e-05
Saccharopolyspora rosea	524884	S	16	6e-05	33	8e-05
Saccharopolyspora gloriosae	455344	S	18	6e-05	19	5e-05
Saccharopolyspora pogona	333966	S	24	8e-05	29	7e-05
Kutzneria albida	43357	S	27	9e-05	31	8e-05
Kutzneria chonburiensis	1483604	S	28	0.0001	51	0.00013
Kutzneria sp. CA-103260	2802641	S	26	9e-05	57	0.00015
Kutzneria buriramensis	1045776	S	108	0.00038	21	5e-05
Lentzea sp. NBC_00516	2903582	S	36	0.00013	43	0.00011
Lentzea sp. HUAS12	2951806	S	24	8e-05	42	0.00011
Lentzea sp. DG1S-22	3108822	S	23	8e-05	39	0.0001
Lentzea guizhouensis	1586287	S	25	9e-05	41	0.00011
Saccharothrix syringae	103733	S	35	0.00012	40	0.0001
Saccharothrix espanaensis	103731	S	25	9e-05	35	9e-05
Saccharothrix sp. 6-C	2781735	S	20	7e-05	45	0.00012
Saccharomonospora marina	632569	S	18	6e-05	38	0.0001
Saccharomonospora cyanea	40989	S	22	8e-05	18	5e-05
Saccharomonospora glauca	40990	S	24	8e-05	23	6e-05
Actinoalloteichus hymeniacidonis	340345	S	21	7e-05	25	6e-05
Actinoalloteichus sp. AHMU CJ021	2072503	S	14	5e-05	24	6e-05
Kibdelosporangium phytohabitans	860235	S	43	0.00015	38	0.0001
Actinomycetospora sp. NBC_00405	2975952	S	35	0.00012	57	0.00015
Actinokineospora sp. UTMC 2448	2268449	S	36	0.00013	42	0.00011
Crossiella sp. CA-258035	2981138	S	31	0.00011	44	0.00011
Umezawaea sp. Da 62-37	3075927	S	31	0.00011	51	0.00013
Alloactinosynnema sp. L-07	1653480	S	23	8e-05	35	9e-05
Allokutzneria albata	211114	S	18	6e-05	43	0.00011
Prauserella marina	530584	S	10	4e-05	14	4e-05
Allosaccharopolyspora coralli	2665642	S	15	5e-05	16	4e-05
Micromonospora sp. NBC_01813	2975988	S	31	0.00011	43	0.00011
Micromonospora sp. NBC_01796	2975987	S	30	0.00011	48	0.00012
Verrucosispora sp. NA02020	2742132	S	30	0.00011	37	9e-05
Micromonospora sp. WMMD812	3015152	S	27	9e-05	42	0.00011
Micromonospora sp. NBRC 110009	3061627	S	32	0.00011	42	0.00011
Micromonospora sp. NBC_00389	2903586	S	25	9e-05	24	6e-05
Micromonospora sp. DSM 45708	3111767	S	30	0.00011	24	6e-05
Micromonospora sp. FIMYZ51	3051832	S	22	8e-05	42	0.00011
Verrucosispora sp. WMMD573	3015149	S	29	0.0001	15	4e-05
Micromonospora sp. NBC_01699	2975984	S	21	7e-05	31	8e-05
Micromonospora sp. DPT	3142975	S	31	0.00011	43	0.00011
Micromonospora sp. WMMC415	2675222	S	19	7e-05	36	9e-05
Micromonospora sp. B006	2201999	S	42	0.00015	24	6e-05
Micromonospora sp. WMMD882	3015151	S	16	6e-05	39	0.0001
Micromonospora sp. NBC_00330	2903585	S	33	0.00012	0	0
Micromonospora sp. NBC_01739	2975985	S	14	5e-05	20	5e-05
Micromonospora sp. WMMD998	3016092	S	28	0.0001	19	5e-05
Micromonospora echinaurantiaca	47857	S	31	0.00011	24	6e-05
Micromonospora inositola	47865	S	32	0.00011	30	8e-05
Micromonospora zamorensis	709883	S	26	9e-05	44	0.00011
Micromonospora cathayae	3028804	S	22	8e-05	39	0.0001
Micromonospora viridifaciens	1881	S	22	8e-05	47	0.00012
Micromonospora echinospora	1877	S	20	7e-05	23	6e-05
Micromonospora terminaliae	1914461	S	23	8e-05	25	6e-05
Micromonospora krabiensis	307121	S	19	7e-05	24	6e-05
Micromonospora maris	1003110	S	19	7e-05	40	0.0001
Micromonospora globbae	1894969	S	18	6e-05	44	0.00011
Micromonospora craniellae	2294034	S	17	6e-05	20	5e-05
Micromonospora auratinigra	261654	S	17	6e-05	33	8e-05
Micromonospora coriariae	285665	S	16	6e-05	15	4e-05
Micromonospora coxensis	356852	S	16	6e-05	31	8e-05
Micromonospora endophytica	515350	S	14	5e-05	17	4e-05
Micromonospora aurantiaca	47850	S	139	0.00049	0	0
Micromonospora siamensis	299152	S	14	5e-05	27	7e-05
Micromonospora ureilytica	709868	S	14	5e-05	33	8e-05
Micromonospora narathiwatensis	299146	S	12	4e-05	31	8e-05
Micromonospora profundi	1420889	S	12	4e-05	21	5e-05
Micromonospora tulbaghiae	479978	S	24	8e-05	0	0
Micromonospora halotolerans	709879	S	13	5e-05	43	0.00011
Actinoplanes sp. L3-i22	2836373	S	57	0.0002	152	0.00039
Actinoplanes sp. NBC_00393	2975953	S	54	0.00019	78	0.0002
Actinoplanes sp. N902-109	649831	S	50	0.00018	76	0.00019
Actinoplanes sp. OR16	946334	S	38	0.00013	54	0.00014
Actinoplanes friuliensis	196914	S	72	0.00025	70	0.00018
Actinoplanes sichuanensis	512349	S	46	0.00016	52	0.00013
Actinoplanes teichomyceticus	1867	S	41	0.00014	47	0.00012
Actinoplanes derwentensis	113562	S	25	9e-05	31	8e-05
Actinoplanes missouriensis	1866	S	27	9e-05	36	9e-05
Actinoplanes ianthinogenes	122358	S	26	9e-05	59	0.00015
Actinoplanes oblitus	3040509	S	20	7e-05	63	0.00016
Dactylosporangium sp. AC04546	2862460	S	61	0.00021	79	0.0002
Dactylosporangium sp. NBC_01737	2975959	S	52	0.00018	63	0.00016
Dactylosporangium aurantiacum	35754	S	34	0.00012	77	0.0002
Dactylosporangium fulvum	53359	S	28	0.0001	41	0.00011
Dactylosporangium vinaceum	53362	S	63	0.00022	53	0.00014
Dactylosporangium roseum	47989	S	21	7e-05	29	7e-05
Phytohabitans suffuscus	624315	S	70	0.00025	85	0.00022
Phytohabitans flavus	1076124	S	40	0.00014	55	0.00014
Plantactinospora sp. ZYX-F-223	3144103	S	45	0.00016	64	0.00016
Plantactinospora sp. KBS50	2024580	S	19	7e-05	26	7e-05
Actinocatenispora thailandica	227318	S	24	8e-05	42	0.00011
Actinocatenispora sera	390989	S	16	6e-05	60	0.00015
Catellatospora sp. IY07-71	2728827	S	42	0.00015	55	0.00014
Couchioplanes caeruleus	56438	S	31	0.00011	67	0.00017
Polymorphospora rubra	338584	S	26	9e-05	38	0.0001
Natronosporangium hydrolyticum	2811111	S	11	4e-05	20	5e-05
Salinispora tropica	168695	S	11	4e-05	0	0
Nonomuraea sp. NBC_00507	2976002	S	51	0.00018	72	0.00018
Nonomuraea sp. NBC_01738	2976003	S	22	8e-05	46	0.00012
Nonomuraea gerenzanensis	93944	S	47	0.00016	54	0.00014
[Actinomadura] parvosata	1955412	S	41	0.00014	60	0.00015
Nonomuraea coxensis	404386	S	34	0.00012	44	0.00011
Nonomuraea glycinis	2047744	S	30	0.00011	55	0.00014
Nonomuraea phyllanthi	2219224	S	28	0.0001	48	0.00012
Nonomuraea fuscirosea	1291556	S	23	8e-05	59	0.00015
Streptosporangium sp. 'caverna'	2202249	S	60	0.00021	93	0.00024
Streptosporangium sp. NBC_01756	2975950	S	58	0.0002	56	0.00014
Streptosporangium roseum	2001	S	28	0.0001	40	0.0001
Microbispora sp. ZYX-F-249	3144104	S	21	7e-05	31	8e-05
Microbispora sp. NBC_01189	2903583	S	20	7e-05	42	0.00011
Microbispora hainanensis	568844	S	33	0.00012	34	9e-05
Thermobispora bispora	2006	S	17	6e-05	17	4e-05
Actinomadura sp. NAK00032	2742128	S	51	0.00018	50	0.00013
Actinomadura sp. WMMA1423	2591108	S	39	0.00014	66	0.00017
Actinomadura sp. WMMB 499	1219491	S	24	8e-05	46	0.00012
Actinomadura madurae	1993	S	67	0.00023	65	0.00017
Actinomadura verrucosospora	46165	S	50	0.00018	58	0.00015
Actinomadura graeca	2750812	S	30	0.00011	36	9e-05
Actinomadura citrea	46158	S	38	0.00013	47	0.00012
Actinomadura luteofluorescens	46163	S	17	6e-05	26	7e-05
Spirillospora sp. NBC_01491	2976007	S	40	0.00014	41	0.00011
Spirillospora sp. NBC_00431	2976006	S	27	9e-05	33	8e-05
Thermomonospora amylolytica	1411117	S	36	0.00013	50	0.00013
Thermomonospora curvata	2020	S	16	6e-05	23	6e-05
Actinoallomurus sp. NBC_01490	2903557	S	48	0.00017	90	0.00023
Nocardiopsis gilva	280236	S	14	5e-05	13	3e-05
Nocardiopsis exhalans	163604	S	47	0.00016	0	0
Streptomonospora nanhaiensis	1323731	S	23	8e-05	21	5e-05
Blastococcus brunescens	1564165	S	89	0.00031	89	0.00023
Blastococcus sp. PRF04-17	2933797	S	106	0.00037	102	0.00026
Blastococcus saxobsidens	138336	S	41	0.00014	70	0.00018
Geodermatophilus obscurus	1861	S	128	0.00045	147	0.00038
Geodermatophilus sp. DSM 44513	1528104	S	52	0.00018	53	0.00014
Modestobacter marinus	477641	S	104	0.00036	111	0.00028
Modestobacter sp. L9-4	2851567	S	36	0.00013	51	0.00013
Jatrophihabitans cynanchi	2944128	S	151	0.00053	377	0.00097
Jatrophihabitans telluris	2038343	S	14	5e-05	14	4e-05
Frankia sp. QA3	710111	S	22	8e-05	22	6e-05
Frankia sp. ArI3	1858	S	21	7e-05	16	4e-05
Frankia casuarinae	106370	S	16	6e-05	16	4e-05
Pseudofrankia inefficax	298654	S	30	0.00011	62	0.00016
Candidatus Protofrankia datiscae	2716812	S	12	4e-05	19	5e-05
Jiangella alkaliphila	419479	S	53	0.00019	70	0.00018
Jiangella sp. DSM 45060	1798224	S	43	0.00015	55	0.00014
Nakamurella multipartita	53461	S	16	6e-05	23	6e-05
Nakamurella sp. PAMC28650	2762325	S	11	4e-05	11	3e-05
Nakamurella panacisegetis	1090615	S	10	4e-05	23	6e-05
Kineococcus sp. NBC_00420	2903564	S	19	7e-05	15	4e-05
Kineococcus radiotolerans	131568	S	16	6e-05	18	5e-05
Catenulispora acidiphila	304895	S	29	0.0001	39	0.0001
Stackebrandtia nassauensis	283811	S	15	5e-05	23	6e-05
Epidermidibacterium keratini	1891644	S	112	0.00039	28	7e-05
Actinopolyspora erythraea	414996	S	11	4e-05	0	0
Conexibacter sp. SYSU D00693	2812560	S	393	0.00138	468	0.0012
Conexibacter sp. S30A1	2937800	S	86	0.0003	99	0.00025
Conexibacter sp. DBS9H8	2937801	S	76	0.00027	83	0.00021
Conexibacter woesei	191495	S	425	0.00149	466	0.0012
Baekduia alba	2997333	S	401	0.0014	454	0.00116
Baekduia soli	496014	S	446	0.00156	510	0.00131
Capillimicrobium parvum	2884022	S	456	0.0016	541	0.00139
Paraconexibacter antarcticus	2949664	S	245	0.00086	345	0.00089
Miltoncostaea oceani	2843216	S	60	0.00021	52	0.00013
Miltoncostaea marina	2843215	S	140	0.00049	185	0.00047
Thermoleophilum album	29539	S	92	0.00032	95	0.00024
Rubrobacter tropicus	2653851	S	166	0.00058	201	0.00052
Rubrobacter xylanophilus	49319	S	151	0.00053	173	0.00044
Rubrobacter marinus	2653852	S	102	0.00036	130	0.00033
Rubrobacter radiotolerans	42256	S	46	0.00016	58	0.00015
Rubrobacter indicoceani	2051957	S	16	6e-05	11	3e-05
Iamia sp. SCSIO 61187	2722752	S	55	0.00019	50	0.00013
Iamia majanohamensis	467976	S	43	0.00015	59	0.00015
Dermatobacter hominis	2884263	S	65	0.00023	72	0.00018
Aquihabitans sp. G128	2849779	S	45	0.00016	79	0.0002
Actinomarinicola tropica	2789776	S	35	0.00012	72	0.00018
Ilumatobacter coccineus	467094	S	17	6e-05	17	4e-05
Egibacter rhizosphaerae	1670831	S	17	6e-05	17	4e-05
Euzebya pacifica	1608957	S	14	5e-05	0	0
Egicoccus halophilus	1670830	S	13	5e-05	16	4e-05
Paenibacillus mucilaginosus	61624	S	24	8e-05	28	7e-05
Paenibacillus andongensis	2975482	S	33	0.00012	46	0.00012
Peribacillus frigoritolerans	450367	S	51	0.00018	53	0.00014
Priestia megaterium	1404	S	71	0.00025	97	0.00025
Neobacillus sp. PS3-12	3070677	S	22	8e-05	0	0
Enterococcus faecalis	1351	S	154	0.00054	259	0.00066
Caldinitratiruptor microaerophilus	671077	S	12	4e-05	0	0
Dolichospermum heterosporum	747522	S	25	9e-05	0	0
Sphaerobacter thermophilus	2057	S	26	9e-05	17	4e-05
Capsulimonas corticalis	2219043	S	15	5e-05	13	3e-05
Fimbriimonas ginsengisoli	1005039	S	10	4e-05	12	3e-05
Vulcanimicrobium alpinum	3016050	S	11	4e-05	11	3e-05
Flavobacterium faecale	1355330	S	301	0.00105	136	0.00035
Flavobacterium johnsoniae	986	S	34	0.00012	47	0.00012
Chryseobacterium indologenes	253	S	82	0.00029	45	0.00012
Chryseobacterium indoltheticum	254	S	19	7e-05	0	0
Mucilaginibacter sp. SJ	3029053	S	36	0.00013	105	0.00027
Mucilaginibacter sp. SMC90	2929803	S	22	8e-05	45	0.00012
Mucilaginibacter sp. KACC 22773	3025671	S	21	7e-05	44	0.00011
Mucilaginibacter sp. 14171R-50	2703789	S	17	6e-05	34	9e-05
Mucilaginibacter gossypii	551996	S	142	0.0005	300	0.00077
Mucilaginibacter ginsenosidivorans	398053	S	42	0.00015	307	0.00079
Mucilaginibacter ginsenosidivorax	862126	S	29	0.0001	43	0.00011
Mucilaginibacter sabulilitoris	1173583	S	20	7e-05	65	0.00017
Mucilaginibacter rubeus	2027860	S	87	0.0003	222	0.00057
Mucilaginibacter celer	2305508	S	13	5e-05	27	7e-05
Mucilaginibacter paludis	423351	S	11	4e-05	10	3e-05
Pedobacter sp. HDW13	2714940	S	28	0.0001	49	0.00013
Pedobacter ginsengisoli	363852	S	12	4e-05	0	0
Chitinophaga sp. XS-30	2604421	S	25	9e-05	22	6e-05
Chitinophaga sp. LS1	3051176	S	25	9e-05	0	0
Chitinophaga sancti	1004	S	32	0.00011	34	9e-05
Arachidicoccus ginsenosidivorans	496057	S	70	0.00025	202	0.00052
Niastella koreensis	354356	S	97	0.00034	31	8e-05
Ferruginibacter lapsinanis	563172	S	32	0.00011	19	5e-05
Ferruginibacter albus	2875540	S	29	0.0001	26	7e-05
Niabella ginsenosidivorans	1176587	S	12	4e-05	14	4e-05
Niabella yanshanensis	577386	S	16	6e-05	14	4e-05
Flavisolibacter ginsenosidimutans	661481	S	19	7e-05	19	5e-05
Paraflavitalea soli	2315862	S	14	5e-05	25	6e-05
Flavihumibacter fluvii	2838157	S	12	4e-05	20	5e-05
Panacibacter ginsenosidivorans	1813871	S	19	7e-05	15	4e-05
Lacibacter sediminis	2760713	S	17	6e-05	21	5e-05
Dyadobacter fermentans	94254	S	25	9e-05	0	0
Rhodocaloribacter litoris	2558931	S	18	6e-05	15	4e-05
Gemmatirosa kalamazoonensis	861299	S	218	0.00076	293	0.00075
Gemmatimonas aurantiaca	173480	S	36	0.00013	44	0.00011
Gemmatimonas groenlandica	2732249	S	30	0.00011	47	0.00012
Gemmatimonas phototrophica	1379270	S	17	6e-05	27	7e-05
Lignipirellula cremea	2528010	S	22	8e-05	13	3e-05
Stieleria neptunia	2527979	S	10	4e-05	10	3e-05
Anatilimnocola aggregata	2528021	S	13	5e-05	27	7e-05
Lacipirellula parvula	2650471	S	28	0.0001	28	7e-05
Lacipirellula limnantheis	2528024	S	30	0.00011	41	0.00011
Pirellulimonas nuda	2528009	S	15	5e-05	22	6e-05
Botrimarina mediterranea	2528022	S	14	5e-05	24	6e-05
Singulisphaera acidiphila	466153	S	50	0.00018	145	0.00037
Paludisphaera borealis	1387353	S	50	0.00018	109	0.00028
Aquisphaera giovannonii	406548	S	48	0.00017	97	0.00025
Tautonia plasticadhaerens	2527974	S	39	0.00014	86	0.00022
Urbifossiella limnaea	2528023	S	66	0.00023	72	0.00018
Gemmata obscuriglobus	114	S	30	0.00011	27	7e-05
Gemmata sp. SH-PL17	1630693	S	21	7e-05	0	0
Gemmata massiliana	1210884	S	16	6e-05	27	7e-05
Frigoriglobus tundricola	2774151	S	32	0.00011	67	0.00017
Limnoglobus roseus	2598579	S	21	7e-05	33	8e-05
Planctomyces sp. SH-PL14	1632864	S	34	0.00012	32	8e-05
Planctomyces sp. SH-PL62	1636152	S	25	9e-05	75	0.00019
Caulifigura coniformis	2527983	S	21	7e-05	22	6e-05
Planctoellipticum variicoloris	3064265	S	15	5e-05	26	7e-05
Maioricimonas rarisocia	2528026	S	11	4e-05	18	5e-05
Alienimonas californiensis	2527989	S	10	4e-05	11	3e-05
Humisphaera borealis	2807512	S	45	0.00016	58	0.00015
Phycisphaera mikurensis	547188	S	14	5e-05	11	3e-05
Mucisphaera calidilacus	2527982	S	11	4e-05	0	0
Opitutus sp. GAS368	1882749	S	26	9e-05	21	5e-05
Opitutus terrae	107709	S	15	5e-05	27	7e-05
Horticoccus luteus	2862869	S	17	6e-05	19	5e-05
Nibricoccus aquaticus	2576891	S	13	5e-05	13	3e-05
Termitidicoccus mucosus	1184151	S	13	5e-05	17	4e-05
Luteolibacter luteus	2728835	S	18	6e-05	12	3e-05
Luteolibacter sp. LG18	2819286	S	12	4e-05	13	3e-05
Roseimicrobium sp. ORNL1	2711231	S	14	5e-05	25	6e-05
Fontisphaera persica	2974023	S	18	6e-05	15	4e-05
Sorangium cellulosum	56	S	189	0.00066	208	0.00053
Polyangium aurulentum	2567896	S	45	0.00016	46	0.00012
Chondromyces crocatus	52	S	21	7e-05	23	6e-05
Labilithrix luteola	1391654	S	83	0.00029	88	0.00023
Sandaracinus amylolyticus	927083	S	79	0.00028	96	0.00025
Nannocystis poenicansa	2995304	S	75	0.00026	60	0.00015
Haliangium ochraceum	80816	S	28	0.0001	41	0.00011
Myxococcus stipitatus	83455	S	41	0.00014	44	0.00011
Corallococcus sp. EGB	1521117	S	20	7e-05	35	9e-05
Corallococcus coralloides	184914	S	41	0.00014	49	0.00013
Pyxidicoccus parkwaysis	2813578	S	17	6e-05	35	9e-05
Archangium violaceum	83451	S	22	8e-05	51	0.00013
Archangium gephyra	48	S	19	7e-05	29	7e-05
Stigmatella aurantiaca	41	S	23	8e-05	39	0.0001
Cystobacter fuscus	43	S	14	5e-05	13	3e-05
Melittangium boletus	83453	S	13	5e-05	27	7e-05
Anaeromyxobacter oryzae	2918170	S	25	9e-05	33	8e-05
Anaeromyxobacter paludicola	2918171	S	19	7e-05	30	8e-05
Anaeromyxobacter sp. Fw109-5	404589	S	21	7e-05	38	0.0001
Anaeromyxobacter dehalogenans	161493	S	24	8e-05	37	9e-05
Vulgatibacter incomptus	1391653	S	14	5e-05	15	4e-05
Edaphobacter sp. 12200R-103	2703788	S	48	0.00017	546	0.0014
Edaphobacter sp. 4G125	2763071	S	22	8e-05	45	0.00012
Edaphobacter lichenicola	2051959	S	27	9e-05	70	0.00018
Edaphobacter flagellatus	1933044	S	12	4e-05	71	0.00018
Granulicella sp. WH15	2602070	S	20	7e-05	61	0.00016
Granulicella mallensis	940614	S	12	4e-05	36	9e-05
Terriglobus roseus	392734	S	11	4e-05	59	0.00015
Acidobacterium capsulatum	33075	S	23	8e-05	56	0.00014
Alloacidobacterium dinghuense	2763107	S	24	8e-05	41	0.00011
Acidisarcina polymorpha	2211140	S	16	6e-05	23	6e-05
Occallatibacter riparius	1002689	S	13	5e-05	41	0.00011
Paludibaculum fermentans	1473598	S	22	8e-05	20	5e-05
uncultured Paludibaculum sp.	1765020	S	19	7e-05	22	6e-05
Luteitalea sp. TBR-22	2802971	S	84	0.00029	92	0.00024
Luteitalea pratensis	1855912	S	73	0.00026	80	0.00021
Borrelia miyamotoi	47466	S	75	0.00026	54	0.00014
Candidatus Mycosynbacter amalyticus	2665156	S	10	4e-05	38	0.0001
Nitrospira moscoviensis	42253	S	16	6e-05	16	4e-05
Persicimonas caeni	2292766	S	13	5e-05	16	4e-05
Homo sapiens	9606	S	9553	0.03344	9650	0.02476
Candidatus Nitrosocosmicus oleophilus	1353260	S	22	8e-05	32	8e-05
Candidatus Nitrososphaera gargensis	497727	S	20	7e-05	16	4e-05
Streptomyces sp. NBC_00243	2975688	S	0	0	28	7e-05
Streptomyces sp. NBC_01591	2975888	S	0	0	28	7e-05
Streptomyces sp. NBC_00440	2975741	S	0	0	27	7e-05
Streptomyces sp. VNUA24	3031131	S	0	0	26	7e-05
Streptomyces sp. NBC_01197	2903768	S	0	0	23	6e-05
Streptomyces sp. NBC_00328	2903646	S	0	0	25	6e-05
Streptomyces sp. NBC_01445	2903869	S	0	0	22	6e-05
Streptomyces sp. ITFR-16	3075198	S	0	0	22	6e-05
Streptomyces sp. CGMCC 4.1772	3111774	S	0	0	24	6e-05
Streptomyces sp. NBC_00400	2975737	S	0	0	21	5e-05
Streptomyces sp. CB09001	2083284	S	0	0	22	6e-05
Streptomyces sp. S1D4-11	2721246	S	0	0	21	5e-05
Streptomyces sp. 3211	1964449	S	0	0	18	5e-05
Streptomyces sp. PBH53	1577075	S	0	0	18	5e-05
Streptomyces sp. HUAS 31	3020055	S	0	0	21	5e-05
Streptomyces sp. AMCC400023	2056258	S	0	0	20	5e-05
Streptomyces sp. NBC_01483	2903883	S	0	0	18	5e-05
Streptomyces sp. NBC_00386	2975734	S	0	0	18	5e-05
Streptomyces sp. NBC_01439	2903867	S	0	0	17	4e-05
Streptomyces sp. BRB040	3142634	S	0	0	17	4e-05
Streptomyces sp. NBC_01224	2903783	S	0	0	15	4e-05
Streptomyces sp. 2323.1	1938841	S	0	0	16	4e-05
Streptomyces sp. NBC_01717	2975918	S	0	0	15	4e-05
Streptomyces sp. NBC_00444	2975744	S	0	0	19	5e-05
Streptomyces sp. SirexAA-E	862751	S	0	0	14	4e-05
Streptomyces sp. NBC_01260	2903801	S	0	0	18	5e-05
Streptomyces sp. NBC_00445	2975745	S	0	0	17	4e-05
Streptomyces sp. NBC_00696	2903672	S	0	0	14	4e-05
Streptomyces sp. CB04723	2748873	S	0	0	21	5e-05
Streptomyces sp. XC 2026	2782004	S	0	0	15	4e-05
Streptomyces sp. S465	2979468	S	0	0	13	3e-05
Streptomyces sp. NBC_01230	2903784	S	0	0	13	3e-05
Streptomyces sp. CB00271	2750025	S	0	0	17	4e-05
Streptomyces sp. NBC_01207	2903772	S	0	0	13	3e-05
Streptomyces sp. CFMR 7	1649184	S	0	0	17	4e-05
Streptomyces sp. VN1	1821625	S	0	0	17	4e-05
Streptomyces sp. NBC_00385	2975733	S	0	0	12	3e-05
Streptomyces sp. WY228	2855836	S	0	0	12	3e-05
Streptomyces sp. M56	1495638	S	0	0	24	6e-05
Streptomyces sp. AM 3-1-1	3028711	S	0	0	11	3e-05
Streptomyces sp. NBC_00353	2975722	S	0	0	10	3e-05
Streptomyces sp. NBC_01727	2975924	S	0	0	10	3e-05
Streptomyces sp. ZYX-F-203	3144102	S	0	0	10	3e-05
Streptomyces sp. EMB24	2835531	S	0	0	12	3e-05
Streptomyces sp. S063	2005885	S	0	0	11	3e-05
Streptomyces sp. 769	1262452	S	0	0	22	6e-05
Streptomyces koyangensis	188770	S	0	0	18	5e-05
Streptomyces qaidamensis	1783515	S	0	0	11	3e-05
Streptomyces microflavus	1919	S	0	0	23	6e-05
Streptomyces violaceusniger	68280	S	0	0	25	6e-05
Streptomyces nigrescens	1920	S	0	0	52	0.00013
Streptomyces capitiformicae	2014920	S	0	0	23	6e-05
Streptomyces chromofuscus	42881	S	0	0	25	6e-05
Streptomyces gardneri	66892	S	0	0	22	6e-05
Streptomyces changanensis	2964669	S	0	0	21	5e-05
Streptomyces luteogriseus	68233	S	0	0	22	6e-05
Streptomyces pluripotens	1355015	S	0	0	20	5e-05
Streptomyces hawaiiensis	67305	S	0	0	20	5e-05
Streptomyces clavifer	68188	S	0	0	19	5e-05
Streptomyces viridosporus	67581	S	0	0	18	5e-05
Streptomyces hundungensis	1077946	S	0	0	18	5e-05
Streptomyces deccanensis	424188	S	0	0	17	4e-05
Streptomyces argyrophyllae	2726118	S	0	0	17	4e-05
Streptomyces longhuiensis	2880933	S	0	0	17	4e-05
Streptomyces thermocarboxydus	59299	S	0	0	17	4e-05
Streptomyces atratus	1893	S	0	0	16	4e-05
Streptomyces cyaneogriseus	68192	S	0	0	18	5e-05
Streptomyces prasinus	67345	S	0	0	14	4e-05
Streptomyces iakyrus	68219	S	0	0	15	4e-05
Streptomyces cyanogenus	80860	S	0	0	16	4e-05
Streptomyces caniferus	285557	S	0	0	15	4e-05
Streptomyces murinus	33900	S	0	0	34	9e-05
Streptomyces avermitilis	33903	S	0	0	14	4e-05
Streptomyces vinaceus	1960	S	0	0	14	4e-05
Streptomyces bobili	67280	S	0	0	38	0.0001
Streptomyces durocortorensis	2811104	S	0	0	14	4e-05
Streptomyces finlayi	67296	S	0	0	13	3e-05
Streptomyces drozdowiczii	202862	S	0	0	12	3e-05
Streptomyces caniscabiei	2746961	S	0	0	13	3e-05
Streptomyces xiamenensis	408015	S	0	0	11	3e-05
Streptomyces sudanensis	436397	S	0	0	11	3e-05
Streptomyces mirabilis	68239	S	0	0	41	0.00011
Streptomyces goshikiensis	1942	S	0	0	27	7e-05
Kitasatospora sp. HUAS 3-15	3004092	S	0	0	25	6e-05
Kitasatospora aureofaciens	1894	S	0	0	24	6e-05
Actinacidiphila bryophytorum	1436133	S	0	0	42	0.00011
Streptantibioticus cattleyicolor	29303	S	0	0	17	4e-05
Nocardioides yefusunii	2500546	S	0	0	96	0.00025
Aeromicrobium senzhongii	2663859	S	0	0	20	5e-05
Aeromicrobium duanguangcaii	2968086	S	0	0	20	5e-05
Micropruina glycogenica	75385	S	0	0	21	5e-05
Tessaracoccus aquimaris	1332264	S	0	0	24	6e-05
Tessaracoccus flavescens	399497	S	0	0	23	6e-05
Propioniciclava sp. MC1595	2760308	S	0	0	30	8e-05
Raineyella sp. W15-4	3081651	S	0	0	19	5e-05
Propionibacterium freudenreichii	1744	S	0	0	30	8e-05
Propionibacterium australiense	119981	S	0	0	15	4e-05
Acidipropionibacterium jensenii	1749	S	0	0	29	7e-05
Acidipropionibacterium acidipropionici	1748	S	0	0	16	4e-05
Arachnia propionica	1750	S	0	0	22	6e-05
Brooklawnia propionicigenes	3041175	S	0	0	23	6e-05
Propionimicrobium sp. PCR01-08-3	3052086	S	0	0	11	3e-05
Microbacterium sp. cx-55	2875948	S	0	0	41	0.00011
Microbacterium sp. M28	2962064	S	0	0	36	9e-05
Microbacterium sp. ET2	3050384	S	0	0	30	8e-05
Microbacterium sp. zg-B96	3049069	S	0	0	30	8e-05
Microbacterium sp. Clip185	3025663	S	0	0	28	7e-05
Microbacterium sp. LKL04	912630	S	0	0	27	7e-05
Microbacterium sp. zg-Y625	3049071	S	0	0	25	6e-05
Microbacterium sp. 1S1	2606451	S	0	0	64	0.00016
Microbacterium sp. TPU 3598	1938334	S	0	0	20	5e-05
Microbacterium sp. RG1	2489212	S	0	0	18	5e-05
Microbacterium sp. SL75	2995140	S	0	0	16	4e-05
Microbacterium sediminis	904291	S	0	0	71	0.00018
Microbacterium atlanticum	2782168	S	0	0	32	8e-05
Microbacterium chengjingii	2769067	S	0	0	29	7e-05
Microbacterium oleivorans	273677	S	0	0	33	8e-05
Microbacterium fandaimingii	2708079	S	0	0	31	8e-05
Microbacterium luteum	2782167	S	0	0	52	0.00013
Microbacterium abyssi	2782166	S	0	0	29	7e-05
Microbacterium invictum	515415	S	0	0	23	6e-05
Microbacterium schleiferi	69362	S	0	0	39	0.0001
Microbacterium arborescens	33883	S	0	0	22	6e-05
Microbacterium lushaniae	2614639	S	0	0	20	5e-05
Microbacterium aurum	36805	S	0	0	22	6e-05
Microbacterium oryzae	743009	S	0	0	18	5e-05
Microbacterium endophyticum	1526412	S	0	0	15	4e-05
Microbacterium liquefaciens	33918	S	0	0	48	0.00012
Curtobacterium sp. MCLR17_007	2175648	S	0	0	32	8e-05
Curtobacterium sp. 9128	1793722	S	0	0	31	8e-05
Curtobacterium sp. MCPF17_002	2175645	S	0	0	26	7e-05
Curtobacterium sp. MR_MD2014	1561023	S	0	0	35	9e-05
Curtobacterium sp. L6-1	2841594	S	0	0	28	7e-05
Curtobacterium sp. MCPF17_052	2175655	S	0	0	26	7e-05
Curtobacterium sp. MCLR17_032	2175650	S	0	0	27	7e-05
Curtobacterium sp. TC1	2862880	S	0	0	36	9e-05
Curtobacterium sp. YC1	2795488	S	0	0	16	4e-05
Curtobacterium sp. MCSS17_007	2175646	S	0	0	18	5e-05
Agromyces badenianii	2080742	S	0	0	44	0.00011
Rathayibacter sp. VKM Ac-2801	2609255	S	0	0	36	9e-05
Rathayibacter iranicus	59737	S	0	0	23	6e-05
Rathayibacter rathayi	33887	S	0	0	13	3e-05
Cryobacterium sp. SO1	1897061	S	0	0	26	7e-05
Cryobacterium sp. PAMC25264	2861288	S	0	0	24	6e-05
Cryobacterium breve	1259258	S	0	0	26	7e-05
[truncated: 656 more rows]

## Sheet: Fig S2
Clearwater Russet, Sunshine Mix4 + sand, spring/summer 2023			Russet Norkotah, Sunshine Mix 4, winter/spring 2024			Snowden, Adkins soil, harvested 8/19/2024				Clearwater Russet, Adkins soil, harvested 8/19/2024
Treatment	Number of tubers per plant (=experimental unit)		Treatment	Number of tubers per experimental unit		Treatment	Number of tubers per plant	Number of tubers per plant per experimental unit		Treatment	Number of tubers per plant	Number of tubers per plant per experimental unit
NP	6		P	22		0x	10	10		0x	12	11.3333
NP	2		P	14		0x	11	12.5		0x	10
NP	11		P	18		0x	14			0x	12
NP	8		P	19		0x	10	11.3333		0x	12	8
NP	6		P20x	23		0x	8			0x	4
NP	4		P20x	19		0x	16			0x	3	8
NP	6		P20x	12		0x	6	9.33333		0x	13
NP	6		P20x	25		0x	12			0x	9	7.5
NP	11		P50x	14		0x	10			0x	6
NP	7		P50x	22		0x	8	12.3333		0x	7	11.6667
NP	8		P50x	35		0x	17			0x	18
P	9		NP	22		0x	12			0x	10
P	5		NP	19		0x	4	6.66667		0x	13	13
P	7		NP	17		0x	9			0x	13
P	4		NP	12		0x	7			20x	16	13.3333
P	8		NP20x	21		20x	7	11		20x	10
P	8		NP20x	18		20x	15			20x	14
P	7		NP20x	18		20x	15	11.3333		20x	6	11
P	6		NP20x	11		20x	10			20x	16
P	8		NP50x	8		20x	9			20x	10	10
P	8		NP50x	16		20x	11	9.33333		20x	6	11
P1x	3		NP50x	17		20x	10			20x	16
P1x	2					20x	7			20x	12	16.6667
P1x	7					20x	10	10.3333		20x	16
P1x	8					20x	8			20x	22
P1x	6					20x	13			50x	10	12
P1x	8					20x	10	11		50x	14
P1x	9					20x	12			50x	9	12
P1x	9					20x	11			50x	15
P1x	7					20x	8	8		50x	18	18
P1x	12					50x	14	16.5		50x	14	14
P5x	12					50x	19			50x	10	10
P5x	7					50x	14	14
P5x	12					50x	14
P5x	5					50x	10	9.5
P5x	6					50x	9
P5x	8					50x	11	11
P5x	11
P5x	5
P5x	10
P5x	6
P20x	12
P20x	6
P20x	5
P20x	5
P20x	8
P20x	12
P20x	11
P20x	8
P20x	9

## Sheet: Fig S3
Clearwater Russet, Sunshine Mix4 + sand, spring/summer 2023									Clearwater Russet, Adkins soil, harvested 8/19/2024									Russet Norkotah, Sunshine Mix 4, winter/spring 2024									Snowden, Adkins soil, harvested 8/19/2024
	<10 g	10-50 g	50-100 g	100-150 g	150-200 g	200-250 g	250-300 g			<10 g	10-50 g	50-100 g	100-150 g	150-200 g	200-250 g	250-300 g			<10 g	10-50 g	50-100 g	100-150 g	150-200 g	200-250 g	250-300 g			<10 g	10-50 g	50-100 g	100-150 g	150-200 g	200-250 g	250-300 g
NP	0	3	1	2	0	0	0		0x	4.33333	4.66667	1	1	0.333333	0	0		P	1.66667	4.66667	0.666667	0.333333	0	0	0		0x	2	1	3	3	1	0	0
NP	0	1	1	0	0	0	0		0x	2	4	1.5	0	0.5	0	0		P	0.666667	3.66667	0.333333	0	0	0	0		0x	0	5	4.5	0.5	1.5	0.5	0
NP	2	5	2	2	0	0	0		0x	3	2.5	1.5	1	0	0	0		P	2	2.33333	1.66667	0	0	0	0		0x	2.66667	5.33333	2	0.666667	0.666667	0	0
NP	2	2	2	2	0	0	0		0x	2	3	2.5	0	0	0	0		P	2	2.66667	1	0.666667	0	0	0		0x	1.33333	4.66667	1.66667	0.666667	1	0	0
NP	1	2	0	3	0	0	0		0x	2.33333	5	3	0.666667	0.666667	0	0		P20x	1.33333	3.33333	2.33333	0.666667	0	0	0		0x	2.33333	4	3.66667	2	0.333333	0	0
NP	0	2	0	2	0	0	0		0x	3	6	3	0.5	0	0.5	0		P20x	1	2.66667	2	0.666667	0	0	0		0x	0.333333	2.33333	2.66667	0.333333	1	0	0
NP	0	2	3	1	0	0	0		20x	3.66667	6.33333	1.66667	1	0.333333	0.333333	0		P20x	0.5	5	0.5	0	0	0	0		20x	2	3	2	3	0.5	0	0.5
NP	0	4	1	1	0	0	0		20x	4	4.5	2	0.5	0	0	0		P20x	3	4	1.33333	0	0	0	0		20x	2.66667	3	2.33333	1.33333	1.66667	0.333333	0
NP	2	4	4	1	0	0	0		20x	4	5	1	0	0	0	0		P50x	1	1.33333	2	0.333333	0	0	0		20x	1	3.66667	3.33333	0.666667	0.666667	0	0
NP	0	2	3	1	1	0	0		20x	2.5	5.5	2	1	0	0	0		P50x	3.66667	1.66667	1.66667	0.333333	0	0	0		20x	1.33333	2.66667	3.33333	1.33333	1.33333	0.333333	0
NP	2	2	3	1	0	0	0		20x	6	8.66667	2	0	0	0	0		P50x	5	8	3	1	0.5	0	0		20x	1.33333	2	3.33333	2.33333	1.66667	0.333333	0
P	1	5	2	1	0	0	0		50x	2	6	2.5	1.5	0	0	0		NP	2.33333	2	1.66667	0.333333	0	0	0		20x	2	2	1	1	1	1	0
P	0	3	2	0	0	0	0		50x	6.5	4	1.5	0	0	0	0		NP	2	2	1.33333	0	0.333333	0	0		50x	3.5	6.5	3	2.5	1	0	0
P	0	5	1	0	1	0	0		50x	8	7	2	1	0	0	0		NP	1.5	1.5	2.5	0.5	0	0	0		50x	1.5	4.5	4.5	2.5	0.5	0.5	0
P	0	1	1	2	0	0	0		50x	11	3	0	0	0	0	0		NP20x	2.66667	3	1	0.333333	0	0	0		50x	2	2.5	3.5	1.5	0	0	0
P	0	4	4	0	0	0	0		50x	1	6	1	2	0	0	0		NP20x	2	3	0.666667	0.333333	0	0	0		50x	4	4	3	0	0	0	0
P	0	3	5	0	0	0	0											NP20x	1.66667	2	1	1.33333	0	0	0
P	2	1	3	1	0	0	0											NP50x	1	2	1	0	0	0	0
P	0	2	2	0	2	0	0											NP50x	0.333333	2.33333	2	0.333333	0.333333	0	0
P	2	2	2	1	1	0	0											NP50x	0	3	1.66667	0.333333	0.333333	0.333333	0
P	1	2	1	4	0	0	0											NP50x	1.66667	1.66667	0.333333	0.666667	0.333333	0.333333	0
P1x	0	0	1	2	0	0	0
P1x	0	0	0	2	0	0	0
P1x	1	4	1	1	0	0	0
P1x	0	4	2	1	1	0	0
P1x	0	2	3	1	0	0	0
P1x	0	3	4	1	0	0	0
P1x	1	3	2	2	1	0	0
P1x	0	4	4	1	0	0	0
P1x	1	3	1	2	0	0	0
P1x	1	6	5	0	0	0	0
P5x	2	6	2	2	0	0	0
P5x	0	2	5	0	0	0	0
P5x	2	6	4	0	0	0	0
P5x	3	1	0	1	0	0	0
P5x	1	0	1	3	1	0	0
P5x	1	4	3	0	0	0	0
P5x	1	8	0	2	0	0	0
P5x	0	2	1	0	1	1	0
P5x	4	5	1	0	0	0	0
P5x	0	3	2	1	0	0	0
P20x	3	5	3	1	0	0	0
P20x	0	3	2	0	1	0	0
P20x	0	4	0	1	0	0	0
P20x	2	0	0	2	0	0	1
P20x	0	2	3	2	1	0	0
P20x	2	7	2	1	0	0	0
P20x	1	7	2	1	0	0	0
P20x	1	3	2	2	0	0	0
P20x	0	5	4	0	0	0	0

## Sheet: Fig S4
Snowden, Adkins soil, harvested 8/19/2024			Clearwater Russet, Adkins soil, harvested 8/19/2024
Treatment	specific gravity		Treatment	specific gravity
0x	1.07808		0x	1.05488
0x	1.07621		0x	1.00052
0x	1.0593		0x	1.01827
0x	1.06758		0x	1.05215
0x	1.05933		0x	1.0687
0x	1.05069		0x	1.06405
20x	1.05835		20x	1.14083
20x	1.07534		20x	1.01896
20x	1.07599		20x	1.03727
20x	1.07406		20x	1.03656
20x	1.08575		20x	1.02784
20x	1.04198		50x	1.02449
50x	1.06261		50x	1.01578
50x	1.06112		50x	1.01399
50x	1.03895		50x	1.01099
50x	1.00636		50x	1.03419
50x	1.03763
50x	1.04084

## Sheet: Table 2
Spring/Summer 2023			Winter/Spring 2024			Spring/Summer 2024			Spring/Summer 2024
Clearwater Russet			Russet Norkotah			Clearwater Russet			Snowden
Treatment	Total tuber weight per plant (g)		Treatment	Total tuber weight per plant (g)		Treatment	Total tuber weight per plant (g)		Treatment	Total tuber weight per plant (g)
NP-NT	414		NP-NT	220.783		NP-NT	414.8		NP-NT	828.8
NP-NT	105		NP-NT	237.107		NP-NT	272.7		NP-NT	979.3
NP-NT	498		NP-NT	306.11		NP-NT	312.5		NP-NT	523.033
NP-NT	463		NP-20X	209.04		NP-NT	285.15		NP-NT	511.033
NP-NT	442		NP-20X	181.52		NP-NT	571.3		NP-NT	670.667
NP-NT	314		NP-20X	287.023		NP-NT	593.7		NP-NT	437.767
NP-NT	367		NP-50X	125.15		NP-20X	551.2		NP-20X	855.25
NP-NT	332		NP-50X	302.783		NP-20X	352.05		NP-20X	779.967
NP-NT	554		NP-50X	367.297		NP-20X	245.9		NP-20X	552.833
NP-NT	584		NP-50X	288.81		NP-20X	413.8		NP-20X	779.633
NP-NT	409		P-NT	233.913		NP-20X	387.433		NP-20X	954.667
P-NT	383		P-NT	114.297		NP-50X	514.95		NP-20X	700.9
P-NT	271		P-NT	207.167		NP-50X	226.1		NP-50X	937.55
P-NT	348		P-NT	250.79		NP-50X	453.4		NP-50X	988.05
P-NT	333		P-20X	331.31		NP-50X	127.8		NP-50X	493.25
P-NT	328		P-20X	297.067		NP-50X	523.2		NP-50X	358.1
P-NT	448		P-20X	207.025
P-NT	339		P-20X	235.043
P-NT	538		P-50X	235.377
P-NT	528		P-50X	223.3
P-NT	523		P-50X	332.753
P-1X	270
P-1X	248
P-1X	373
P-1X	565
P-1X	366
P-1X	547
P-1X	643
P-1X	522
P-1X	429
P-1X	582
P-5X	629
P-5X	364
P-5X	426
P-5X	155
P-5X	600
P-5X	320
P-5X	399
P-5X	518
P-5X	198
P-5X	333
P-20X	530
P-20X	431
P-20X	235
P-20X	504
P-20X	685
P-20X	523
P-20X	481
P-20X	468
P-20X	442

## Sheet: Table 3
Clearwater Russet						Snowden
Total thiamin (nmol per g DW)						Total thiamin (nmol per g DW)
Treatment	Tubers	Leaves	Stems	Roots		Treatment	Tubers	Leaves	Stems	Roots
No thiamin	9.24	2.4	7.46667	99.2		No thiamin	6.88	8.53333	15.7333	127.733
No thiamin	7.96	2.66667	13.8667	100		No thiamin	7	1.86667	3.2	133.333
No thiamin	9.72	9.06667	52.8	131.2		No thiamin	9.08	1.06667	5.33333	131.2
No thiamin	n.a.	1.33333	13.6	n.a.		No thiamin	n.a.	n.a.	16.8	n.a.
20X thiamin	15.48	n.a.	n.a.	1437.07		20X thiamin	9.68	n.a.	n.a.	2969.33
20X thiamin	18.16	n.a.	n.a.	3995.47		20X thiamin	9.88	n.a.	n.a.	1085.33
20X thiamin	29	n.a.	n.a.	886.933		20X thiamin	7.8	n.a.	n.a.	4577.87
20X thiamin	n.a.	n.a.	n.a.	n.a.		20X thiamin	n.a.	n.a.	n.a.	n.a.
50X thiamin	73.64	16.8	27.7333	3146.4		50X thiamin	28.2	21.3333	25.3333	5548.27
50X thiamin	38.76	8	26.6667	9362.93		50X thiamin	10.84	17.3333	38.1333	10726.9
50X thiamin	41.92	7.73333	36	6782.67		50X thiamin	25.24	8.26667	18.6667	4310.93
50X thiamin	n.a.	2.13333	48.2667	n.a.		50X thiamin	n.a.	n.a.	45.3333	n.a.
n.a., not applicable

## Sheet: Table 4
Treatment	pH	EC (dS/m)	Active C (ppm)	CO2 respiration 24 hr (ug CO2-C/g dry soil/day)	CO2 respiration 96 hr (ug CO2-C/g dry soil/day)
0X	5.54	0.55	91	6	5
0X	5.61	0.46	86	6	5
0X	5.3	0.43	79	6	5
0X	5.24	0.49	84	5	3
0X	5.67	0.23	84	6	4
0X	5.22	0.5	79	5	5
20X	5.01	0.67	111	9	8
20X	5.1	0.54	82	9	8
20X	5.32	0.42	82	9	8
20X	5.3	0.74	82	8	6
20X	5.36	0.49	87	11	9
20X	5.1	0.84	108	9	7
50X	4.94	1.04	108	8	8
50X	5.04	0.74	84	7	6
50X	4.93	0.52	67	8	7
50X	5.05	0.42	81	9	7
