# Supplementary material for: Thiamin addition to soil increases potato tuber thiamin content under greenhouse conditions
Source: PeerJ. 2026 Jan 29;14:e20684. doi: 10.7717/peerj.20684 (PMC12861137; doi:10.7717/peerj.20684)
Supplement: Supplemental Information 11 — Three soil samples per treatment (NP, not pasteurized; P, pasteurized) were analyzed for moisture content, active carbon, CO2 respiration, pH, and electroconductivity (EC). [file peerj-14-20684-s011.xlsx]

## Sheet: Sheet1
At planting	Moisture (%)	Active C (ppm)	CO2 respiration 24 hr (ug CO2-C/g dry soil/day)	CO2 respiration 96 hr (ug CO2-C/g dry soil/day)	pH Units	EC (dS/m)
NP1	339	3361	138	104	6.03	1.76		115.667	89
NP2	276	3187	97	82	6.13	1.47
NP3	293	4198	112	81	6.09	1.63
P1	299	2845	85	72	6.12	1.13		75	63
P2	291	2680	59	55	6.1	1.53
P3	283	3073	81	62	6.05	1.8		0.648415	0.707865
two-tailed t-test	p=0.58	p=0.096889	0.048	0.062	0.858	0.562
one-tailed		p=0.048	0.024	0.031	0.429	0.281
At harvest
NP-2,3,7		1441	55	47	4.33	0.021
NP20x-4,5,10		1448	78	60	4.51	0.023
NP50x-4,5,6		1457	83	61	4.58	0.017
P-2,6,11		1459	62	50	4.39	0.027
P20x-1,9,10		1448	70	53	4.6	0.011
P50x-2,8,9		1428	123	90	4.65	0.01
